# Supplementary material for: Hydrothermal trace metal release and microbial metabolism in the northeastern Lau Basin of the South Pacific Ocean
Source: Copernicus journal article supplement (doi:10.5194/bg-18-5397-2021), 2021-10-06
Supplement: Supplementary file 1 [file bg-18-5397-2021-supplement.zip]

Archive with 4 entries (4 files):
- bg-18-5397-2021-supplement-title-page.pdf
- Supplement.pdf
- TableS1.xlsx
- TableS2.xlsx
