# Supplementary material for: Hydrothermal trace metal release and microbial metabolism in the northeastern Lau Basin of the South Pacific Ocean
Source: Copernicus journal article supplement (doi:10.5194/bg-18-5397-2021), 2021-10-06
Supplement: Supplementary file 1 [file bg-18-5397-2021-supplement.zip › bg-18-5397-2021-supplement-title-page.pdf]

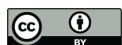

*Supplement of*

**Hydrothermal trace metal release and microbial metabolism in the northeastern Lau Basin of the South Pacific Ocean**

**Natalie R. Cohen et al.**

*Correspondence to:* Natalie R. Cohen (cohen@uga.edu) and Mak A. Saito (msaito@whoi.edu)

- [bg-18-5397-2021-supplement-title-page.pdf](#)
- [Supplement.pdf](#)
- [TableS1.xlsx](#)
- [TableS2.xlsx](#)

The copyright of individual parts of the supplement might differ from the article licence.
