# Supplementary material for: Hydrothermal trace metal release and microbial metabolism in the northeastern Lau Basin of the South Pacific Ocean
Source: Copernicus journal article supplement (doi:10.5194/bg-18-5397-2021), 2021-10-06
Supplement: Supplementary file 1 [file bg-18-5397-2021-supplement.zip › TableS2.xlsx]

## Sheet: merged_TableS2_FeGenie
orf_id	st1_200m	st1_400m	st1_300m	st3_200m	st3_250m	st3_300m	st3_400m	st3_500m	st3_550m	st3_600m	st3_800m	st5_200m	st5_300m	st5_400m	st5_500m	st5_600m	st6_200m	st8_200m	st9_380m	st12_300m	st12_1900m..HT.	permutation.test.p	adj.p	avg.background.counts	avg.background.HT.counts	log.avg.background.HT	FC	logFC	contig_length	orf_length	orf_length_aa	kegg_hit	kegg_desc	kegg_pathway	KO	KO_desc	KO_pathway	EC	GO_terms	uniprot	KOG_id	KOG_desc	KOG_class	KOG_group	best_hit	best_hit_percent_identity	best_hit_annotation	best_hit_GOS_core_cluster	best_hit_species
contig_1142409_78_971_-	0.03	0.03	0.03	0.03	0.03	0.03	0.03	0.03	0.03	0.03	0.03	0.03	0.03	0.03	0.03	0.03	0.03	0.03	0.03	0.03	0.379949	7.74e-06	0.000303852	0.0466642	0.213307	-2.229	8.14219	3.02542	11419	894	298	cyt:cce_4088	tufA; elongation factor Tu; K02358 elongation factor Tu		K02358	elongation factor Tu			0003924||0005525	B1WQY4					gi67921718-NZ_AADV02000004	94	Translation elongation factor Tu:Small GTP-binding protein domain	CAM_CRCL_30	Crocosphaera watsonii WH 8501
contig_1192792_1165_1654_-	0.03	0.03	0.03	0.03	0.03	0.03	0.03	0.03	0.03	0.03	0.03	0.03	0.03	0.03	0.03	0.03	0.03	0.03	0.03	0.03	0.668478	7.74e-06	0.000303852	0.0604037	0.364441	-1.45624	11.0668	3.46817	1655	490	163.333	mop:Mesop_0996	ABC transporter-like protein; K02003		K02003	putative ABC transport system ATP-binding protein			0005524||0016887						PMI41_03749-GCA_000282595.1_PMI41_contig_99.99	85	putative ABC-type transport system involved in lysophospholipase L1 biosynthesis, ATPase component		Phyllobacterium YR531
contig_1200105_1_1034_+	0.03	0.03	0.03	0.03	0.03	0.03	0.03	0.03	0.03	0.03	0.03	0.03	0.03	0.03	0.03	0.03	0.03	0.03	0.03	0.03	0.332567	7.74e-06	0.000303852	0.044408	0.188488	-2.40746	7.48891	2.90476	1711	1034	344.667	amc:MADE_1013295	ClpB protein						0005524||0019538						RNAN_3512-GCA_000296695.1_BAFK01000029	94	ATP-dependent Clp protease ATP-binding subunit ClpB		Rheinheimera nanhaiensis E407-8
contig_1202537_4152_4961_+	0.03	0.03	0.03	0.03	0.03	0.03	0.03	0.03	0.03	0.03	0.03	0.03	0.03	0.03	0.03	0.03	0.03	0.03	0.03	0.03	0.41624	7.74e-06	0.000303852	0.0483924	0.232316	-2.10584	8.60135	3.10456	6031	810	270	lan:Lacal_0423	hypothetical protein												gi161326662-ABIB01000001	69	lipoprotein	CAM_CRCL_21447312	Kordia algicida OT-1
contig_1234039_1_536_+	0.03	0.03	0.03	0.03	0.03	0.03	0.03	0.03	0.03	0.03	0.03	0.03	0.03	0.03	0.03	0.03	0.03	0.03	0.03	0.03	0.613684	7.74e-06	0.000303852	0.0577945	0.335739	-1.57459	10.6184	3.40849	3353	536	178.667	ter:Tery_0998	phycobilisome protein; K05377 phycoerythrin beta chain	ter01100||ter00196	K05377	phycoerythrin beta chain	Photosynthesis - antenna proteins		0015979||0030089	Q117E8					gi67925513-NZ_AADV02000185	97	Phycobilisome protein	CAM_CRCL_3178	Crocosphaera watsonii WH 8501
contig_1252800_1_461_-	0.03	0.03	0.03	0.03	0.03	0.03	0.03	0.03	0.03	0.03	0.03	0.03	0.03	0.03	0.03	0.03	0.03	0.03	0.03	0.03	1.38729	7.74e-06	0.000303852	0.0946327	0.740959	-0.432534	14.6597	3.87378	1197	461	153.667								20037						KSU1_B0261-GCA_000296795.1_BAFH01000002	51	putative nitrate oxidoreductase gamma subunit		planctomycete KSU-1
contig_1254197_1_630_+	0.03	0.03	0.03	0.03	0.03	0.03	0.03	0.03	0.03	0.03	0.03	0.03	0.03	0.03	0.03	0.03	0.03	0.03	0.03	0.03	0.526594	7.74e-06	0.000303852	0.0536473	0.290121	-1.78527	9.81585	3.29511	630	630	210	pla:Plav_0610	chaperonin GroEL; K04077 chaperonin GroEL	pla03018	K04077	chaperonin GroEL	RNA degradation || Longevity regulating pathway - worm || Type I diabetes mellitus || Legionellosis || Tuberculosis		0005524||0044267	A7HQQ0					IMCC14465_11340-GCA_000293845.1_IMCC14465_3	88	hypothetical protein		alpha proteobacterium IMCC14465
contig_1255179_1_1997_-	0.03	0.03	0.03	0.03	0.03	0.03	0.03	0.03	0.03	0.03	0.03	0.03	0.03	0.03	0.03	0.03	0.03	0.03	0.03	0.03	0.499987	7.74e-06	0.000303852	0.0523803	0.276183	-1.8563	9.54531	3.25479	2169	1997	665.667	spl:Spea_3164	ATPase; K03695 ATP-dependent Clp protease ATP-binding subunit ClpB		K03695	ATP-dependent Clp protease ATP-binding subunit ClpB			0005524||0019538	A8H7E3					Spea_3164-NC_009901	92	ATPase; K03695 ATP-dependent Clp protease ATP-binding subunit ClpB	CAM_CRCL_1841	Shewanella pealeana ATCC 700345
contig_1259669_994_1317_-	0.03	0.03	0.03	0.03	0.03	0.03	0.03	0.03	0.03	0.03	0.03	0.03	0.03	0.03	0.03	0.03	0.03	0.03	0.03	0.03	0.9956	7.74e-06	0.000303852	0.075981	0.53579	-0.900259	13.1033	3.71186	1613	324	108	pmi:PMT9312_1379	integral membrane protein, interacts with FtsH; K06890		K06890	uncharacterized protein				Q319K6					PMT9312_1379-NC_007577	88	integral membrane protein, interacts with FtsH; K06890	CAM_CRCL_16301	Prochlorococcus marinus str. MIT 9312
contig_1278170_93_923_+	0.03	0.03	0.03	0.03	0.03	0.03	0.03	0.03	0.03	0.03	0.03	0.03	0.03	0.03	0.03	0.03	0.03	0.03	0.03	0.03	1.15944	7.74e-06	0.000303852	0.0837828	0.621611	-0.685917	13.8386	3.79063	2470	831	277								0005198||0009288||0071973						RNAN_1428-GCA_000296695.1_BAFK01000006	73	flagellin		Rheinheimera nanhaiensis E407-8
contig_1304082_6_821_-	0.03	0.03	0.03	0.03	0.03	0.03	0.03	0.03	0.03	0.03	0.03	0.03	0.03	0.03	0.03	0.03	0.03	0.03	0.03	0.03	0.4134	7.74e-06	0.000303852	0.0482571	0.230829	-2.11511	8.56661	3.09872	983	816	272	pmm:PMM0321	minD; putative septum site-determining protein MinD; K03609 septum site-determining protein MinD		K03609	septum site-determining protein MinD			0000918||0016887	Q7V2X9					PMM0321-NC_005072	80	minD; putative septum site-determining protein MinD; K03609 septum site-determining protein MinD	CAM_CRCL_33033092	Prochlorococcus marinus subsp. pastoris str. CCMP1986
contig_1319501_1_224_-	0.03	0.03	0.03	0.03	0.03	0.03	0.03	0.03	0.03	0.03	0.03	0.03	0.03	0.03	0.03	0.03	0.03	0.03	0.03	0.03	2.82334	7.74e-06	0.000303852	0.163016	1.49318	0.578388	17.3194	4.11432	610	224	74.6667	bja:blr5626	groEL; chaperonin GroEL; K04077 chaperonin GroEL	bja03018	K04077	chaperonin GroEL	RNA degradation || Longevity regulating pathway - worm || Type I diabetes mellitus || Legionellosis || Tuberculosis		0005524||0044267	Q89IK8					blr5626-NC_004463	87	groEL; chaperonin GroEL; K04077 chaperonin GroEL	CAM_CRCL_32430158	Bradyrhizobium diazoefficiens USDA 110
contig_1321687_1_754_-	0.03	0.03	0.03	0.03	0.03	0.03	0.03	0.03	0.03	0.03	0.03	0.03	0.03	0.03	0.03	0.03	0.03	0.03	0.03	0.03	0.859853	7.74e-06	0.000303852	0.0695168	0.464685	-1.10568	12.369	3.62866	754	754	251.333	sil:SPO1001	soxF; sulfur oxidation F protein						0016491||0055114	Q5LUQ2					SPO1001-NC_003911	72	soxF; sulfur oxidation F protein	CAM_CRCL_32370002	Ruegeria pomeroyi DSS-3
contig_1323911_685_966_-	0.03	0.03	0.03	0.03	0.03	0.03	0.03	0.03	0.03	0.03	0.03	0.03	0.03	0.03	0.03	0.03	0.03	0.03	0.03	0.03	1.13941	7.74e-06	0.000303852	0.0828292	0.611121	-0.71047	13.7562	3.78201	1491	282	94										KOG0749	Mitochondrial ADP/ATP carrier proteins	Energy production and conversion	METABOLISM	CAMPEP_0196919074-CAMNT_0042315987	73	PF00153.22: Mitochondrial carrier protein		Symbiodinium type D1a
contig_1348266_331_858_+	0.03	0.03	0.03	0.03	0.03	0.03	0.03	0.03	0.03	0.03	0.03	0.03	0.03	0.03	0.03	0.03	0.03	0.03	0.03	0.03	0.622527	7.74e-06	0.000303852	0.0582156	0.340371	-1.55482	10.6935	3.41866	881	528	176	tps:THAPSDRAFT_24512	hypothetical protein							B8CAG8					CAMPEP_0174707724-CAMNT_0015906149	76			Chrysochromulina brevifilum, Strain UTEX LB 985
contig_1375299_328_674_-	0.03	0.03	0.03	0.03	0.03	0.03	0.03	0.03	0.03	0.03	0.03	0.03	0.03	0.03	0.03	0.03	0.03	0.03	0.03	0.03	0.931598	7.74e-06	0.000303852	0.0729332	0.502265	-0.993478	12.7733	3.67506	674	347	115.667	pmb:A9601_02231	nusG; transcription antitermination protein NusG; K02601 transcriptional antiterminator NusG		K02601	transcriptional antiterminator NusG				A2BP00					A9601_02231-NC_008816	97	nusG; transcription antitermination protein NusG; K02601 transcriptional antiterminator NusG	CAM_CRCL_966	Prochlorococcus marinus str. AS9601
contig_1417375_1_296_+	0.03	0.03	0.03	0.03	0.03	0.03	0.03	0.03	0.03	0.03	0.03	0.03	0.03	0.03	0.03	0.03	0.03	0.03	0.03	0.03	1.08694	7.74e-06	0.000303852	0.0803305	0.583636	-0.77686	13.5309	3.75818	296	296	98.6667	pmn:PMN2A_0981	F0F1 ATP synthase subunit alpha (EC:3.6.3.14); K02111 F-type H+-transporting ATPase subunit alpha [EC:3.6.3.14]	pmn00195||pmn00190||pmn01100	K02111	F-type H+-transporting ATPase subunit alpha [EC:3.6.3.14]	Oxidative phosphorylation || Photosynthesis	3.6.3.14	5524	Q46J57					PMN2A_0981-NC_007335	95	F0F1 ATP synthase subunit alpha (EC:3.6.3.14); K02111 F-type H+-transporting ATPase subunit alpha [EC:3.6.3.14]	CAM_CRCL_33026284	Prochlorococcus marinus str. NATL2A
contig_1448107_250_955_+	0.03	0.03	0.03	0.03	0.03	0.03	0.03	0.03	0.03	0.03	0.03	0.03	0.03	0.03	0.03	0.03	0.03	0.03	0.03	0.03	1.80255	7.74e-06	0.000303852	0.114407	0.958477	-0.0611849	15.7556	3.97779	955	706	235.333														or3661-POR4E_contig00324standard	30	Outer membrane protein and related peptidoglycan-associated (lipo)proteins		Poribacteria WGA-4E
contig_1452756_2191_2466_-	0.03	0.03	0.03	0.03	0.03	0.03	0.03	0.03	0.03	0.03	0.03	0.03	0.03	0.03	0.03	0.03	0.03	0.03	0.03	0.03	1.16353	7.74e-06	0.000303852	0.0839776	0.623754	-0.680951	13.8552	3.79236	2658	276	92	cyt:cce_3242	hypothetical protein						0003700||0006355	B1WXP9					gi67925462-NZ_AADV02000180	100	Transcriptional regulator AbrB	CAM_CRCL_11347	Crocosphaera watsonii WH 8501
contig_1462233_39_767_+	0.03	0.03	0.03	0.03	0.03	0.03	0.03	0.03	0.03	0.03	0.03	0.03	0.03	0.03	0.03	0.03	0.03	0.03	0.03	0.03	0.459156	7.74e-06	0.000303852	0.050436	0.254796	-1.97259	9.10373	3.18646	822	729	243	pmg:P9301_16401	F0F1 ATP synthase subunit gamma (EC:3.6.3.14); K02115 F-type H+-transporting ATPase subunit gamma [EC:3.6.3.14]	pmg00190||pmg00195||pmg01100	K02115	F-type H+-transporting ATPase subunit gamma	Oxidative phosphorylation || Photosynthesis	3.6.3.14	0000275||0015986||0045261||0045262||0046933||0046961	A3PET8					P9301_16401-NC_009091	100	F0F1 ATP synthase subunit gamma (EC:3.6.3.14); K02115 F-type H+-transporting ATPase subunit gamma [EC:3.6.3.14]	CAM_CRCL_9580	Prochlorococcus marinus str. MIT 9301
contig_1468267_1_563_-	0.03	0.03	0.03	0.03	0.03	0.03	0.03	0.03	0.03	0.03	0.03	0.03	0.03	0.03	0.03	0.03	0.03	0.03	0.03	0.03	0.585692	7.74e-06	0.000303852	0.0564615	0.321077	-1.63901	10.3733	3.3748	563	563	187.667	pmi:PMT9312_1529	groEL; chaperonin GroEL; K04077 chaperonin GroEL	pmi03018	K04077	chaperonin GroEL	RNA degradation || Longevity regulating pathway - worm || Type I diabetes mellitus || Legionellosis || Tuberculosis		0005524||0044267	Q318V6					PMT9312_1529-NC_007577	85	groEL; chaperonin GroEL; K04077 chaperonin GroEL	CAM_CRCL_32430158	Prochlorococcus marinus str. MIT 9312
contig_1472562_292_995_-	0.03	0.03	0.03	0.03	0.03	0.03	0.03	0.03	0.03	0.03	0.03	0.03	0.03	0.03	0.03	0.03	0.03	0.03	0.03	0.03	0.474395	7.74e-06	0.000303852	0.0511617	0.262779	-1.92808	9.27247	3.21295	995	704	234.667	pmh:P9215_14891	ftsH; cell division protein FtsH3; K03798 cell division protease FtsH [EC:3.4.24.-]		K03798	cell division protease FtsH [EC:3.4.24.-]			0004222||0005524||0006508	A8G671					P9215_14891-NC_009840	92	ftsH; cell division protein FtsH3; K03798 cell division protease FtsH [EC:3.4.24.-]	CAM_CRCL_4010470	Prochlorococcus marinus str. MIT 9215
contig_1501669_1_861_-	0.03	0.03	0.03	0.03	0.03	0.03	0.03	0.03	0.03	0.03	0.03	0.03	0.03	0.03	0.03	0.03	0.03	0.03	0.03	0.03	0.393362	7.74e-06	0.000303852	0.0473029	0.220332	-2.18225	8.3158	3.05585	1049	861	287	tps:THAPSDRAFT_6285	HSP90_1; HSP90 family member; K04079 molecular chaperone HtpG	tps04141	K04079	molecular chaperone HtpG	Protein processing in endoplasmic reticulum || PI3K-Akt signaling pathway || Antigen processing and presentation || NOD-like receptor signaling pathway || Plant-pathogen interaction || Progesterone-mediated oocyte maturation || Estrogen signaling pathway || Pathways in cancer || Prostate cancer		0005524||0006457||0006950||0051082	B8C637	KOG0019	Molecular chaperone (HSP90 family)	Posttranslational modification, protein turnover, chaperones	CELLULAR PROCESSES AND SIGNALING	CAMPEP_0199813514-CAMNT_0045701577	77	PF00183.13: Hsp90 protein PF02518.21: Histidine kinase-, DNA gyrase B-, and HSP90-like ATPase		Pseudo-nitzschia fraudulenta, Strain WWA7
contig_1519177_1_933_-	0.03	0.03	0.03	0.03	0.03	0.03	0.03	0.03	0.03	0.03	0.03	0.03	0.03	0.03	0.03	0.03	0.03	0.03	0.03	0.03	1.03596	7.74e-06	0.000303852	0.077903	0.556933	-0.844425	13.2981	3.73315	1400	933	311	vvu:VV1_0482	clpB; ATP-dependent chaperone ClpB; K03695 ATP-dependent Clp protease ATP-binding subunit ClpB		K03695	ATP-dependent Clp protease ATP-binding subunit ClpB			5524	Q8DEV2					gi494174573-NZ_JH393258	78	protein disaggregation chaperone		Halomonas boliviensis LC1
contig_1543658_184_617_-	0.03	0.03	0.03	0.03	0.03	0.03	0.03	0.03	0.03	0.03	0.03	0.03	0.03	0.03	0.03	0.03	0.03	0.03	0.03	0.03	0.750863	7.74e-06	0.000303852	0.0643268	0.407595	-1.29479	11.6726	3.54506	617	434	144.667	vha:VIBHAR_00230	nusG; transcription antitermination protein NusG; K02601 transcriptional antiterminator NusG		K02601	transcriptional antiterminator NusG			0003715||0006353||0006355	A7MXE6					VIBC2010_11566-NZ_AEIU01000067	97	transcription termination/antitermination factor NusG	CAM_CRCL_966	Vibrio caribbenthicus ATCC BAA-2122
contig_1548946_1_227_+	0.03	0.03	0.03	0.03	0.03	0.03	0.03	0.03	0.03	0.03	0.03	0.03	0.03	0.03	0.03	0.03	0.03	0.03	0.03	0.03	1.40821	7.74e-06	0.000303852	0.0956292	0.751921	-0.411347	14.7258	3.88027	227	227	75.6667	pme:NATL1_17771	pentapeptide repeat-containing protein							A2C4C3					NATL1_17771-NC_008819	95	pentapeptide repeat-containing protein	CAM_CRCL_28953	Prochlorococcus marinus str. NATL1A
contig_1552918_84_434_+	0.03	0.03	0.03	0.03	0.03	0.03	0.03	0.03	0.03	0.03	0.03	0.03	0.03	0.03	0.03	0.03	0.03	0.03	0.03	0.03	0.921323	7.74e-06	0.000303852	0.072444	0.496884	-1.00902	12.7177	3.66877	434	351	117														CAMPEP_0199921450-CAMNT_0045840855	69			Durinskia baltica, Strain CSIRO CS-38
contig_1563625_1_586_-	0.03	0.03	0.03	0.03	0.03	0.03	0.03	0.03	0.03	0.03	0.03	0.03	0.03	0.03	0.03	0.03	0.03	0.03	0.03	0.03	0.563881	7.74e-06	0.000303852	0.0554229	0.309652	-1.69128	10.1742	3.34684	586	586	195.333	pgv:SL003B_0835	ABC branched amino acid transporter family, periplasmic substrate-binding subunit; K01999 branched-chain amino acid transport system substrate-binding protein	pgv02010	K01999	branched-chain amino acid transport system substrate-binding protein	ABC transporters								gi118588419-NZ_AAUW01000002	58	transcriptional regulator, Fis family	CAM_CRCL_15378	Labrenzia aggregata IAM 12614
contig_1616036_1203_2129_+	0.03	0.03	0.03	0.03	0.03	0.03	0.03	0.03	0.03	0.03	0.03	0.03	0.03	0.03	0.03	0.03	0.03	0.03	0.03	0.03	0.367491	7.74e-06	0.000303852	0.046071	0.206781	-2.27382	7.97663	2.99578	3210	927	309	amu:Amuc_1408	chaperonin GroEL; K04077 chaperonin GroEL	amu03018	K04077	chaperonin GroEL	RNA degradation || Longevity regulating pathway - worm || Type I diabetes mellitus || Legionellosis || Tuberculosis		0005524||0044267	B2UKV8					gi149176814-NZ_ABCE01000021	74	chaperonin GroL	CAM_CRCL_36	Planctomyces maris DSM 8797
contig_1616885_1_1111_+	0.03	0.03	0.03	0.03	0.03	0.03	0.03	0.03	0.03	0.03	0.03	0.03	0.03	0.03	0.03	0.03	0.03	0.03	0.03	0.03	0.593194	7.74e-06	0.000303852	0.0568188	0.325007	-1.62146	10.4401	3.38406	1154	1111	370.333	sit:TM1040_0597	groEL; chaperonin GroEL; K04077 chaperonin GroEL	sit03018	K04077	chaperonin GroEL	RNA degradation || Longevity regulating pathway - worm || Type I diabetes mellitus || Legionellosis || Tuberculosis		0005524||0044267	Q1GJ36					TM1040_0597-NC_008044	93	groEL; chaperonin GroEL; K04077 chaperonin GroEL	CAM_CRCL_32430158	Ruegeria TM1040
contig_1617347_185_1021_+	0.03	0.03	0.03	0.03	0.03	0.03	0.03	0.03	0.03	0.03	0.03	0.03	0.03	0.03	0.03	0.03	0.03	0.03	0.03	0.03	0.403781	7.74e-06	0.000303852	0.0477991	0.22579	-2.14695	8.44746	3.07852	2764	837	279	pmm:PMM0642	cysD; putative O-acetyl homoserine sulfhydrylase (EC:2.5.1.49); K01740 O-acetylhomoserine (thiol)-lyase [EC:2.5.1.49]	pmm01100||pmm00270	K01740	O-acetylhomoserine (thiol)-lyase [EC:2.5.1.49]	Cysteine and methionine metabolism	2.5.1.49	0003961||0030170	Q7TUC3					PMM0642-NC_005072	91	cysD; putative O-acetyl homoserine sulfhydrylase (EC:2.5.1.49); K01740 O-acetylhomoserine (thiol)-lyase [EC:2.5.1.49]	CAM_CRCL_32411328	Prochlorococcus marinus subsp. pastoris str. CCMP1986
contig_1632672_167_564_+	0.03	0.03	0.03	0.03	0.03	0.03	0.03	0.03	0.03	0.03	0.03	0.03	0.03	0.03	0.03	0.03	0.03	0.03	0.03	0.03	0.816066	7.74e-06	0.000303852	0.0674317	0.441749	-1.1787	12.1021	3.59719	564	398	132.667	ddf:DEFDS_0240	groEL; chaperonin GroEL; K04077 chaperonin GroEL	ddf03018	K04077	chaperonin GroEL	RNA degradation || Longevity regulating pathway - worm || Type I diabetes mellitus || Legionellosis || Tuberculosis		0005524||0044267	D3PAX8					gi149176814-NZ_ABCE01000021	79	chaperonin GroL	CAM_CRCL_36	Planctomyces maris DSM 8797
contig_1636832_843_966_+	0.03	0.03	0.03	0.03	0.03	0.03	0.03	0.03	0.03	0.03	0.03	0.03	0.03	0.03	0.03	0.03	0.03	0.03	0.03	0.03	2.55302	7.74e-06	0.000303852	0.150144	1.35158	0.434649	17.0038	4.08779	966	124	41.3333	pmh:P9215_18991	sam1; S-adenosyl-L-homocysteine hydrolase; K01251 adenosylhomocysteinase [EC:3.3.1.1]	pmh01100||pmh00270	K01251	adenosylhomocysteinase [EC:3.3.1.1]	Cysteine and methionine metabolism	3.3.1.1	0004013||0006730	A8G7D1					P9215_18991-NC_009840	97	sam1; S-adenosyl-L-homocysteine hydrolase; K01251 adenosylhomocysteinase [EC:3.3.1.1]	CAM_CRCL_360	Prochlorococcus marinus str. MIT 9215
contig_1637206_1_728_+	0.03	0.03	0.03	0.03	0.03	0.03	0.03	0.03	0.03	0.03	0.03	0.03	0.03	0.03	0.03	0.03	0.03	0.03	0.03	0.03	0.459745	7.74e-06	0.000303852	0.0504641	0.255105	-1.97084	9.11035	3.18751	786	728	242.667														HIMB100_00019690-GCA_000238815.2_contig10	36	hypothetical protein		SAR116 cluster alpha proteobacterium HIMB100
contig_1637262_1_301_-	0.03	0.03	0.03	0.03	0.03	0.03	0.03	0.03	0.03	0.03	0.03	0.03	0.03	0.03	0.03	0.03	0.03	0.03	0.03	0.03	3.14815	7.74e-06	0.000303852	0.178483	1.66332	0.734063	17.6383	4.14064	380	301	100.333	tcy:Thicy_1509	rhodopsin						16020						CAMPEP_0179040430-CAMNT_0020736777	76	PF01036.13: Bacteriorhodopsin-like protein		Pyrodinium bahamense
contig_1638019_1_512_+	0.03	0.03	0.03	0.03	0.03	0.03	0.03	0.03	0.03	0.03	0.03	0.03	0.03	0.03	0.03	0.03	0.03	0.03	0.03	0.03	0.641044	7.74e-06	0.000303852	0.0590973	0.350071	-1.51428	10.8473	3.43926	710	512	170.667	csa:Csal_2485	TRAP dicarboxylate transporter-DctP subunit						0006810||0030288	Q1QUM6					HIMB100_00017680-GCA_000238815.2_contig10	75	TRAP-type mannitol/chloroaromatic compound transport system, periplasmic component		SAR116 cluster alpha proteobacterium HIMB100
contig_1644791_1_1027_+	0.03	0.03	0.03	0.03	0.03	0.03	0.03	0.03	0.03	0.03	0.03	0.03	0.03	0.03	0.03	0.03	0.03	0.03	0.03	0.03	0.639259	7.74e-06	0.000303852	0.0590123	0.349136	-1.51814	10.8326	3.43731	1082	1027	342.333	pmb:A9601_17121	fusA; elongation factor G (EC:3.6.5.3); K02355 elongation factor G		K02355	elongation factor G			0003924||0005525	A2BT84					A9601_17121-NC_008816	97	fusA; elongation factor G (EC:3.6.5.3); K02355 elongation factor G	CAM_CRCL_225	Prochlorococcus marinus str. AS9601
contig_1646057_1_727_+	0.03	0.03	0.03	0.03	0.03	0.03	0.03	0.03	0.03	0.03	0.03	0.03	0.03	0.03	0.03	0.03	0.03	0.03	0.03	0.03	0.890672	7.74e-06	0.000303852	0.0709844	0.480828	-1.05641	12.5474	3.64932	727	727	242.333	pmg:P9301_04761	groEL; chaperonin GroEL (EC:3.6.4.9); K04077 chaperonin GroEL	pmg03018	K04077	chaperonin GroEL	RNA degradation || Longevity regulating pathway - worm || Type I diabetes mellitus || Legionellosis || Tuberculosis		0005524||0044267	A3PBH4					P9301_04761-NC_009091	93	groEL; chaperonin GroEL (EC:3.6.4.9); K04077 chaperonin GroEL	CAM_CRCL_36	Prochlorococcus marinus str. MIT 9301
contig_1665705_1_314_+	0.03	0.03	0.03	0.03	0.03	0.03	0.03	0.03	0.03	0.03	0.03	0.03	0.03	0.03	0.03	0.03	0.03	0.03	0.03	0.03	1.02635	7.74e-06	0.000303852	0.0774453	0.551898	-0.857525	13.2526	3.7282	428	314	104.667	vha:VIBHAR_02160	hypothetical protein						16020	A7MVU3					CAMPEP_0200769052-CAMNT_0046922091	54	PF01036.13: Bacteriorhodopsin-like protein		Karlodinium micrum, Strain CCMP2283
contig_1686273_1115_1614_+	0.03	0.03	0.03	0.03	0.03	0.03	0.03	0.03	0.03	0.03	0.03	0.03	0.03	0.03	0.03	0.03	0.03	0.03	0.03	0.03	0.655709	7.74e-06	0.000303852	0.0597957	0.357752	-1.48297	10.9658	3.45494	1615	500	166.667	apt:APA01_17870	groEL; chaperonin GroEL; K04077 chaperonin GroEL	apt03018	K04077	chaperonin GroEL	RNA degradation || Longevity regulating pathway - worm || Type I diabetes mellitus || Legionellosis || Tuberculosis		0005524||0044267	Q8GBD2					SinteDRAFT_00056090-SinteDRAFT_scaffold_67.68	79	chaperonin GroL		Sinorhizobium terangae WSM1721
contig_1698284_118_1050_+	0.03	0.03	0.03	0.03	0.03	0.03	0.03	0.03	0.03	0.03	0.03	0.03	0.03	0.03	0.03	0.03	0.03	0.03	0.03	0.03	0.365321	7.74e-06	0.000303852	0.0459677	0.205644	-2.28178	7.94735	2.99047	1413	933	311	pmh:P9215_11641	lraI; ABC transporter substrate-binding protein; K02077 zinc/manganese transport system substrate-binding protein		K02077	zinc/manganese transport system substrate-binding protein			0030001||0046872	A8G598					P9215_11641-NC_009840	80	lraI; ABC transporter substrate-binding protein; K02077 zinc/manganese transport system substrate-binding protein	CAM_CRCL_4020527	Prochlorococcus marinus str. MIT 9215
contig_1713954_596_1541_-	0.03	0.03	0.03	0.03	0.03	0.03	0.03	0.03	0.03	0.03	0.03	0.03	0.03	0.03	0.03	0.03	0.03	0.03	0.03	0.03	0.691426	7.74e-06	0.000303852	0.0614965	0.376461	-1.40943	11.2433	3.491	1542	946	315.333	tps:THAPSDRAFT_21815	AMS1; probable S-adenosylmethionine synthetase; K00789 S-adenosylmethionine synthetase [EC:2.5.1.6]	tps01100||tps01110||tps00270	K00789	S-adenosylmethionine synthetase [EC:2.5.1.6]	Cysteine and methionine metabolism || Biosynthesis of amino acids	2.5.1.6	0004478||0006556	B8BY55					CAMPEP_0191819610-CAMNT_0035879471	71	TIGR01034: metK: methionine adenosyltransferase PF02773.11: S-adenosylmethionine synthetase, C-terminal domain PF02772.11: S-adenosylmethionine synthetase, central domain		Scrippsiella hangoei SHTV5
contig_1726098_216_691_+	0.03	0.03	0.03	0.03	0.03	0.03	0.03	0.03	0.03	0.03	0.03	0.03	0.03	0.03	0.03	0.03	0.03	0.03	0.03	0.03	1.34451	7.74e-06	0.000303852	0.0925959	0.718555	-0.476829	14.5202	3.85999	691	476	158.667	rec:RHECIAT_CH0001326	groEL; chaperonin GroEL; K04077 chaperonin GroEL	rec03018	K04077	chaperonin GroEL	RNA degradation || Longevity regulating pathway - worm || Type I diabetes mellitus || Legionellosis || Tuberculosis		0005524||0044267	B3PU03					RHECIAT_CH0001326-NC_010994	82	groEL; chaperonin GroEL; K04077 chaperonin GroEL	CAM_CRCL_36	Rhizobium etli CIAT 652
contig_1729688_1_921_+	0.03	0.03	0.03	0.03	0.03	0.03	0.03	0.03	0.03	0.03	0.03	0.03	0.03	0.03	0.03	0.03	0.03	0.03	0.03	0.03	0.36969	7.74e-06	0.000303852	0.0461757	0.207933	-2.26581	8.00616	3.00111	921	921	307	pmt:PMT1205	rbcL, cbbL; ribulose bisophosphate carboxylase (EC:4.1.1.39); K01601 ribulose-bisphosphate carboxylase large chain [EC:4.1.1.39]	pmt01120||pmt00710||pmt00630||pmt01100	K01601	ribulose-bisphosphate carboxylase large chain [EC:4.1.1.39]	Glyoxylate and dicarboxylate metabolism || Carbon fixation in photosynthetic organisms || Carbon metabolism	4.1.1.39	0000287||0016984	Q7V6F8					PMT1205-NC_005071	95	rbcL, cbbL; ribulose bisophosphate carboxylase (EC:4.1.1.39); K01601 ribulose-bisphosphate carboxylase large chain [EC:4.1.1.39]	CAM_CRCL_32403458	Prochlorococcus marinus str. MIT 9313
contig_1773517_1_738_+	0.03	0.03	0.03	0.03	0.03	0.03	0.03	0.03	0.03	0.03	0.03	0.03	0.03	0.03	0.03	0.03	0.03	0.03	0.03	0.03	0.453922	7.74e-06	0.000303852	0.0501868	0.252054	-1.98819	9.04466	3.17707	3882	738	246	rci:RCIX2030	atpA; A(1)A(0)-type ATP synthase, subunit A (EC:3.6.3.14); K02117 V-type H+-transporting ATPase subunit A [EC:3.6.3.14]	rci00680||rci00190||rci01100	K02117	V/A-type H+-transporting ATPase subunit A [EC:3.6.3.14]	Oxidative phosphorylation	3.6.3.14	5524	Q0W363					Mzhil_1479-Sent_unknown	69	ATP synthase, A subunit	CAM_CRCL_2661	Methanosalsum zhilinae DSM 4017
contig_1784973_2122_4702_+	0.03	0.03	0.03	0.03	0.03	0.03	0.03	0.03	0.03	0.03	0.03	0.03	0.03	0.03	0.03	0.03	0.03	0.03	0.03	0.03	0.151214	7.74e-06	0.000303852	0.0357721	0.0934933	-3.41899	4.22716	2.07969	8160	2581	860.333	cat:CA2559_05670	outer membrane protein						0004872||0006810||0016020	A3U7K6					CA2559_05670-NC_014230	50	outer membrane protein	CAM_CRCL_32327646	Croceibacter atlanticus HTCC2559
contig_1791917_1518_2027_+	0.03	0.03	0.03	0.03	0.03	0.03	0.03	0.03	0.03	0.03	0.03	0.03	0.03	0.03	0.03	0.03	0.03	0.03	0.03	0.03	0.64344	7.74e-06	0.000303852	0.0592114	0.351326	-1.50912	10.8668	3.44186	2593	510	170	dly:Dehly_1200	ATPase AAA-2 domain-containing protein; K03696 ATP-dependent Clp protease ATP-binding subunit ClpC		K03696	ATP-dependent Clp protease ATP-binding subunit ClpC			19538	D8K1L4					Krac_11273-NZ_ADVG01000001	78	ATPase AAA-2 domain protein	CAM_CRCL_4006083	Ktedonobacter racemifer
contig_1798862_1_284_+	0.03	0.03	0.03	0.03	0.03	0.03	0.03	0.03	0.03	0.03	0.03	0.03	0.03	0.03	0.03	0.03	0.03	0.03	0.03	0.03	1.1316	7.74e-06	0.000303852	0.0824571	0.607029	-0.720164	13.7235	3.77858	334	284	94.6667	cpe:CPE2289	groEL; chaperonin GroEL; K04077 chaperonin GroEL	cpe03018	K04077	chaperonin GroEL	RNA degradation || Longevity regulating pathway - worm || Type I diabetes mellitus || Legionellosis || Tuberculosis		0005524||0044267	P26821					or2814-POR4E_contig00324standard	87	chaperonin GroL		Poribacteria WGA-4E
contig_1802916_1_666_+	0.03	0.03	0.03	0.03	0.03	0.03	0.03	0.03	0.03	0.03	0.03	0.03	0.03	0.03	0.03	0.03	0.03	0.03	0.03	0.03	0.499751	7.74e-06	0.000303852	0.0523691	0.27606	-1.85695	9.54286	3.25442	666	666	222	sme:SM_b20144	putative ABC transporter oligopeptide-binding protein; K02035 peptide/nickel transport system substrate-binding protein	sme02010	K02035	peptide/nickel transport system substrate-binding protein				Q92X18					SM2011_b20144-NC_020560	30	Putative glycolic acid ABC transporter,periplasmic solute-binding protein	CAM_CRCL_28084	Sinorhizobium meliloti 2011
contig_1834249_1_773_-	0.03	0.03	0.03	0.03	0.03	0.03	0.03	0.03	0.03	0.03	0.03	0.03	0.03	0.03	0.03	0.03	0.03	0.03	0.03	0.03	0.434728	7.74e-06	0.000303852	0.0492727	0.242	-2.04692	8.82288	3.14125	773	773	257.667								0005198||0009288||0071973						gi489447245-NZ_JH414740	38	flagellin		Bacillus smithii 7_3_47FAA
contig_1855949_1_851_-	0.03	0.03	0.03	0.03	0.03	0.03	0.03	0.03	0.03	0.03	0.03	0.03	0.03	0.03	0.03	0.03	0.03	0.03	0.03	0.03	0.397631	7.74e-06	0.000303852	0.0475063	0.222569	-2.16768	8.37009	3.06524	986	851	283.667	geo:Geob_0449	F0F1 ATP synthase subunit alpha (EC:3.6.3.14); K02111 F-type H+-transporting ATPase subunit alpha [EC:3.6.3.14]	geo01100||geo00190	K02111	F-type H+-transporting ATPase subunit alpha [EC:3.6.3.14]	Oxidative phosphorylation || Photosynthesis	3.6.3.14	0005524||0015992||0046034	B9LZ86					or0032-POR4E_contig00324standard	85	ATP synthase F1 subcomplex alpha subunit		Poribacteria WGA-4E
contig_1882869_1_902_-	0.03	0.03	0.03	0.03	0.03	0.03	0.03	0.03	0.03	0.03	0.03	0.03	0.03	0.03	0.03	0.03	0.03	0.03	0.03	0.03	0.376845	7.74e-06	0.000303852	0.0465164	0.211681	-2.24004	8.10133	3.01816	1455	902	300.667														gi255929027-NC_013085	83	major capsid protein	CAM_CRCL_625	Synechococcus phage S-RSM4
contig_1967343_1_1048_+	0.03	0.03	0.03	0.03	0.03	0.03	0.03	0.03	0.03	0.03	0.03	0.03	0.03	0.03	0.03	0.03	0.03	0.03	0.03	0.03	0.62705	7.74e-06	0.000303852	0.058431	0.342741	-1.54481	10.7315	3.42378	1216	1048	349.333	nhl:Nhal_2336	flagellin domain protein; K02406 flagellin	nhl02020||nhl02040	K02406	flagellin	Two-component system || Flagellar assembly || Plant-pathogen interaction || Salmonella infection || Legionellosis		0005198||0006928||0009288||0044781||0071973	D5BV74					Nhal_2336-NC_013960	46	flagellin domain protein; K02406 flagellin	CAM_CRCL_34374	Nitrosococcus halophilus Nc4
contig_1996909_143_538_-	0.03	0.03	0.03	0.03	0.03	0.03	0.03	0.03	0.03	0.03	0.03	0.03	0.03	0.03	0.03	0.03	0.03	0.03	0.03	0.03	0.820036	7.74e-06	0.000303852	0.0676208	0.443829	-1.17193	12.127	3.60015	538	396	132														CAMPEP_0170485872-CAMNT_0010759655	72			Strombidium inclinatum
contig_2000875_1_781_-	0.03	0.03	0.03	0.03	0.03	0.03	0.03	0.03	0.03	0.03	0.03	0.03	0.03	0.03	0.03	0.03	0.03	0.03	0.03	0.03	0.430582	7.74e-06	0.000303852	0.0490753	0.239829	-2.05992	8.7739	3.13322	1147	781	260.333	rba:RB10629	groEL; heat shock protein GroEL; K04077 chaperonin GroEL	rba03018	K04077	chaperonin GroEL	RNA degradation || Longevity regulating pathway - worm || Type I diabetes mellitus || Legionellosis || Tuberculosis		0005524||0044267	Q7TTY9					Psta_3731-NC_013720	84	chaperonin GroEL	CAM_CRCL_32430158	Pirellula staleyi DSM 6068
contig_2038636_1_943_+	0.03	0.03	0.03	0.03	0.03	0.03	0.03	0.03	0.03	0.03	0.03	0.03	0.03	0.03	0.03	0.03	0.03	0.03	0.03	0.03	0.361765	7.74e-06	0.000303852	0.0457983	0.203782	-2.2949	7.89909	2.98169	2534	943	314.333	axy:AXYL_01731 || axy:AXYL_04955	electron transfer flavoprotein subunit alpha 1; K03522 electron transfer flavoprotein alpha subunit || electron transfer flavoprotein subunit alpha 2		K03522	electron transfer flavoprotein alpha subunit				E3HMN6					gi149927084-NZ_ABCT01000007	93	electron transfer flavoprotein FAD-binding domain	CAM_CRCL_4010769	Limnobacter MED105
contig_2045754_675_1022_+	0.03	0.03	0.03	0.03	0.03	0.03	0.03	0.03	0.03	0.03	0.03	0.03	0.03	0.03	0.03	0.03	0.03	0.03	0.03	0.03	0.929007	7.74e-06	0.000303852	0.0728099	0.500908	-0.997381	12.7594	3.67348	10735	348	116	tgr:Tgr7_0399	hypothetical protein							B8GUY6					Tgr7_0399-NC_011901	36	hypothetical protein	CAM_CRCL_4049388	Thioalkalivibrio sulfidophilus HL-EbGr7
contig_2053521_246_557_+	0.03	0.03	0.03	0.03	0.03	0.03	0.03	0.03	0.03	0.03	0.03	0.03	0.03	0.03	0.03	0.03	0.03	0.03	0.03	0.03	2.03548	7.74e-06	0.000303852	0.125499	1.08049	0.111683	16.2191	4.01962	750	312	104	pmc:P9515_16161	groES; co-chaperonin GroES; K04078 chaperonin GroES		K04078	chaperonin GroES			0005737||0006457	A2BYG2					P9515_16161-NC_008817	100	groES; co-chaperonin GroES; K04078 chaperonin GroES	CAM_CRCL_560	Prochlorococcus marinus str. MIT 9515
contig_2054541_233_970_-	0.03	0.03	0.03	0.03	0.03	0.03	0.03	0.03	0.03	0.03	0.03	0.03	0.03	0.03	0.03	0.03	0.03	0.03	0.03	0.03	0.877844	7.74e-06	0.000303852	0.0703735	0.474109	-1.07671	12.4741	3.64086	1160	738	246	cpc:Cpar_0175	elongation factor Tu; K02358 elongation factor Tu		K02358	elongation factor Tu			5525	P42473					Calab_2111-Contig118	73	translation elongation factor Tu		Caldithrix abyssi DSM 13497
contig_2082181_1_757_+	0.03	0.03	0.03	0.03	0.03	0.03	0.03	0.03	0.03	0.03	0.03	0.03	0.03	0.03	0.03	0.03	0.03	0.03	0.03	0.03	1.26985	7.74e-06	0.000303852	0.0890403	0.679443	-0.557576	14.2615	3.83405	757	757	252.333	pmn:PMN2A_0173 || pme:NATL1_08051	glpX; fructose 1,6-bisphosphatase II (EC:3.1.3.11 3.1.3.37); K11532 fructose-1,6-bisphosphatase II / sedoheptulose-1,7-bisphosphatase [EC:3.1.3.11 3.1.3.37] || glpX; fructose 1,6-bisphosphatase II (EC:3.1.3.11); K11532 fructose-1,6-bisphosphatase II / sedoheptulose-1,7-bisphosphatase [EC:3.1.3.11 3.1.3.37]	pme00010||pme01110||pme01100||pme00710||pme00051||pme01120||pme00030	K11532	fructose-1,6-bisphosphatase II / sedoheptulose-1,7-bisphosphatase [EC:3.1.3.11 3.1.3.37]	Glycolysis / Gluconeogenesis || Pentose phosphate pathway || Fructose and mannose metabolism || Methane metabolism || Carbon fixation in photosynthetic organisms || Carbon metabolism	3.1.3.11||3.1.3.37	0006071||0006094||0042132||0050278	A2C1K3					NATL1_08051-NC_008819	99	glpX; fructose 1,6-bisphosphatase II (EC:3.1.3.11); K11532 fructose-1,6-bisphosphatase II / sedoheptulose-1,7-bisphosphatase [EC:3.1.3.11 3.1.3.37]	CAM_CRCL_33115150	Prochlorococcus marinus str. NATL1A
contig_2095032_247_562_+	0.03	0.03	0.03	0.03	0.03	0.03	0.03	0.03	0.03	0.03	0.03	0.03	0.03	0.03	0.03	0.03	0.03	0.03	0.03	0.03	1.02005	7.74e-06	0.000303852	0.077145	0.548595	-0.866186	13.2224	3.72492	562	316	105.333	pmb:A9601_01591	RNA recognition motif-containing protein						3676	A2BNT6	KOG0108	mRNA cleavage and polyadenylation factor I complex, subunit RNA15	RNA processing and modification	INFORMATION STORAGE AND PROCESSING	A9601_01591-NC_008816	98	RNA recognition motif-containing protein	CAM_CRCL_9108	Prochlorococcus marinus str. AS9601
contig_2114659_1_928_-	0.03	0.03	0.03	0.03	0.03	0.03	0.03	0.03	0.03	0.03	0.03	0.03	0.03	0.03	0.03	0.03	0.03	0.03	0.03	0.03	0.367128	7.74e-06	0.000303852	0.0460537	0.206591	-2.27515	7.97173	2.99489	928	928	309.333														KSU1_B0536-GCA_000296795.1_BAFH01000002	28	conserved hypothetical protein		planctomycete KSU-1
contig_230587_1_444_+	0.03	0.03	0.03	0.03	0.03	0.03	0.03	0.03	0.03	0.03	0.03	0.03	0.03	0.03	0.03	0.03	0.03	0.03	0.03	0.03	0.734627	7.74e-06	0.000303852	0.0635537	0.39909	-1.32521	11.5592	3.53096	444	444	148	pmb:A9601_17121	fusA; elongation factor G (EC:3.6.5.3); K02355 elongation factor G		K02355	elongation factor G			0003924||0005525	A2BT84					A9601_17121-NC_008816	89	fusA; elongation factor G (EC:3.6.5.3); K02355 elongation factor G	CAM_CRCL_225	Prochlorococcus marinus str. AS9601
contig_303627_410_953_+	0.03	0.03	0.03	0.03	0.03	0.03	0.03	0.03	0.03	0.03	0.03	0.03	0.03	0.03	0.03	0.03	0.03	0.03	0.03	0.03	0.6051	7.74e-06	0.000303852	0.0573857	0.331243	-1.59404	10.5444	3.39841	953	544	181.333	nhl:Nhal_2336	flagellin domain protein; K02406 flagellin	nhl02020||nhl02040	K02406	flagellin	Two-component system || Flagellar assembly || Plant-pathogen interaction || Salmonella infection || Legionellosis		0006928||0009288||0044781	D5BV74					Saut_0131-NC_014506	35	flagellin domain-containing protein	CAM_CRCL_3764	Sulfurimonas autotrophica DSM 16294
contig_307411_1_736_-	0.03	0.03	0.03	0.03	0.03	0.03	0.03	0.03	0.03	0.03	0.03	0.03	0.03	0.03	0.03	0.03	0.03	0.03	0.03	0.03	0.455074	7.74e-06	0.000303852	0.0502416	0.252658	-1.98474	9.05771	3.17915	736	736	245.333	pmm:PMM0483	hemL; glutamate-1-semialdehyde aminotransferase (EC:5.4.3.8); K01845 glutamate-1-semialdehyde 2,1-aminomutase [EC:5.4.3.8]	pmm00860||pmm01100||pmm01110	K01845	glutamate-1-semialdehyde 2,1-aminomutase [EC:5.4.3.8]	Porphyrin and chlorophyll metabolism	5.4.3.8	0008483||0030170||0042286	Q7V2J3					PMM0483-NC_005072	90	hemL; glutamate-1-semialdehyde aminotransferase (EC:5.4.3.8); K01845 glutamate-1-semialdehyde 2,1-aminomutase [EC:5.4.3.8]	CAM_CRCL_32368338	Prochlorococcus marinus subsp. pastoris str. CCMP1986
contig_315211_393_704_+	0.03	0.03	0.03	0.03	0.03	0.03	0.03	0.03	0.03	0.03	0.03	0.03	0.03	0.03	0.03	0.03	0.03	0.03	0.03	0.03	1.03274	7.74e-06	0.000303852	0.0777494	0.555244	-0.848806	13.2829	3.7315	748	312	104	cre:CHLREDRAFT_796	HFO43; histone H4; K11254 histone H4		K11254	histone H4	Alcoholism || Viral carcinogenesis || Systemic lupus erythematosus		3677	A8JIN9	KOG3467	Histone H4	Chromatin structure and dynamics	INFORMATION STORAGE AND PROCESSING	CAMPEP_0118998426-CAMNT_0006949919	98	PF00125.19: Core histone H2A/H2B/H3/H4		Rhizochromulina marina
contig_322458_335_895_-	0.03	0.03	0.03	0.03	0.03	0.03	0.03	0.03	0.03	0.03	0.03	0.03	0.03	0.03	0.03	0.03	0.03	0.03	0.03	0.03	0.587673	7.74e-06	0.000303852	0.0565558	0.322114	-1.63436	10.391	3.37726	1424	561	187								0016051||0016840						contig_24119_2_899-pg1871	96		CAM_CRCL_13843	Phaeocystis antarctica, Strain CCMP1374
contig_345143_1_331_-	0.03	0.03	0.03	0.03	0.03	0.03	0.03	0.03	0.03	0.03	0.03	0.03	0.03	0.03	0.03	0.03	0.03	0.03	0.03	0.03	1.92036	7.74e-06	0.000303852	0.120017	1.02019	0.028835	16.0007	4.00006	331	331	110.333	apb:SAR116_2060	TRAP dicarboxylate transporter subunit DctP (EC:3.2.1.114)							D5BNB0					SAR116_2060-NC_014010	67	TRAP dicarboxylate transporter subunit DctP (EC:3.2.1.114)	CAM_CRCL_2967	Puniceispirillum marinum IMCC1322
contig_353111_1_841_+	0.03	0.03	0.03	0.03	0.03	0.03	0.03	0.03	0.03	0.03	0.03	0.03	0.03	0.03	0.03	0.03	0.03	0.03	0.03	0.03	0.402003	7.74e-06	0.000303852	0.0477144	0.224859	-2.15291	8.42519	3.07471	841	841	280.333	pmi:PMT9312_1601	fusA; elongation factor G; K02355 elongation factor G		K02355	elongation factor G			5525	Q318N4					PMT9312_1601-NC_007577	99	fusA; elongation factor G; K02355 elongation factor G	CAM_CRCL_32337882	Prochlorococcus marinus str. MIT 9312
contig_375181_122_483_-	0.03	0.03	0.03	0.03	0.03	0.03	0.03	0.03	0.03	0.03	0.03	0.03	0.03	0.03	0.03	0.03	0.03	0.03	0.03	0.03	0.894239	7.74e-06	0.000303852	0.0711542	0.482696	-1.05081	12.5676	3.65164	483	362	120.667	pmh:P9215_12111	petH; ferredoxin-NADP oxidoreductase (FNR); K02641 ferredoxin--NADP+ reductase [EC:1.18.1.2]	pmh01100||pmh00195	K02641	ferredoxin--NADP+ reductase [EC:1.18.1.2]	Photosynthesis	1.18.1.2	0004324||0016491||0055114	A8G5E5					P9215_12111-NC_009840	94	petH; ferredoxin-NADP oxidoreductase (FNR); K02641 ferredoxin--NADP+ reductase [EC:1.18.1.2]	CAM_CRCL_4027	Prochlorococcus marinus str. MIT 9215
contig_39934_1_759_-	0.03	0.03	0.03	0.03	0.03	0.03	0.03	0.03	0.03	0.03	0.03	0.03	0.03	0.03	0.03	0.03	0.03	0.03	0.03	0.03	0.442193	7.74e-06	0.000303852	0.0496282	0.245911	-2.02379	8.91011	3.15544	1051	759	253	sit:TM1040_0597	groEL; chaperonin GroEL; K04077 chaperonin GroEL	sit03018	K04077	chaperonin GroEL	RNA degradation || Longevity regulating pathway - worm || Type I diabetes mellitus || Legionellosis || Tuberculosis		0005524||0044267	Q1GJ36					SL1157_1988-NZ_GG704596	92	chaperonin GroL	CAM_CRCL_36	Silicibacter lacuscaerulensis ITI-1157
contig_41744_1089_1304_-	0.03	0.03	0.03	0.03	0.03	0.03	0.03	0.03	0.03	0.03	0.03	0.03	0.03	0.03	0.03	0.03	0.03	0.03	0.03	0.03	2.9268	7.74e-06	0.000303852	0.167943	1.54737	0.62982	17.4274	4.12328	1305	216	72	cyt:cce_2908	apcA; allophycocyanin alpha subunit; K02092 allophycocyanin alpha subunit	cyt00196||cyt01100	K02092	allophycocyanin alpha subunit	Photosynthesis - antenna proteins		0015979||0030089	B1WV59					gi67922066-NZ_AADV02000006	82	Phycobilisome protein	CAM_CRCL_3178	Crocosphaera watsonii WH 8501
contig_41745_1_292_-	0.03	0.03	0.03	0.03	0.03	0.03	0.03	0.03	0.03	0.03	0.03	0.03	0.03	0.03	0.03	0.03	0.03	0.03	0.03	0.03	1.10142	7.74e-06	0.000303852	0.08102	0.59122	-0.758234	13.5944	3.76494	349	292	97.3333	cyt:cce_2908	apcA; allophycocyanin alpha subunit; K02092 allophycocyanin alpha subunit	cyt00196||cyt01100	K02092	allophycocyanin alpha subunit	Photosynthesis - antenna proteins		0015979||0030089	B1WV59					gi67922066-NZ_AADV02000006	100	Phycobilisome protein	CAM_CRCL_3178	Crocosphaera watsonii WH 8501
contig_427928_18_344_-	0.03	0.03	0.03	0.03	0.03	0.03	0.03	0.03	0.03	0.03	0.03	0.03	0.03	0.03	0.03	0.03	0.03	0.03	0.03	0.03	0.986741	7.74e-06	0.000303852	0.0755591	0.53115	-0.912808	13.0592	3.70699	726	327	109	pna:Pnap_4541	heavy metal transport/detoxification protein						0030001||0046872	A1VVY6					Pnap_4541-NC_008758	41	heavy metal transport/detoxification protein	CAM_CRCL_4007900	Polaromonas naphthalenivorans CJ2
contig_428020_1_730_-	0.03	0.03	0.03	0.03	0.03	0.03	0.03	0.03	0.03	0.03	0.03	0.03	0.03	0.03	0.03	0.03	0.03	0.03	0.03	0.03	0.458568	7.74e-06	0.000303852	0.050408	0.254488	-1.97433	9.09712	3.18541	805	730	243.333	tjr:TherJR_2793	flagellin domain protein; K02406 flagellin	tjr02040||tjr02020	K02406	flagellin	Two-component system || Flagellar assembly || Plant-pathogen interaction || Salmonella infection || Legionellosis		0005198||0009288||0071973	D5XCU9					TherJR_2793-NC_014152	37	flagellin domain protein; K02406 flagellin	CAM_CRCL_24713	Thermincola potens JR
contig_432567_1_762_+	0.03	0.03	0.03	0.03	0.03	0.03	0.03	0.03	0.03	0.03	0.03	0.03	0.03	0.03	0.03	0.03	0.03	0.03	0.03	0.03	0.85114	7.74e-06	0.000303852	0.0691019	0.460121	-1.11991	12.3172	3.6226	1102	762	254	pmi:PMT9312_0197	pgk; phosphoglycerate kinase (EC:2.7.2.3); K00927 phosphoglycerate kinase [EC:2.7.2.3]	pmi01100||pmi00710||pmi01120||pmi00010||pmi01110	K00927	phosphoglycerate kinase [EC:2.7.2.3]	Glycolysis / Gluconeogenesis || Carbon fixation in photosynthetic organisms || Carbon metabolism || Biosynthesis of amino acids	2.7.2.3	0004618||0006096	Q31CY6					PMT9312_0197-NC_007577	92	pgk; phosphoglycerate kinase (EC:2.7.2.3); K00927 phosphoglycerate kinase [EC:2.7.2.3]	CAM_CRCL_32379201	Prochlorococcus marinus str. MIT 9312
contig_433057_1_620_-	0.03	0.03	0.03	0.03	0.03	0.03	0.03	0.03	0.03	0.03	0.03	0.03	0.03	0.03	0.03	0.03	0.03	0.03	0.03	0.03	0.534604	7.74e-06	0.000303852	0.0540288	0.294316	-1.76456	9.8948	3.30667	699	620	206.667														CAMPEP_0189159914-CAMNT_0032701909	44	TIGR00958: 3a01208: antigen peptide transporter 2 PF03160.9: Calx-beta domain PF00664.18: ABC transporter transmembrane region		Karenia brevis SP1
contig_452696_1_363_-	0.03	0.03	0.03	0.03	0.03	0.03	0.03	0.03	0.03	0.03	0.03	0.03	0.03	0.03	0.03	0.03	0.03	0.03	0.03	0.03	0.891858	7.74e-06	0.000303852	0.0710409	0.481449	-1.05454	12.5542	3.65009	363	363	121								0016491||0016616||0055114		KOG1494	NAD-dependent malate dehydrogenase	Energy production and conversion	METABOLISM	CAMPEP_0117489042-CAMNT_0005283753	77	TIGR01772: MDH_euk_gproteo: malate dehydrogenase, NAD-dependent PF00056.18: lactate/malate dehydrogenase, NAD binding domain PF02866.13: lactate/malate dehydrogenase, alpha/beta C-terminal domain		Gymnodinium catenatum
contig_472244_169_929_+	0.03	0.03	0.03	0.03	0.03	0.03	0.03	0.03	0.03	0.03	0.03	0.03	0.03	0.03	0.03	0.03	0.03	0.03	0.03	0.03	0.44111	7.74e-06	0.000303852	0.0495766	0.245343	-2.02713	8.89753	3.1534	929	761	253.667								0005524||0006457||0006950||0051082		KOG0019	Molecular chaperone (HSP90 family)	Posttranslational modification, protein turnover, chaperones	CELLULAR PROCESSES AND SIGNALING	CAMPEP_0196834924-CAMNT_0042216957	97	PF00183.13: Hsp90 protein PF13589.1: Histidine kinase-, DNA gyrase B-, and HSP90-like ATPase		Symbiodinium Mf12.5f/clade A3
contig_634510_1_948_+	0.03	0.03	0.03	0.03	0.03	0.03	0.03	0.03	0.03	0.03	0.03	0.03	0.03	0.03	0.03	0.03	0.03	0.03	0.03	0.03	0.360015	7.74e-06	0.000303852	0.045715	0.202865	-2.30141	7.87521	2.97732	948	948	316	pub:SAR11_0316	yjcG; SSF family Na(+)/solute symporter; K14393 cation/acetate symporter		K14393	cation/acetate symporter			0005215||0006810||0016020||0055085	Q4FNV0					HIMB114_1270-NZ_GG704932	82	Na+/solute symporter	CAM_CRCL_1881	alpha proteobacterium HIMB114
contig_659926_5_805_-	0.03	0.03	0.03	0.03	0.03	0.03	0.03	0.03	0.03	0.03	0.03	0.03	0.03	0.03	0.03	0.03	0.03	0.03	0.03	0.03	0.42058	7.74e-06	0.000303852	0.048599	0.234589	-2.09179	8.65408	3.11338	1133	801	267	tet:TTHERM_00558620	Tubulin/FtsZ family, GTPase domain containing protein; K07374 tubulin alpha						3924		KOG1376	Alpha tubulin	Cytoskeleton	CELLULAR PROCESSES AND SIGNALING	CAMPEP_0171056634-CAMNT_0011511587	91	PF00091.20: Tubulin/FtsZ family, GTPase domain PF03953.12: Tubulin C-terminal domain		Gambierdiscus australes
contig_659927_1_913_-	0.03	0.03	0.03	0.03	0.03	0.03	0.03	0.03	0.03	0.03	0.03	0.03	0.03	0.03	0.03	0.03	0.03	0.03	0.03	0.03	0.372666	7.74e-06	0.000303852	0.0463174	0.209492	-2.25503	8.04592	3.00826	2005	913	304.333	lpf:lpl0724	groEL; chaperonin GroEL; K04077 chaperonin GroEL	lpf03018	K04077	chaperonin GroEL	RNA degradation || Longevity regulating pathway - worm || Type I diabetes mellitus || Legionellosis || Tuberculosis		0005524||0044267	Q5WYL2					lpl0724-NC_006369	72	groEL; chaperonin GroEL; K04077 chaperonin GroEL	CAM_CRCL_32875177	Legionella pneumophila str. Lens
contig_666814_141_739_+	0.03	0.03	0.03	0.03	0.03	0.03	0.03	0.03	0.03	0.03	0.03	0.03	0.03	0.03	0.03	0.03	0.03	0.03	0.03	0.03	0.552294	7.74e-06	0.000303852	0.0548712	0.303583	-1.71984	10.0653	3.33132	739	599	199.667														CAMPEP_0171109846-CAMNT_0011571637	28			Gambierdiscus australes
contig_671875_1_547_+	0.03	0.03	0.03	0.03	0.03	0.03	0.03	0.03	0.03	0.03	0.03	0.03	0.03	0.03	0.03	0.03	0.03	0.03	0.03	0.03	1.17389	7.74e-06	0.000303852	0.084471	0.629181	-0.668452	13.897	3.7967	547	547	182.333	apb:SAR116_1897	chaperonin cpn60/TcP-1 (EC:3.6.4.10); K04077 chaperonin GroEL	apb03018	K04077	chaperonin GroEL	RNA degradation || Longevity regulating pathway - worm || Type I diabetes mellitus || Legionellosis || Tuberculosis		0005524||0044267	D5BMU7					HIMB100_00018130-GCA_000238815.2_contig10	80	chaperonin GroL		SAR116 cluster alpha proteobacterium HIMB100
contig_853701_189_758_-	0.03	0.03	0.03	0.03	0.03	0.03	0.03	0.03	0.03	0.03	0.03	0.03	0.03	0.03	0.03	0.03	0.03	0.03	0.03	0.03	0.578867	7.74e-06	0.000303852	0.0561365	0.317502	-1.65516	10.3118	3.36622	984	570	190	cyt:cce_2472	hypothetical protein							B1WRH1					gi67925486-NZ_AADV02000182	90	Beta-Ig-H3/fasciclin	CAM_CRCL_16363	Crocosphaera watsonii WH 8501
contig_856397_1_1630_-	0.03	0.03	0.03	0.03	0.03	0.03	0.03	0.03	0.03	0.03	0.03	0.03	0.03	0.03	0.03	0.03	0.03	0.03	0.03	0.03	0.221935	7.74e-06	0.000303852	0.0391398	0.130537	-2.93746	5.67032	2.50343	2459	1630	543.333								0005515||0005524||0006457||0016887||0044267						PSMK_31900-NC_017080	71	groL; 60 kDa chaperonin		Phycisphaera mikurensis NBRC 102666
contig_89311_271_717_-	0.03	0.03	0.03	0.03	0.03	0.03	0.03	0.03	0.03	0.03	0.03	0.03	0.03	0.03	0.03	0.03	0.03	0.03	0.03	0.03	0.729898	7.74e-06	0.000303852	0.0633285	0.396613	-1.3342	11.5256	3.52677	717	447	149														Oweho_3091-NC_016599	38	30S ribosomal protein S1		Owenweeksia hongkongensis DSM 17368
contig_895848_211_648_+	0.03	0.03	0.03	0.03	0.03	0.03	0.03	0.03	0.03	0.03	0.03	0.03	0.03	0.03	0.03	0.03	0.03	0.03	0.03	0.03	1.45856	7.74e-06	0.000303852	0.0980266	0.778293	-0.361615	14.8792	3.89523	648	438	146	apb:SAR116_2060	TRAP dicarboxylate transporter subunit DctP (EC:3.2.1.114)						0006810||0030288	D5BNB0					gi114769330-NZ_AATR01000001	79	trap dicarboxylate transporter - dctp subunit (mannitol/chloroaromatic compounds)	CAM_CRCL_2967	Rhodobacterales bacterium HTCC2255
contig_965313_1_308_+	0.03	0.03	0.03	0.03	0.03	0.03	0.03	0.03	0.03	0.03	0.03	0.03	0.03	0.03	0.03	0.03	0.03	0.03	0.03	0.03	1.04576	7.74e-06	0.000303852	0.0783696	0.562065	-0.83119	13.344	3.73812	308	308	102.667	pgv:SL003B_1467	L-sorbosone dehydrogenase, putative												gi91762599-NZ_AAPV01000001	77	putative glucose/sorbosone dehydrogenase	CAM_CRCL_33974416	Pelagibacter ubique HTCC1002
contig_630702_1_842_-	0.03	0.03	0.03	0.03	0.03	0.03	0.03	0.03	0.03	0.03	0.03	0.03	0.03	0.03	0.03	0.03	0.179094	0.03	0.03	0.03	1.51624	8.6e-06	0.000333745	0.107873	0.812059	-0.300344	14.0558	3.81309	1493	842	280.667	pmh:P9215_17191	atpA; F0F1 ATP synthase subunit alpha (EC:3.6.3.14); K02111 F-type H+-transporting ATPase subunit alpha [EC:3.6.3.14]	pmh00190||pmh01100||pmh00195	K02111	F-type H+-transporting ATPase subunit alpha [EC:3.6.3.14]	Oxidative phosphorylation || Photosynthesis	3.6.3.14	0005524||0015992||0046034	A8G6V1					gi488894024-NZ_DS999537	99	F0F1 ATP synthase subunit alpha	CAM_CRCL_212	Prochlorococcus marinus str. MIT 9202
contig_2120925_120_921_+	0.03	0.03	0.03	0.03	0.03	0.03	0.03	0.03	0.03	0.03	0.03	0.03	0.03	0.03	0.03	0.03	0.03	0.03	0.03	0.205772	1.20028	9.78e-06	0.000375412	0.0940976	0.647188	-0.627743	12.7557	3.67307	921	802	267.333	cnc:CNE_1c02480	Leu/Ile/Val-binding protein 5; K01999 branched-chain amino acid transport system substrate-binding protein	cnc02010	K01999	branched-chain amino acid transport system substrate-binding protein	ABC transporters								gi159181050-ABHC01000004	70	Leu/Ile/Val-binding protein	CAM_CRCL_5179	alpha proteobacterium BAL199
contig_1214758_216_704_-	0.03	0.03	0.03	0.03	0.03	0.03	0.03	0.03	0.03	0.03	0.03	0.03	0.03	0.03	0.03	0.03	0.03	0.03	0.03	0.89484	5.14827	1.04e-05	0.000387064	0.31491	2.73159	1.44974	16.3484	4.03108	1877	489	163	cyc:PCC7424_0160	phycocyanin, subunit alpha; K02284 phycocyanin alpha chain	cyc00196||cyc01100	K02284	phycocyanin alpha chain	Photosynthesis - antenna proteins		0009055||0015979||0030076||0030089	B7K9E7					gi67923119-NZ_AADV02000031	99	Phycocyanin alpha subunit	CAM_CRCL_3331	Crocosphaera watsonii WH 8501
contig_1850381_1_758_-	0.03	0.03	0.03	0.03	0.03	0.03	0.03	0.03	0.03	0.03	0.03	0.03	0.03	0.03	0.232227	0.03	0.03	0.03	0.03	0.03	1.26821	1.02e-05	0.000387064	0.0985922	0.683401	-0.549195	12.8632	3.68518	1258	758	252.667	pmi:PMT9312_1578	rpoB; DNA-directed RNA polymerase subunit beta (EC:2.7.7.6); K03043 DNA-directed RNA polymerase subunit beta [EC:2.7.7.6]	pmi01100||pmi00240||pmi00230||pmi03020	K03043	DNA-directed RNA polymerase subunit beta [EC:2.7.7.6]	Purine metabolism || Pyrimidine metabolism || RNA polymerase	2.7.7.6	0003677||0003899||0006351	Q318Q7					PMT9312_1578-NC_007577	96	rpoB; DNA-directed RNA polymerase subunit beta (EC:2.7.7.6); K03043 DNA-directed RNA polymerase subunit beta [EC:2.7.7.6]	CAM_CRCL_32326554	Prochlorococcus marinus str. MIT 9312
contig_932324_133_822_+	0.03	0.03	0.03	0.03	0.03	0.03	0.03	0.03	0.03	0.03	0.03	0.03	0.03	0.03	0.03	0.03	0.03	0.03	0.365038	0.234303	2.29706	1.04e-05	0.000387064	0.163638	1.23035	0.299068	14.0374	3.81121	1435	690	230	pmn:PMN2A_1581	putative sulfate transporter; K03321 sulfate permease, SulP family		K03321	sulfate permease, SulP family			0008272||0015116||0016021	Q46HF9					PMN2A_1581-NC_007335	92	putative sulfate transporter; K03321 sulfate permease, SulP family	CAM_CRCL_32641204	Prochlorococcus marinus str. NATL2A
contig_400172_1_536_+	0.03	0.03	0.03	0.03	0.03	0.03	0.03	0.03	0.03	0.03	0.03	0.03	0.03	0.03	0.03	0.03	0.03	0.03	0.461299	0.03	2.36473	1.1e-05	0.000404275	0.161716	1.26323	0.337112	14.6228	3.87014	536	536	178.667	apb:SAR116_1844	F1-ATP synthase subunit beta (EC:3.6.3.14); K02112 F-type H+-transporting ATPase subunit beta [EC:3.6.3.14]	apb00190||apb01100	K02112	F-type H+-transporting ATPase subunit beta [EC:3.6.3.14]	Oxidative phosphorylation || Photosynthesis	3.6.3.14	0005524||0015992||0046034	D5BMP4					SAR116_1844-NC_014010	80	F1-ATP synthase subunit beta (EC:3.6.3.14); K02112 F-type H+-transporting ATPase subunit beta [EC:3.6.3.14]	CAM_CRCL_22	Puniceispirillum marinum IMCC1322
contig_1298910_1_565_-	0.03	0.03	0.03	0.03	0.03	0.03	0.03	0.03	0.03	0.03	0.03	0.03	0.03	0.03	0.03	0.03	0.03	0.03	0.03	0.279502	1.13745	1.3e-05	0.00047172	0.0946167	0.616033	-0.698921	12.0216	3.58756	939	565	188.333	pmg:P9301_08861	putative UreA ABC transporter, substrate binding protein; K11959 urea transport system substrate-binding protein	pmg02010	K11959	urea transport system substrate-binding protein	ABC transporters			A3PCN4					P9301_08861-NC_009091	100	putative UreA ABC transporter, substrate binding protein; K11959 urea transport system substrate-binding protein	CAM_CRCL_10155	Prochlorococcus marinus str. MIT 9301
contig_1394102_1_567_+	1.59372	0.03	0.03	0.437515	1.0294	0.03	0.03	0.03	0.712966	0.695356	0.707753	1.21822	0.459884	0.38719	0.30035	0.296979	1.35844	0.931573	1.25315	0.527245	9.41011	1.43e-05	0.000515212	1.02237	5.21624	2.38301	9.20418	3.20229	597	567	189														HIMB5_00006000-NC_018643	96	amino acid ABC transporter substrate-binding protein		alpha proteobacterium HIMB5
contig_698348_24_1004_+	0.03	0.03	0.03	0.03	0.03	0.03	0.03	0.03	0.03	0.03	0.03	0.03	0.03	0.03	0.03	0.03	0.157969	0.160273	0.03	0.03	0.667828	1.69e-05	0.000603322	0.07267	0.370249	-1.43343	9.18987	3.20004	1124	981	327	pgv:SL003B_0823	Twin-arginine translocation pathway signal						0006810||0030288						gi126727350-NZ_AAXZ01000009	68	twin-arginine translocation pathway signal	CAM_CRCL_6076	Rhodobacteraceae bacterium HTCC2150
contig_1762314_1_1138_+	0.03	0.03	0.03	0.03	0.195982	0.186305	0.03	0.03	0.03	0.03	0.03	0.03	0.03	0.03	0.03	0.03	0.250628	0.03	0.436285	0.277748	1.6795	2.12e-05	0.000746854	0.165545	0.92252	-0.116347	10.1453	3.34273	1283	1138	379.333	pmt:PMT1205	rbcL, cbbL; ribulose bisophosphate carboxylase (EC:4.1.1.39); K01601 ribulose-bisphosphate carboxylase large chain [EC:4.1.1.39]	pmt01120||pmt00710||pmt00630||pmt01100	K01601	ribulose-bisphosphate carboxylase large chain [EC:4.1.1.39]	Glyoxylate and dicarboxylate metabolism || Carbon fixation in photosynthetic organisms || Carbon metabolism	4.1.1.39	0000287||0015977||0016984	Q7V6F8					PMT1205-NC_005071	95	rbcL, cbbL; ribulose bisophosphate carboxylase (EC:4.1.1.39); K01601 ribulose-bisphosphate carboxylase large chain [EC:4.1.1.39]	CAM_CRCL_32403458	Prochlorococcus marinus str. MIT 9313
contig_1725926_1_610_+	0.03	0.03	0.03	0.03	0.03	0.03	0.03	0.03	0.03	0.03	0.03	0.03	0.03	0.362011	0.03	0.03	0.03	0.03	0.03	0.03	1.05575	2.15e-05	0.000751002	0.0946554	0.575204	-0.797855	11.1536	3.47944	610	610	203.333	nve:NEMVE_v1g197000	hypothetical protein						0016301||0016772	A7RGZ5	KOG3581	Creatine kinases	Energy production and conversion	METABOLISM	CAMPEP_0201567878-CAMNT_0047988365	61	PF00217.14: ATP:guanido phosphotransferase, C-terminal catalytic domain PF02807.10: ATP:guanido phosphotransferase, N-terminal domain		Rosalina sp.
contig_1234039_667_1020_+	0.03	0.03	0.03	0.03	0.03	0.03	0.03	0.03	0.03	0.03	0.03	0.03	0.03	0.03	0.03	0.03	0.03	0.03	0.03	1.22465	3.56508	2.34e-05	0.000808698	0.255225	1.91015	0.933687	13.9684	3.80409	3353	354	118	ter:Tery_0983	phycobilisome protein; K05376 phycoerythrin alpha chain	ter01100||ter00196	K05376	phycoerythrin alpha chain	Photosynthesis - antenna proteins		0015979||0030089	Q117G1					gi67925509-NZ_AADV02000185	67	Phycobilisome protein	CAM_CRCL_3331	Crocosphaera watsonii WH 8501
contig_461906_129_626_+	0.03	0.03	0.03	0.03	0.03	0.03	0.03	0.03	0.03	0.787544	0.03	0.03	0.03	0.03	0.03	0.03	0.282083	0.03	0.494209	0.03	2.54289	2.62e-05	0.000895748	0.219844	1.38137	0.466095	11.5668	3.53192	641	498	166														HIMB5_00009750-NC_018643	78	spermidine/putrescine ABC transporter substrate-binding protein		alpha proteobacterium HIMB5
contig_1722425_1_797_+	0.03	0.03	0.03	0.03	0.03	0.03	0.03	0.03	0.03	0.03	0.03	0.03	0.03	0.03	0.03	0.03	0.03	0.03	0.320058	0.03	0.81508	2.84e-05	0.000943848	0.0811971	0.448139	-1.15798	10.0383	3.32744	847	797	265.667	pme:NATL1_02711	pgk; phosphoglycerate kinase (EC:2.7.2.3); K00927 phosphoglycerate kinase [EC:2.7.2.3]	pme00010||pme01110||pme01100||pme00710||pme01120	K00927	phosphoglycerate kinase [EC:2.7.2.3]	Glycolysis / Gluconeogenesis || Carbon fixation in photosynthetic organisms || Carbon metabolism || Biosynthesis of amino acids	2.7.2.3	0004618||0006096	A2C025					NATL1_02711-NC_008819	95	pgk; phosphoglycerate kinase (EC:2.7.2.3); K00927 phosphoglycerate kinase [EC:2.7.2.3]	CAM_CRCL_47648	Prochlorococcus marinus str. NATL1A
contig_1779916_1_658_-	0.03	0.03	0.03	0.03	0.03	0.03	0.03	0.03	0.03	0.03	0.03	0.03	0.03	0.03	0.03	0.03	0.03	0.03	0.381332	0.03	0.980925	2.84e-05	0.000943848	0.0920122	0.536469	-0.898434	10.6608	3.41425	658	658	219.333	jan:Jann_3358	groEL; chaperonin GroEL; K04077 chaperonin GroEL	jan03018	K04077	chaperonin GroEL	RNA degradation || Longevity regulating pathway - worm || Type I diabetes mellitus || Legionellosis || Tuberculosis		0005524||0044267	Q28LY7					Jann_3358-NC_007802	84	groEL; chaperonin GroEL; K04077 chaperonin GroEL	CAM_CRCL_32430158	Jannaschia CCS1
contig_452030_1_991_+	0.03	0.03	0.03	0.03	0.03	0.03	0.03	0.03	0.03	0.03	0.03	0.03	0.03	0.03	0.03	0.03	0.03	0.03	0.263276	0.03	0.661391	2.84e-05	0.000943848	0.0711746	0.366283	-1.44897	9.29252	3.21607	991	991	330.333								0005524||0044267						HIMB100_00018130-GCA_000238815.2_contig10	71	chaperonin GroL		SAR116 cluster alpha proteobacterium HIMB100
contig_2037835_1_475_-	0.03	0.03	0.03	0.03	0.03	0.03	0.03	0.03	0.03	0.03	0.03	0.03	0.03	0.03	0.352712	0.03	0.03	0.299048	0.03	0.326777	1.34728	2.94e-05	0.000969942	0.135039	0.74116	-0.432142	9.97698	3.3186	4855	475	158.333	vsp:VS_II1387	ABC-type sugar transport system, ATP-binding protein; K10112 maltose/maltodextrin transport system ATP-binding protein	vsp02010	K10112	multiple sugar transport system ATP-binding protein	ABC transporters		0005524||0016887	B7VTD3					gi148975229-NZ_AAZW01000003	98	sugar ABC transportor ATP-binding protein	CAM_CRCL_7743	Vibrionales bacterium SWAT-3
contig_1979556_9_995_-	0.03	0.03	0.03	0.03	0.03	0.03	0.254613	0.03	0.03	0.03	0.03	0.03	0.03	0.03	0.03	0.03	0.03	0.159481	0.03	0.315651	0.980925	3.28e-05	0.00107089	0.105746	0.543336	-0.880084	9.27622	3.21354	1247	987	329	pgv:SL003B_0823	Twin-arginine translocation pathway signal						0006810||0030288						SL003B_0823-NC_015259	66	Twin-arginine translocation pathway signal	CAM_CRCL_6076	Polymorphum gilvum SL003B-26A1
contig_1463830_1_337_+	0.03	0.03	0.03	0.03	0.03	0.03	0.03	0.03	0.03	0.03	0.03	0.03	0.03	0.03	0.03	0.03	0.402514	0.03	0.03	0.03	0.958351	3.48e-05	0.00107168	0.091946	0.525149	-0.929202	10.423	3.3817	601	337	112.333	pmn:PMN2A_1350	glyceraldehyde 3-phosphate dehydrogenase(NADP+)(phosphorylating) (EC:1.2.1.13); K00150 glyceraldehyde-3-phosphate dehydrogenase (NAD(P)) [EC:1.2.1.59]	pmn00010||pmn00710||pmn01120||pmn01110||pmn01100	K00150	glyceraldehyde-3-phosphate dehydrogenase (NAD(P)) [EC:1.2.1.59]	Glycolysis / Gluconeogenesis || Carbon fixation in photosynthetic organisms || Carbon metabolism || Biosynthesis of amino acids	1.2.1.59	0016620||0043891||0055114	Q46I39					PMN2A_1350-NC_007335	97	glyceraldehyde 3-phosphate dehydrogenase(NADP+)(phosphorylating) (EC:1.2.1.13); K00150 glyceraldehyde-3-phosphate dehydrogenase (NAD(P)) [EC:1.2.1.59]	CAM_CRCL_14044390	Prochlorococcus marinus str. NATL2A
contig_1469381_45_809_-	0.03	0.03	0.03	0.03	0.03	0.03	0.03	0.03	0.03	0.03	0.03	0.03	0.03	0.03	0.03	0.03	0.194101	0.03	0.03	0.03	0.43896	3.48e-05	0.00107168	0.0572886	0.248124	-2.01087	7.66226	2.93777	851	765	255	pme:NATL1_14691	two-component response regulator						0000160||0003677||0006355	A2C3G6					NATL1_14691-NC_008819	93	two-component response regulator	CAM_CRCL_4029809	Prochlorococcus marinus str. NATL1A
contig_1539162_1_857_+	0.03	0.03	0.03	0.03	0.03	0.03	0.03	0.03	0.03	0.03	0.03	0.03	0.03	0.03	0.03	0.03	0.176484	0.03	0.03	0.03	0.395058	3.48e-05	0.00107168	0.0543591	0.224708	-2.15387	7.26755	2.86147	857	857	285.667	pmi:PMT9312_0751	FtsH peptidase (EC:3.6.4.6); K03798 cell division protease FtsH [EC:3.4.24.-]		K03798	cell division protease FtsH [EC:3.4.24.-]			0004222||0005524||0008270||0016021	Q31BD4					PMT9312_0751-NC_007577	84	FtsH peptidase (EC:3.6.4.6); K03798 cell division protease FtsH [EC:3.4.24.-]	CAM_CRCL_32340638	Prochlorococcus marinus str. MIT 9312
contig_1704341_1_602_+	0.03	0.03	0.03	0.03	0.03	0.03	0.03	0.03	0.03	0.03	0.03	0.03	0.03	0.03	0.03	0.03	0.238534	0.03	0.03	0.03	0.549692	3.48e-05	0.00107168	0.0646774	0.307185	-1.70282	8.49898	3.08729	613	602	200.667								0005524||0044267						jcvi:NT02SARS1441-Contig_6_sar86_2	67	chaperonin GroL	CAM_CRCL_36	uncultured SAR86 cluster bacterium
contig_1869775_1_1065_+	0.03	0.03	0.03	0.03	0.03	0.03	0.03	0.03	0.03	0.03	0.03	0.03	0.03	0.03	0.03	0.03	0.147875	0.03	0.03	0.03	0.32376	3.48e-05	0.00107168	0.0496017	0.186681	-2.42135	6.5272	2.70646	1482	1065	355	dly:Dehly_1657	tail sheath protein; K06907		K06907	uncharacterized protein				D8K2V7					gi61806001-NC_006883	45	18 tail sheath protein	CAM_CRCL_32412984	Prochlorococcus phage P-SSM2
contig_1939258_107_823_-	0.03	0.03	0.03	0.03	0.03	0.03	0.03	0.03	0.03	0.03	0.03	0.03	0.03	0.03	0.03	0.03	0.205087	0.03	0.03	0.03	0.466338	3.48e-05	0.00107168	0.0591155	0.262727	-1.92836	7.8886	2.97977	2262	717	239														gi61806007-NC_006883	68	23 major capsid protein	CAM_CRCL_32493645	Prochlorococcus phage P-SSM2
contig_233036_455_988_-	0.03	0.03	0.03	0.895398	1.09116	0.696198	0.860309	0.03	0.03	0.03	0.03	0.871099	0.48645	0.788528	0.604113	0.03	1.20544	0.508644	0.03	2.66987	7.64631	3.5e-05	0.00107168	0.885406	4.26586	2.09284	8.63594	3.11035	1968	534	178	ter:Tery_0984	phycobilisome protein; K05377 phycoerythrin beta chain	ter01100||ter00196	K05377	phycoerythrin beta chain	Photosynthesis - antenna proteins		0015979||0030089	Q117G0					Tery_0984-NC_008312	85	phycobilisome protein; K05377 phycoerythrin beta chain	CAM_CRCL_3178	Trichodesmium erythraeum IMS101
contig_1193771_1_1435_-	0.03	0.03	0.03	0.03	0.03	0.03	0.03	0.03	0.03	0.03	0.03	0.03	0.03	0.03	0.03	0.03	0.03	0.119058	0.03	0.03	0.248017	3.65e-05	0.00109031	0.0446226	0.14632	-2.7728	5.5581	2.47459	4690	1435	478.333	gfo:GFO_2847	hypothetical protein							A0M5A6					JoomaDRAFT_2871-GCA_000260115.1_JH651379	66	hypothetical protein		Joostella marina DSM 19592
contig_1411310_1_589_-	0.03	0.03	0.03	0.03	0.03	0.03	0.03	0.03	0.03	0.03	0.03	0.03	0.03	0.03	0.03	0.03	0.03	0.246974	0.03	0.03	0.561162	3.65e-05	0.00109031	0.0656255	0.313394	-1.67395	8.55097	3.09609	694	589	196.333	apb:SAR116_1606	membrane lipoprotein (EC:2.7.1.11); K07335 basic membrane protein A and related proteins		K07335	basic membrane protein A and related proteins			5886	D5BUA2					HIMB100_00016240-GCA_000238815.2_contig10	76	putative ABC-type transport system, periplasmic component/surface lipoprotein		SAR116 cluster alpha proteobacterium HIMB100
contig_426931_1_764_+	0.03	0.03	0.03	0.03	0.03	0.03	0.03	0.03	0.03	0.03	0.03	0.03	0.03	0.03	0.03	0.03	0.03	0.197275	0.03	0.03	0.439495	3.65e-05	0.00109031	0.0574652	0.24848	-2.0088	7.64802	2.93509	783	764	254.667	pae:PA2952 || pau:PA14_25860 || pag:PLES_21111	etfB; electron transfer flavoprotein beta-subunit; K03521 electron transfer flavoprotein beta subunit || etfB; electron transfer flavoprotein beta-subunit; K03521 electron transfer flavoprotein beta subunit || etfB; electron transfer flavoprotein beta-subunit; K03521 electron transfer flavoprotein beta subunit		K03521	electron transfer flavoprotein beta subunit				Q02PB5					gi489181648-NZ_JH376461	87	etfB; electron transfer flavoprotein subunit beta; K03521 electron transfer flavoprotein beta subunit	CAM_CRCL_190	Pseudomonas 2_1_26
contig_1210332_58_999_+	0.03	0.03	0.03	0.03	0.03	0.03	0.03	0.03	0.03	0.03	0.03	0.03	0.03	0.03	0.03	0.03	0.163267	0.03	0.27541	0.03	0.694234	3.8e-05	0.00111449	0.0796624	0.386948	-1.36979	8.7147	3.12345	1618	942	314	tel:tll1706	putative porin; major outer membrane protein							Q8DI84					Osc10802DRAFT_1759-Osc10802DRAFT_Contig9.9	40	Carbohydrate-selective porin, OprB family./S-layer homology domain.		Oscillatoria PCC 10802
contig_1921468_1_965_-	0.03	0.03	0.03	0.03	0.03	0.03	0.03	0.03	0.03	0.03	0.03	0.03	0.03	0.03	0.03	0.03	0.16009	0.03	0.269561	0.03	0.678403	3.8e-05	0.00111449	0.0784788	0.378441	-1.40186	8.64441	3.11177	1137	965	321.667								0003676||0005524		KOG0327	Translation initiation factor 4F, helicase subunit (eIF-4A) and related helicases	Translation, ribosomal structure and biogenesis	INFORMATION STORAGE AND PROCESSING	CAMPEP_0200826704-CAMNT_0046993311	93	TIGR00614: recQ_fam: ATP-dependent DNA helicase, RecQ family PF00270.24: DEAD/DEAH box helicase PF00271.26: Helicase conserved C-terminal domain		Karlodinium micrum, Strain CCMP2283
contig_1228495_307_1060_-	0.03	0.03	0.03	0.03	0.03	0.03	0.03	0.03	0.03	0.03	0.03	0.03	0.03	0.03	0.03	0.03	0.03	0.03	0.03	0.216961	0.444926	4.86e-05	0.00137965	0.0586613	0.251794	-1.98969	7.58466	2.92308	1061	754	251.333	kdi:Krodi_1760	MotA/TolQ/ExbB proton channel; K03561 biopolymer transport protein ExbB		K03561	biopolymer transport protein ExbB			0006810||0008565||0016020						gi86140775-NZ_AANC01000001	74	hypothetical protein	CAM_CRCL_33582155	Leeuwenhoekiella blandensis MED217
contig_1479099_629_901_+	0.03	0.03	0.03	0.03	0.03	0.03	0.03	0.03	0.03	0.03	0.03	0.03	0.03	0.03	0.03	0.03	0.03	0.03	0.03	0.546369	1.17599	4.86e-05	0.00137965	0.10916	0.642573	-0.638067	10.7731	3.42936	990	273	91	pmh:P9215_01791	gltA; citrate synthase (EC:2.3.3.1); K01647 citrate synthase [EC:2.3.3.1]	pmh00630||pmh01100||pmh00020||pmh01120||pmh01110	K01647	citrate synthase [EC:2.3.3.1]	Citrate cycle (TCA cycle) || Glyoxylate and dicarboxylate metabolism || Carbon metabolism || 2-Oxocarboxylic acid metabolism || Biosynthesis of amino acids	2.3.3.1	0004108||0044262||0046912	A8G2G7					P9215_01791-NC_009840	98	gltA; citrate synthase (EC:2.3.3.1); K01647 citrate synthase [EC:2.3.3.1]	CAM_CRCL_4011430	Prochlorococcus marinus str. MIT 9215
contig_330069_452_772_+	0.03	0.03	0.03	0.03	0.03	0.03	0.03	0.03	0.03	0.03	0.03	0.03	0.03	0.03	0.03	0.03	0.03	0.03	0.03	0.469155	1.00462	4.86e-05	0.00137965	0.0973228	0.550974	-0.859945	10.3226	3.36773	817	321	107														Desaci_2999-NC_018068	56	hypothetical protein		Desulfosporosinus acidiphilus SJ4
contig_41744_516_788_-	0.03	0.03	0.03	0.03	0.03	0.03	0.03	0.03	0.03	0.03	0.03	0.03	0.03	0.03	0.03	0.03	0.03	0.03	0.03	0.546369	1.17599	4.86e-05	0.00137965	0.10916	0.642573	-0.638067	10.7731	3.42936	1305	273	91	cyt:cce_2909	apcB; allophycocyanin beta subunit; K02093 allophycocyanin beta subunit	cyt00196||cyt01100	K02093	allophycocyanin beta subunit	Photosynthesis - antenna proteins		0015979||0030089	B1WV60					gi67922067-NZ_AADV02000006	100	Allophycocyanin beta subunit	CAM_CRCL_3178	Crocosphaera watsonii WH 8501
contig_2074469_1_628_+	0.03	0.03	0.03	0.397932	0.330776	0.03	0.03	0.03	0.03	0.03	0.03	0.03	0.03	0.03	0.03	0.03	0.03	0.03	0.03	0.03	1.02635	5.54e-05	0.00155952	0.109289	0.56782	-0.816494	9.39121	3.23131	628	628	209.333	pae:PA4694 || pau:PA14_62130 || pag:PLES_50791	ilvC; ketol-acid reductoisomerase; K00053 ketol-acid reductoisomerase [EC:1.1.1.86] || ilvC; ketol-acid reductoisomerase (EC:1.1.1.86); K00053 ketol-acid reductoisomerase [EC:1.1.1.86] || ilvC; ketol-acid reductoisomerase; K00053 ketol-acid reductoisomerase [EC:1.1.1.86]	pau00770||pau01110||pau01100||pau00290	K00053	ketol-acid reductoisomerase [EC:1.1.1.86]	Valine, leucine and isoleucine biosynthesis || Pantothenate and CoA biosynthesis || 2-Oxocarboxylic acid metabolism || Biosynthesis of amino acids	1.1.1.86	0004455||0008652||0009082||0009097||0009099||0055114	Q02FX9					G655_24750-NC_020912	100	reductoisomerase (EC:1.1.1.86)	CAM_CRCL_488	Pseudomonas aeruginosa B136-33
contig_1279114_1_989_-	0.03	0.03	0.03	0.03	0.03	0.03	0.03	0.03	0.03	0.03	0.03	0.03	0.03	0.03	0.03	0.183061	0.03	0.03	0.03	0.03	0.346334	6.13e-05	0.00171349	0.0523521	0.199343	-2.32667	6.61547	2.72584	1297	989	329.667	sit:TM1040_2988	polyamine ABC trasnporter, periplasmic polyamine-binding protein							Q1GC96					TRICHSKD4_1630-NZ_GL476310	71	polyamine ABC transporter, periplasmic polyamine-binding protein	CAM_CRCL_2606	Roseibium TrichSKD4
contig_1236637_981_1643_-	0.03	0.03	0.03	0.03	0.03	0.03	0.03	0.03	0.03	0.03	0.03	0.03	0.03	0.03	0.261204	0.03	0.03	0.03	0.03	0.03	0.501877	6.41e-05	0.00177511	0.06348	0.282678	-1.82277	7.90606	2.98296	2444	663	221	cyt:cce_1344	groEL; chaperonin GroEL; K04077 chaperonin GroEL	cyt03018	K04077	chaperonin GroEL	RNA degradation || Longevity regulating pathway - worm || Type I diabetes mellitus || Legionellosis || Tuberculosis		0005524||0044267	B1WWH0					gi67925502-NZ_AADV02000184	98	Chaperonin Cpn60/TCP-1	CAM_CRCL_36	Crocosphaera watsonii WH 8501
contig_1255796_2098_3024_+	0.03	0.03	0.03	0.03	0.03	0.03	0.03	0.03	0.03	0.03	0.03	0.03	0.03	0.03	0.03	0.193298	0.03	0.305724	0.03	0.18207	0.704983	7.38e-05	0.00203031	0.0902892	0.397636	-1.33048	7.80805	2.96496	3097	927	309	bja:bll7639	alcohol dehydrogenase (EC:1.1.99.8)							Q89D06					gi496261279-NZ_CAFK01000347	41	alcohol dehydrogenase		Bradyrhizobium STM 3843
contig_506412_202_795_-	0.03	0.03	0.03	0.418992	0.03	0.03	0.03	0.03	0.03	0.03	0.03	0.03	0.03	0.03	0.288061	0.284844	0.03	0.245148	0.03	0.03	1.08338	7.8e-05	0.00212707	0.133354	0.608368	-0.716984	8.12413	3.02221	1312	594	198								0016301||0016772		KOG3581	Creatine kinases	Energy production and conversion	METABOLISM	CAMPEP_0201567878-CAMNT_0047988365	64	PF00217.14: ATP:guanido phosphotransferase, C-terminal catalytic domain PF02807.10: ATP:guanido phosphotransferase, N-terminal domain		Rosalina sp.
contig_1710673_1_797_-	0.03	0.03	0.03	0.03	0.03	0.03	0.03	0.03	0.03	0.03	0.03	0.03	0.03	0.284112	0.222331	0.219934	0.187512	0.03	0.03	0.206874	0.81508	7.91e-05	0.0021419	0.113612	0.464346	-1.10673	7.17427	2.84283	797	797	265.667	rli:RLO149_c027190	groEL; chaperon GroEL; K04077 chaperonin GroEL	rli03018	K04077	chaperonin GroEL	RNA degradation || Longevity regulating pathway - worm || Type I diabetes mellitus || Legionellosis || Tuberculosis		0005524||0044267						gi114769406-NZ_AATR01000001	80	chaperonin GroL	CAM_CRCL_36	Rhodobacterales bacterium HTCC2255
contig_1546689_1_905_-	0.03	0.03	0.03	0.03	0.03	0.03	0.03	0.03	0.03	0.03	0.03	0.278148	0.03	0.03	0.03	0.03	0.168715	0.171213	0.03	0.4973	1.06709	8.25e-05	0.00220024	0.126784	0.596935	-0.744354	8.41658	3.07323	1305	905	301.667														gi159180527-ABHC01000006	49	ABC transporter, substrate-binding protein, family 5	CAM_CRCL_28084	alpha proteobacterium BAL199
contig_1679110_1_211_-	0.03	0.03	0.03	0.03	0.925201	0.03	0.03	0.03	0.03	0.03	0.03	0.03	1.18519	0.03	0.03	0.03	0.03	0.03	0.03	0.698099	2.99544	8.24e-05	0.00220024	0.300663	1.64805	0.720763	9.96279	3.31655	211	211	70.3333	ppp:PHYPADRAFT_110341	hypothetical protein						3924	E1C9W1	KOG1375	Beta tubulin	Cytoskeleton	CELLULAR PROCESSES AND SIGNALING	ac02144-ac	75	beta-tubulin	CAM_CRCL_4007620	Alexandrium catenella, Strain OF101
contig_1435814_1_451_+	0.03	0.03	0.03	0.03	0.03	0.03	0.03	0.03	0.03	0.03	0.03	0.03	0.03	0.03	0.03	0.03	0.308353	0.313366	0.03	0.03	0.72369	0.000109586	0.00287724	0.0897814	0.406736	-1.29784	8.06058	3.01088	1179	451	150.333	pmg:P9301_00221	gap2; glyceraldehyde 3-phosphate dehydrogenase(NADP+)(phosphorylating) (EC:1.2.1.13 1.2.1.12); K00150 glyceraldehyde-3-phosphate dehydrogenase (NAD(P)) [EC:1.2.1.59]	pmg01110||pmg00710||pmg01120||pmg01100||pmg00010	K00150	glyceraldehyde-3-phosphate dehydrogenase (NAD(P)) [EC:1.2.1.59]	Glycolysis / Gluconeogenesis || Carbon fixation in photosynthetic organisms || Carbon metabolism || Biosynthesis of amino acids	1.2.1.59	0016620||0043891||0055114	A3PA70					P9301_00221-NC_009091	91	gap2; glyceraldehyde 3-phosphate dehydrogenase(NADP+)(phosphorylating) (EC:1.2.1.13 1.2.1.12); K00150 glyceraldehyde-3-phosphate dehydrogenase (NAD(P)) [EC:1.2.1.59]	CAM_CRCL_10527	Prochlorococcus marinus str. MIT 9301
contig_1551140_67_815_+	0.03	0.03	0.03	0.03	0.03	0.03	0.03	0.03	0.03	0.03	0.03	0.03	0.03	0.03	0.03	0.03	0.197606	0.200625	0.03	0.03	0.447696	0.000109586	0.00287724	0.0659965	0.256846	-1.96102	6.78363	2.76206	815	749	249.667	mta:Moth_0760	flagellin-like; K02406 flagellin	mta02040||mta02020	K02406	flagellin	Two-component system || Flagellar assembly || Plant-pathogen interaction || Salmonella infection || Legionellosis		0005198||0009288||0071973	Q2RKG1					ORF0060-A15O19DRAFT_NODE	32	IMG gene_oid=2236443699		alpha proteobacterium SCGC AAA015-O19
contig_1783923_875_1570_-	0.03	0.03	0.03	0.03	0.03	0.285567	0.03	0.03	0.03	0.03	0.03	0.03	0.03	0.03	0.03	0.03	0.03	0.03	0.03	0.03	0.479503	0.000112903	0.00294222	0.0635748	0.271539	-1.88077	7.54235	2.91501	1626	696	232	sch:Sphch_2487	60 kDa chaperonin; K04077 chaperonin GroEL	sch03018	K04077	chaperonin GroEL	RNA degradation || Longevity regulating pathway - worm || Type I diabetes mellitus || Legionellosis || Tuberculosis		0005524||0044267						or1962-POR4E_contig00324standard	65	thermosome subunit		Poribacteria WGA-4E
contig_1784066_8034_8888_+	0.03	0.03	0.03	0.03	0.03	0.03	0.03	0.03	0.03	0.03	0.03	0.03	0.03	0.03	0.03	0.03	0.03	0.03	0.300382	0.359752	0.761823	0.000118089	0.00305458	0.0934265	0.427625	-1.22558	8.15425	3.02755	10529	855	285														POR3G_00339-POR3G_contig_303.304	68	hypothetical protein		Poribacteria WGA-3G
contig_1417953_45_629_+	0.03	0.03	2.89644	0.03	0.03	0.03	0.03	0.03	0.03	0.03	0.03	0.03	0.03	0.03	0.03	0.03	0.03	0.03	0.03	0.270972	4.84314	0.000138445	0.00355479	0.407169	2.62516	1.3924	11.8947	3.57224	912	585	195	pmg:P9301_17111	psaL; photosystem I reaction center protein subunit XI; K02699 photosystem I subunit XI	pmg00195||pmg01100	K02699	photosystem I subunit XI	Photosynthesis		0009522||0009538||0015979	A3PF09					P9301_17111-NC_009091	98	psaL; photosystem I reaction center protein subunit XI; K02699 photosystem I subunit XI	CAM_CRCL_6724	Prochlorococcus marinus str. MIT 9301
contig_701228_1_527_-	0.03	0.03	0.03	0.03	0.03	0.367523	0.450669	0.03	0.764804	0.745857	0.759196	0.03	0.03	0.414301	0.320869	1.75346	0.03	0.03	0.03	0.832479	3.59191	0.00014092	0.00359193	0.491956	2.04193	1.02994	7.30129	2.86815	527	527	175.667										KOG1375	Beta tubulin	Cytoskeleton	CELLULAR PROCESSES AND SIGNALING	CAMPEP_0192428666-CAMNT_0036600787	61	PF00091.20: Tubulin/FtsZ family, GTPase domain PF03953.12: Tubulin C-terminal domain		Symbiodinium sp C15
contig_1957794_1_501_+	0.03	0.03	0.03	0.03	0.03	0.03	0.03	0.03	0.03	0.03	0.03	0.03	0.03	0.03	0.03	0.03	0.03	0.285086	0.03	0.311375	0.65446	0.000142064	0.00359485	0.0852819	0.369871	-1.43491	7.67407	2.93999	501	501	167								0006810||0030288						P24_07226-GCA_000299935.1_contig6	50	TRAP dicarboxylate transporter subunit DctP		Oceanibaculum indicum P24
contig_357186_205_691_+	0.03	0.03	0.03	0.03	0.03	0.03	0.03	0.03	0.825157	0.03	0.03	0.03	0.03	0.03	0.03	0.03	0.03	0.03	0.03	0.03	1.31482	0.000162966	0.00409407	0.129047	0.721935	-0.470059	10.1887	3.3489	691	487	162.333														TMO_3424-NC_017956	37	porin		Tistrella mobilis KA081020-065
contig_2045217_248_775_-	0.03	0.03	0.03	0.03	0.03	0.03	0.03	0.03	0.03	0.03	0.03	0.03	0.03	0.03	0.03	0.316699	0.26776	0.03	0.03	0.03	0.622527	0.000165007	0.00411576	0.0831898	0.352859	-1.50284	7.48321	2.90366	1304	528	176	har:HEAR2408	putative peptidoglycan-associated lipoprotein (pal); K03640 peptidoglycan-associated lipoprotein		K03640	peptidoglycan-associated lipoprotein			9279	A4G7Q2					gi149927733-NZ_ABCT01000013	98	peptidoglycan-associated lipoprotein	CAM_CRCL_425	Limnobacter MED105
contig_1202393_1_448_+	0.03	0.03	0.03	0.03	0.03	0.03	0.03	0.03	0.03	0.03	0.03	0.03	0.03	0.03	0.03	0.03	1.7113	0.03	0.546018	0.659325	2.82334	0.00021596	0.00534846	0.297618	1.56048	0.64199	9.48645	3.24587	810	448	149.333	tps:THAPSDRAFT_6139	hypothetical protein							B8C5N8					CAMPEP_0115787654-CAMNT_0003235249	93	PF00504.16: Chlorophyll A-B binding protein		Chrysochromulina polylepis, Strain UIO037
contig_1193771_2991_4686_-	0.03	0.03	0.03	0.03	0.03	0.03	0.03	0.03	0.03	0.03	0.03	0.03	0.03	0.03	0.03	0.208511	0.03	0.105353	0.03	0.196237	0.398932	0.000247167	0.0059117	0.067573	0.233253	-2.10004	5.90372	2.56163	4690	1696	565.333								0004872||0006810||0016020						JoomaDRAFT_2870-GCA_000260115.1_JH651379	66	TonB-linked outer membrane protein, SusC/RagA family		Joostella marina DSM 19592
contig_1847210_1_702_+	0.03	0.03	0.03	0.03	0.03	0.03	0.03	0.03	0.03	0.03	0.03	0.03	0.03	0.03	0.03	0.03	0.03	0.03	0.03	0.632431	0.921323	0.000246333	0.0059117	0.101131	0.511227	-0.967964	9.11018	3.18748	702	702	234	dly:Dehly_0551	ATP synthase F1 subunit beta; K02112 F-type H+-transporting ATPase subunit beta [EC:3.6.3.14]	dly00190||dly01100	K02112	F-type H+-transporting ATPase subunit beta [EC:3.6.3.14]	Oxidative phosphorylation || Photosynthesis	3.6.3.14	5524	D8JZT5					Dehly_0551-NC_014314	70	ATP synthase F1 subunit beta; K02112 F-type H+-transporting ATPase subunit beta [EC:3.6.3.14]	CAM_CRCL_22	Dehalogenimonas lykanthroporepellens BL-DC-9
contig_1886498_1_736_-	0.03	0.03	0.03	0.03	0.03	0.03	0.03	0.03	0.03	0.03	0.03	0.03	0.03	0.03	0.03	0.03	0.03	0.03	0.03	0.604601	0.880148	0.000246333	0.0059117	0.0978452	0.488997	-1.0321	8.99531	3.16917	736	736	245.333	sse:Ssed_1569	TonB-dependent receptor; K02014 iron complex outermembrane recepter protein		K02014	iron complex outermembrane recepter protein			0004872||0006810||0016020	A8FTK7					Ssed_1569-NC_009831	35	TonB-dependent receptor; K02014 iron complex outermembrane recepter protein	CAM_CRCL_23717	Shewanella sediminis HAW-EB3
contig_2059961_1_935_+	0.03	0.03	0.03	0.03	0.03	0.03	0.03	0.03	0.03	0.433483	0.03	0.03	0.03	0.03	0.03	0.191901	0.03	0.03	0.03	0.180769	0.699207	0.000245081	0.0059117	0.0959695	0.397588	-1.33065	7.28572	2.86507	935	935	311.667	hbu:Hbut_1453	ABC transporter							A2BMR6					Hbut_1453-NC_008818	27	ABC transporter	CAM_CRCL_4000580	Hyperthermus butylicus DSM 5456
contig_387485_35_478_-	0.03	0.03	0.03	0.03	0.455422	0.831238	0.03	0.03	0.03	0.03	0.03	0.03	0.03	0.03	0.375244	0.03	0.03	0.03	0.03	0.03	1.43925	0.000243182	0.0059117	0.17196	0.805607	-0.311852	8.36971	3.06518	963	444	148								9279						HIMB5_00010600-NC_018643	73	peptidoglycan-associated lipoprotein		alpha proteobacterium HIMB5
contig_1407363_1_901_-	0.03	0.03	0.03	0.03	0.03	0.03	0.03	0.03	0.03	0.03	0.03	0.03	0.03	0.03	0.200131	0.19801	0.03	0.03	0.03	0.03	0.37723	0.000254789	0.00605254	0.0626367	0.219933	-2.18486	6.02251	2.59036	901	901	300.333	olu:OSTLU_27122 || olu:OSTLU_52061	hypothetical protein || hypothetical protein							A4S6H5	KOG2404	Fumarate reductase, flavoprotein subunit	Energy production and conversion	METABOLISM	CAMPEP_0200790498-CAMNT_0046947593	86	TIGR01813: flavo_cyto_c: flavocytochrome c PF00890.19: FAD binding domain		Karlodinium micrum, Strain CCMP2283
contig_1313047_1_897_+	0.03	0.03	0.03	0.03	0.03	0.03	0.03	0.03	0.03	0.03	0.03	0.03	0.03	0.03	0.03	0.03	0.03	0.172473	0.03	0.501468	0.727557	0.000297394	0.0070169	0.0924523	0.410005	-1.28629	7.86954	2.97628	897	897	299	sat:SYN_00027	groEL; chaperonin GroEL; K04077 chaperonin GroEL	sat03018	K04077	chaperonin GroEL	RNA degradation || Longevity regulating pathway - worm || Type I diabetes mellitus || Legionellosis || Tuberculosis		0005524||0044267	Q2LPJ8					Sthe_0845-NC_013524	63	chaperonin GroEL	CAM_CRCL_36	Sphaerobacter thermophilus DSM 20745
contig_1200860_991_1374_-	0.03	0.03	0.03	0.03	0.03	0.03	0.03	0.03	0.03	0.03	0.03	0.03	0.03	0.03	0.03	0.424211	0.35692	0.362807	0.03	0.03	0.844725	0.000364557	0.00846957	0.118984	0.481854	-1.05333	7.09949	2.82771	2322	384	128														gi126662605-NZ_AAXX01000001	72	outer membrane protein OmpA family P60	CAM_CRCL_26150	Flavobacteria bacterium BAL38
contig_1321339_1_778_-	0.03	0.03	0.03	0.03	0.03	0.03	0.03	0.03	0.03	0.03	0.03	0.03	0.03	0.03	0.03	0.03	0.03	0.03	0.327142	0.03	0.432126	0.000385642	0.00846957	0.0632985	0.247712	-2.01326	6.82681	2.77121	1110	778	259.333	abo:ABO_2685	pstS; phosphate ABC transporter periplasmic binding protein; K02040 phosphate transport system substrate-binding protein	abo02010||abo02020	K02040	phosphate transport system substrate-binding protein	ABC transporters || Two-component system || Tuberculosis			Q0VL15					ABO_2685-NC_008260	66	pstS; phosphate ABC transporter periplasmic binding protein; K02040 phosphate transport system substrate-binding protein	CAM_CRCL_4741	Alcanivorax borkumensis SK2
contig_1412409_1_887_-	0.03	0.03	0.03	0.03	0.03	0.03	0.03	0.03	0.03	0.03	0.03	0.03	0.03	0.03	0.03	0.03	0.03	0.03	0.290627	0.03	0.382711	0.000385642	0.00846957	0.0592066	0.220959	-2.17815	6.46399	2.69243	887	887	295.667	ppu:PP_2282	minor capsid protein 10							Q88KK8					gi61806429-NC_006882	76	10 T7-like capsid protein	CAM_CRCL_32949694	Prochlorococcus phage P-SSP7
contig_1617341_277_1044_+	0.03	0.03	0.03	0.03	0.03	0.03	0.03	0.03	0.03	0.03	0.03	0.03	0.03	0.03	0.03	0.03	0.03	0.03	0.331011	0.03	0.437362	0.000385642	0.00846957	0.0637321	0.250547	-1.99685	6.86252	2.77874	4027	768	256	pmt:PMT1782	tuf; elongation factor Tu (EC:3.6.5.3); K02358 elongation factor Tu		K02358	elongation factor Tu			0003924||0005525	Q7V500					PMT1782-NC_005071	94	tuf; elongation factor Tu (EC:3.6.5.3); K02358 elongation factor Tu	CAM_CRCL_14704263	Prochlorococcus marinus str. MIT 9313
contig_1638976_1_304_-	0.03	0.03	0.03	0.79007	0.03	0.03	0.03	0.03	0.03	0.03	0.03	0.03	0.03	0.03	0.03	0.03	0.03	0.03	0.03	0.03	1.05913	0.000384649	0.00846957	0.1152	0.587163	-0.768167	9.19382	3.20066	304	304	101.333								0016616||0055114						amad1_17410-NC_019393	100	malate dehydrogenase		Alteromonas macleodii AltDE1
contig_2025113_557_958_-	0.03	0.03	0.03	0.03	0.03	0.03	0.03	0.03	0.03	0.03	0.03	0.03	0.03	0.03	0.03	0.03	0.03	0.03	0.605065	0.03	0.808245	0.000385642	0.00846957	0.0944433	0.451344	-1.1477	8.55799	3.09727	1307	402	134								0015986||0045261||0046933||0046961						HIMB59_00001970-NC_018644	86	ATP synthase F1 subunit gamma		alpha proteobacterium HIMB59
contig_2047930_1108_1623_+	0.03	0.03	0.03	0.03	0.03	0.03	0.03	0.03	0.03	0.03	0.03	0.03	0.03	0.03	0.03	0.03	0.03	0.03	0.478016	0.03	0.636307	0.000385642	0.00846957	0.0802059	0.358256	-1.48094	7.93342	2.98794	1624	516	172	sit:TM1040_3357	TRAP dicarboxylate transporter-DctP subunit						0006810||0030288	Q1GLY7					TM1040_3357-NC_008043	85	TRAP dicarboxylate transporter-DctP subunit	CAM_CRCL_34013991	Ruegeria TM1040
contig_2056872_244_996_-	0.03	0.03	0.03	0.03	0.03	0.03	0.03	0.03	0.03	0.03	0.03	0.03	0.03	0.03	0.03	0.03	0.03	0.03	0.337007	0.03	0.445477	0.000385642	0.00846957	0.064404	0.254941	-1.97177	6.91692	2.79013	2350	753	251	tps:THAPSDRAFT_270092	hypothetical protein							B8CFP9					CAMPEP_0181192402-CAMNT_0023281797	65	PF00504.16: Chlorophyll A-B binding protein		Haptolina ericina
contig_360308_1_433_+	0.03	0.03	0.03	0.03	0.03	0.03	0.03	0.03	0.03	0.03	0.03	0.03	0.03	0.03	0.03	0.03	0.03	0.03	0.563894	0.03	0.752527	0.000385642	0.00846957	0.0898296	0.421179	-1.2475	8.37728	3.06648	433	433	144.333	rpf:Rpic12D_2863	porin							C6BF91					Rpic12D_2863-NC_012856	62	porin	CAM_CRCL_24285	Ralstonia pickettii 12D
contig_647142_98_292_-	0.03	0.03	0.03	0.03	0.03	0.03	0.03	0.03	0.03	0.03	0.03	0.03	0.03	0.03	0.03	0.03	0.03	0.03	1.21552	0.03	1.63438	0.000385642	0.00846957	0.162852	0.898617	-0.154222	10.036	3.32711	333	195	65	pmn:PMN2A_0091 || pme:NATL1_07161	hypothetical protein || hypothetical protein							A2C1B4					NATL1_07161-NC_008819	100	hypothetical protein	CAM_CRCL_4838042	Prochlorococcus marinus str. NATL1A
contig_684343_992_2730_-	0.03	0.03	0.03	0.03	0.03	0.03	0.03	0.03	0.03	0.03	0.03	0.03	0.03	0.03	0.03	0.03	0.03	0.03	0.162936	0.03	0.209905	0.000385642	0.00846957	0.0448972	0.127401	-2.97255	4.67523	2.22504	2732	1739	579.667														NKOR_08410-NC_018655	29	hypothetical protein		Nitrosopumilus koreensis AR1
contig_2125792_1_1022_+	0.03	0.03	0.03	0.03	0.214821	0.03	0.03	0.03	0.03	0.03	0.03	0.03	0.03	0.03	0.03	0.03	0.03	0.03	0.03	0.167934	0.33612	0.000405361	0.00884701	0.0599464	0.198033	-2.33619	5.607	2.48723	1127	1022	340.667	pde:Pden_3460	ABC polyamine/opine transporter, periplasmic substrate-binding protein; K02055 putative spermidine/putrescine transport system substrate-binding protein		K02055	putative spermidine/putrescine transport system substrate-binding protein				A1B7N7					gi89069209-NZ_AAOT01000014	46	hypothetical protein	CAM_CRCL_33245214	Oceanicola granulosus HTCC2516
contig_1315062_47_451_-	0.03	0.03	0.03	0.03	0.03	0.03	0.03	0.03	0.03	0.03	0.03	0.03	0.03	0.03	0.03	0.03	0.03	0.03	1.17161	1.42228	2.34744	0.000477217	0.0103506	0.261016	1.30423	0.383196	8.99347	3.16888	1008	405	135	pme:NATL1_18501	atpH; F0F1 ATP synthase subunit delta (EC:3.6.3.14); K02113 F-type H+-transporting ATPase subunit delta [EC:3.6.3.14]	pme01100||pme00190||pme00195	K02113	F-type H+-transporting ATPase subunit delta	Oxidative phosphorylation || Photosynthesis	3.6.3.14	0000275||0015986||0045261||0045262||0046933	A2C4J6					NATL1_18501-NC_008819	99	atpH; F0F1 ATP synthase subunit delta (EC:3.6.3.14); K02113 F-type H+-transporting ATPase subunit delta [EC:3.6.3.14]	CAM_CRCL_4000252	Prochlorococcus marinus str. NATL1A
contig_1565258_116_976_-	0.03	0.03	0.03	0.03	0.03	0.03	0.03	0.03	0.03	0.03	0.03	0.03	0.313094	0.03	0.03	0.03	0.03	0.03	0.03	0.03	0.393362	0.000509507	0.0109827	0.0607836	0.227073	-2.13877	6.47151	2.6941	1345	861	287	apb:SAR116_1458	Leu/Ile/Val-binding protein (EC:3.4.22.34); K01999 branched-chain amino acid transport system substrate-binding protein	apb02010	K01999	branched-chain amino acid transport system substrate-binding protein	ABC transporters			D5BTV4					gi159181050-ABHC01000004	66	Leu/Ile/Val-binding protein	CAM_CRCL_5179	alpha proteobacterium BAL199
contig_1631375_175_855_+	0.03	0.03	0.03	0.03	0.03	0.03	0.03	0.03	0.03	0.03	0.03	0.03	0.03	0.03	0.255093	0.252287	0.03	0.217662	1.0484	0.237003	1.40821	0.000523571	0.0112166	0.184222	0.796217	-0.328766	7.64412	2.93435	855	681	227	mno:Mnod_1123	malate dehydrogenase, NAD-dependent; K00024 malate dehydrogenase [EC:1.1.1.37]	mno00710||mno01120||mno01100||mno00680||mno00630||mno01110||mno00620||mno00020	K00024	malate dehydrogenase [EC:1.1.1.37]	Citrate cycle (TCA cycle) || Cysteine and methionine metabolism || Pyruvate metabolism || Glyoxylate and dicarboxylate metabolism || Methane metabolism || Carbon fixation in photosynthetic organisms || Carbon fixation pathways in prokaryotes || Carbon metabolism	1.1.1.37	0016491||0016616||0030060||0055114	B8IJB4					TH2_07126-GCA_000300275.1_contig3	98	malate dehydrogenase		Thalassospira profundimaris WP0211
contig_1256165_1_556_-	0.03	0.03	0.03	0.03	0.03	0.03	0.03	0.03	0.03	0.03	0.03	0.03	0.03	0.03	0.03	0.03	0.03	0.489705	0.03	1.29771	1.71806	0.000566729	0.0120672	0.192642	0.955352	-0.065895	8.91844	3.15679	1099	556	185.333	oca:OCAR_7523	extracellular solute-binding protein, family 5; K02035 peptide/nickel transport system substrate-binding protein	oca02010	K02035	peptide/nickel transport system substrate-binding protein				B6JJN2					gi159176869-ABHC01000033	67	ABC transporter, substrate-binding protein, family 5	CAM_CRCL_28084	alpha proteobacterium BAL199
contig_1266878_1_905_-	0.03	0.03	0.03	0.03	0.03	0.03	0.03	0.03	0.03	0.03	0.03	0.03	0.03	0.03	0.03	0.03	0.30743	0.03	0.03	0.03	0.375695	0.000597553	0.0126464	0.0596727	0.217684	-2.19969	6.29594	2.65442	1203	905	301.667	vcn:VOLCADRAFT_81546	pgk1; phosphoglycerate kinase; K00927 phosphoglycerate kinase [EC:2.7.2.3]						0004618||0006096						CAMPEP_0187575324-CAMNT_0030668755	87	PF00162.14: Phosphoglycerate kinase		Emiliania huxleyi 374
contig_314582_1_1064_+	0.03	0.03	0.03	0.03	0.03	0.03	0.03	0.03	0.03	0.03	0.03	0.03	0.03	0.220345	0.174068	0.03	0.03	0.03	0.03	0.03	0.324036	0.000607509	0.0127797	0.0599261	0.191981	-2.38096	5.40726	2.4349	2006	1064	354.667	abi:Aboo_1255	extracellular solute-binding protein family 5; K02035 peptide/nickel transport system substrate-binding protein	abi02010	K02035	peptide/nickel transport system substrate-binding protein				B5ICI6					Aboo_1255-NC_013926	33	extracellular solute-binding protein family 5; K02035 peptide/nickel transport system substrate-binding protein	CAM_CRCL_19011	Aciduliprofundum boonei T469
contig_380632_1_603_+	0.03	0.03	0.03	0.03	0.03	0.03	0.03	0.03	0.03	1.28127	0.03	0.03	0.03	0.03	0.03	0.03	0.238188	0.241937	0.03	0.03	1.58649	0.000680586	0.0142312	0.183709	0.885099	-0.176089	8.6359	3.11035	603	603	201										KOG0676	Actin and related proteins	Cytoskeleton	CELLULAR PROCESSES AND SIGNALING	CAMPEP_0186742784-CAMNT_0029618829	99	PF00022.14: Actin		Azadinium spinosum 3D9
contig_856635_1_980_+	0.03	0.03	0.03	0.03	0.03	0.39301	0.03	0.03	0.425144	0.799912	0.03	0.03	0.03	0.03	0.03	0.338933	0.03	0.03	14.1837	2.47538	16.9497	0.000804144	0.0167147	1.7136	9.33164	3.22213	9.89124	3.30615	1535	980	326.667	bbt:BBta_7783	putative osmotically-inducible protein Y						5515	A5ETW9					BBta_7783-NC_009485	81	putative osmotically-inducible protein Y	CAM_CRCL_4005939	Bradyrhizobium BTAi1
contig_1500567_1169_1807_-	0.03	0.03	0.03	0.03	0.325598	0.03	0.03	0.03	0.03	0.03	0.03	0.03	0.03	0.03	0.269888	0.03	0.226459	0.03	0.03	0.03	0.5196	0.000863711	0.0178466	0.0881688	0.303884	-1.71841	5.89324	2.55906	2144	639	213	din:Selin_2168	phosphonate ABC transporter periplasmic phosphonate-binding protein; K02044 phosphonate transport system substrate-binding protein	din02010	K02044	phosphonate transport system substrate-binding protein	ABC transporters		0030288||0031362||0043168||0043225||0055052	E6W3D4					GCAORF0671-TG_gca_382	65	phosphate/phosphite/phosphonate ABC transporters, periplasmic binding protein	CAM_CRCL_4002378	Chrysiogenes arsenatis DSM 11915
contig_465750_1_863_-	0.03	0.03	0.03	0.03	0.03	0.03	0.03	0.03	0.03	0.03	0.03	0.03	0.03	0.03	0.03	0.03	0.03	0.03	0.297875	0.193347	0.39252	0.000872868	0.0179297	0.0677972	0.230158	-2.1193	5.78961	2.53347	937	863	287.667	pmb:A9601_08311	glgC; glucose-1-phosphate adenylyltransferase (EC:2.7.7.27); K00975 glucose-1-phosphate adenylyltransferase [EC:2.7.7.27]	pmb00520||pmb00500||pmb01100	K00975	glucose-1-phosphate adenylyltransferase [EC:2.7.7.27]	Starch and sucrose metabolism || Amino sugar and nucleotide sugar metabolism	2.7.7.27	0008878||0009058||0016779	A2BQQ4					A9601_08311-NC_008816	98	glgC; glucose-1-phosphate adenylyltransferase (EC:2.7.7.27); K00975 glucose-1-phosphate adenylyltransferase [EC:2.7.7.27]	CAM_CRCL_4989	Prochlorococcus marinus str. AS9601
contig_2038808_1962_2360_-	0.03	0.03	0.03	0.609101	0.03	0.03	0.03	0.03	0.03	0.03	0.03	0.03	0.03	0.03	0.03	0.409391	0.03	0.03	0.03	0.03	0.814096	0.000976375	0.0199386	0.11298	0.463538	-1.10924	7.20564	2.84913	3263	399	133	lan:Lacal_0708	MotA/TolQ/ExbB proton channel; K03561 biopolymer transport protein ExbB		K03561	biopolymer transport protein ExbB									Lacal_0708-NC_015638	50	MotA/TolQ/ExbB proton channel; K03561 biopolymer transport protein ExbB	CAM_CRCL_3315	Lacinutrix 5H-3-7-4
contig_717152_154_837_+	0.03	0.03	0.03	0.03	0.03	0.03	0.03	0.03	0.03	0.03	0.03	0.03	0.03	0.03	0.254106	0.03	0.03	0.03	0.367977	0.03	0.487389	0.000999523	0.0202926	0.0785463	0.282968	-1.82129	6.20512	2.63346	884	684	228	dal:Dalk_3192	short-chain dehydrogenase/reductase SDR						0008152||0016491	B8FGH3					Dalk_3192-NC_011768	58	short-chain dehydrogenase/reductase SDR	CAM_CRCL_33233377	Desulfatibacillum alkenivorans AK-01
contig_1904582_38_360_-	0.03	0.03	0.03	0.03	0.03	0.03	0.03	0.03	0.03	0.03	0.03	0.03	0.03	0.03	0.03	0.03	0.80732	0.425659	0.03	0.03	0.998589	0.0010993	0.0221894	0.131979	0.565284	-0.822951	7.56625	2.91958	360	323	107.667														PB7211_298-NZ_DS995298	93	trap dicarboxylate transporter - dctp subunit	CAM_CRCL_32971168	Pelagibacter HTCC7211
contig_1216319_1_1729_+	0.03	0.03	0.03	0.03	0.03	0.03	0.03	0.03	0.03	0.03	0.03	0.03	0.03	0.03	0.03	0.03	0.03	0.03	0.03	0.193064	0.210945	0.00113622	0.0226724	0.0463814	0.128663	-2.95833	4.54806	2.18525	1866	1729	576.333	cyu:UCYN_02400	putative S-layer protein						0005215||0006810||0016021	D3END7					gi67922310-NZ_AADV02000008	95	S-layer homology region	CAM_CRCL_4000813	Crocosphaera watsonii WH 8501
contig_290296_1107_2051_+	0.03	0.03	0.03	0.03	0.03	0.03	0.03	0.03	0.03	0.03	0.03	0.03	0.03	0.03	0.03	0.03	0.03	0.03	0.03	0.328347	0.361063	0.00113622	0.0226724	0.0599719	0.210517	-2.24799	6.02054	2.58989	2376	945	315	aci:ACIAD1765	branched-chain amino acid ABC transporter periplasmic substrate-binding protein; K01999 branched-chain amino acid transport system substrate-binding protein	aci02010	K01999	branched-chain amino acid transport system substrate-binding protein	ABC transporters			Q6FBF8					gi491016406-NZ_BAEB01000022	100	branched-chain amino acid ABC transporter substrate-binding protein		Acinetobacter NBRC 100985
contig_14818_1_542_+	0.03	0.03	0.03	0.03	0.03	0.03	0.03	0.03	0.03	0.03	0.03	0.03	0.03	0.03	0.03	0.03	0.261618	0.737369	0.03	0.81027	1.18444	0.00129923	0.0257779	0.166843	0.675644	-0.565666	7.09916	2.82765	542	542	180.667	dhd:Dhaf_0689	reductive dehalogenase							B8FVW7					Cyagr_2355-Cyagr_Contig81	40	hypothetical protein		Cyanobium gracile PCC 6307
contig_1414761_87_822_+	0.03	0.03	0.03	0.03	0.03	0.03	0.03	0.03	0.03	0.03	0.03	0.03	0.03	0.03	0.03	0.03	0.200567	0.03	1.60049	0.03	1.7303	0.00134538	0.0265427	0.193874	0.962085	-0.055764	8.92485	3.15783	822	736	245.333	pmn:PMN2A_1597 || pme:NATL1_03081	photosystem II manganese-stabilizing protein; K02716 photosystem II oxygen-evolving enhancer protein 1 || psbO; photosystem II manganese-stabilizing protein; K02716 photosystem II oxygen-evolving enhancer protein 1	pme01100||pme00195	K02716	photosystem II oxygen-evolving enhancer protein 1	Photosynthesis		0005509||0009523||0009654||0015979||0019898||0042549	A2C062					NATL1_03081-NC_008819	96	psbO; photosystem II manganese-stabilizing protein; K02716 photosystem II oxygen-evolving enhancer protein 1	CAM_CRCL_33488186	Prochlorococcus marinus str. NATL1A
contig_399475_130_1032_+	0.03	0.03	0.03	0.03	0.03	0.03	0.03	0.03	0.03	0.03	0.03	0.03	0.03	0.03	0.03	0.03	0.169022	0.03	0.286009	0.186112	0.376461	0.00144537	0.0283553	0.0727431	0.224602	-2.15456	5.17522	2.37162	1202	903	301	pmb:A9601_02491	psbO; photosystem II manganese-stabilizing protein; K02716 photosystem II oxygen-evolving enhancer protein 1	pmb00195||pmb01100	K02716	photosystem II oxygen-evolving enhancer protein 1	Photosynthesis		0005509||0009523||0009654||0015979||0019898||0042549	A2BP26					A9601_02491-NC_008816	98	psbO; photosystem II manganese-stabilizing protein; K02716 photosystem II oxygen-evolving enhancer protein 1	CAM_CRCL_4126	Prochlorococcus marinus str. AS9601
contig_1702243_1_418_+	0.03	0.03	0.03	0.03	0.03	0.03	0.03	0.03	0.956415	0.03	0.03	0.03	0.03	0.514514	0.763436	0.754293	0.03	0.03	0.03	0.03	1.52691	0.00156394	0.0305099	0.237884	0.882398	-0.180499	6.41871	2.68228	418	418	139.333	pub:SAR11_0953	yhdW; ABC transporter; K09969 general L-amino acid transport system substrate-binding protein	pub02010	K09969	general L-amino acid transport system substrate-binding protein	ABC transporters			Q4FM26					gi91763314-NZ_AAPV01000002	91	ABC transporter	CAM_CRCL_31617888	Pelagibacter ubique HTCC1002
contig_1438020_851_1435_-	0.03	0.03	0.03	5.16469	0.675769	0.942178	0.408962	0.03	0.03	3.25442	2.6576	0.413886	0.863313	0.3762	0.554062	3.91147	0.244593	0.466916	1.21552	0.270972	7.51711	0.00174286	0.033757	1.38513	4.45112	2.15417	5.42702	2.44016	4126	585	195														CAMPEP_0118673776-CAMNT_0006568893	39			Striatella unipunctata
contig_2055300_1_382_+	0.03	0.03	0.03	6.68359	6.4581	3.75513	4.67278	2.34852	7.12605	4.96792	7.07189	4.14522	1.30615	4.2714	2.43767	2.80393	2.65905	5.04824	3.05587	6.30348	13.9528	0.00174972	0.033757	4.24561	9.09923	3.18574	3.28641	1.71651	1777	382	127.333	dsh:Dshi_1971	putative TRAP-transporter extracellular solute-binding protein						0006810||0030288	A8LP28					gi159179956-ABHC01000008	75	trap dicarboxylate transporter- dctp subunit	CAM_CRCL_4006732	alpha proteobacterium BAL199
contig_1805989_1_1063_+	0.03	0.03	0.03	0.03	0.03	0.197333	0.03	0.03	0.394291	0.03	0.03	0.03	0.03	0.03	0.03	0.03	0.03	0.751343	0.247475	1.62137	1.79588	0.00216691	0.0415762	0.25989	1.02788	0.0396761	6.91014	2.78872	1214	1063	354.333	cag:Cagg_0488	chaperonin GroEL; K04077 chaperonin GroEL	cag03018	K04077	chaperonin GroEL	RNA degradation || Longevity regulating pathway - worm || Type I diabetes mellitus || Legionellosis || Tuberculosis		0005524||0044267	B8G3P6					OSCT_1265-NZ_ADVR01000037	68	chaperonin GroEL	CAM_CRCL_36	Oscillochloris trichoides DG-6
contig_660084_1_296_-	0.03	0.03	0.03	0.03	0.03	0.03	0.03	0.03	0.03	0.03	0.03	0.03	0.03	0.03	0.03	0.03	0.454112	0.46175	0.811001	0.506246	1.08694	0.00221821	0.0423278	0.180955	0.633948	-0.657564	6.0067	2.58657	333	296	98.6667	pub:SAR11_1302	opuAC; substrate-binding region of ABC-type glycine betaine transport system; K02002 glycine betaine/proline transport system substrate-binding protein	pub02010	K02002	glycine betaine/proline transport system substrate-binding protein	ABC transporters		0005215||0006810	Q4FL33					PB7211_687-NZ_DS995298	97	substrate-binding region of ABC-type glycine betaine transport system	CAM_CRCL_34122627	Pelagibacter HTCC7211
contig_1764106_1_499_+	0.03	0.03	0.03	0.956097	1.1656	1.45585	1.36282	3.5798	1.58207	0.786026	3.11045	1.38014	1.00693	4.90039	4.63786	2.45689	2.54578	2.33497	0.956558	1.72502	7.55355	0.00246603	0.0468009	2.07556	4.81456	2.2674	3.63928	1.86365	682	499	166.333	vcn:VOLCADRAFT_75910 || vcn:VOLCADRAFT_77081	tubB1; beta tubulin; K07375 tubulin beta || tubB2; beta tubulin								KOG1375	Beta tubulin	Cytoskeleton	CELLULAR PROCESSES AND SIGNALING	CAMPEP_0202725916-CAMNT_0049392121	67	PF00091.20: Tubulin/FtsZ family, GTPase domain PF03953.12: Tubulin C-terminal domain		Elphidium margaritaceum
contig_1199133_1_965_+	0.03	0.03	0.03	0.508883	0.03	0.03	0.03	0.03	0.03	0.03	0.03	0.03	0.03	0.03	0.188848	0.343735	0.16009	0.294866	0.269561	0.176082	0.678403	0.00272793	0.0514915	0.143356	0.410879	-1.28321	4.73231	2.24254	3080	965	321.667	lan:Lacal_0945	OmpA/MotB domain-containing protein						0005509||0007155						FBALC1_16542-NZ_ABHI01000001	62	OmpA domain protein	CAM_CRCL_26150	Flavobacteriales bacterium ALC-1
contig_315734_1_1665_+	0.03	0.03	0.03	0.03	0.03	0.03	0.03	0.03	0.03	0.03	0.03	0.03	0.03	0.03	0.21413	0.03	0.03	0.03	0.03	0.114666	0.217901	0.00313888	0.0589299	0.0517475	0.134824	-2.89085	4.21085	2.07411	1666	1665	555														POR3G_03208-POR3G_contig_303.304	37	Periplasmic protein TonB, links inner and outer membranes		Poribacteria WGA-3G
contig_353184_201_316_-	0.03	0.03	0.03	0.03	0.03	0.03	0.03	0.03	0.03	3.28221	3.34281	0.03	0.03	0.03	0.03	0.03	0.03	0.03	0.03	3.67575	5.42404	0.00321986	0.060127	0.773086	3.09856	1.6316	7.01609	2.81067	316	116	38.6667	pmg:P9301_02861	amtB; ammonium transporter							A3PAY4					P9301_02861-NC_009091	100	amtB; ammonium transporter	CAM_CRCL_16663	Prochlorococcus marinus str. MIT 9301
contig_1299941_32_949_-	0.03	0.03	0.03	0.03	0.03	0.03	0.03	0.03	0.03	0.03	0.03	0.274634	0.561033	0.03	0.196981	1.34919	1.39751	1.97899	1.28913	0.644243	2.7564	0.0033234	0.0614751	0.514672	1.63554	0.709763	5.35565	2.42106	2367	918	306														gi149926723-NZ_ABCT01000005	54	Gram-negative porin	CAM_CRCL_24285	Limnobacter MED105
contig_1625839_1_395_+	0.03	0.03	0.03	0.03	0.03	0.03	0.03	0.03	0.03	0.03	0.03	0.03	0.03	0.03	0.03	0.03	1.30126	0.03	1.20051	0.03	1.61407	0.00332726	0.0614751	0.221707	0.91789	-0.123607	7.28021	2.86398	508	395	131.667	tps:THAPSDRAFT_270092	hypothetical protein							B8CFP9					CAMPEP_0199689156-CAMNT_0045554649	99	PF00504.16: Chlorophyll A-B binding protein		Pelagomonas calceolata , Strain CCMP1756
contig_1571577_1057_1938_+	0.03	0.03	0.03	0.03	0.03	0.03	0.03	0.03	0.03	0.03	0.03	0.03	0.03	0.03	0.03	0.201629	0.03	0.174896	0.03	0.349657	0.38471	0.00341449	0.0627547	0.0771854	0.230948	-2.11436	4.98424	2.31737	1939	882	294	rde:RD1_3516	groEL; chaperonin GroEL; K04077 chaperonin GroEL	rde03018	K04077	chaperonin GroEL	RNA degradation || Longevity regulating pathway - worm || Type I diabetes mellitus || Legionellosis || Tuberculosis		0005524||0044267	Q162U5					RD1_3516-NC_008209	96	groEL; chaperonin GroEL; K04077 chaperonin GroEL	CAM_CRCL_36	Roseobacter denitrificans OCh 114
contig_1530385_170_458_+	0.03	0.03	0.03	0.03	0.03	0.645484	0.797103	0.03	0.03	0.03	0.03	0.03	0.03	0.03	0.560409	0.03	0.03	0.03	0.03	0.517781	1.11254	0.00358874	0.0652702	0.195872	0.654207	-0.612182	5.67993	2.50587	458	289	96.3333														AAA07O23_00447-AAA07O23_contig_66_0.32	81	ammonia monooxygenase subunit B (EC 1.13.12.-)		Thaumarchaeota archaeon SCGC AAA007-O23
contig_1808621_242_645_-	0.03	0.03	0.03	0.03	0.497543	0.03	0.03	0.03	0.03	0.963804	0.981203	0.03	0.03	0.531304	0.03	0.779392	0.03	0.662663	0.03	0.03	1.57878	0.00358516	0.0652702	0.305462	0.942123	-0.0860129	5.16852	2.36975	645	404	134.667														Mesau_02090-NC_019973	69	putative ABC-type transport system, periplasmic component/surface lipoprotein		Mesorhizobium australicum WSM2073
contig_1202537_5014_5838_+	0.03	0.03	0.03	0.03	0.03	0.03	0.03	0.03	0.03	0.03	0.03	0.03	0.03	0.03	0.03	0.213487	0.182166	0.184907	0.310214	0.200871	0.409217	0.00369125	0.0667868	0.0928982	0.251058	-1.99391	4.40501	2.13914	6031	825	275	lan:Lacal_0423	hypothetical protein												gi161326661-ABIB01000001	36	secreted protein	CAM_CRCL_4526017	Kordia algicida OT-1
contig_1835741_1_607_-	0.03	0.03	0.03	0.03	0.03	0.03	0.03	0.03	0.66796	0.65151	0.03	0.03	0.03	0.03	0.03	0.279386	0.650447	0.24054	0.410851	0.03	1.06082	0.00381633	0.0686939	0.208644	0.634733	-0.655779	5.08437	2.34607	607	607	202.333	pmb:A9601_17431	rpoA; DNA-directed RNA polymerase subunit alpha (EC:2.7.7.6); K03040 DNA-directed RNA polymerase subunit alpha [EC:2.7.7.6]	pmb03020||pmb00230||pmb00240||pmb01100	K03040	DNA-directed RNA polymerase subunit alpha [EC:2.7.7.6]	Purine metabolism || Pyrimidine metabolism || RNA polymerase	2.7.7.6	0003899||0006351||0046983	A2BTB5					A9601_17431-NC_008816	94	rpoA; DNA-directed RNA polymerase subunit alpha (EC:2.7.7.6); K03040 DNA-directed RNA polymerase subunit alpha [EC:2.7.7.6]	CAM_CRCL_1415	Prochlorococcus marinus str. AS9601
contig_1643840_100_963_-	0.03	0.03	0.03	0.03	0.03	0.03	0.03	0.03	0.03	0.03	0.03	0.03	0.03	0.03	0.03	0.03	0.611191	0.03	1.10026	0.03	1.1163	0.00392026	0.0702029	0.160369	0.638335	-0.647615	6.96082	2.79926	1493	864	288	pmn:PMN2A_1350	glyceraldehyde 3-phosphate dehydrogenase(NADP+)(phosphorylating) (EC:1.2.1.13); K00150 glyceraldehyde-3-phosphate dehydrogenase (NAD(P)) [EC:1.2.1.59]	pmn00010||pmn00710||pmn01120||pmn01110||pmn01100	K00150	glyceraldehyde-3-phosphate dehydrogenase (NAD(P)) [EC:1.2.1.59]	Glycolysis / Gluconeogenesis || Carbon fixation in photosynthetic organisms || Carbon metabolism || Biosynthesis of amino acids	1.2.1.59	0016620||0043891||0055114	Q46I39					PMN2A_1350-NC_007335	94	glyceraldehyde 3-phosphate dehydrogenase(NADP+)(phosphorylating) (EC:1.2.1.13); K00150 glyceraldehyde-3-phosphate dehydrogenase (NAD(P)) [EC:1.2.1.59]	CAM_CRCL_14044390	Prochlorococcus marinus str. NATL2A
contig_336979_1_207_-	0.03	0.03	0.03	0.03	0.942499	0.03	0.03	0.03	0.03	0.03	0.03	0.03	1.20751	0.03	0.03	0.03	0.63646	0.03	0.03	0.711009	1.54137	0.00423585	0.0754673	0.262802	0.902088	-0.14866	5.86515	2.55217	207	207	69														HIMB5_00009750-NC_018643	79	spermidine/putrescine ABC transporter substrate-binding protein		alpha proteobacterium HIMB5
contig_663997_1_574_+	0.03	0.03	0.03	0.03	0.03	0.649773	0.03	0.03	0.03	0.03	0.03	0.03	0.03	0.03	0.03	0.03	0.03	0.03	0.03	0.03	0.575043	0.00427454	0.0757701	0.0854674	0.330255	-1.59835	6.72821	2.75022	703	574	191.333	pub:SAR11_0982	hypothetical protein							Q4FLZ8					ORF0203-A536G10DRAFT_NOD	74	IMG gene_oid=2236275253		alpha proteobacterium SCGC AAA536-G10
contig_1286759_660_1812_+	0.03	0.03	0.03	0.03	0.03	0.03	0.03	0.03	0.03	0.03	0.03	0.03	0.03	0.03	0.03	0.03	0.247757	0.14084	0.2305	0.03	0.301339	0.00471218	0.0831057	0.068116	0.184728	-2.43653	4.42392	2.14532	1813	1153	384.333	pmm:PMM0311	metK; S-adenosylmethionine synthetase (EC:2.5.1.6); K00789 S-adenosylmethionine synthetase [EC:2.5.1.6]	pmm01100||pmm00270||pmm01110	K00789	S-adenosylmethionine synthetase [EC:2.5.1.6]	Cysteine and methionine metabolism || Biosynthesis of amino acids	2.5.1.6	0004478||0006556	Q7V2Y8					PMM0311-NC_005072	76	metK; S-adenosylmethionine synthetase (EC:2.5.1.6); K00789 S-adenosylmethionine synthetase [EC:2.5.1.6]	CAM_CRCL_32726852	Prochlorococcus marinus subsp. pastoris str. CCMP1986
contig_685121_1_411_+	0.03	0.03	0.03	0.03	0.03	0.03	0.03	0.03	0.03	0.03	0.03	0.03	0.03	0.03	0.03	0.03	0.03	0.03	0.592473	0.71598	0.791203	0.00488377	0.0856991	0.125698	0.45845	-1.12516	6.29448	2.65409	411	411	137								0005215||0006810						HIMB114_1100-NZ_GG704932	92	immunogenic protein	CAM_CRCL_2548	alpha proteobacterium HIMB114
contig_1977779_1211_1847_+	0.03	0.03	0.03	0.03	0.03	0.03	0.378026	0.03	0.03	0.03	0.03	0.03	0.03	0.03	0.03	0.03	0.03	0.230625	0.392914	0.251301	0.521137	0.00506293	0.0883988	0.107333	0.314235	-1.67008	4.85531	2.27956	1848	637	212.333	sil:SPO0519	glutamate/glutamine/aspartate/asparagine ABC transporter, periplasmic substrate-binding protein; K09969 general L-amino acid transport system substrate-binding protein	sil02010	K09969	general L-amino acid transport system substrate-binding protein	ABC transporters			Q5LW24					SPO0519-NC_003911	72	glutamate/glutamine/aspartate/asparagine ABC transporter, periplasmic substrate-binding protein; K09969 general L-amino acid transport system substrate-binding protein	CAM_CRCL_31617888	Ruegeria pomeroyi DSS-3
contig_378732_1_839_+	0.03	0.03	0.03	0.305401	0.03	0.03	0.03	0.03	0.03	0.03	0.03	0.03	0.03	0.03	0.212703	0.210426	0.179627	0.182322	0.03	0.19802	0.40289	0.00560138	0.0973136	0.100542	0.251716	-1.99013	4.00717	2.00258	839	839	279.667	fbc:FB2170_06520	thrombospondin type 3 repeat:OmpA/MotB						0005509||0007155	A4APJ9					FB2170_06520-NC_014472	57	thrombospondin type 3 repeat:OmpA/MotB	CAM_CRCL_32523317	Maribacter HTCC2170
contig_1253425_1017_1702_+	0.03	0.03	0.03	0.03	0.03	0.03	0.03	0.03	0.03	0.03	0.03	0.03	0.03	0.03	0.03	0.03	0.03	0.216294	0.366992	1.05747	0.942112	0.00585684	0.101248	0.147279	0.544696	-0.876478	6.39677	2.67734	1703	686	228.667	tro:trd_1300	groL; chaperonin GroEL; K04077 chaperonin GroEL	tro03018	K04077	chaperonin GroEL	RNA degradation || Longevity regulating pathway - worm || Type I diabetes mellitus || Legionellosis || Tuberculosis		0005524||0044267	B9L1N8					trd_1300-NC_011959	78	groL; chaperonin GroEL; K04077 chaperonin GroEL	CAM_CRCL_36	Thermomicrobium roseum DSM 5159
contig_1536530_1_666_+	1.36128	0.03	2.54782	0.03	0.03	0.03	0.03	0.03	0.03	0.03	0.03	0.03	0.03	0.03	0.03	0.03	0.03	0.03	0.03	0.03	2.37876	0.00614933	0.105781	0.325136	1.35195	0.435038	7.3162	2.87109	827	666	222	pti:PHATRDRAFT_43251	Arf1; hypothetical protein; K07977 Arf/Sar family, other		K07977	Arf/Sar family, other			5525	B7FR50	KOG0070	GTP-binding ADP-ribosylation factor Arf1	Intracellular trafficking, secretion, and vesicular transport	CELLULAR PROCESSES AND SIGNALING	CAMPEP_0199332744-CAMNT_0045085285	89	TIGR00231: small_GTP: small GTP-binding protein domain PF00025.16: ADP-ribosylation factor family PF09439.5: Signal recognition particle receptor beta subunit		Nitzschia punctata, Strain CCMP561
contig_1835545_1_522_-	0.03	0.03	0.03	0.03	0.03	0.03	0.03	0.03	0.03	0.03	0.76618	0.03	0.03	0.03	0.03	0.03	0.03	0.03	0.03	0.03	0.629338	0.00657916	0.11262	0.0935961	0.361467	-1.46806	6.72398	2.74931	522	522	174	geo:Geob_1098	peptidoglycan-associated lipoprotein; K03640 peptidoglycan-associated lipoprotein		K03640	peptidoglycan-associated lipoprotein			9279	B9M348					JCVI_PEP_metagenomic.orf.1126664256342.1-SAR324	53			SAR324 cluster bacterium JCVI-SC AAA005
contig_394417_33_917_-	0.03	0.03	0.03	0.03	0.03	0.03	0.03	0.03	0.467561	0.03	0.03	0.03	0.03	0.03	0.03	0.03	0.03	0.03	0.03	0.03	0.383508	0.00686286	0.116903	0.0676699	0.225589	-2.14823	5.66733	2.50267	1011	885	295	rpa:RPA1395	trehalose/maltose binding protein; K02027 multiple sugar transport system substrate-binding protein		K02027	multiple sugar transport system substrate-binding protein				Q6N9Z1					gi126737993-NZ_AAYC01000002	46	putative trehalose/maltose binding protein	CAM_CRCL_4021311	Roseobacter SK209-2-6
contig_438454_364_865_+	0.03	0.03	0.03	0.03	0.03	0.03	0.03	0.03	0.03	0.03	0.03	0.03	0.03	0.03	0.03	0.03	0.280074	0.03	2.33255	0.03	1.89965	0.0069326	0.117518	0.240585	1.07012	0.0977674	7.89597	2.98112	865	502	167.333	pmg:P9301_03061	fabI; enoyl-(acyl carrier protein) reductase (EC:1.3.1.9); K00208 enoyl-[acyl-carrier protein] reductase I [EC:1.3.1.9]	pmg01100||pmg00061	K00208	enoyl-[acyl-carrier protein] reductase I [EC:1.3.1.9 1.3.1.10]	Fatty acid biosynthesis || Biotin metabolism || Fatty acid metabolism	1.3.1.9	4318	A3PB04					gi488894328-NZ_DS999537	100	enoyl-ACP reductase	CAM_CRCL_788	Prochlorococcus marinus str. MIT 9202
contig_432391_96_1052_+	0.03	0.03	0.03	0.03	0.03	0.03	0.261654	0.03	0.03	0.03	0.03	0.03	0.03	0.03	0.03	0.188179	0.03	0.29708	0.03	0.177303	0.356912	0.00731807	0.123453	0.0838632	0.220387	-2.18189	4.25588	2.08946	1258	957	319	pgv:SL003B_3813	oppA9; ABC-type dipeptide/oligopeptide/nickel transport systems, periplasmic components; K02035 peptide/nickel transport system substrate-binding protein	pgv02010	K02035	peptide/nickel transport system substrate-binding protein									SL003B_3813-NC_015259	30	oppA9; peptide ABC transporters, periplasmic components; K02035 peptide/nickel transport system substrate-binding protein	CAM_CRCL_7791	Polymorphum gilvum SL003B-26A1
contig_1480450_24_674_-	0.03	0.03	0.03	0.384933	0.32015	0.03	0.370542	0.03	0.03	0.609504	0.620301	0.03	0.404415	0.03	0.03	0.03	0.222837	0.22631	0.740219	0.246542	0.99115	0.00800429	0.13438	0.2589	0.625025	-0.678014	3.82831	1.93671	674	651	217	pgv:SL003B_2004	Amino acid ABC transporter, periplasmic amino acid-binding protein; K09969 general L-amino acid transport system substrate-binding protein	pgv02010	K09969	general L-amino acid transport system substrate-binding protein	ABC transporters								JCVI_PEP_metagenomic.orf.1126664265254.1-SAR324	60		CAM_CRCL_3107	SAR324 cluster bacterium JCVI-SC AAA005
contig_1998018_344_988_-	0.03	0.03	0.03	0.03	0.322849	0.305775	0.03	0.03	0.03	0.03	0.03	0.03	0.03	0.03	0.505312	0.03	0.03	0.03	0.03	0.03	0.515046	0.00826781	0.13814	0.102809	0.308927	-1.69466	5.00975	2.32474	1236	645	215	sur:STAUR_5107	MotA/TolQ/ExbB proton channel family protein						0006810||0008565||0016020	E3FI89					gi149918348-NZ_ABCS01000012	56	MotA/TolQ/ExbB proton channel	CAM_CRCL_3315	Plesiocystis pacifica SIR-1
contig_1665302_1_599_+	0.03	0.03	0.03	0.03	0.345338	0.03	0.03	0.03	0.03	0.03	0.03	0.404914	0.436918	0.03	0.285907	0.03	0.03	0.03	0.03	0.03	0.552294	0.00896039	0.148999	0.119303	0.335799	-1.57433	4.62933	2.2108	599	599	199.667								0005215||0006810						PSE_0114-NC_016642	40	proX; glycine betaine-binding protein		Pseudovibrio FO-BEG1
contig_1228550_1223_1883_+	0.03	0.03	0.03	0.03	0.03	0.03	0.70078	0.03	0.03	0.03	0.611371	0.03	0.39875	0.642789	0.03	0.488025	0.21992	0.03	0.379737	0.243266	0.976609	0.00934848	0.154715	0.239107	0.607858	-0.718193	4.0844	2.03013	1884	661	220.333	gpb:HDN1F_31560	fliC; putative flagellin; K02406 flagellin	gpb02040||gpb02020	K02406	flagellin	Two-component system || Flagellar assembly || Plant-pathogen interaction || Salmonella infection || Legionellosis		0005198||0006928||0009288||0044781||0071973						HDN1F_31560-NC_014366	47	fliC; putative flagellin; K02406 flagellin	CAM_CRCL_34374	gamma proteobacterium HdN1
contig_1618186_1_1210_+	0.03	0.03	0.03	0.22096	0.186105	0.471012	0.396434	0.03	0.670069	0.03	0.347592	0.401196	0.231441	0.197378	0.283369	0.03	0.03	0.135618	0.03	0.37951	0.805672	0.00945906	0.155807	0.236493	0.521083	-0.940416	3.40675	1.76839	1611	1210	403.333														or1743-POR4G_contig00100standard	35	ABC-type Fe3+-hydroxamate transport system, periplasmic component		Poribacteria WGA-4G
contig_2012296_1_574_-	3.1193	0.03	0.03	0.432546	0.359072	1.57943	2.34734	0.03	1.37927	2.65897	1.36898	0.421243	0.454641	1.44134	1.09821	1.61234	1.12353	0.920578	0.835492	0.766771	3.8453	0.0098102	0.160832	1.23116	2.53823	1.34382	3.12331	1.64308	574	574	191.333	nhl:Nhal_2336	flagellin domain protein; K02406 flagellin	nhl02020||nhl02040	K02406	flagellin	Two-component system || Flagellar assembly || Plant-pathogen interaction || Salmonella infection || Legionellosis		0005198||0009288||0071973	D5BV74					Nhal_2336-NC_013960	46	flagellin domain protein; K02406 flagellin	CAM_CRCL_34374	Nitrosococcus halophilus Nc4
contig_316677_971_1816_-	0.03	0.03	0.03	0.03	0.03	0.03	0.03	0.03	0.03	0.47593	0.03	0.03	0.03	0.03	0.03	0.03	0.178389	0.181061	0.03	0.03	0.399804	0.0104473	0.170477	0.083104	0.241454	-2.05018	4.81089	2.2663	1817	846	282	das:Daes_1622	phage tail sheath protein; K06907		K06907	uncharacterized protein				E6VXS8					gi61806001-NC_006883	89	18 tail sheath protein	CAM_CRCL_32412984	Prochlorococcus phage P-SSM2
contig_1619119_1_999_+	0.03	0.03	0.03	0.03	0.03	0.03	0.03	0.03	0.03	0.03	0.03	0.254798	0.03	0.03	0.03	0.03	0.658314	0.413778	0.261408	0.31222	0.656335	0.0107102	0.173953	0.143183	0.399759	-1.3228	4.58387	2.19657	1781	999	333	pla:Plav_2933	O-acetylhomoserine aminocarboxypropyltransferase (EC:2.5.1.49); K01740 O-acetylhomoserine (thiol)-lyase [EC:2.5.1.49]	pla01100||pla00270	K01740	O-acetylhomoserine (thiol)-lyase [EC:2.5.1.49]	Cysteine and methionine metabolism	2.5.1.49	0003961||0030170	A7HXA7					CAMPEP_0190316808-CAMNT_0034052307	67	TIGR01326: OAH_OAS_sulfhy: O-acetylhomoserine aminocarboxypropyltransferase/cysteine synthase PF01053.15: Cys/Met metabolism PLP-dependent enzyme PF01041.12: DegT/DnrJ/EryC1/StrS aminotransferase family		Oxyrrhis marina
contig_1191359_1411_1884_-	0.03	0.03	0.03	0.03	0.03	0.03	0.03	0.03	0.03	0.03	0.03	0.03	0.03	0.03	0.03	0.03	0.03	0.03	0.03	0.922208	0.69003	0.0110402	0.178483	0.103916	0.396973	-1.33289	6.64026	2.73124	2989	474	158								0016491||0055114						or3066-POR4E_contig00324standard	69	Aerobic-type carbon monoxide dehydrogenase, middle subunit CoxM/CutM homologs		Poribacteria WGA-4E
contig_1374853_1_793_+	0.03	0.03	0.03	0.03	0.03	0.254306	0.03	0.03	0.03	0.981467	0.999196	0.03	0.03	0.285393	0.416603	0.602675	0.188307	0.191158	0.321521	0.5633	1.21356	0.0111867	0.180018	0.300833	0.757196	-0.401261	4.034	2.01221	793	793	264.333	sno:Snov_0104	ABC transporter; K02055 putative spermidine/putrescine transport system substrate-binding protein		K02055	putative spermidine/putrescine transport system substrate-binding protein				D7A0T1					SYN7509DRAFT_0148-SYN7509DRAFT_scaffold4.4	48	Spermidine/putrescine-binding periplasmic protein		Synechocystis PCC 7509
contig_234808_1_1000_-	0.03	0.03	0.03	0.03	0.03	0.03	0.03	0.03	0.03	0.03	1.18286	0.03	0.03	0.03	0.03	0.484132	0.03	0.03	0.03	0.311938	0.968563	0.0113031	0.181057	0.164642	0.566603	-0.81959	5.88283	2.55651	1001	1000	333.333	eba:ebA5358	ompC; outer membrane protein (porin)							Q5P0J7					ebA5358-NC_006513	40	ompC; outer membrane protein (porin)	CAM_CRCL_32370105	Aromatoleum aromaticum EbN1
contig_390854_1_880_+	0.03	0.03	0.03	0.03	0.03	0.03	0.03	0.03	0.470047	0.03	0.466689	0.03	0.03	0.260144	0.378382	0.374039	0.172656	0.32045	0.555401	0.03	0.741033	0.011953	0.190592	0.195183	0.468108	-1.09509	3.79661	1.92471	1155	880	293.333	bmr:BMI_I1120	clpX; ATP-dependent protease ATP-binding subunit ClpX; K03544 ATP-dependent Clp protease ATP-binding subunit ClpX		K03544	ATP-dependent Clp protease ATP-binding subunit ClpX	Cell cycle - Caulobacter		0005524||0009368||0051082	C7LC61					C882_4207-GCA_000315795.1_contig7	76	ATP-dependent Clp protease ATP-binding subunit ClpX		Caenispirillum salinarum AK4
contig_1612028_1_614_-	0.03	0.03	0.03	0.406321	0.645268	0.319698	0.391063	0.03	0.660687	0.644425	0.655873	0.395755	0.426977	0.689697	0.279655	0.276543	0.438916	0.23814	0.406509	0.489182	1.04907	0.0121101	0.192221	0.40637	0.72772	-0.458545	2.58156	1.36824	614	614	204.667	sil:SPO0519	glutamate/glutamine/aspartate/asparagine ABC transporter, periplasmic substrate-binding protein; K09969 general L-amino acid transport system substrate-binding protein	sil02010	K09969	general L-amino acid transport system substrate-binding protein	ABC transporters			Q5LW24					SPO0519-NC_003911	66	glutamate/glutamine/aspartate/asparagine ABC transporter, periplasmic substrate-binding protein; K09969 general L-amino acid transport system substrate-binding protein	CAM_CRCL_31617888	Ruegeria pomeroyi DSS-3
contig_1610716_1_675_-	0.03	0.03	0.03	0.03	0.03	0.03	0.03	0.03	0.03	1.1478	0.599313	0.03	0.03	0.03	0.03	0.03	0.587943	0.21933	1.39993	0.03	1.42046	0.0129781	0.204143	0.277371	0.848917	-0.236304	5.12118	2.35648	1048	675	225	pmn:PMN2A_0875	cell division protein FtsZ; K03531 cell division protein FtsZ		K03531	cell division protein FtsZ	Cell cycle - Caulobacter		0000910||0003924	Q46JG2					PMN2A_0875-NC_007335	90	cell division protein FtsZ; K03531 cell division protein FtsZ	CAM_CRCL_31970032	Prochlorococcus marinus str. NATL2A
contig_306122_91_870_-	0.03	0.03	0.03	0.03	0.75649	0.486089	0.882664	1.16548	2.51232	4.38296	2.0007	0.317915	0.342492	1.0686	0.423047	1.00037	0.67378	0.521531	0.91914	1.2951	4.04095	0.0129614	0.204143	1.09093	2.56594	1.35949	3.70412	1.88913	1960	780	260	apb:SAR116_0451	glutamate/glutamine/aspartate/asparagine ABC transporter periplasmic substrate-binding protein (EC:4.2.1.51); K09969 general L-amino acid transport system substrate-binding protein	apb02010	K09969	general L-amino acid transport system substrate-binding protein	ABC transporters			D5BQY0					SAR116_0451-NC_014010	72	glutamate/glutamine/aspartate/asparagine ABC transporter periplasmic substrate-binding protein (EC:4.2.1.51); K09969 general L-amino acid transport system substrate-binding protein	CAM_CRCL_3107	Puniceispirillum marinum IMCC1322
contig_1717080_1_465_-	0.03	0.03	0.03	0.03	0.03	0.03	0.03	0.03	0.03	0.841305	0.03	0.03	0.03	0.03	0.03	0.03	0.299972	0.304834	0.03	0.333159	0.702805	0.0137704	0.215633	0.141051	0.421928	-1.24493	4.98262	2.31691	465	465	155														CAMPEP_0170491028-CAMNT_0010766531	60			Strombidium inclinatum
contig_1720670_1_997_-	0.03	0.03	0.03	0.03	0.03	0.03	0.03	0.918341	0.03	0.03	0.03	0.03	0.03	0.03	0.03	0.03	0.03	0.03	0.03	0.03	0.657592	0.0140335	0.218773	0.102187	0.379889	-1.39635	6.43516	2.68598	1491	997	332.333	vcn:VOLCADRAFT_109786 || vcn:VOLCADRAFT_77526	tubA2; alpha tubulin; K07374 tubulin alpha || tubA1; alpha tubulin						3924		KOG1376	Alpha tubulin	Cytoskeleton	CELLULAR PROCESSES AND SIGNALING	CAMPEP_0189981714-CAMNT_0033668785	92	PF00091.20: Tubulin/FtsZ family, GTPase domain PF03953.12: Tubulin C-terminal domain		Lingulodinium polyedra CCMP1738
contig_1346799_1_769_+	0.03	0.03	0.03	0.03	0.03	0.03	0.03	0.03	0.533565	0.03	0.03	0.03	0.03	0.03	0.229334	0.226849	0.03	0.03	0.03	0.03	0.436833	0.014379	0.223162	0.0922182	0.264525	-1.91852	4.73695	2.24396	769	769	256.333								0005524||0006457||0006950||0051082		KOG0019	Molecular chaperone (HSP90 family)	Posttranslational modification, protein turnover, chaperones	CELLULAR PROCESSES AND SIGNALING	CAMPEP_0192584306-CAMNT_0036791819	79	PF00183.13: Hsp90 protein PF02518.21: Histidine kinase-, DNA gyrase B-, and HSP90-like ATPase		Symbiodinium sp Mp
contig_437589_1_730_-	0.03	0.03	2.32708	0.03	0.03	0.03	0.03	0.03	0.03	0.54679	0.03	0.03	0.03	1.41717	1.70987	0.444732	1.40575	0.730263	1.29672	0.223108	2.60141	0.0144522	0.223305	0.620614	1.61101	0.687965	4.19167	2.06752	730	730	243.333	tet:TTHERM_00836580 || tet:TTHERM_00348510	Tubulin/FtsZ family, GTPase domain containing protein; K07375 tubulin beta || Tubulin beta chain, putative; K07375 tubulin beta						3924		KOG1375	Beta tubulin	Cytoskeleton	CELLULAR PROCESSES AND SIGNALING	ac04537-ac	93	beta-tubulin	CAM_CRCL_4007620	Alexandrium catenella, Strain OF101
contig_1303450_1_491_-	0.03	0.03	0.03	0.500593	0.414699	0.754541	0.933025	0.03	0.818679	0.03	1.59532	0.03	0.03	0.854957	1.27878	0.954911	1.05271	0.290281	0.03	0.317106	1.94153	0.0145606	0.223989	0.568911	1.25522	0.327943	3.41272	1.77092	608	491	163.667	nde:NIDE3237	nxrA1; putative nitrate oxidoreductase subunit alpha (EC:1.7.99.4); K00370 nitrate reductase 1, alpha subunit [EC:1.7.99.4]	nde02020||nde00910||nde01120	K00370	nitrate reductase alpha subunit [EC:1.7.99.4]	Nitrogen metabolism || Two-component system	1.7.99.4	0008940||0016491||0055114						kustd1700-CT573072	54	similar to nitrate reductase subunit NarG	CAM_CRCL_5216	Kuenenia stuttgartiensis
contig_1727684_1_1100_+	1.64205	0.03	0.03	0.240056	0.373432	0.353409	0.03	0.03	0.382038	1.40184	0.379351	0.234158	0.473171	0.582346	0.587412	0.442847	1.28537	0.72708	1.50112	0.158153	2.02089	0.0152062	0.231877	0.614511	1.3177	0.398023	3.28862	1.71748	1156	1100	366.667								0005524||0006457||0006950||0051082		KOG0019	Molecular chaperone (HSP90 family)	Posttranslational modification, protein turnover, chaperones	CELLULAR PROCESSES AND SIGNALING	CAMPEP_0188994652-CAMNT_0032496839	81	PF00183.13: Hsp90 protein PF02518.21: Histidine kinase-, DNA gyrase B-, and HSP90-like ATPase		Karenia brevis CCMP2229
contig_1807879_486_932_-	0.03	0.03	0.03	0.03	0.03	0.03	0.03	0.03	0.03	1.71795	0.03	0.03	0.03	0.03	0.03	0.03	0.03	0.03	0.547173	0.9761	1.4298	0.0151713	0.231877	0.246715	0.838256	-0.254538	5.79533	2.53489	2245	447	149	aba:Acid345_0150	biopolymer transport protein ExbD/TolR						0005215||0006810||0016020	Q1IVE5					Acid345_0150-NC_008009	30	biopolymer transport protein ExbD/TolR	CAM_CRCL_33828681	Koribacter versatilis Ellin345
contig_1466180_185_1060_+	0.03	0.03	0.03	0.03	0.03	0.03	0.03	0.03	0.03	0.03	0.907366	0.03	0.03	0.03	0.03	0.202805	0.03	0.175888	0.03	0.51277	0.744279	0.0154879	0.235147	0.143958	0.444118	-1.17098	5.17013	2.3702	1124	876	292	cob:COB47_0634	S-adenosylmethionine synthetase (EC:2.5.1.6); K00789 S-adenosylmethionine synthetase [EC:2.5.1.6]	cob00270||cob01110||cob01100	K00789	S-adenosylmethionine synthetase [EC:2.5.1.6]	Cysteine and methionine metabolism || Biosynthesis of amino acids	2.5.1.6	0004478||0006556	D9TIW8					COB47_0634-NC_014392	68	S-adenosylmethionine synthetase (EC:2.5.1.6); K00789 S-adenosylmethionine synthetase [EC:2.5.1.6]	CAM_CRCL_741	Caldicellulosiruptor obsidiansis OB47
contig_358581_1_750_-	0.03	0.03	0.03	0.03	0.03	0.03	0.03	0.03	0.03	0.03	0.542382	0.628863	0.03	0.300036	0.643153	0.635509	1.0343	0.541192	0.03	0.969792	1.28142	0.0158111	0.239014	0.330316	0.805867	-0.311387	3.87937	1.95582	750	750	250								3924		KOG1376	Alpha tubulin	Cytoskeleton	CELLULAR PROCESSES AND SIGNALING	CAMPEP_0202705036-CAMNT_0049363183	67	PF00091.20: Tubulin/FtsZ family, GTPase domain PF03953.12: Tubulin C-terminal domain		Elphidium margaritaceum
contig_1257272_135_935_-	0.03	0.03	0.03	0.03	0.03	0.03	0.03	0.03	0.03	0.03	0.03	0.03	0.03	0.03	0.03	0.03	0.500177	0.349096	0.03	0.03	0.42058	0.0165897	0.249703	0.0861835	0.253382	-1.98062	4.88005	2.2869	1139	801	267	pmc:P9515_05461	hflC; band 7 protein							A2BVE4					P9515_05461-NC_008817	88	hflC; band 7 protein	CAM_CRCL_4013343	Prochlorococcus marinus str. MIT 9515
contig_1872463_1_777_+	0.03	0.03	0.03	0.03	0.03	0.03	0.03	0.03	0.03	0.03	0.03	0.03	0.03	0.290652	0.227282	0.224823	0.353133	0.358952	0.03	0.03	0.432644	0.01701	0.25493	0.111309	0.271976	-1.87845	3.88688	1.95861	1011	777	259														CAMPEP_0199438916-CAMNT_0045255723	86			Ceratium fusus, Strain PA161109
contig_1633570_261_589_-	0.03	0.03	0.03	2.13694	0.604126	0.570653	1.37768	0.03	1.20703	2.32335	2.36609	0.712594	0.770863	0.645583	0.961843	0.950226	0.411572	0.806887	0.732663	0.886953	2.88278	0.0171714	0.256251	0.974658	1.92872	0.947641	2.95773	1.56449	589	329	109.667	slo:Shew_0060	4Fe-4S ferredoxin iron-sulfur binding domain-containing protein; K00124 formate dehydrogenase, beta subunit [EC:1.2.1.2]	slo01120||slo00680||slo00630||slo01100	K00124	formate dehydrogenase iron-sulfur subunit	Glyoxylate and dicarboxylate metabolism || Methane metabolism || Carbon metabolism	1.2.1.2	0008863||0051536	A3Q8Y5					Shew_0060-NC_009092	76	4Fe-4S ferredoxin iron-sulfur binding domain-containing protein; K00124 formate dehydrogenase, beta subunit [EC:1.2.1.2]	CAM_CRCL_4293	Shewanella loihica PV-4
contig_931176_1_872_-	0.03	0.03	0.03	0.03	0.03	0.03	0.03	0.03	0.03	0.03	0.03	0.03	0.03	0.03	0.03	0.03	0.03	0.03	0.03	1.64662	1.10633	0.0189204	0.281149	0.158236	0.632285	-0.661354	6.99168	2.80564	1142	872	290.667	pmc:P9515_17021	psaB; photosystem I P700 chlorophyll a apoprotein A2; K02690 photosystem I P700 chlorophyll a apoprotein A2	pmc00195||pmc01100	K02690	photosystem I P700 chlorophyll a apoprotein A2	Photosynthesis		0009522||0009579||0015979||0016021	A2BYP8					P9515_17021-NC_008817	98	psaB; photosystem I P700 chlorophyll a apoprotein A2; K02690 photosystem I P700 chlorophyll a apoprotein A2	CAM_CRCL_2586	Prochlorococcus marinus str. MIT 9515
contig_2039911_1_886_-	0.03	0.03	0.03	0.290791	0.243191	0.632285	0.03	2.02927	0.467067	0.03	0.463732	0.03	0.03	0.487171	0.203011	0.371709	0.17169	0.895449	0.03	1.30286	1.79554	0.0194182	0.286111	0.456846	1.12619	0.171457	3.9303	1.97464	1060	886	295.333														YUODRAFT_06721-YUODRAFT_scaffold_68.69	62	ABC-type dipeptide transport system, periplasmic component		Bradyrhizobium elkanii WSM1741
contig_381470_1_336_+	0.03	0.03	0.03	0.03	0.592165	0.03	0.03	0.03	0.03	0.03	0.03	0.03	0.03	0.632759	0.94243	0.480527	0.03	0.410351	0.03	0.44955	0.961114	0.0194166	0.286111	0.232805	0.596959	-0.744295	4.12842	2.04559	336	336	112														AAA07O23_00573-AAA07O23_contig_66_0.32	92	hypothetical protein		Thaumarchaeota archaeon SCGC AAA007-O23
contig_3011_169_819_+	0.03	0.03	0.03	0.03	0.03	0.03	0.03	0.03	0.03	1.18901	0.03	0.03	0.03	0.03	0.265466	0.727591	0.415675	0.22631	0.03	0.246542	0.99115	0.0197308	0.289496	0.213416	0.602283	-0.731486	4.64421	2.21543	819	651	217														CAMPEP_0200037762-CAMNT_0045964125	49			Durinskia baltica, Strain CSIRO CS-38
contig_1722537_1_270_-	13.1652	7.43107	24.8725	0.03	2.12875	1.34759	0.03	6.59056	0.03	0.03	1.45328	0.03	0.03	1.5302	0.03	0.03	0.959905	0.503326	1.74242	4.20685	19.7282	0.0208079	0.304022	4.09047	11.9094	3.57402	4.82297	2.26992	489	270	90	apb:SAR116_0125	histone family protein DNA-binding protein (EC:5.4.99.12); K03530 DNA-binding protein HU-beta		K03530	DNA-binding protein HU-beta			3677	D5BP86					SAR116_0125-NC_014010	82	histone family protein DNA-binding protein (EC:5.4.99.12); K03530 DNA-binding protein HU-beta	CAM_CRCL_92	Puniceispirillum marinum IMCC1322
contig_872633_1_780_-	0.03	0.03	0.03	0.03	0.03	0.03	0.03	0.03	0.03	0.513663	0.03	0.03	0.03	0.03	0.03	0.03	0.190945	0.193844	0.32638	0.03	0.431095	0.0209526	0.304861	0.101711	0.266403	-1.90832	4.23844	2.08353	1203	780	260								0005215||0006810						HIMB5_00009350-NC_018643	94	carbohydrate ABC transporter substrate-binding protein		alpha proteobacterium HIMB5
contig_1601146_1_1011_+	0.03	0.03	0.03	0.03	0.03	0.03	0.03	0.03	0.03	0.03	0.03	0.03	0.03	0.03	0.03	0.03	0.03	0.03	0.487322	0.169435	0.33945	0.0223172	0.322032	0.0731527	0.206302	-2.27717	4.6403	2.21422	1907	1011	337	hba:Hbal_0963	chaperonin GroEL; K04077 chaperonin GroEL	hba03018	K04077	chaperonin GroEL	RNA degradation || Longevity regulating pathway - worm || Type I diabetes mellitus || Legionellosis || Tuberculosis		0005524||0044267	C6XQQ1					A03E22DRAFT_00120-A03E22DRAFT_contig_52_0.53	72	chaperonin GroL		Marinimicrobia bacterium SCGC AAA003-E22
contig_655260_83_340_-	0.03	0.03	0.03	0.03	0.03	0.03	0.03	0.03	0.03	0.03	0.03	0.03	0.03	0.03	0.03	0.03	0.03	0.03	1.82206	0.576391	1.24261	0.0223172	0.322032	0.199099	0.720856	-0.472217	6.2412	2.64182	340	258	86	nwi:Nwi_2461	hypothetical protein							Q3SPS7					A3AMDRAFT_00886-A3AMDRAFT_scaffold_84.85	54	Uncharacterized conserved protein		Bradyrhizobium elkanii USDA 3254
contig_1193853_1_887_-	0.03	0.03	0.03	0.03	0.03	0.03	0.03	0.03	0.03	0.455318	0.03	0.03	0.03	0.03	0.03	0.371324	0.03	0.03	0.03	0.03	0.382711	0.0226072	0.324235	0.0833025	0.233007	-2.10156	4.59423	2.19982	3052	887	295.667								0004872||0006810||0016020						gi88858231-NZ_AAOH01000002	52	TonB-dependent receptor	CAM_CRCL_32661726	Pseudoalteromonas tunicata D2
contig_457949_1_566_+	0.03	0.03	0.03	0.03	0.03	0.03	0.03	0.03	0.03	0.696531	1.3879	0.426773	0.03	0.03	0.03	0.297451	0.251797	0.255791	0.438439	0.528123	1.13549	0.0226556	0.324235	0.275157	0.705325	-0.50364	4.12671	2.04499	566	566	188.667	apb:SAR116_1458	Leu/Ile/Val-binding protein (EC:3.4.22.34); K01999 branched-chain amino acid transport system substrate-binding protein	apb02010	K01999	branched-chain amino acid transport system substrate-binding protein	ABC transporters			D5BTV4					HIMB100_00022370-GCA_000238815.2_contig10	75	ABC-type branched-chain amino acid transport system, periplasmic component		SAR116 cluster alpha proteobacterium HIMB100
contig_406307_1_815_-	0.03	0.03	0.03	0.03	0.03	0.03	0.03	0.03	0.03	0.03	0.03	0.03	0.03	0.03	0.03	0.03	0.184033	0.03	0.597304	1.06781	0.797741	0.0231998	0.330669	0.150328	0.474034	-1.07694	5.30667	2.40781	902	815	271.667	rli:RLO149_c027190	groEL; chaperon GroEL; K04077 chaperonin GroEL	rli03018	K04077	chaperonin GroEL	RNA degradation || Longevity regulating pathway - worm || Type I diabetes mellitus || Legionellosis || Tuberculosis		0005524||0044267						RLO149_c027190-NC_015730	81	groEL; chaperon GroEL; K04077 chaperonin GroEL	CAM_CRCL_36	Roseobacter litoralis Och 149
contig_437753_149_670_+	1.72852	0.03	0.03	0.472646	0.03	0.711513	0.454699	0.03	1.51368	0.03	0.76618	0.03	0.03	0.417983	0.617311	0.899984	0.751478	0.03	0.915733	0.03	1.82801	0.0235363	0.334101	0.540369	1.18419	0.243902	3.3829	1.75826	670	522	174														PB7211_1204-NZ_DS995298	78	ABC transporter	CAM_CRCL_31617888	Pelagibacter HTCC7211
contig_879887_1_698_+	0.03	0.03	0.03	0.03	0.03	0.284835	0.03	0.03	0.03	0.570483	0.03	0.03	0.03	0.03	0.03	0.03	0.03	0.396183	0.03	0.03	0.478215	0.0239485	0.338576	0.106653	0.292434	-1.77382	4.48384	2.16473	698	698	232.667	pgv:SL003B_0823	Twin-arginine translocation pathway signal						0006810||0030288						gi126727350-NZ_AAXZ01000009	75	twin-arginine translocation pathway signal	CAM_CRCL_6076	Rhodobacteraceae bacterium HTCC2150
contig_1532988_1_545_-	0.03	0.03	0.03	0.03	0.03	0.03	0.843551	0.03	0.03	0.03	0.03	0.03	0.03	0.03	0.311263	0.307756	0.03	0.03	0.03	0.03	0.604045	0.0249032	0.350654	0.122696	0.36337	-1.46049	4.9231	2.29957	545	545	181.667														HIMB5_00006000-NC_018643	73	amino acid ABC transporter substrate-binding protein		alpha proteobacterium HIMB5
contig_1900164_1_309_-	0.03	0.03	0.03	0.03	0.03	0.03	0.03	0.03	0.03	0.03	0.03	0.03	0.03	1.34085	2.01431	1.00979	1.65508	0.03	0.778143	0.94242	2.05495	0.0256403	0.359581	0.486454	1.2707	0.345625	4.22434	2.07873	309	309	103	tet:TTHERM_00836580 || tet:TTHERM_00348510	Tubulin/FtsZ family, GTPase domain containing protein; K07375 tubulin beta || Tubulin beta chain, putative; K07375 tubulin beta												CAMPEP_0186786868-CAMNT_0029669793	100	TIGR00065: ftsZ: cell division protein FtsZ PF00091.20: Tubulin/FtsZ family, GTPase domain PF03953.12: Tubulin C-terminal domain		Azadinium spinosum 3D9
contig_1802271_1_665_+	0.03	0.03	0.03	4.89445	4.57466	4.04221	4.69721	5.35737	1.77695	5.13573	6.38661	4.75786	5.52799	4.90283	3.94865	2.98925	2.10655	3.10484	2.1158	5.32958	8.49824	0.0292632	0.40712	3.8208	6.15952	2.62282	2.2242	1.15329	783	665	221.667								0005215||0006810						ORF0112-A76E13DRAFT_NODE	71	IMG gene_oid=2236435711		gamma proteobacterium SCGC AAA076-E13
contig_1869479_1_403_-	0.03	0.03	0.03	0.03	0.03	0.03	0.03	0.03	0.03	0.03	0.03	0.03	0.03	0.03	0.03	0.03	3.76808	0.664233	0.03	0.379799	2.35894	0.0292549	0.40712	0.365764	1.36235	0.4461	6.44935	2.68915	403	403	134.333	tps:THAPSDRAFT_6139	hypothetical protein							B8C5N8					CAMPEP_0198625582-CAMNT_0044359019	78	PF00504.16: Chlorophyll A-B binding protein		Phaeocystis cordata
contig_1633989_409_1002_+	0.03	0.03	0.03	0.03	0.347992	0.03	0.03	0.03	0.681922	0.665112	1.32389	0.03	0.03	0.370954	0.546122	0.284844	0.03	0.03	0.03	0.03	1.08338	0.0299368	0.414165	0.271153	0.677268	-0.562202	3.99546	1.99836	1594	594	198	pub:SAR11_1346	livJ; hypothetical protein; K01999 branched-chain amino acid transport system substrate-binding protein	pub02010	K01999	branched-chain amino acid transport system substrate-binding protein	ABC transporters			Q4FKY9					PB7211_130-NZ_DS995298	91	receptor family ligand-binding protein	CAM_CRCL_31612877	Pelagibacter HTCC7211
contig_1826524_1_669_+	0.03	0.03	0.03	0.375383	0.877028	1.89117	1.02414	0.03	0.608836	0.03	0.604419	0.701371	0.758682	1.24092	0.717391	0.935095	0.780596	1.17617	0.375555	3.61217	2.83587	0.0300068	0.414165	0.8888	1.86233	0.897112	3.19067	1.67386	728	669	223														gi159176869-ABHC01000033	57	ABC transporter, substrate-binding protein, family 5	CAM_CRCL_28084	alpha proteobacterium BAL199
contig_1757532_378_864_+	0.03	0.03	0.03	0.504458	0.03	0.03	0.03	0.03	0.03	0.03	0.03	0.03	0.03	0.03	0.03	0.03	0.545553	0.817256	0.03	0.03	0.672411	0.0303463	0.417202	0.145223	0.408817	-1.29047	4.63021	2.21108	864	487	162.333														CAMPEP_0189871174-CAMNT_0033552621	56			Kryptoperidinium foliaceum CCMP1326
contig_2117885_298_573_+	22.517	7.27017	30.408	0.03	1.39875	0.03	0.833234	9.65691	2.8361	10.965	4.20702	0.03	0.913131	11.0369	3.91774	3.32081	10.9463	6.04947	25.1579	5.64832	29.5018	0.0305647	0.418556	8.88926	19.1955	4.2627	3.31881	1.73067	623	276	92	pmn:PMN2A_0892 || pme:NATL1_17471	histone-like DNA-binding protein; K03530 DNA-binding protein HU-beta || himA; histone-like DNA-binding protein; K03530 DNA-binding protein HU-beta		K03530	DNA-binding protein HU-beta			3677	A2C493					NATL1_17471-NC_008819	100	himA; histone-like DNA-binding protein; K03530 DNA-binding protein HU-beta	CAM_CRCL_36118051	Prochlorococcus marinus str. NATL1A
contig_1697111_70_444_-	2.39434	0.03	4.50164	0.03	0.03	0.03	0.03	4.7536	0.03	0.03	0.03	0.03	0.03	0.03	0.03	0.03	0.03	0.03	0.03	0.03	4.20139	0.0320463	0.437131	0.779094	2.49024	1.31629	5.39266	2.431	683	375	125	tet:TTHERM_00446290	hypothetical protein								KOG3961	Uncharacterized conserved protein	Function unknown	POORLY CHARACTERIZED	CAMPEP_0204605330-CAMNT_0051616561	71	PF10274.4: Parkin co-regulated protein		Alexandrium margalefi, Strain AMGDE01CS-322
contig_1299941_1226_2050_+	0.03	0.03	0.03	0.03	0.03	0.03	0.03	0.03	0.03	0.03	0.03	0.30221	0.325447	0.275487	0.215804	0.76395	0.486499	2.04379	1.15085	0.542614	1.54687	0.0332138	0.449546	0.380168	0.963519	-0.0536153	4.06891	2.02464	2367	825	275	del:DelCs14_0782	porin												gi149926723-NZ_ABCT01000005	56	Gram-negative porin	CAM_CRCL_24285	Limnobacter MED105
contig_2076776_1_885_-	0.03	0.03	0.03	0.291086	0.456864	0.230988	0.531	0.03	0.905122	0.882558	0.898443	0.03	0.03	0.258844	0.203207	0.543143	0.17185	0.463213	0.291216	0.667147	1.09052	0.0331105	0.449546	0.384057	0.73729	-0.439695	2.83948	1.50563	2181	885	295								0016491||0055114						AZKH_3902-NC_020516	36	iorB; isoquinoline 1-oxidoreductase, beta subunit		Azoarcus KH32C
contig_1925436_1_774_+	0.03	0.03	0.03	0.627057	0.03	0.489625	0.602849	0.03	0.03	0.03	0.03	0.03	0.65983	1.86164	0.62414	1.39904	0.192193	0.690455	0.03	0.940651	1.64682	0.036609	0.493586	0.477824	1.06232	0.0872201	3.4465	1.78513	839	774	258	tau:Tola_1962	putative spermidine/putrescine transport system substrate-binding protein; K02055 putative spermidine/putrescine transport system substrate-binding protein		K02055	putative spermidine/putrescine transport system substrate-binding protein				C4L7E5					Lepto7375DRAFT_2023-Lepto7375DRAFT_LPA.5	60	hypothetical protein		Leptolyngbya PCC 7375
contig_1269140_1_572_-	0.03	0.03	0.03	0.03	0.03	0.34097	0.805149	0.03	0.03	0.03	0.03	0.03	0.456126	0.03	0.03	0.03	0.03	0.03	0.03	0.03	0.576948	0.0373593	0.501764	0.128057	0.352503	-1.50429	4.50541	2.17166	572	572	190.667	rmr:Rmar_2364	hypothetical protein							D0MEL4					or2713-POR4E_contig00324standard	86	Uncharacterized protein conserved in bacteria		Poribacteria WGA-4E
contig_1807879_1012_1683_-	0.03	0.03	0.03	0.717682	0.873247	0.294695	1.0197	2.66594	2.33501	1.71418	2.31742	0.698374	0.392714	0.934138	0.03	0.255264	0.403623	1.93176	1.40605	2.96685	3.2889	0.0380575	0.509183	1.15884	2.22387	1.15307	2.83811	1.50493	2245	672	224	sus:Acid_1281	MotA/TolQ/ExbB proton channel; K03561 biopolymer transport protein ExbB		K03561	biopolymer transport protein ExbB			0006810||0008565||0016020	Q029K1					Acid_1281-NC_008536	49	MotA/TolQ/ExbB proton channel	CAM_CRCL_4001834	Solibacter usitatus Ellin6076
contig_89745_187_880_+	0.03	0.03	0.03	0.03	0.03	0.286304	0.349442	0.03	0.03	0.03	0.03	0.03	0.03	0.613651	0.03	0.03	0.210889	0.214147	0.03	0.233125	0.480799	0.038976	0.519481	0.133731	0.307265	-1.70244	3.59526	1.8461	880	694	231.333	apb:SAR116_0269	sugar ABC transporter periplasmic sugar-binding protein (EC:3.6.3.17); K02058 simple sugar transport system substrate-binding protein		K02058	simple sugar transport system substrate-binding protein				D5BQ14					HIMB100_00016910-GCA_000238815.2_contig10	69	ABC-type sugar transport system, periplasmic component		SAR116 cluster alpha proteobacterium HIMB100
contig_1167467_12_319_+	11.5447	0.03	0.03	1.5304	1.86981	1.76255	2.90913	5.78114	6.31639	8.60402	5.02073	0.03	0.821377	3.97533	4.01151	2.48742	2.47553	0.859857	3.03229	1.40307	10.1876	0.0396765	0.526808	3.55632	6.87197	2.78072	2.86465	1.51836	319	308	102.667	tet:TTHERM_00189170 || tet:TTHERM_00498190	Histone H4, minor, putative; K11254 histone H4 || Core histone H2A/H2B/H3/H4 family protein; K11254 histone H4						3677		KOG3467	Histone H4	Chromatin structure and dynamics	INFORMATION STORAGE AND PROCESSING	CAMPEP_0170486722-CAMNT_0010760743	91	PF00125.19: Core histone H2A/H2B/H3/H4		Strombidium inclinatum
contig_1474402_409_972_-	0.03	0.03	0.03	0.03	0.03	0.03	0.03	0.03	0.03	0.03	0.03	0.03	0.03	0.03	0.03	0.03	0.920335	0.03	0.439887	0.03	0.584706	0.0419982	0.555522	0.11833	0.351518	-1.50833	4.94132	2.3049	1316	564	188	pmc:P9515_16881	tufA, tuf; elongation factor Tu (EC:3.6.5.3); K02358 elongation factor Tu		K02358	elongation factor Tu			5525	A2BYN4					P9515_16881-NC_008817	86	tufA, tuf; elongation factor Tu (EC:3.6.5.3); K02358 elongation factor Tu	CAM_CRCL_30	Prochlorococcus marinus str. MIT 9515
contig_1251814_1_983_+	0.03	0.03	0.03	0.03	0.222154	0.210951	0.481053	0.930993	0.423938	0.03	0.03	0.486915	0.277959	0.442059	0.185939	0.183995	0.03	0.160008	0.03	1.89429	1.30306	0.0433731	0.571542	0.354443	0.828752	-0.270988	3.67635	1.87828	983	983	327.667	rle:pRL80026	livJ; putative branched-chain amino acid ABC transporter binding component; K01999 branched-chain amino acid transport system substrate-binding protein	rle02010	K01999	branched-chain amino acid transport system substrate-binding protein	ABC transporters			Q1M9I2					A33M_4045-GCA_000293785.1_contig83	42	Extracellular ligand-binding receptor		Rhodovulum PH10
contig_1783692_140_937_+	0.03	0.03	0.03	0.03	0.03	0.03	0.03	0.03	0.03	0.03	0.03	0.03	0.03	0.03	0.03	0.03	0.03	0.03	0.03	0.736611	0.422048	0.0436518	0.573054	0.0823171	0.252183	-1.98746	5.1271	2.35814	1859	798	266														POR3G_00051-POR3G_contig_303.304	52	Uncharacterized protein conserved in bacteria		Poribacteria WGA-3G
contig_1620506_3961_4872_-	0.03	0.03	0.03	0.03	0.237113	0.615114	0.03	0.03	0.03	0.03	0.03	0.03	0.03	0.03	0.03	0.03	0.03	0.03	0.03	0.03	0.373042	0.0462725	0.605182	0.0840605	0.228551	-2.12941	4.43778	2.14984	7510	912	304	vvu:VV1_1019 || vvy:VV3253	atpA; ATP synthase F1 subunit alpha (EC:3.6.3.14); K02111 F-type H+-transporting ATPase subunit alpha [EC:3.6.3.14] || F0F1 ATP synthase subunit alpha (EC:3.6.3.14); K02111 F-type H+-transporting ATPase subunit alpha [EC:3.6.3.14]	vvu00190||vvu01100	K02111	F-type H+-transporting ATPase subunit alpha [EC:3.6.3.14]	Oxidative phosphorylation || Photosynthesis	3.6.3.14	0000275||0005524||0015986||0015992||0045261||0045262||0046034||0046933	Q8DDH0					VV1_1019-NC_004459	93	atpA; ATP synthase F1 subunit alpha (EC:3.6.3.14); K02111 F-type H+-transporting ATPase subunit alpha [EC:3.6.3.14]	CAM_CRCL_33026284	Vibrio vulnificus CMCP6
contig_2058621_384_1049_+	0.03	0.03	0.03	0.03	0.313615	0.03	0.03	0.03	0.03	0.03	0.03	0.03	0.03	0.03	0.03	0.03	0.03	0.03	0.03	1.72332	0.969503	0.0474389	0.618121	0.168878	0.56919	-0.813017	5.74085	2.52126	1149	666	222	rle:pRL80026	livJ; putative branched-chain amino acid ABC transporter binding component; K01999 branched-chain amino acid transport system substrate-binding protein	rle02010	K01999	branched-chain amino acid transport system substrate-binding protein	ABC transporters			Q1M9I2					A33M_4045-GCA_000293785.1_contig83	55	Extracellular ligand-binding receptor		Rhodovulum PH10
contig_1183259_1_950_-	0.03	0.03	0.03	0.516445	0.427658	0.03	0.263361	0.03	0.437623	0.824225	0.03	0.03	0.03	0.243186	0.191356	0.348689	0.162144	0.03	0.03	0.326777	0.688641	0.0484571	0.629042	0.225243	0.456942	-1.12992	3.05732	1.61227	1105	950	316.667														AZKH_4030-NC_020516	53	livK; branched-chain amino acid ABC transporter system, substrate-binding protein		Azoarcus KH32C
contig_1512799_234_794_+	0.03	0.03	0.03	0.03	0.03	0.03	0.03	0.03	0.03	0.03	0.03	0.03	0.464481	0.752021	0.303241	0.299835	1.59642	0.941215	0.03	0.03	1.14535	0.0493611	0.638404	0.282026	0.713686	-0.486639	4.06113	2.02188	794	561	187	tin:Tint_0991	phasin family protein							D5WZ47					Tint_0991-NC_014153	53	phasin family protein	CAM_CRCL_4002299	Thiomonas intermedia K12
contig_361614_269_931_+	0.03	0.03	0.03	0.03	0.314898	0.298288	0.364378	0.03	0.614075	1.73704	1.76885	0.03	0.03	0.33547	0.03	0.258322	0.03	0.222757	0.03	0.03	1.44563	0.0497684	0.641296	0.366177	0.905904	-0.14257	3.9479	1.98109	931	663	221														RBY4I_1455-NZ_DS995281	71	polyamine ABC trasnporter, periplasmic polyamine-binding protein	CAM_CRCL_2606	Rhodobacterales bacterium Y4I
contig_1800650_1_1012_+	0.03	0.03	0.03	0.03	0.03	0.03	0.03	0.03	0.03	0.03	0.03	0.03	0.03	0.03	0.03	0.03	0.03	0.156283	0.03	0.587189	0.339145	0.0500478	0.642525	0.0772674	0.208206	-2.26392	4.38923	2.13397	1506	1012	337.333														vfu_A01533-CP002377	32	oligopeptide permease A protein	CAM_CRCL_16542	Vibrio furnissii NCTC 11218
contig_2116072_1583_2755_+	0.03	0.03	0.03	0.03	0.03	0.03	0.03	0.03	0.360129	0.03	0.03	0.03	0.03	0.03	0.291361	0.03	0.03	0.13895	0.227081	0.150178	0.296713	0.0520178	0.664925	0.0911625	0.193938	-2.36633	3.25477	1.70256	2757	1173	391								5515						or1743-POR4G_contig00100standard	40	ABC-type Fe3+-hydroxamate transport system, periplasmic component		Poribacteria WGA-4G
contig_807613_1_1633_-	0.03	0.03	0.03	0.03	0.03	0.03	0.03	0.03	0.03	0.03	0.03	0.03	0.03	0.03	0.03	0.03	0.260626	0.343038	0.313131	0.54795	0.413165	0.0521734	0.664925	0.112281	0.262723	-1.92838	3.67973	1.8796	4727	1633	544.333	nam:NAMH_0613	flgG; flagellar basal body rod protein FlgG; K02392 flagellar basal-body rod protein FlgG	nam02040	K02392	flagellar basal-body rod protein FlgG	Flagellar assembly			B9L8S1					CalpoDRAFT_0487-CalpoDRAFT_CPK.3	38	fagellar hook-basal body proteins		Caldanaerobius polysaccharolyticus DSM 13641
contig_670060_1_893_-	0.03	0.03	0.03	0.547494	1.0876	0.03	0.278256	0.03	0.897282	0.87492	0.890663	1.53889	0.848849	0.710381	0.716621	0.708061	0.170579	0.602443	0.288876	0.50358	1.43136	0.0570812	0.724828	0.583136	1.00725	0.0104217	2.45459	1.29548	1099	893	297.667														HIMB5_00009890-NC_018643	86	amino acid ABC transporter substrate-binding protein		alpha proteobacterium HIMB5
contig_1682023_1_630_-	0.03	0.03	0.03	0.03	0.03	0.312341	0.03	0.03	0.03	0.03	0.03	0.742932	0.416895	0.03	0.273315	0.03	0.03	0.232854	0.03	0.25376	0.526594	0.0583996	0.738882	0.151366	0.33898	-1.56073	3.47894	1.79865	1029	630	210	sta:STHERM_c14720	transmembrane protein							E0RTN7					or1979-POR4C_contig00106standard	35	hypothetical protein		Poribacteria WGA-4C
contig_1121478_2287_3009_+	0.03	0.03	0.03	0.03	0.03	0.03	0.03	0.03	0.565604	0.551794	0.03	0.03	0.03	0.03	0.03	0.03	0.03	0.03	0.349746	0.224978	0.462717	0.0638107	0.803417	0.125468	0.294093	-1.76566	3.68791	1.88281	3940	723	241	rba:RB8970	groEL; 60 kDa chaperonin 5; K04077 chaperonin GroEL	rba03018	K04077	chaperonin GroEL	RNA degradation || Longevity regulating pathway - worm || Type I diabetes mellitus || Legionellosis || Tuberculosis		0005524||0044267	Q7UM97					Psta_3025-NC_013720	73	chaperonin GroEL	CAM_CRCL_32430158	Pirellula staleyi DSM 6068
contig_710863_87_518_+	0.03	0.03	0.03	0.03	0.03	0.03	0.03	0.03	0.03	0.03	0.03	0.549846	0.594222	0.03	0.03	0.03	2.64536	0.03	3.24078	0.03	2.2026	0.0639604	0.803417	0.462515	1.33256	0.414198	4.76223	2.25164	630	432	144														CAMPEP_0199676178-CAMNT_0045541051	100			Pelagomonas calceolata , Strain CCMP1756
contig_10104_304_963_-	0.03	0.03	0.03	0.03	0.03	0.299507	0.03	0.03	0.03	0.03	0.03	0.03	0.03	0.03	0.49451	0.259359	0.03	0.03	0.03	0.243589	0.03	0.650151	0.834777	0.086046	0.058023	-4.10723	0.348651	-1.52015	1436	660	220								0003774||0016459		KOG0161	Myosin class II heavy chain	Cytoskeleton	CELLULAR PROCESSES AND SIGNALING	100123633-nvi5862	64	Mhc1, NV11782; myosin heavy chain 1		Nasonia vitripennis
contig_1014895_1_498_+	3.59076	0.03	0.03	0.03	0.03	0.03	0.03	0.03	0.03	0.03	0.03	0.03	0.03	0.03	0.03	0.03	0.03	0.03	0.03	0.03	0.658222	0.574365	0.834777	0.229475	0.443848	-1.17186	2.86838	1.52023	591	498	166														CAMPEP_0170479296-CAMNT_0010751665	57			Strombidium inclinatum
contig_1017724_1_159_+	0.03	0.03	0.03	0.03	0.03	0.03	0.03	0.03	0.03	0.03	0.03	0.03	0.03	0.03	0.03	0.03	6.34634	4.0488	10.2076	0.03	0.03	0.70479	0.834777	1.0068	0.518398	-0.947868	0.0297975	-5.06866	798	159	53														CAMPEP_0197551872-CAMNT_0043112421	78	PF00504.16: Chlorophyll A-B binding protein		Bolidomonas, Strain RCC2347
contig_103400_1_1327_-	0.03	0.03	0.03	0.03	0.03	0.03	0.197063	0.03	0.03	0.03	0.03	0.03	0.03	0.03	0.03	0.03	0.124602	0.126306	0.03	0.03	0.03	0.696226	0.834777	0.0470462	0.0385231	-4.69813	0.63767	-0.649117	1328	1327	442.333														CAMPEP_0190304324-CAMNT_0034037373	36			Oxyrrhis marina
contig_103685_145_645_-	0.03	0.03	0.03	0.03	0.03	0.03	0.4725	0.03	0.03	0.03	0.03	0.03	0.516515	0.03	0.641929	0.33215	0.531146	0.285086	0.49143	0.59275	0.03	0.454738	0.834777	0.202548	0.116274	-3.1044	0.148113	-2.75523	813	501	167	nve:NEMVE_v1g106028	hypothetical protein						5509	A7S690	KOG0028	Ca2+-binding protein (centrin/caltractin), EF-Hand superfamily protein	Cytoskeleton	CELLULAR PROCESSES AND SIGNALING	CAMPEP_0200862146-CAMNT_0047039689	76	PF00036.27: EF hand PF13499.1: EF-hand domain pair		Karlodinium micrum, Strain CCMP2283
contig_1053740_211_478_+	0.03	0.03	0.03	0.892169	0.734803	0.693712	0.857211	0.03	1.47493	1.43767	1.4639	0.03	0.03	0.785697	0.601971	0.59484	0.498422	0.506858	0.892598	1.08201	0.03	0.239521	0.834777	0.606038	0.318019	-1.65282	0.0495018	-4.33637	478	268	89.3333	tgr:Tgr7_0797	pilin; K02650 type IV pilus assembly protein PilA	tgr02020	K02650	type IV pilus assembly protein PilA	Two-component system		0007155||0009289	B8GN27					MDMS009_2836-NZ_GG657906	49	Pilin (bacterial filament) subfamily	CAM_CRCL_2907	Methylophaga thiooxydans DMS010
contig_105627_1_696_-	0.03	0.03	0.03	0.361984	0.03	0.285567	0.03	0.03	0.03	0.03	0.03	0.352663	0.730414	0.03	0.03	0.03	0.21037	0.213618	0.03	0.03	0.03	0.593249	0.834777	0.124029	0.0770147	-3.69872	0.241878	-2.04765	696	696	232														CAMPEP_0200768858-CAMNT_0046921869	71	TIGR02169: SMC_prok_A: chromosome segregation protein SMC		Karlodinium micrum, Strain CCMP2283
contig_106319_81_938_-	0.03	0.03	0.03	0.03	0.03	0.03	0.03	0.03	0.03	0.03	0.03	0.03	0.03	0.03	0.03	0.03	0.322627	0.03	0.03	0.03	0.03	0.823063	0.834777	0.0439346	0.0369673	-4.75761	0.682832	-0.550396	938	858	286	pmm:PMM1665	sqdB; sulfolipid (UDP-sulfoquinovose) biosynthesis protein; K06118 UDP-sulfoquinovose synthase [EC:3.13.1.1]	pmm00561||pmm00520	K06118	UDP-sulfoquinovose synthase [EC:3.13.1.1]	Amino sugar and nucleotide sugar metabolism || Glycerolipid metabolism	3.13.1.1	0003824||0046507||0050662	Q7UZJ8					PMM1665-NC_005072	92	sqdB; sulfolipid (UDP-sulfoquinovose) biosynthesis protein; K06118 UDP-sulfoquinovose synthase [EC:3.13.1.1]	CAM_CRCL_33537817	Prochlorococcus marinus subsp. pastoris str. CCMP1986
contig_106669_24_446_-	0.03	0.03	0.03	0.03	0.03	0.03	0.03	0.03	0.03	0.03	0.03	0.03	0.03	0.03	0.03	0.03	0.03	0.03	2.21606	0.03	0.03	0.823063	0.834777	0.134098	0.0820491	-3.60737	0.223716	-2.16026	644	423	141	sdn:Sden_0377	OsmC-like protein						0004601||0006979	Q12SA4					gi149927591-NZ_ABCT01000012	97	peroxiredoxin, Ohr subfamily	CAM_CRCL_10264	Limnobacter MED105
contig_1076782_1_348_-	0.03	0.03	0.03	0.03	0.03	0.03	0.03	0.03	0.03	1.11407	0.03	0.675326	0.03	0.611974	0.03	0.03	0.03	0.397236	0.03	0.03	0.03	0.656151	0.834777	0.157553	0.0937764	-3.41463	0.190412	-2.3928	455	348	116										KOG0841	Multifunctional chaperone (14-3-3 family)	Posttranslational modification, protein turnover, chaperones	CELLULAR PROCESSES AND SIGNALING	CAMPEP_0176376426-CAMNT_0017737875	76	PF00244.15: 14-3-3 protein		Strombidinopsis acuminata
contig_1107016_1_592_+	0.03	0.03	0.03	2.37184	3.22066	1.83279	1.15344	0.03	0.03	0.03	0.03	4.20282	3.73557	1.74053	1.32466	1.05282	1.51439	0.677625	0.811001	1.69686	0.55847	0.581315	0.834777	1.24302	0.900747	-0.150807	0.449284	-1.1543	592	592	197.333								3924		KOG1375	Beta tubulin	Cytoskeleton	CELLULAR PROCESSES AND SIGNALING	CAMPEP_0202684706-CAMNT_0049338901	61	PF00091.20: Tubulin/FtsZ family, GTPase domain		Elphidium margaritaceum
contig_1118355_59_415_+	0.03	0.03	0.03	0.03	0.03	0.03	0.03	0.03	0.03	0.03	0.03	0.03	0.03	0.03	0.03	0.03	0.381645	0.03	0.03	0.03	0.03	0.823063	0.834777	0.046745	0.0383725	-4.70378	0.64178	-0.639849	439	357	119														CAMPEP_0118846932-CAMNT_0006779121	90			Phaeocystis sp. CCMP2710
contig_112078_1_978_-	0.03	0.03	0.03	0.03	0.03	0.03	0.03	0.03	0.03	0.03	0.03	0.03	0.03	0.03	0.03	0.03	0.158361	0.03	0.03	0.03	0.03	0.823063	0.834777	0.0361124	0.0330562	-4.91893	0.830739	-0.267533	978	978	326	tbr:Tb10.389.1180	P-type H+-ATPase (EC:3.6.3.6); K01535 H+-transporting ATPase [EC:3.6.3.6]	tbr00190	K01535	H+-transporting ATPase [EC:3.6.3.6]	Oxidative phosphorylation	3.6.3.6	0000166||0008553||0046872	Q388Z3					CAMPEP_0171056772-CAMNT_0011511761	87	TIGR01647: ATPase-IIIA_H: plasma-membrane proton-efflux P-type ATPase PF00122.15: E1-E2 ATPase PF00702.21: haloacid dehalogenase-like hydrolase		Gambierdiscus australes
contig_1120806_1_1010_+	0.03	0.03	0.03	0.03	0.03	0.03	0.03	0.03	0.03	0.03	0.03	0.03	0.03	0.230522	0.18177	0.03	0.03	0.03	0.03	0.03	0.03	0.748163	0.834777	0.0467758	0.0383879	-4.7032	0.641357	-0.6408	1921	1010	336.667														CAMPEP_0200827584-CAMNT_0046994537	54			Karlodinium micrum, Strain CCMP2283
contig_1120921_2282_2998_+	0.03	0.03	0.03	0.03	0.03	0.03	0.03	0.03	0.03	0.03	0.03	0.03	0.03	0.03	0.243791	0.03	0.205087	0.03	0.03	0.03	0.03	0.746937	0.834777	0.048518	0.039259	-4.67083	0.618327	-0.693557	3443	717	239														CAMPEP_0200826160-CAMNT_0046992559	77			Karlodinium micrum, Strain CCMP2283
contig_1120922_723_1806_+	0.03	0.03	0.03	0.03	0.03	0.03	0.03	0.03	0.03	0.03	0.03	0.03	0.03	0.03	0.03	0.03	0.493237	0.147895	0.243262	0.03	0.03	0.72559	0.834777	0.0678283	0.0489141	-4.3536	0.442293	-1.17692	1807	1084	361.333	vcn:VOLCADRAFT_105291	hypothetical protein						5524		KOG0651	26S proteasome regulatory complex, ATPase RPT4	Posttranslational modification, protein turnover, chaperones	CELLULAR PROCESSES AND SIGNALING	CAMPEP_0119127716-CAMNT_0007117995	71	PF00004.24: ATPase family associated with various cellular activities (AAA)		Prasinophyceae sp. RCC2339
contig_1121498_1_586_-	0.03	0.03	0.03	0.03	0.03	0.03	0.03	0.03	0.03	0.03	0.03	0.03	0.03	0.03	0.03	0.03	0.244227	0.248085	0.03	0.03	0.03	0.745614	0.834777	0.0505863	0.0402932	-4.63332	0.593046	-0.753785	1402	586	195.333														CAMPEP_0186768498-CAMNT_0029649711	42			Azadinium spinosum 3D9
contig_1121996_47_1971_-	0.03	0.03	0.03	0.03	0.03	0.03	0.03	0.03	0.03	0.03	0.03	0.03	0.03	0.03	0.03	0.03	0.0952141	0.03	0.03	0.03	0.03	0.823063	0.834777	0.0331054	0.0315527	-4.98609	0.906196	-0.142106	4209	1925	641.667														CAMPEP_0191908676-CAMNT_0035991125	42			Scrippsiella hangoei SHTV5
contig_1122643_25_892_-	0.03	0.03	0.03	0.828599	0.247612	0.234925	0.03	0.03	0.03	0.03	0.03	0.03	0.03	0.03	0.03	0.03	0.03	0.03	0.03	0.03	0.03	0.742171	0.834777	0.0881493	0.0590747	-4.08132	0.340332	-1.55499	892	868	289.333														CAMPEP_0200850394-CAMNT_0047024999	42	PF00754.20: F5/8 type C domain PF00652.17: Ricin-type beta-trefoil lectin domain		Karlodinium micrum, Strain CCMP2283
contig_1122707_1_876_-	0.03	0.03	0.03	0.03	0.03	0.03	0.03	0.03	0.03	0.03	0.03	0.03	0.03	0.03	0.03	0.03	0.173307	0.03	0.03	0.03	0.03	0.823063	0.834777	0.0368242	0.0334121	-4.90349	0.814683	-0.29569	876	876	292	pti:PHATR_18665	SHMT, GHMT; serine hydroxymethyltransferase; K00600 glycine hydroxymethyltransferase [EC:2.1.2.1]	pti01100||pti00670||pti00260||pti00460||pti01110	K00600	glycine hydroxymethyltransferase [EC:2.1.2.1]	Glycine, serine and threonine metabolism || Cyanoamino acid metabolism || Glyoxylate and dicarboxylate metabolism || One carbon pool by folate || Methane metabolism || Carbon metabolism || Biosynthesis of amino acids	2.1.2.1	0004372||0006544||0006563	B5Y594					CAMPEP_0192116570-CAMNT_0036221297	93	PF00464.14: Serine hydroxymethyltransferase		Scrippsiella trochoidea CCMP3099
contig_1124435_424_699_+	0.03	0.03	0.03	0.867178	0.03	0.03	0.03	0.03	0.03	0.03	0.03	1.65734	0.913131	0.03	0.585392	0.578468	1.39453	0.956072	0.03	0.540757	0.03	0.488219	0.834777	0.375375	0.202688	-2.30267	0.0799201	-3.6453	699	276	92	nve:NEMVE_v1g207743	hypothetical protein						0016301||0016772	A7S6V8	KOG3581	Creatine kinases	Energy production and conversion	METABOLISM	CAMPEP_0190331464-CAMNT_0034069421	80	PF00217.14: ATP:guanido phosphotransferase, C-terminal catalytic domain PF02807.10: ATP:guanido phosphotransferase, N-terminal domain		Oxyrrhis marina
contig_112511_1_1017_+	0.03	0.03	0.03	0.03	0.03	0.204901	0.03	0.03	0.03	0.03	0.03	0.03	0.03	0.229141	0.03	0.178847	0.03	0.03	0.03	0.03	0.03	0.685491	0.834777	0.0548995	0.0424498	-4.5581	0.546453	-0.871831	1641	1017	339	amu:Amuc_1098	type II and III secretion system protein; K02453 general secretion pathway protein D	amu03070	K02453	general secretion pathway protein D	Bacterial secretion system			B2UR39					Amuc_1098-NC_010655	45	type II and III secretion system protein; K02453 general secretion pathway protein D	CAM_CRCL_4846528	Akkermansia muciniphila ATCC BAA-835
contig_1125524_403_876_-	0.03	0.03	0.03	0.03	0.03	0.03	0.03	0.03	0.03	0.03	0.03	0.03	0.03	0.03	0.03	0.03	0.03	0.299616	0.03	0.03	0.03	0.823063	0.834777	0.0428389	0.0364194	-4.77915	0.700299	-0.513957	1244	474	158	vcn:VOLCADRAFT_73076	ahd1; bifunctional aspartate kinase/homoserine dehydrogenase; K12524 bifunctional aspartokinase / homoserine dehydrogenase 1 [EC:2.7.2.4 1.1.1.3]						0006520||0055114						CAMPEP_0197992444-CAMNT_0043634693	64	TIGR01296: asd_B: aspartate-semialdehyde dehydrogenase PF00742.14: Homoserine dehydrogenase PF02774.13: Semialdehyde dehydrogenase, dimerisation domain		Polarella glacialis, Strain CCMP2088
contig_1125809_1_1061_+	0.03	0.03	0.03	0.03	0.03	0.03	0.03	0.03	0.03	0.03	0.03	0.03	0.03	0.03	0.03	0.03	0.03	0.03	0.03	1.09291	0.03	0.823063	0.834777	0.0806149	0.0553075	-4.17638	0.37214	-1.42608	1381	1061	353.667	dhd:Dhaf_4481	Ig domain protein							B8FWI4					Dhaf_4481-NC_011830	40	Ig domain-containing protein	CAM_CRCL_14338045	Desulfitobacterium hafniense DCB-2
contig_1126347_209_1117_+	0.03	0.03	0.03	0.03	0.03	0.03	0.03	0.03	0.03	0.03	0.03	0.03	0.03	0.03	0.03	0.03	0.168105	0.03	0.284319	0.03	0.03	0.756731	0.834777	0.0486869	0.0393434	-4.66773	0.616183	-0.69857	1224	909	303	vcn:VOLCADRAFT_73775	hypothetical protein; K10949 ER lumen protein retaining receptor						0006621||0016021||0046923		KOG3106	ER lumen protein retaining receptor	Intracellular trafficking, secretion, and vesicular transport	CELLULAR PROCESSES AND SIGNALING	CAMPEP_0200849336-CAMNT_0047023605	88	PF00810.13: ER lumen protein retaining receptor		Karlodinium micrum, Strain CCMP2283
contig_112776_13_510_-	0.03	0.03	0.03	0.03	0.03	0.03	0.03	0.03	0.03	0.03	0.03	0.480951	0.03	0.03	0.03	0.03	0.03	0.03	0.03	0.03	0.03	0.823063	0.834777	0.0514739	0.0407369	-4.61752	0.58282	-0.778877	697	498	166	syx:SynWH7803_0492	mpeA; C-phycoerythrin class II alpha chain; K05376 phycoerythrin alpha chain	syx00196||syx01100	K05376	phycoerythrin alpha chain	Photosynthesis - antenna proteins		0015979||0030089	A5GJ03					gi493909354-NZ_AGIK01000006	90	bleomycin hydrolase		Synechococcus WH 8016
contig_1128468_1_669_+	0.03	0.03	0.03	0.375383	0.877028	0.03	0.361379	0.03	0.03	0.03	0.03	0.03	0.03	0.03	0.03	0.03	1.34354	0.794113	0.375555	0.240716	0.03	0.573394	0.834777	0.227987	0.128993	-2.95463	0.131587	-2.92591	669	669	223														CAMPEP_0190447636-CAMNT_0034206283	36			Oxyrrhis marina LB1974
contig_1129304_1_692_+	0.03	0.03	0.03	0.03	0.03	0.03	0.03	0.03	0.03	0.03	0.03	0.03	0.03	0.03	0.03	0.03	0.211412	0.214679	0.36407	0.233712	0.03	0.643119	0.834777	0.0730416	0.0515208	-4.2787	0.410725	-1.28376	772	692	230.667								0000345||0003677||0003899||0006350||0006351||0046983						HIMB5_00007480-NC_018643	92	DNA-directed RNA polymerase subunit alpha (EC:2.7.7.6)		alpha proteobacterium HIMB5
contig_1130590_1_416_+	0.03	0.03	0.03	0.03	0.03	0.03	0.03	0.03	0.03	0.03	0.03	0.03	0.03	0.03	0.03	0.03	0.331772	0.03	0.03	0.03	0.03	0.823063	0.834777	0.0443701	0.037185	-4.74913	0.676131	-0.564625	465	416	138.667	tps:THAPSDRAFT_270092	hypothetical protein							B8CFP9					CAMPEP_0119228238-CAMNT_0007226565	99	PF00504.16: Chlorophyll A-B binding protein		Pelagomonas calceolata RCC969
contig_1131919_1_988_+	0.03	0.03	0.03	0.03	0.03	0.03	0.03	0.03	0.03	0.03	0.03	0.03	0.03	0.03	0.18515	0.183216	0.157062	0.03	0.03	0.03	0.03	0.684444	0.834777	0.0507347	0.0403673	-4.63067	0.591312	-0.758009	988	988	329.333														CAMPEP_0190309416-CAMNT_0034043379	36			Oxyrrhis marina
contig_1133530_1_1024_+	0.03	0.03	0.03	0.03	0.03	0.203706	0.03	0.03	0.03	0.03	0.03	0.03	0.03	0.03	0.03	0.177829	0.03	0.03	0.03	0.03	0.03	0.746477	0.834777	0.0453112	0.0376556	-4.73099	0.662088	-0.594905	1212	1024	341.333	amu:Amuc_1584	type II secretion system protein; K02653 type IV pilus assembly protein PilC		K02653	type IV pilus assembly protein PilC				B2ULL7					ORF04567-TG_gvs_533	69	type II secretion system protein	CAM_CRCL_3149	Verrucomicrobium spinosum DSM 4136
contig_1135441_1_305_+	0.03	0.03	0.03	1.54516	0.03	1.77959	1.48372	0.03	0.03	0.03	0.03	0.03	0.03	0.03	0.532584	1.02264	0.03	0.03	0.03	0.03	0.03	0.604916	0.834777	0.32589	0.177945	-2.4905	0.0920556	-3.44135	305	305	101.667	ote:Oter_2054	groEL; chaperonin GroEL; K04077 chaperonin GroEL	ote03018	K04077	chaperonin GroEL	RNA degradation || Longevity regulating pathway - worm || Type I diabetes mellitus || Legionellosis || Tuberculosis		0005524||0044267	B1ZMQ9					gi225155845-NZ_ABEA02000013	84	chaperonin GroEL	CAM_CRCL_36	Diplosphaera colitermitum TAV2
contig_1136211_1_980_-	0.03	0.03	0.03	0.973107	0.415484	0.75602	1.3873	0.03	0.425144	0.799912	1.20639	0.71747	1.27359	1.47662	0.968499	1.4202	0.542397	0.942843	0.03	0.749229	0.349239	0.478843	0.834777	0.693021	0.52113	-0.940284	0.503937	-0.988684	1056	980	326.667														OAN307_c24480-NC_020911	52	putative branched-chain amino acid ABC transporter periplasmic substrate binding protein	CAM_CRCL_2201	Octadecabacter antarcticus 307
contig_1138166_1_404_-	0.03	0.03	0.03	0.03	0.03	0.03	0.03	0.03	0.03	0.03	0.03	0.03	0.03	0.03	0.03	0.03	0.340736	0.346332	0.03	1.0768	0.03	0.734391	0.834777	0.109708	0.0698539	-3.83951	0.273453	-1.87063	462	404	134.667														NPH_3428-NZ_ADZZ01000463	37	conserved hypothetical protein	CAM_CRCL_15378	delta proteobacterium NaphS2
contig_1139230_1_584_-	0.03	0.03	0.03	0.03	0.03	0.03	0.03	0.03	0.03	0.03	0.03	0.03	0.03	0.03	0.03	0.03	0.244961	0.03	0.03	0.03	0.03	0.823063	0.834777	0.0402362	0.0351181	-4.83164	0.745597	-0.423533	584	584	194.667								0003924||0005525						Myrod_1262-Contig1	76	translation elongation factor Tu		Myroides odoratus DSM 2801
contig_1139923_1_770_-	0.03	0.03	0.03	0.03	0.03	0.03	0.03	0.03	0.03	0.03	0.03	0.03	0.03	0.03	0.03	0.03	0.03	0.03	0.330229	0.03	0.03	0.823063	0.834777	0.0442966	0.0371483	-4.75056	0.677253	-0.562234	1179	770	256.667	ava:Ava_D0009	hypothetical protein							Q3M2W2					Ava_D0009-NC_014000	46	hypothetical protein	CAM_CRCL_14716	Anabaena variabilis ATCC 29413
contig_1141884_1_545_-	0.03	0.03	0.03	0.03	0.03	0.03	0.03	0.03	0.03	0.03	0.03	0.03	0.03	0.03	0.03	0.03	0.03	0.03	0.03	0.288658	0.03	0.823063	0.834777	0.0423171	0.0361585	-4.78952	0.708934	-0.496277	1257	545	181.667	dth:DICTH_1595	oligopeptide ABC transporter, periplasmic oligopeptide-binding protein; K02035 peptide/nickel transport system substrate-binding protein	dth02010	K02035	peptide/nickel transport system substrate-binding protein				B5YAD9					DICTH_1595-NC_011297	31	oligopeptide ABC transporter periplasmic oligopeptide-binding protein; K02035 peptide/nickel transport system substrate-binding protein	CAM_CRCL_32628402	Dictyoglomus thermophilum H-6-12
contig_1142198_1_517_-	0.03	0.03	0.03	0.03	0.03	0.03	0.03	0.03	0.03	0.03	0.03	0.464378	0.03	0.03	0.03	0.03	0.03	0.03	0.03	0.03	0.03	0.823063	0.834777	0.0506847	0.0403423	-4.63156	0.591895	-0.756587	790	517	172.333														CAMPEP_0188252338-CAMNT_0031584191	53			Kryptoperidinium foliaceum CCAP1116_3
contig_1142589_1_920_+	0.03	0.03	0.03	0.281153	0.03	0.416684	0.03	0.03	0.03	0.03	0.03	1.25051	0.559878	0.250138	0.529853	0.359081	0.712267	0.446732	0.03	0.03	0.03	0.489209	0.834777	0.246014	0.138007	-2.85719	0.121944	-3.03571	1482	920	306.667	vcn:VOLCADRAFT_105176	hypothetical protein; K01535 H+-transporting ATPase [EC:3.6.3.6]												km10244-km	82	plasma membrane hydrogen ATPase	CAM_CRCL_1884	Karlodinium micrum, Strain CCMP2283
contig_114268_130_483_+	0.03	0.03	0.03	0.03	0.03	0.03	0.03	0.03	0.03	0.03	0.03	0.03	0.718543	0.03	0.03	0.03	0.03	0.391011	0.03	0.03	0.03	0.757872	0.834777	0.0799787	0.0549894	-4.1847	0.3751	-1.41465	483	354	118														CAMPEP_0190382778-CAMNT_0034134213	79			Oxyrrhis marina
contig_1142908_1_969_-	0.944994	0.03	1.76051	0.03	0.03	0.03	0.03	0.03	0.03	0.03	0.03	0.03	0.03	0.03	0.03	0.03	0.548213	0.425659	0.984288	0.03	0.03	0.63069	0.834777	0.244937	0.137468	-2.86283	0.122481	-3.02937	969	969	323	dsh:Dshi_1872	putative soluble aldose sugar dehydrogenase						0005975||0016901||0048038	A8LNA1					KB13_1240-GCA_000156155.1_scf_1106380163076	65	glucose/sorbosone dehydrogenase	CAM_CRCL_4013525	beta proteobacterium KB13
contig_1143143_1_800_-	0.03	0.03	0.03	0.03	0.03	0.03	0.03	0.03	0.03	0.03	0.03	0.03	0.03	0.03	0.03	0.03	0.971529	0.509242	0.03	0.03	0.03	0.758859	0.834777	0.0976558	0.0638279	-3.96967	0.307202	-1.70274	800	800	266.667														CAMPEP_0171090952-CAMNT_0011548999	53			Gambierdiscus australes
contig_1143444_324_902_+	0.03	0.03	0.03	0.03	0.03	0.03	0.03	0.03	0.03	0.03	0.03	0.03	0.03	0.03	0.03	0.03	0.246817	0.03	0.03	0.03	0.03	0.823063	0.834777	0.0403246	0.0351623	-4.82983	0.743962	-0.426699	925	579	193	cre:CHLREDRAFT_184810	LHCB4; chlorophyll a-b binding protein of photosystem II; K08915 light-harvesting complex II chlorophyll a/b binding protein 4	cre01100||cre00196	K08915	light-harvesting complex II chlorophyll a/b binding protein 4	Photosynthesis - antenna proteins			Q93WD2||A8J6D1					CAMPEP_0168624216-CAMNT_0008665729	72	PF00504.16: Chlorophyll A-B binding protein		Strombidium rassoulzadegani, Strain ras09
contig_1143762_1_730_-	0.03	0.03	0.03	0.03	0.03	0.03	0.03	0.03	0.03	0.03	0.03	0.03	0.03	0.03	0.03	0.03	0.201969	0.205066	0.03	0.03	0.03	0.745614	0.834777	0.0465254	0.0382627	-4.70792	0.644808	-0.633058	1537	730	243.333	ote:Oter_1589	major intrinsic protein; K06188 aquaporin Z		K06188	aquaporin Z			0005215||0006810||0016020	B1ZTT7					CAMPEP_0178401866-CAMNT_0020022717	70	TIGR00861: MIP: MIP family channel proteins PF00230.15: Major intrinsic protein		Amphidinium massartii
contig_1144014_31_426_-	0.03	0.03	0.03	0.03	0.03	0.03	0.03	0.03	0.03	0.03	0.03	0.597105	0.03	0.03	0.03	0.03	0.03	0.03	0.03	0.03	0.03	0.823063	0.834777	0.057005	0.0435025	-4.52276	0.52627	-0.926126	426	396	132														HIMB5_00006000-NC_018643	80	amino acid ABC transporter substrate-binding protein		alpha proteobacterium HIMB5
contig_1147125_1_483_-	0.03	0.03	0.03	0.03	0.421071	0.398271	0.03	0.03	0.03	0.03	0.03	0.03	0.534646	0.03	0.347367	0.03	0.03	0.03	0.03	0.321861	0.03	0.585583	0.834777	0.119201	0.0746004	-3.74467	0.251676	-1.99036	483	483	161	nve:NEMVE_v1g106028	hypothetical protein						5509	A7S690	KOG0028	Ca2+-binding protein (centrin/caltractin), EF-Hand superfamily protein	Cytoskeleton	CELLULAR PROCESSES AND SIGNALING	CAMPEP_0202940378-CAMNT_0049634831	44	PF00036.27: EF hand PF13499.1: EF-hand domain pair		Blepharisma japonicum, Strain Stock R1072
contig_1148564_1_419_+	0.03	0.03	0.03	0.03	0.03	0.03	0.03	0.03	0.03	0.03	0.03	0.03	0.03	0.03	0.03	0.03	0.03	0.335007	0.03	0.03	0.03	0.823063	0.834777	0.0445241	0.0372621	-4.74615	0.673792	-0.569625	419	419	139.667								0005524||0006457||0006950||0051082		KOG0020	Endoplasmic reticulum glucose-regulated protein (GRP94/endoplasmin), HSP90 family	Posttranslational modification, protein turnover, chaperones	CELLULAR PROCESSES AND SIGNALING	CAMPEP_0181192264-CAMNT_0023281647	97	PF00183.13: Hsp90 protein PF13589.1: Histidine kinase-, DNA gyrase B-, and HSP90-like ATPase		Haptolina ericina
contig_1149805_1_829_+	0.03	0.03	0.03	0.03	0.03	0.03	0.03	0.03	0.03	0.03	0.03	0.03	0.03	0.03	0.03	0.212602	0.03	0.03	0.03	0.03	0.03	0.823063	0.834777	0.0386953	0.0343477	-4.86364	0.775287	-0.367197	829	829	276.333								0005524||0044267						HIMB59_00000990-NC_018644	70	chaperonin GroL		alpha proteobacterium HIMB59
contig_1149931_1_1016_-	0.03	0.03	0.03	0.03	0.03	0.03	0.03	0.03	0.03	0.03	0.03	0.03	0.03	0.229337	0.180874	0.03	0.03	0.03	0.03	0.168749	0.03	0.687507	0.834777	0.0532838	0.0416419	-4.58582	0.563023	-0.828735	1017	1016	338.667	ddi:DDB_G0269138	fttB; hypothetical protein; K06630 tyrosine 3-monooxygenase/tryptophan 5-monooxygenase activation protein		K06630	14-3-3 protein epsilon	Cell cycle || Oocyte meiosis || PI3K-Akt signaling pathway || Hippo signaling pathway || Hippo signaling pathway - fly || Neurotrophin signaling pathway || Epstein-Barr virus infection || Viral carcinogenesis			P54632	KOG0841	Multifunctional chaperone (14-3-3 family)	Posttranslational modification, protein turnover, chaperones	CELLULAR PROCESSES AND SIGNALING	CAMPEP_0189191522-CAMNT_0032736521	75	PF00244.15: 14-3-3 protein		Karenia brevis SP3
contig_1150027_1_562_+	0.03	0.03	0.03	0.03	0.03	0.03	0.03	0.03	0.03	0.03	0.03	0.03	0.03	0.03	0.03	0.03	0.700127	0.03	0.03	0.03	0.03	0.823063	0.834777	0.0619108	0.0459554	-4.44362	0.484568	-1.04523	604	562	187.333	pmj:P9211_04691	photosystem I PsaF protein (subunit III); K02694 photosystem I subunit III	pmj01100||pmj00195	K02694	photosystem I subunit III	Photosynthesis		0009522||0009538||0015979	A9BE90					P9211_04691-NC_009976	56	psaF; photosystem I PsaF protein (subunit III); K02694 photosystem I subunit III	CAM_CRCL_4007697	Prochlorococcus marinus str. MIT 9211
contig_1150646_1_604_+	0.03	0.03	0.03	0.03	0.03	0.03	0.03	0.03	0.03	0.03	0.03	0.03	0.03	0.03	0.03	0.03	0.237843	0.03	0.03	0.03	0.03	0.823063	0.834777	0.0398973	0.0349486	-4.83862	0.751931	-0.411328	693	604	201.333														CAMPEP_0199822412-CAMNT_0045712637	58			Pseudo-nitzschia fraudulenta, Strain WWA7
contig_1151432_174_548_+	0.03	0.03	0.03	0.03	0.03	0.03	0.03	0.03	0.03	0.03	0.03	0.03	0.679984	0.03	0.03	0.03	0.364766	0.370795	0.03	0.03	0.03	0.700877	0.834777	0.0931212	0.0615606	-4.02185	0.322161	-1.63415	548	375	125														CAMPEP_0200695326-CAMNT_0046822921	85			Alexandrium monilatum, Strain CCMP3105
contig_1151685_16_813_-	0.03	0.03	0.03	0.03	0.03	0.252901	0.30781	0.03	0.03	0.975506	0.993123	0.311421	0.03	0.03	0.03	0.219696	0.187315	0.190148	0.03	0.03	0.03	0.584317	0.834777	0.182282	0.106141	-3.23595	0.16458	-2.60314	877	798	266	asa:ASA_1530	ABC-type amino acid transporter, periplasmic binding protein; K10039 putative glutamine transport system substrate-binding protein	asa02010	K10039	putative glutamine transport system substrate-binding protein	ABC transporters			A4SL46					PAI11_29130-GCA_000240225.2_contig233	40	extracellular solute-binding protein family 3		Patulibacter I11
contig_1152037_1_671_+	0.03	0.03	0.03	0.03	0.593002	0.560178	0.360391	0.03	0.03	0.03	0.03	0.03	0.03	0.331828	0.03	0.481199	0.03	0.220459	0.03	0.03	0.03	0.556449	0.834777	0.142717	0.0863585	-3.53352	0.210206	-2.25012	671	671	223.667	vex:VEA_003379	immunogenic protein; K07080		K07080	uncharacterized protein			0005215||0006810	A7K028					TH2_06658-GCA_000300275.1_contig2	69	hypothetical protein		Thalassospira profundimaris WP0211
contig_1153062_1_713_-	0.03	0.03	0.03	0.03	0.03	0.03	0.03	0.03	0.03	0.03	0.03	0.03	0.03	0.03	0.03	0.03	0.734276	0.03	1.00269	0.03	0.03	0.74901	0.834777	0.109856	0.0699278	-3.83799	0.273086	-1.87257	713	713	237.667														JCVI_PEP_metagenomic.orf.1126664263126.1-SAR324	53			SAR324 cluster bacterium JCVI-SC AAA005
contig_1153120_1_771_-	0.03	0.03	0.03	0.03	0.03	0.03	0.03	0.03	0.03	0.03	0.03	0.03	0.03	0.03	0.03	0.03	0.355648	0.03	0.03	0.03	0.03	0.823063	0.834777	0.045507	0.0377535	-4.72725	0.659239	-0.601127	771	771	257														CAMPEP_0190383554-CAMNT_0034135041	34			Oxyrrhis marina
contig_1154306_1_639_+	0.03	0.03	0.03	0.391598	0.03	0.03	0.03	0.03	0.03	0.03	0.03	2.49012	2.31868	0.346943	0.03	0.03	0.03	0.229997	0.03	0.471217	0.03	0.675421	0.834777	0.318979	0.174489	-2.51879	0.0940502	-3.41042	766	639	213										KOG1376	Alpha tubulin	Cytoskeleton	CELLULAR PROCESSES AND SIGNALING	CAMPEP_0202705036-CAMNT_0049363183	69	PF00091.20: Tubulin/FtsZ family, GTPase domain PF03953.12: Tubulin C-terminal domain		Elphidium margaritaceum
contig_115534_30_648_+	0.03	0.03	0.03	0.03	0.03	0.03	0.03	0.03	0.03	0.03	0.03	0.03	0.03	0.03	0.03	0.03	0.03	0.236459	0.03	0.03	0.03	0.823063	0.834777	0.0398314	0.0349157	-4.83998	0.753175	-0.408943	648	619	206.333														CAMPEP_0190447636-CAMNT_0034206283	40			Oxyrrhis marina LB1974
contig_1155642_1_767_-	0.03	0.03	0.03	0.03	0.03	0.03	0.03	0.03	0.03	0.03	0.03	0.03	0.03	0.03	0.03	0.03	0.03	0.03	0.331403	0.03	0.03	0.823063	0.834777	0.0443525	0.0371763	-4.74947	0.676399	-0.564054	1049	767	255.667	pmn:PMN2A_0745	hypothetical protein							Q46JU2					PMN2A_0745-NC_007335	39	hypothetical protein	CAM_CRCL_32704250	Prochlorococcus marinus str. NATL2A
contig_1158036_1236_2159_+	0.03	0.03	0.03	0.03	0.438847	0.03	0.03	0.03	0.03	0.03	0.03	0.03	0.03	0.03	0.03	0.03	0.03	0.03	0.03	0.182564	0.03	0.769903	0.834777	0.0567338	0.0433669	-4.52726	0.528785	-0.919247	2382	924	308														PSMK_12200-NC_017080	80	putative urea ABC transporter substrate binding protein		Phycisphaera mikurensis NBRC 102666
contig_1159485_1_770_-	1.18147	0.03	0.03	0.03	0.03	0.03	0.03	0.03	0.03	0.03	0.03	0.03	0.03	0.03	0.03	0.03	0.193035	0.195971	0.03	0.03	0.03	0.774847	0.834777	0.100499	0.0652494	-3.93789	0.298511	-1.74414	1583	770	256.667	rli:RLO149_c041170	ABC transporter periplasmic protein; K02058 simple sugar transport system substrate-binding protein		K02058	simple sugar transport system substrate-binding protein									RLO149_c041170-NC_015730	48	ABC transporter periplasmic protein; K02058 simple sugar transport system substrate-binding protein	CAM_CRCL_8717	Roseobacter litoralis Och 149
contig_1159870_1_733_-	0.03	0.03	0.03	0.03	0.03	0.03	0.03	0.03	0.03	0.03	0.03	0.03	0.03	0.03	0.03	0.03	0.03	0.03	8.22998	0.03	0.03	0.823063	0.834777	0.420475	0.225238	-2.15048	0.0713479	-3.80899	1610	733	244.333	pmn:PMN2A_0777	porin-like protein							Q46JR0					PMN2A_0777-NC_007335	67	porin-like protein	CAM_CRCL_33262832	Prochlorococcus marinus str. NATL2A
contig_1160193_1_441_+	0.03	0.03	0.03	0.03	0.03	0.03	0.03	0.03	0.03	0.03	0.03	0.03	0.03	0.03	0.03	0.03	0.03	0.03	0.03	0.349657	0.03	0.823063	0.834777	0.0452218	0.0376109	-4.73271	0.663397	-0.592055	1404	441	147														CAMPEP_0199544468-CAMNT_0045383285	43			Ceratium fusus, Strain PA161109
contig_1161466_780_1046_+	0.03	0.03	0.03	0.03	0.03	0.03	0.03	0.03	0.03	0.03	0.03	0.03	0.03	0.03	0.03	0.596956	0.500177	0.508644	0.03	0.03	0.03	0.684395	0.834777	0.10218	0.0660899	-3.91943	0.2936	-1.76808	1242	267	89								5198						CAMPEP_0185728554-CAMNT_0028397275	44	TIGR02241: TIGR02241: conserved hypothetical phage tail region protein PF06841.7: T4-like virus tail tube protein gp19		Helicotheca tamensis, Strain CCMP826
contig_116255_270_828_+	0.03	0.03	0.03	0.03	0.03	0.348202	0.426588	0.03	0.03	0.03	0.03	0.03	0.03	0.03	0.03	0.03	0.03	0.03	0.03	0.03	0.03	0.747219	0.834777	0.0640376	0.0470188	-4.41062	0.468475	-1.09396	828	559	186.333	pub:SAR11_0769	binding protein component of ABC sugar transporter; K02027 multiple sugar transport system substrate-binding protein		K02027	multiple sugar transport system substrate-binding protein			0005215||0006810	Q4FMK2					gi91762107-NZ_AAPV01000001	78	probable binding protein component of ABC sugar transporter	CAM_CRCL_32434635	Pelagibacter ubique HTCC1002
contig_11634_44_325_+	0.03	0.03	0.03	0.03	0.699813	0.03	0.03	0.03	0.03	0.03	0.03	0.03	0.03	0.03	0.573575	0.566799	0.03	0.03	0.03	0.03	0.03	0.684996	0.834777	0.113342	0.0716711	-3.80246	0.264685	-1.91765	1716	282	94								3677						or0839-POR4C_contig00106standard	60	Bacterial nucleoid DNA-binding protein		Poribacteria WGA-4C
contig_1163586_1_1104_+	0.03	0.03	0.03	0.239295	0.03	0.03	0.03	0.03	0.03	0.03	0.03	0.03	0.03	0.03	0.03	0.03	0.03	0.03	0.03	0.03	0.03	0.823063	0.834777	0.0399664	0.0349832	-4.83719	0.75063	-0.413825	1179	1104	368								0016491||0055114						CAMPEP_0116876142-CAMNT_0004522603	81	TIGR01759: MalateDH-SF1: malate dehydrogenase PF02866.13: lactate/malate dehydrogenase, alpha/beta C-terminal domain PF00056.18: lactate/malate dehydrogenase, NAD binding domain		Strombidinopsis sp.
contig_1164203_1_952_-	0.03	0.03	0.03	0.03	0.03	0.03	0.03	0.03	0.03	0.03	0.03	0.03	0.03	0.03	0.03	0.03	0.03	0.164242	0.03	0.03	0.03	0.823063	0.834777	0.0363925	0.0331962	-4.91284	0.824347	-0.278677	952	952	317.333	isc:IscW_ISCW002538	Na+/K+ ATPase, alpha subunit, putative (EC:3.6.3.9); K01539 sodium/potassium-transporting ATPase subunit alpha [EC:3.6.3.9]		K01539	sodium/potassium-transporting ATPase subunit alpha [EC:3.6.3.9]	cGMP-PKG signaling pathway || cAMP signaling pathway || Cardiac muscle contraction || Adrenergic signaling in cardiomyocytes || Insulin secretion || Thyroid hormone synthesis || Thyroid hormone signaling pathway || Aldosterone-regulated sodium reabsorption || Endocrine and other factor-regulated calcium reabsorption || Proximal tubule bicarbonate reclamation || Salivary secretion || Gastric acid …	3.6.3.9	0000166||0005391||0046872	B7P9E4	KOG0203	Na+/K+ ATPase, alpha subunit	Inorganic ion transport and metabolism	METABOLISM	CAMPEP_0170492786-CAMNT_0010768595	77	TIGR01106: ATPase-IIC_X-K: Na,H/K antiporter P-type ATPase, alpha subunit PF00122.15: E1-E2 ATPase PF00689.16: Cation transporting ATPase, C-terminus		Strombidium inclinatum
contig_1165214_59_749_-	0.03	0.03	0.03	0.03	0.303354	0.287416	0.03	0.03	0.590407	0.575958	0.58613	0.03	0.03	0.616185	0.473671	0.468139	0.575024	0.399893	0.699106	0.234007	0.03	0.297714	0.834777	0.28949	0.159745	-2.64616	0.103631	-3.27048	749	691	230.333														CAMPEP_0200827266-CAMNT_0046994091	74			Karlodinium micrum, Strain CCMP2283
contig_1166183_1_729_-	0.03	0.03	0.03	0.663913	0.548209	0.273998	0.942315	0.03	1.62359	1.5825	1.61142	0.646114	1.36742	0.585629	0.871087	0.445301	0.202205	0.380612	0.664228	0.223373	0.888311	0.644935	0.834777	0.649534	0.768923	-0.37909	1.36761	0.451659	1061	729	243								0005524||0006457||0006950||0051082		KOG0020	Endoplasmic reticulum glucose-regulated protein (GRP94/endoplasmin), HSP90 family	Posttranslational modification, protein turnover, chaperones	CELLULAR PROCESSES AND SIGNALING	CAMPEP_0200813678-CAMNT_0046975335	75	PF00183.13: Hsp90 protein PF13589.1: Histidine kinase-, DNA gyrase B-, and HSP90-like ATPase		Karlodinium micrum, Strain CCMP2283
contig_1167945_1_891_-	0.03	0.03	0.03	0.03	0.03	0.229635	0.278813	0.03	0.03	0.03	0.03	0.282047	0.03	0.03	0.03	0.03	0.03	0.173432	0.03	0.188214	0.03	0.588135	0.834777	0.077721	0.0538605	-4.21463	0.385996	-1.37334	1216	891	297	nde:NIDE3237	nxrA1; putative nitrate oxidoreductase subunit alpha (EC:1.7.99.4); K00370 nitrate reductase 1, alpha subunit [EC:1.7.99.4]	nde02020||nde00910||nde01120	K00370	nitrate reductase alpha subunit [EC:1.7.99.4]	Nitrogen metabolism || Two-component system	1.7.99.4	8940						KSU1_D0577-GCA_000296795.1_BAFH01000004	72	nitrate reductase alpha subunit		planctomycete KSU-1
contig_1168625_388_1029_+	0.03	0.03	0.03	0.03	0.03	0.03	0.03	0.03	0.03	0.03	0.03	0.03	0.03	0.03	0.03	0.03	0.225541	0.03	0.03	0.249578	0.03	0.746057	0.834777	0.0497675	0.0398838	-4.64805	0.602803	-0.730243	1385	642	214	sil:SPO0738	TRAP dicarboxylate transporter, DctP subunit						0006810||0030288	Q5LVG4					gi89095419-NZ_AAOW01000043	53	trap dicarboxylate transporter- dctp subunit	CAM_CRCL_33079048	Neptuniibacter caesariensis
contig_116977_1_662_-	0.03	0.03	0.03	0.03	0.03	0.03	0.03	0.03	0.03	0.03	0.03	0.03	0.03	0.947796	0.724659	0.03	0.5989	0.223048	1.42684	0.455888	0.03	0.595693	0.834777	0.229863	0.129932	-2.94418	0.130512	-2.93774	662	662	220.667	tet:TTHERM_00836580 || tet:TTHERM_00348510	Tubulin/FtsZ family, GTPase domain containing protein; K07375 tubulin beta || Tubulin beta chain, putative; K07375 tubulin beta						3924		KOG1375	Beta tubulin	Cytoskeleton	CELLULAR PROCESSES AND SIGNALING	CAMPEP_0194476768-CAMNT_0039315665	94	TIGR00065: ftsZ: cell division protein FtsZ PF03953.12: Tubulin C-terminal domain PF00091.20: Tubulin/FtsZ family, GTPase domain		Noctiluca scintillans
contig_1178897_1_701_-	0.03	0.03	0.03	0.03	0.03	0.03	0.03	0.03	0.03	0.03	0.03	0.991085	1.42084	0.03	0.03	0.03	0.03	0.576924	0.03	0.03	0.03	0.703225	0.834777	0.16804	0.0990201	-3.33613	0.178529	-2.48577	942	701	233.667														CAMPEP_0199177914-CAMNT_0044905259	44	TIGR02168: SMC_prok_B: chromosome segregation protein SMC		Scrippsiella hangoei-like, Strain SHHI-4
contig_1178959_48_881_-	0.03	0.03	0.03	0.03	0.03	0.03	0.03	0.03	0.03	0.03	0.03	0.03	0.03	0.03	0.03	0.03	0.180524	0.03	0.03	0.03	0.03	0.823063	0.834777	0.0371678	0.0335839	-4.89609	0.80715	-0.309092	1961	834	278														CAMPEP_0200766778-CAMNT_0046919389	58			Karlodinium micrum, Strain CCMP2283
contig_1179736_1_915_-	0.03	0.03	0.03	0.03	0.03	0.03	0.03	0.03	0.03	0.03	0.03	0.03	0.03	0.03	0.03	0.03	0.167199	0.03	0.03	0.03	0.03	0.823063	0.834777	0.0365333	0.0332666	-4.90978	0.821169	-0.284249	1840	915	305														CAMPEP_0197622454-CAMNT_0043192187	40			Pelagodinium beii
contig_118086_1_1405_-	0.03	0.03	0.03	0.03	0.03	0.03	0.03	0.03	0.03	0.03	0.03	0.03	0.03	0.03	0.03	0.03	0.03	0.393838	0.688153	0.03	0.03	0.756163	0.834777	0.0786662	0.0543331	-4.20202	0.381358	-1.39078	2235	1405	468.333	sse:Ssed_3019	hypothetical protein							A8FXQ0					CAMPEP_0191451272-CAMNT_0035433315	41			Pseudopedinella elastica CCMP716
contig_1181716_146_973_-	0.03	0.03	0.03	0.03	0.03	0.03	0.03	0.03	0.03	0.03	0.03	0.03	0.03	0.03	0.03	0.03	0.03	0.184345	0.03	0.03	0.03	0.823063	0.834777	0.0373498	0.0336749	-4.89218	0.803218	-0.316137	2470	828	276	psm:PSM_A1589	etfA; electron transfer flavoprotein subunit alpha; K03522 electron transfer flavoprotein alpha subunit		K03522	electron transfer flavoprotein alpha subunit				E6RK01					PSM_A1589-NC_014803	76	etfA; electron transfer flavoprotein subunit alpha; K03522 electron transfer flavoprotein alpha subunit	CAM_CRCL_4010769	Pseudoalteromonas SM9913
contig_1181737_1_1045_+	0.03	0.03	0.03	0.03	0.03	0.03	0.03	0.03	0.771132	0.391011	0.397738	0.03	0.03	0.03	0.03	0.174859	0.03	0.152295	0.251221	0.299797	0.03	0.570927	0.834777	0.136098	0.0830489	-3.5899	0.22043	-2.18161	1511	1045	348.333	pde:Pden_5072	extracellular solute-binding protein; K02035 peptide/nickel transport system substrate-binding protein	pde02010	K02035	peptide/nickel transport system substrate-binding protein				A1BC88					gi159179808-ABHC01000009	48	ABC transporter, substrate-binding protein, family 5	CAM_CRCL_22694	alpha proteobacterium BAL199
contig_1181766_34_1184_+	0.03	0.03	0.03	0.03	0.03	0.03	0.03	0.03	0.03	0.03	0.03	0.03	0.03	0.205957	0.03	0.03	0.139068	0.03	0.03	0.03	0.03	0.752764	0.834777	0.0435726	0.0367863	-4.76469	0.688506	-0.53846	1185	1151	383.667														CAMPEP_0189646946-CAMNT_0033313363	48	TIGR02168: SMC_prok_B: chromosome segregation protein SMC		Kryptoperidinium foliaceum CCMP1326
contig_1181775_1_1040_+	0.03	0.03	0.03	0.03	0.03	0.03	0.03	0.03	0.03	0.03	0.03	0.03	0.264369	0.03	0.03	0.03	0.03	0.03	0.03	0.03	0.03	0.823063	0.834777	0.0411604	0.0355802	-4.81278	0.728855	-0.456296	1507	1040	346.667								3924		KOG1375	Beta tubulin	Cytoskeleton	CELLULAR PROCESSES AND SIGNALING	CAMPEP_0202703490-CAMNT_0049361361	85	PF00091.20: Tubulin/FtsZ family, GTPase domain PF03953.12: Tubulin C-terminal domain		Elphidium margaritaceum
contig_1181867_26_940_-	0.03	0.03	0.03	1.54516	1.26861	0.03	0.03	0.03	0.03	0.03	0.03	0.03	0.03	0.03	0.03	0.03	0.03	0.03	0.03	0.03	0.03	0.746961	0.834777	0.161131	0.0955657	-3.38736	0.186183	-2.4252	1286	915	305								0000286||0005737||0006522						amad1_11090-NC_019393	91	alanine dehydrogenase		Alteromonas macleodii AltDE1
contig_1181904_332_874_-	0.03	0.03	0.03	0.03	0.03	0.685156	0.438274	0.03	0.03	0.03	0.03	0.03	0.478884	0.03	0.312299	0.03	0.03	0.03	0.03	0.289611	0.03	0.603166	0.834777	0.12782	0.0789101	-3.66365	0.234705	-2.09108	1700	543	181	hor:Hore_16570	flagellar basal-body rod protein FlgG; K02392 flagellar basal-body rod protein FlgG	hor02040	K02392	flagellar basal-body rod protein FlgG	Flagellar assembly			B8CYN8					J0000001B09DRAFT_00445-J0000001B09DRAFT_contig_73_0.74	52	flagellar basal-body rod protein FlgG, Gram-negative bacteria/flagellar basal-body rod protein FlgF		Fervidibacteria bacterium JGI 0000001-B9
contig_1181994_1_849_+	0.03	0.03	0.03	0.03	0.03	0.449022	0.291122	0.03	0.486115	0.03	0.03	0.03	0.03	0.03	0.03	0.208301	0.03	0.331055	0.574585	0.694164	0.03	0.523217	0.834777	0.164494	0.0972468	-3.36221	0.182378	-2.455	2609	849	283								0016491||0055114						or3066-POR4E_contig00324standard	63	Aerobic-type carbon monoxide dehydrogenase, middle subunit CoxM/CutM homologs		Poribacteria WGA-4E
contig_1182445_327_1025_+	0.03	0.03	0.03	0.03	0.03	0.03	0.03	0.03	0.03	0.03	0.03	0.03	0.03	0.03	0.03	0.03	0.03	0.03	0.03	0.635016	0.03	0.823063	0.834777	0.0588103	0.0444052	-4.49313	0.510115	-0.971107	2302	699	233	pol:Bpro_0678	catalase/peroxidase HPI (EC:1.11.1.6); K03782 catalase/peroxidase [EC:1.11.1.6 1.11.1.7]	pol01110||pol01100||pol00360||pol01120||pol00380||pol00680	K03782	catalase-peroxidase [EC:1.11.1.21]	Phenylalanine metabolism || Tryptophan metabolism || Phenylpropanoid biosynthesis	1.11.1.6||1.11.1.7	0004096||0004601||0006979||0020037||0055114	Q12FQ6					or2375-POR4E_contig00324standard	81	catalase/peroxidase HPI		Poribacteria WGA-4E
contig_1182881_962_2943_-	0.03	0.03	0.03	0.03	0.03	0.119745	0.03	0.03	0.03	0.03	0.03	0.143307	0.275958	0.03	0.03	0.182752	0.03	0.03	0.03	0.03	0.03	0.657054	0.834777	0.0586553	0.0443276	-4.49565	0.511463	-0.967299	3321	1982	660.667														gi113200613-NC_008296	42	structural protein	CAM_CRCL_96158	Synechococcus phage syn9
contig_1182906_993_1427_-	0.03	0.03	0.03	0.03	0.03	0.847815	0.03	0.03	0.03	0.03	0.03	0.03	0.03	0.961158	0.734773	0.03	0.318591	0.03	0.03	0.354066	0.03	0.615305	0.834777	0.176019	0.10301	-3.27915	0.170436	-2.5527	1646	435	145	rpb:RPB_2047	twin-arginine translocation pathway signal							Q2IYF6					RPB_2047-NC_007778	50	twin-arginine translocation pathway signal	CAM_CRCL_32552088	Rhodopseudomonas palustris HaA2
contig_1183032_1_1007_+	0.03	0.03	0.03	0.718365	1.15545	1.44311	1.57106	0.03	0.03	0.03	0.03	0.03	0.03	0.03	0.03	0.03	0.279329	0.664548	0.03	0.03	0.03	0.583344	0.834777	0.299136	0.164568	-2.60324	0.100289	-3.31777	1509	1007	335.667														gi498193603-NZ_AFHZ01000074	98	sugar ABC transporter substrate-binding protein		gamma proteobacterium SCGC AAA001-B15
contig_1183125_1_1001_+	0.03	0.03	0.03	0.03	0.03	0.03	0.03	0.03	0.03	0.03	0.03	0.03	0.03	0.03	0.03	0.03	0.03	0.03	0.03	0.170828	0.03	0.823063	0.834777	0.0367061	0.033353	-4.90604	0.817303	-0.291057	1655	1001	333.667	dds:Ddes_1628	elongation factor Tu; K02358 elongation factor Tu		K02358	elongation factor Tu			0003746||0003924||0005525||0006414	B8J1A0					or0190-POR4C_contig00106standard	75	translation elongation factor TU		Poribacteria WGA-4C
contig_1183334_4233_5444_+	0.03	0.03	0.03	0.03	0.03	0.176761	0.212915	0.03	0.03	0.03	0.03	0.215292	0.231109	0.03	0.282951	0.154899	0.03	0.135444	0.03	0.378933	0.03	0.479276	0.834777	0.103729	0.0668644	-3.90262	0.289216	-1.78978	5449	1212	404	ace:Acel_1461	cell wall binding repeat 2-containing protein							A0LUX3					Acel_1461-NC_008578	35	cell wall binding repeat 2-containing protein	CAM_CRCL_4009161	Acidothermus cellulolyticus 11B
contig_1183349_32_982_-	0.03	0.03	0.03	1.73077	1.22172	1.52632	1.89492	0.03	0.844388	1.61678	1.24226	1.21072	0.03	1.94666	0.997118	1.62177	1.48206	2.31451	1.24544	5.21813	2.33282	0.391747	0.834777	1.36173	1.84728	0.885399	1.71313	0.776632	1128	951	317	dsh:Dshi_1971	putative TRAP-transporter extracellular solute-binding protein						0006810||0030288	A8LP28					YUODRAFT_03782-YUODRAFT_scaffold_68.69	60	TRAP-type mannitol/chloroaromatic compound transport system, periplasmic component		Bradyrhizobium elkanii WSM1741
contig_1183379_1_912_+	0.03	0.03	0.03	0.283357	0.03	0.225038	0.03	0.03	0.03	0.03	0.03	0.03	0.297263	0.03	0.03	0.03	0.03	0.03	0.03	0.184571	0.03	0.636531	0.834777	0.0714395	0.0507197	-4.30131	0.419936	-1.25176	931	912	304	sil:SPO0660	peptide ABC transporter, periplasmic peptide-binding protein; K02035 peptide/nickel transport system substrate-binding protein	sil02010	K02035	peptide/nickel transport system substrate-binding protein				Q5LVP0					gi126727223-NZ_AAXZ01000008	59	ABC transporter, substrate-binding protein, family 5	CAM_CRCL_28084	Rhodobacteraceae bacterium HTCC2150
contig_1183631_1_661_+	0.03	0.03	0.03	1.42825	2.03032	2.4519	2.04234	2.70981	1.20168	2.88368	2.35548	1.72874	1.505	3.09395	2.11713	3.46519	1.16952	0.610021	0.379737	0.669798	0.03	0.16282	0.834777	1.52203	0.776013	-0.365847	0.0197106	-5.66489	1040	661	220.333	rli:RLO149_c021580	leucine-, isoleucine-, valine-, threonine-, and alanine-binding protein; K01999 branched-chain amino acid transport system substrate-binding protein	rli02010	K01999	branched-chain amino acid transport system substrate-binding protein	ABC transporters								JCVI_PEP_metagenomic.orf.1126664262622.1-SAR324	88		CAM_CRCL_13635	SAR324 cluster bacterium JCVI-SC AAA005
contig_1183866_1_961_-	0.03	0.03	0.03	0.03	0.03	0.03	0.26069	0.03	0.03	0.03	0.03	0.03	0.03	0.03	0.03	0.03	0.03	0.03	0.03	0.03	0.03	0.823063	0.834777	0.0409852	0.0354926	-4.81634	0.731971	-0.450141	1410	961	320.333														or0212-POR4G_contig00100standard	42	hypothetical protein		Poribacteria WGA-4G
contig_1184319_2067_2522_+	0.03	0.03	0.03	0.03	0.444227	0.420076	0.03	0.03	0.03	0.03	0.03	0.03	0.03	0.03	0.03	0.03	0.03	0.03	0.03	0.03	0.03	0.745725	0.834777	0.0683001	0.0491501	-4.34666	0.439238	-1.18693	4658	456	152														AMBAS45_15560-NC_018679	100	BipA protein	CAM_CRCL_1531	Alteromonas macleodii str. 'Balearic Sea AD45'
contig_1184645_371_1060_-	0.03	0.03	0.03	0.03	0.03	0.03	0.03	0.03	0.03	0.03	0.03	0.03	0.03	0.03	0.03	0.03	0.03	0.03	0.03	0.438605	0.03	0.823063	0.834777	0.0494574	0.0397287	-4.65367	0.606583	-0.721224	1122	690	230														POR3G_03430-POR3G_contig_303.304	47	hypothetical protein		Poribacteria WGA-3G
contig_1184691_932_1717_-	0.03	0.03	0.03	0.03	0.03	0.03	0.03	0.03	0.03	0.03	0.03	0.03	0.340107	0.03	0.03	0.03	0.03	0.03	0.03	0.03	0.03	0.823063	0.834777	0.044767	0.0373835	-4.74145	0.670137	-0.577473	3551	786	262										KOG0841	Multifunctional chaperone (14-3-3 family)	Posttranslational modification, protein turnover, chaperones	CELLULAR PROCESSES AND SIGNALING	Pmar_PMAR012478-NW_003216498	64	14-3-3 protein, putative	CAM_CRCL_524	Perkinsus marinus ATCC 50983
contig_1184883_1_914_-	0.03	0.03	0.03	0.03	0.03	0.03	0.03	0.03	0.03	0.03	0.03	0.03	0.03	0.03	0.03	0.03	0.03	0.03	0.03	0.184233	0.03	0.823063	0.834777	0.0373444	0.0336722	-4.8923	0.803333	-0.31593	2333	914	304.667	cpc:Cpar_1909	F0F1 ATP synthase subunit alpha (EC:3.6.3.14); K02111 F-type H+-transporting ATPase subunit alpha [EC:3.6.3.14]	cpc00190||cpc01100	K02111	F-type H+-transporting ATPase subunit alpha [EC:3.6.3.14]	Oxidative phosphorylation || Photosynthesis	3.6.3.14	0000275||0005524||0015986||0015992||0045261||0045262||0046034||0046933	B3QL63					or0032-POR4E_contig00324standard	80	ATP synthase F1 subcomplex alpha subunit		Poribacteria WGA-4E
contig_1185191_3178_3804_-	0.03	0.03	0.03	0.03	0.03	0.03	0.03	0.03	0.03	0.03	0.03	0.03	0.03	0.03	0.03	0.03	0.03	0.03	0.03	0.254831	0.03	0.823063	0.834777	0.0407062	0.0353531	-4.82202	0.736988	-0.440287	3952	627	209	ppm:PPSC2_c5039	protein; K09992 hypothetical protein		K09992	uncharacterized protein				E3EAR4					or3243-POR4E_contig00324standard	83	Uncharacterized protein conserved in bacteria		Poribacteria WGA-4E
contig_1185484_1_1034_+	0.03	0.03	0.03	0.03	0.03	0.03	0.03	0.03	0.03	0.03	0.03	0.03	0.265729	0.03	0.03	0.1764	1.48691	1.51315	0.253575	0.711667	0.937701	0.151158	0.834777	0.27453	0.606116	-0.722335	3.41566	1.77216	1097	1034	344.667	rta:Rta_35270	outer membrane porin protein												gi149926723-NZ_ABCT01000005	82	Gram-negative porin	CAM_CRCL_24285	Limnobacter MED105
contig_1185692_86_1024_-	0.03	0.03	0.03	0.276072	0.03	0.03	0.03	0.03	0.03	0.03	0.03	0.03	0.03	0.03	0.03	0.03	0.03	0.03	0.03	0.03	0.03	0.823063	0.834777	0.0417177	0.0358588	-4.80153	0.719119	-0.475697	3549	939	313														gi34610125-NC_005095	47	capsid protein		Macrobrachium rosenbergii nodavirus
contig_1185761_72_656_-	0.03	0.03	0.03	0.03	0.03	0.03	0.03	0.03	0.03	0.03	0.03	0.03	0.03	0.03	0.03	0.03	0.03	0.03	0.03	0.511945	0.03	0.823063	0.834777	0.0529497	0.0414749	-4.59162	0.566575	-0.819661	1682	585	195	pmb:A9601_10131	ahpC; thioredoxin peroxidase (EC:1.11.1.15); K03386 peroxiredoxin (alkyl hydroperoxide reductase subunit C) [EC:1.11.1.15]		K03386	peroxiredoxin (alkyl hydroperoxide reductase subunit C) [EC:1.11.1.15]		1.11.1.15	0016209||0016491||0051920||0055114	A2BR86	KOG0852	Alkyl hydroperoxide reductase, thiol specific antioxidant and related enzymes	Posttranslational modification, protein turnover, chaperones	CELLULAR PROCESSES AND SIGNALING	A9601_10131-NC_008816	99	ahpC; thioredoxin peroxidase (EC:1.11.1.15); K03386 peroxiredoxin (alkyl hydroperoxide reductase subunit C) [EC:1.11.1.15]	CAM_CRCL_3350	Prochlorococcus marinus str. AS9601
contig_1186061_1_836_+	0.03	0.03	0.03	0.03	0.03	0.242769	0.03	0.03	0.03	0.03	0.03	0.03	0.03	0.03	0.03	0.211073	0.180164	0.182868	0.03	0.198623	0.03	0.580418	0.834777	0.0712142	0.0506071	-4.30452	0.421264	-1.2472	857	836	278.667								0005215||0006810						HIMB5_00009410-NC_018643	75	ligand-binding protein, OpuAC family		alpha proteobacterium HIMB5
contig_1186141_2063_3088_+	0.03	0.03	0.03	0.03	0.03	0.03	0.03	0.03	0.407428	0.03	0.03	0.03	0.03	0.03	0.03	0.03	0.03	0.03	0.03	0.03	0.03	0.823063	0.834777	0.0479728	0.0389864	-4.68089	0.625355	-0.677254	3682	1026	342	acd:AOLE_15375	elongation factor G; K02355 elongation factor G		K02355	elongation factor G			5525	D8JET0					AOLE_15375-NC_014259	94	elongation factor G; K02355 elongation factor G	CAM_CRCL_13178	Acinetobacter oleivorans DR1
contig_1186315_1333_1887_-	0.03	0.03	0.03	0.03	0.03	0.03	0.03	0.03	0.03	0.709742	0.722407	0.03	0.03	0.03	0.03	0.03	0.03	0.03	0.03	0.03	0.03	0.745614	0.834777	0.0953405	0.0626702	-3.99608	0.314662	-1.66813	5437	555	185	adk:Alide2_1986	phosphonate dehydrogenase (EC:1.20.1.1)						0051287||0055114						Alide2_1986-NC_015422	99	phosphonate dehydrogenase (EC:1.20.1.1)	CAM_CRCL_4035519	Alicycliphilus denitrificans K601
contig_1186315_3176_3841_-	0.03	0.03	0.03	0.03	0.313615	0.03	0.03	0.03	0.03	0.03	2.33802	0.03	0.03	0.03	0.03	0.03	0.03	0.03	0.03	0.03	0.03	0.802021	0.834777	0.153411	0.0917057	-3.44684	0.195553	-2.35437	5437	666	222	adk:Alide2_1988	phosphonate ABC transporter periplasmic phosphonate-binding protein; K02044 phosphonate transport system substrate-binding protein	adk02010	K02044	phosphonate transport system substrate-binding protein	ABC transporters		0030288||0031362||0043168||0043225||0055052						Alide2_1988-NC_015422	99	phosphonate ABC transporter periplasmic phosphonate-binding protein; K02044 phosphonate transport system substrate-binding protein	CAM_CRCL_13418	Alicycliphilus denitrificans K601
contig_1186336_24_998_-	0.03	0.03	0.03	0.03	0.03	0.03	0.03	0.03	0.03	0.03	0.03	0.03	0.03	0.03	0.03	0.03	0.03	0.03	0.03	0.319167	0.03	0.823063	0.834777	0.0437698	0.0368849	-4.76082	0.685403	-0.544975	1690	975	325								5515						or1743-POR4G_contig00100standard	57	ABC-type Fe3+-hydroxamate transport system, periplasmic component		Poribacteria WGA-4G
contig_1186470_1163_2044_+	0.03	0.03	0.03	2.12579	0.886632	0.231672	0.03	0.03	0.03	0.03	0.03	0.03	0.03	0.03	0.03	0.201629	0.03	0.174896	0.03	0.03	0.03	0.72525	0.834777	0.195268	0.112634	-3.15029	0.153635	-2.70242	2085	882	294								0004872||0006810||0016020						MASE_05185-NC_018632	96	TonB-dependent receptor	CAM_CRCL_4008773	Alteromonas macleodii ATCC 27126
contig_1186861_6912_7418_-	0.03	0.03	0.03	3.67594	1.52024	0.03	0.03	0.03	0.03	0.03	0.03	0.03	0.03	0.03	0.03	0.03	0.03	0.03	0.03	0.03	0.03	0.766596	0.834777	0.27458	0.15229	-2.71511	0.109258	-3.19419	7425	507	169														gi521331576-CP004849	97	TonB-dependent receptor		Alteromonas macleodii str. 'Ionian Sea U4'
contig_1186923_1_1031_+	0.03	0.03	0.03	0.254114	0.213208	0.03	0.03	0.03	0.03	0.03	0.03	0.03	0.03	0.03	0.03	0.03	0.03	0.03	0.03	0.03	0.03	0.746961	0.834777	0.0493963	0.0396981	-4.65479	0.607333	-0.719439	3581	1031	343.667								0000166||0004812||0004815||0005524||0005737||0006418||0006422						AMEC673_06105-NC_018678	95	aspS; aspartyl-tRNA ligase (EC:6.1.1.12)	CAM_CRCL_1997	Alteromonas macleodii str. 'English Channel 673'
contig_1186975_3076_3969_+	0.03	0.03	0.03	0.03	0.03	0.03	0.03	0.03	0.03	0.03	0.03	0.03	0.03	0.03	0.03	0.199326	0.03	0.03	0.03	0.03	0.03	0.823063	0.834777	0.0380631	0.0340316	-4.87698	0.788164	-0.343432	4036	894	298	pha:PSHAa2063	tig; trigger factor; K03545 trigger factor		K03545	trigger factor			0003755||0005854||0006457||0015031||0051082||0051083	Q3IF53					RNAN_1532-GCA_000296695.1_BAFK01000007	91	trigger factor		Rheinheimera nanhaiensis E407-8
contig_1187103_1885_2589_-	0.03	0.03	0.03	0.03	0.03	0.03	0.03	0.03	0.03	0.03	0.03	0.03	0.03	0.03	0.03	0.03	0.03	0.211274	0.03	0.03	0.03	0.823063	0.834777	0.0386321	0.034316	-4.86497	0.776557	-0.364837	3287	705	235														CAMPEP_0189002078-CAMNT_0032504353	45	PF05548.6: Gametolysin peptidase M11		Karenia brevis CCMP2229
contig_1187103_998_1882_-	0.03	0.03	0.03	0.03	0.03	0.03	0.03	0.03	0.03	0.03	0.03	0.03	0.03	0.03	0.03	0.03	0.03	0.03	0.291216	0.03	0.03	0.823063	0.834777	0.0424389	0.0362194	-4.78709	0.706899	-0.500424	3287	885	295														CAMPEP_0189494800-CAMNT_0033131951	55			Karenia brevis Wilson
contig_1187135_1_897_-	0.03	0.03	0.03	0.287593	1.08288	1.4181	1.51289	0.03	1.32512	2.97403	2.17206	0.280361	0.301732	1.15891	1.22623	1.38008	0.309905	0.457418	0.03	0.187156	0.03	0.354482	0.834777	0.774023	0.402011	-1.31469	0.0387586	-4.68934	897	897	299								0005215||0006810						HIMB5_00003600-NC_018643	76	carbohydrate ABC transporter substrate-binding protein		alpha proteobacterium HIMB5
contig_1187159_114_1160_+	0.03	0.03	0.03	0.250689	0.210408	0.36978	0.241741	0.03	0.769716	0.03	0.397035	0.03	0.03	0.03	0.176407	0.03	0.149902	0.03	0.03	0.164641	0.03	0.517797	0.834777	0.147158	0.088579	-3.49689	0.203862	-2.29433	3749	1047	349	tsa:AciPR4_0471	TonB-dependent receptor							E8V331					AciPR4_0471-NC_014963	39	TonB-dependent receptor	CAM_CRCL_4006562	Terriglobus saanensis SP1PR4
contig_1187159_2143_3033_+	0.03	0.03	0.03	0.289328	0.45399	0.42927	0.03	0.03	0.03	0.03	0.03	0.03	0.03	0.03	0.202041	0.199896	0.03	0.03	0.03	0.03	0.03	0.608478	0.834777	0.0978345	0.0639172	-3.96765	0.30664	-1.70538	3749	891	297														Terro_3590-NC_018014	35	hypothetical protein		Terriglobus roseus DSM 18391
contig_1187159_3051_3728_+	0.03	0.03	0.03	2.41559	2.25876	1.86647	2.31886	0.03	1.17231	0.03	0.03	0.03	0.389504	0.627424	0.256089	0.25327	0.03	0.03	0.03	0.03	0.03	0.526056	0.834777	0.567537	0.298768	-1.7429	0.05286	-4.24168	3749	678	226	aba:Acid345_0933	Cna B-type protein							Q1IT64					Acid345_0933-NC_008009	29	Cna B-type protein	CAM_CRCL_32326401	Koribacter versatilis Ellin345
contig_1187273_1_1026_+	0.03	0.03	0.03	0.255206	0.398201	0.203367	0.246075	0.03	0.784857	0.03	0.03	0.03	0.03	0.227395	0.179404	0.325082	0.03	0.154559	0.03	0.304793	0.334926	0.390736	0.834777	0.176851	0.255889	-1.96641	1.89384	0.921312	1556	1026	342	sus:Acid_4461	TonB-dependent receptor							Q01Y43					Acid_4461-NC_008536	43	TonB-dependent receptor	CAM_CRCL_4006562	Solibacter usitatus Ellin6076
contig_1187282_1_887_-	0.03	0.03	0.03	0.550995	0.03	0.03	0.03	0.03	0.03	0.03	0.03	0.03	0.03	0.03	0.03	0.03	0.03	0.03	0.03	0.03	0.03	0.823063	0.834777	0.0548093	0.0424046	-4.55963	0.547353	-0.869458	1210	887	295.667														gi521323053-CP004846	100	hypothetical protein		Alteromonas macleodii str. 'English Channel 615'
contig_1187283_1127_1888_-	0.03	0.03	0.03	0.93969	1.02153	0.03	0.03	0.03	0.03	0.03	0.03	0.03	0.03	0.03	0.03	0.03	0.03	0.03	0.03	0.03	0.03	0.745854	0.834777	0.120534	0.0752672	-3.73183	0.248891	-2.00641	2574	762	254														AMBAS45_10065-NC_018679	100	hypothetical protein		Alteromonas macleodii str. 'Balearic Sea AD45'
contig_1187393_969_1952_-	3.63418	8.15312	8.55066	0.264818	0.03	0.03	0.03	0.03	0.03	0.03	0.03	0.03	0.03	0.03	0.03	0.03	0.03	0.03	0.03	0.03	0.03	0.69687	0.834777	1.00537	0.517685	-0.949853	0.0298397	-5.06662	2120	984	328								0004872||0006810||0016020						AMBAS45_08675-NC_018679	100	TonB-dependent receptor		Alteromonas macleodii str. 'Balearic Sea AD45'
contig_1187784_1052_1942_+	0.03	0.03	0.03	0.548656	0.03	0.03	0.03	0.03	0.03	0.03	0.03	0.03	0.03	0.03	0.03	0.03	0.03	0.03	0.03	0.03	0.03	0.823063	0.834777	0.0546979	0.042349	-4.56153	0.548467	-0.866523	5303	891	297								0004872||0006810||0016020						amad1_07080-NC_019393	100	TonB-dependent receptor		Alteromonas macleodii AltDE1
contig_1187794_1_1067_+	0.03	0.03	0.03	0.463104	0.03	0.03	0.03	0.03	0.03	0.03	0.03	0.03	0.03	0.03	0.03	0.03	0.03	0.03	0.03	0.03	0.03	0.823063	0.834777	0.050624	0.040312	-4.63265	0.592604	-0.75486	2544	1067	355.667														amad1_10390-NC_019393	99	hypothetical protein		Alteromonas macleodii AltDE1
contig_1188185_1_1025_+	0.03	0.03	0.03	0.03	0.21428	0.03	0.03	0.03	0.03	0.03	0.03	0.03	0.03	0.03	0.03	0.03	0.03	0.03	1.15769	0.03	0.03	0.795782	0.834777	0.0924747	0.0612374	-4.02944	0.324413	-1.6241	1191	1025	341.667								0003774||0005524||0016459		KOG0161	Myosin class II heavy chain	Cytoskeleton	CELLULAR PROCESSES AND SIGNALING	100205834-hmg5043	73	myosin heavy chain, striated muscle-like		Hydra magnipapillata
contig_1188192_1097_2083_+	0.03	0.03	0.03	0.03	0.03	0.210218	0.03	0.03	0.03	0.412226	0.808695	0.03	0.03	0.03	0.03	0.336742	0.03	0.159481	0.03	0.315651	0.03	0.609024	0.834777	0.128239	0.0791194	-3.65983	0.233939	-2.0958	4476	987	329														Rmar_0915-NC_013502	31	TonB-dependent receptor plug	CAM_CRCL_70121	Rhodothermus marinus DSM 4252
contig_1188192_186_1061_+	0.03	0.03	0.03	0.03	0.03	0.233053	0.03	0.03	0.03	0.03	0.03	0.03	0.03	0.03	0.03	0.37561	0.03	0.321776	0.03	0.673693	0.03	0.663835	0.834777	0.100673	0.0653365	-3.93597	0.297995	-1.74664	4476	876	292	sru:SRU_2646	TonB-dependent receptor domain-containing protein						0004872||0006810||0016020	Q2RZ87					Rmar_0915-NC_013502	49	TonB-dependent receptor plug	CAM_CRCL_70121	Rhodothermus marinus DSM 4252
contig_1188192_2104_3102_+	0.03	0.03	0.03	0.03	0.03	0.03	0.03	0.03	0.03	0.03	0.03	0.03	0.03	0.03	0.03	0.181529	0.03	0.03	0.03	0.31222	0.03	0.757096	0.834777	0.0506547	0.0403273	-4.6321	0.592245	-0.755734	4476	999	333	gau:GAU_2079	putative outer membrane protein						0004872||0006810||0016020	C1A9E4					Rmar_0915-NC_013502	47	TonB-dependent receptor plug	CAM_CRCL_70121	Rhodothermus marinus DSM 4252
contig_1188192_3132_3377_+	0.03	0.03	0.03	0.03	0.03	0.03	0.03	0.03	0.03	0.03	0.03	0.03	0.03	0.03	0.03	1.26071	0.03	0.03	0.03	0.03	0.03	0.823063	0.834777	0.0886052	0.0593026	-4.07576	0.338581	-1.56243	4476	246	82														Palpr_2341-NC_014734	35	tonb-dependent receptor plug	CAM_CRCL_70121	Paludibacter propionicigenes WB4
contig_1188192_3384_4031_+	0.03	0.03	0.03	0.03	0.03	0.03	0.03	0.03	0.03	0.03	0.03	0.03	0.03	0.03	0.03	0.03	0.03	0.03	0.03	0.682634	0.03	0.823063	0.834777	0.0610778	0.0455389	-4.45676	0.491177	-1.02569	4476	648	216														Rhom172_1950-NC_015966	39	hypothetical protein		Rhodothermus marinus SG0.5JP17-172
contig_1188356_3370_4047_+	0.03	0.03	0.03	0.03	0.03	0.03	0.03	0.03	0.03	0.03	0.03	0.03	0.03	0.03	0.03	0.03	0.03	0.03	0.03	0.445837	0.03	0.823063	0.834777	0.0498018	0.0399009	-4.64744	0.602388	-0.731235	6824	678	226	dku:Desku_3073	translation elongation factor Tu; K02358 elongation factor Tu		K02358	elongation factor Tu			0003924||0005525						or0190-POR4C_contig00106standard	77	translation elongation factor TU		Poribacteria WGA-4C
contig_1188467_103_720_-	0.03	0.03	0.03	0.403885	0.03	0.03	0.03	0.03	0.03	0.03	0.03	0.03	0.03	0.03	0.03	0.03	0.03	0.03	0.03	0.03	0.03	0.823063	0.834777	0.0478041	0.038902	-4.68401	0.627562	-0.672171	3737	618	206								0008152||0016491||0055114						gi521330948-CP004849	99	succinylglutamic semialdehyde dehydrogenase		Alteromonas macleodii str. 'Ionian Sea U4'
contig_1188583_45_896_-	0.03	0.03	0.03	2.19959	0.695096	1.49141	1.07081	0.03	0.03	0.03	0.48104	0.03	0.03	0.03	0.03	0.207673	0.177344	0.179998	0.03	0.691826	0.03	0.562326	0.834777	0.359752	0.194876	-2.35937	0.0833908	-3.58397	1724	852	284								0005488||0006810||0030288||0031362||0042626||0055052						HIMB59_00004520-NC_018644	74	2-aminoethylphosphonate ABC transporter substrate-binding protein		alpha proteobacterium HIMB59
contig_1188672_1_882_+	0.03	0.03	0.03	0.03	0.03	0.03	0.03	0.03	0.03	0.03	0.03	0.03	0.03	0.03	0.03	0.03	0.03	0.03	0.03	0.349657	0.03	0.823063	0.834777	0.0452218	0.0376109	-4.73271	0.663397	-0.592055	1317	882	294								0005524||0044267						or1962-POR4E_contig00324standard	71	thermosome subunit		Poribacteria WGA-4E
contig_1188767_1029_1793_+	0.03	0.03	0.03	0.03	0.03	0.03	0.03	0.03	1.0424	0.03	0.03	0.03	0.03	0.03	0.03	0.03	0.03	0.03	0.03	0.03	0.03	0.823063	0.834777	0.0782093	0.0541047	-4.2081	0.383586	-1.38238	1855	765	255	aci:ACIAD2654	etfA; electron transfer flavoprotein alpha-subunit; K03522 electron transfer flavoprotein alpha subunit		K03522	electron transfer flavoprotein alpha subunit				Q6F954					HMP0015_2657-NZ_ADMT01000199	86	electron transfer flavoprotein subunit alpha	CAM_CRCL_4010769	Acinetobacter haemolyticus ATCC 19194
contig_1188767_97_846_+	0.03	0.03	0.03	0.03	0.03	0.03	0.03	0.03	0.546322	0.03	0.03	0.03	0.03	0.03	0.03	0.03	0.03	0.03	0.03	0.03	0.03	0.823063	0.834777	0.0545868	0.0422934	-4.56342	0.549584	-0.863589	1855	750	250	acd:AOLE_04175	electron transfer flavoprotein subunit beta (beta-ETF); K03521 electron transfer flavoprotein beta subunit		K03521	electron transfer flavoprotein beta subunit				D8JE82					gi491016739-NZ_BAEB01000023	94	electron transfer flavoprotein subunit beta		Acinetobacter NBRC 100985
contig_1188848_1_887_-	0.03	0.03	0.03	0.811492	0.668852	0.832141	0.03	0.03	0.03	0.03	0.03	2.30865	3.60235	0.03	0.03	0.03	0.03	0.03	0.03	0.347855	0.03	0.650792	0.834777	0.429588	0.229794	-2.12159	0.0698344	-3.83992	2242	887	295.667	dvu:DVU1976 || dvl:Dvul_1196	groEL; chaperonin GroEL; K04077 chaperonin GroEL || groEL; chaperonin GroEL; K04077 chaperonin GroEL	dvu03018	K04077	chaperonin GroEL	RNA degradation || Longevity regulating pathway - worm || Type I diabetes mellitus || Legionellosis || Tuberculosis		0005524||0044267	Q72AL6					or1962-POR4E_contig00324standard	67	thermosome subunit		Poribacteria WGA-4E
contig_1188848_941_1471_-	0.03	0.03	0.03	0.03	0.03	0.03	0.03	0.03	0.759268	0.740465	0.03	0.03	0.03	0.03	0.03	0.03	0.03	0.03	0.03	0.03	0.03	0.745626	0.834777	0.0985587	0.0642794	-3.9595	0.304387	-1.71602	2242	531	177								0005524||0044267						or1962-POR4E_contig00324standard	87	thermosome subunit		Poribacteria WGA-4E
contig_1188949_14_937_-	0.03	0.03	0.03	0.03	0.03	0.03	0.269927	0.03	0.03	0.03	0.445894	0.273045	0.03	0.03	0.03	0.03	0.03	0.168309	0.03	0.945382	0.03	0.664495	0.834777	0.122979	0.0764895	-3.7086	0.243944	-2.03538	1076	924	308	bgl:bglu_1g16840	extracellular ligand-binding receptor; K01999 branched-chain amino acid transport system substrate-binding protein	bgl02010	K01999	branched-chain amino acid transport system substrate-binding protein	ABC transporters			C5AG67					BuboB_010100032150-NZ_ABBE01000993	54	putative ABC-transport systems periplasmic component precursor	CAM_CRCL_13635	Burkholderia ubonensis Bu
contig_1189041_2008_3012_+	0.03	0.03	0.03	0.03	0.03	0.03	0.03	0.03	0.03	0.03	0.03	0.03	0.03	0.03	0.335051	0.331248	0.03	0.03	0.03	0.03	0.03	0.745608	0.834777	0.0588714	0.0444357	-4.49214	0.509585	-0.972604	3511	1005	335	geo:Geob_0681	rho; transcription termination factor Rho; K03628 transcription termination factor Rho	geo03018	K03628	transcription termination factor Rho	RNA degradation		0003715||0003723||0004386||0005524||0006353||0008186	B9M0K8					Geob_0681-NC_011979	82	rho; transcription termination factor Rho; K03628 transcription termination factor Rho	CAM_CRCL_32360364	Geobacter daltonii FRC-32
contig_1190374_1_737_-	0.03	0.03	0.03	0.03	0.286292	0.03	0.03	0.03	0.03	0.03	0.03	0.03	0.03	0.03	0.03	0.03	0.03	0.03	0.03	0.03	0.03	0.823063	0.834777	0.0422044	0.0361022	-4.79177	0.710827	-0.492431	1003	737	245.667	bbe:BBR47_39560	acetamidase/formamidase (EC:3.5.1.-); K01455 formamidase [EC:3.5.1.49]	bbe00630||bbe00910	K01455	formamidase [EC:3.5.1.49]	Cyanoamino acid metabolism || Glyoxylate and dicarboxylate metabolism || Nitrogen metabolism || Carbon metabolism	3.5.1.49	0004328||0016811	C0ZGM4					Oscil6407DRAFT_00027730-Oscil6407DRAFT_Scaffold9.12	72	Predicted acetamidase/formamidase	CAM_CRCL_12030	Oscillatoria formosa PCC 6407
contig_1190476_11_808_-	0.03	0.03	0.03	0.03	0.03	0.03	0.03	0.03	0.03	0.03	0.03	0.03	0.03	0.03	0.03	0.03	0.03	0.03	0.03	0.206653	0.03	0.823063	0.834777	0.038412	0.034206	-4.86961	0.781005	-0.356596	2185	798	266														gi149201971-NZ_ABCL01000002	35	ABC transporter,binding protein	CAM_CRCL_4000205	Roseovarius TM1035
contig_1190489_1_471_+	0.03	0.03	0.03	0.03	0.03	0.03	0.03	0.03	0.03	0.03	0.03	0.03	0.03	0.03	0.03	0.03	0.296533	0.03	0.03	0.03	0.03	0.823063	0.834777	0.0426921	0.036346	-4.78206	0.702707	-0.509005	690	471	157	tps:THAPSDRAFT_7916	FCP_2; hypothetical protein							B8C7W5					CAMPEP_0181239982-CAMNT_0023335791	87	PF00504.16: Chlorophyll A-B binding protein		Haptolina ericina
contig_1190729_1_819_-	0.03	0.03	0.03	0.03	0.03	0.03	0.03	0.03	0.03	0.03	0.03	0.03	0.03	0.03	0.03	0.03	0.03	0.186041	0.03	0.202123	0.03	0.745928	0.834777	0.0456269	0.0378134	-4.72496	0.657507	-0.604922	3787	819	273														or2325-POR4E_contig00324standard	70	hypothetical protein		Poribacteria WGA-4E
contig_1190759_1398_1679_+	0.03	0.03	0.03	0.03	0.03	0.03	0.03	0.03	0.03	0.03	0.03	0.03	0.03	0.03	0.03	0.03	0.03	0.03	0.849774	1.52967	0.03	0.75652	0.834777	0.14045	0.0852248	-3.55258	0.2136	-2.22702	2919	282	94								3677						or0839-POR4C_contig00106standard	65	Bacterial nucleoid DNA-binding protein		Poribacteria WGA-4C
contig_1190857_786_1010_+	0.03	0.03	0.03	0.03	0.03	0.820555	0.03	0.03	0.03	0.03	0.03	0.03	0.03	0.03	0.03	0.03	0.03	0.03	0.03	0.03	0.03	0.823063	0.834777	0.0676455	0.0488227	-4.3563	0.443489	-1.17303	1926	225	75	vch:VCA0744 || vcj:VCD_000575	glpK; glycerol kinase (EC:2.7.1.30); K00864 glycerol kinase [EC:2.7.1.30] || glpK; glycerol kinase (EC:2.7.1.30); K00864 glycerol kinase [EC:2.7.1.30]	vch01100||vch00561	K00864	glycerol kinase [EC:2.7.1.30]	Glycerolipid metabolism || PPAR signaling pathway || Plant-pathogen interaction	2.7.1.30	0004370||0005975||0016773	Q9KLJ9					VFA_002258-NZ_ACZP01000014	98	glycerol kinase	CAM_CRCL_1923	Vibrio furnissii CIP 102972
contig_1190902_98_529_+	0.03	0.03	0.03	0.564864	0.904478	1.26524	0.03	0.03	0.03	0.03	0.03	0.03	0.03	0.03	0.03	0.03	0.03	0.03	0.03	0.03	0.03	0.700029	0.834777	0.155933	0.0929663	-3.42715	0.192391	-2.37789	3386	432	144	amc:MADE_1012870	ndk; mulitfunctional nucleoside diphosphate kinase/apyrimidinic endonuclease/3'-phosphodiesterase (EC:2.7.4.6); K00940 nucleoside-diphosphate kinase [EC:2.7.4.6]	amc01110||amc01100||amc00230||amc00240	K00940	nucleoside-diphosphate kinase [EC:2.7.4.6]	Purine metabolism || Pyrimidine metabolism	2.7.4.6	0004550||0005524||0006165||0006183||0006228||0006241						amad1_13770-NC_019393	100	mulitfunctional nucleoside diphosphate kinase/apyrimidinic endonuclease/3'-phosphodiesterase	CAM_CRCL_4061206	Alteromonas macleodii AltDE1
contig_1191067_54_854_+	0.03	0.03	0.03	0.03	0.03	0.03	0.03	0.03	0.03	0.03	0.03	0.03	0.03	0.03	0.03	0.03	0.500177	0.03	0.03	0.03	0.03	0.823063	0.834777	0.0523894	0.0411947	-4.6014	0.572635	-0.804311	1406	801	267														CAMPEP_0193792390-CAMNT_0038309109	83	PF00504.16: Chlorophyll A-B binding protein		Chrysochromulina polylepis CCMP1757
contig_1191542_1_886_-	0.03	0.03	0.03	0.03	0.03	0.03	0.03	0.03	0.03	0.03	0.03	0.03	0.03	0.03	0.03	0.371709	0.03	0.03	0.03	0.03	0.03	0.823063	0.834777	0.0462719	0.0381359	-4.71271	0.648342	-0.625173	1316	886	295.333	pde:Pden_1671	extracellular solute-binding protein; K12368 dipeptide transport system substrate-binding protein	pde02010||pde02030	K12368	dipeptide transport system substrate-binding protein	ABC transporters || Bacterial chemotaxis			A1B2M4					TRICHSKD4_0451-NZ_GL476301	30	peptide/opine/nickel uptake ABC transporter periplasmic substrate-binding protein	CAM_CRCL_28084	Roseibium TrichSKD4
contig_1191594_175_1023_+	0.03	0.03	0.03	0.03	0.252482	0.239511	0.03	0.03	0.03	0.03	0.03	0.03	0.317095	0.03	0.210551	0.208301	0.03	0.180528	0.03	0.196041	0.03	0.493869	0.834777	0.0964052	0.0632026	-3.98387	0.311187	-1.68415	5267	849	283	geo:Geob_0002	DNA polymerase III, beta subunit (EC:2.7.7.7); K02338 DNA polymerase III subunit beta [EC:2.7.7.7]	geo01100||geo00240||geo03030||geo03430||geo03440||geo00230	K02338	DNA polymerase III subunit beta [EC:2.7.7.7]	Purine metabolism || Pyrimidine metabolism || DNA replication || Mismatch repair || Homologous recombination	2.7.7.7	0003677||0003887||0006260||0008408||0009360	B9M7S2					or0317-POR4E_contig00324standard	69	DNA polymerase III, beta subunit (EC 2.7.7.7)		Poribacteria WGA-4E
contig_1191595_1_508_-	0.03	0.03	0.03	0.03	0.03	0.03	0.03	0.03	0.03	0.03	0.03	0.03	0.509811	0.03	0.03	0.327987	0.03	0.03	0.03	0.03	0.03	0.752711	0.834777	0.067038	0.048519	-4.36531	0.447507	-1.16002	2114	508	169.333														gi448936880-KC465899	39	major capsid		Pelagibacter phage HTVC008M
contig_1191598_948_1655_-	0.03	0.03	0.03	0.03	0.29679	0.03	0.03	0.03	0.03	0.03	0.03	0.03	0.03	0.03	0.03	0.24381	0.03	0.03	0.03	0.627326	0.03	0.716107	0.834777	0.0813298	0.0556649	-4.16709	0.368869	-1.43882	1922	708	236	rba:RB10629	groEL; heat shock protein GroEL; K04077 chaperonin GroEL	rba03018	K04077	chaperonin GroEL	RNA degradation || Longevity regulating pathway - worm || Type I diabetes mellitus || Legionellosis || Tuberculosis		0005524||0044267	Q7TTY9					Psta_3731-NC_013720	77	chaperonin GroEL	CAM_CRCL_32430158	Pirellula staleyi DSM 6068
contig_1191680_1_921_-	0.03	0.03	0.03	0.280881	0.440179	0.223132	0.03	0.03	0.450458	0.849233	0.447249	0.03	0.03	0.249899	0.196437	0.358724	0.166305	0.16876	0.03	0.03	0.03	0.427883	0.834777	0.196726	0.113363	-3.14098	0.152496	-2.71316	921	921	307	sil:SPO0674	tauA; taurine ABC transporter, periplasmic taurine-binding protein; K02051 sulfonate/nitrate/taurine transport system substrate-binding protein	sil02010	K02051	NitT/TauT family transport system substrate-binding protein				Q5LVM6					gi498192866-NZ_AFHZ01000018	95	taurine ABC transporter, periplasmic taurine-binding protein		gamma proteobacterium SCGC AAA001-B15
contig_1191832_2479_3039_+	0.03	0.03	0.03	0.03	0.03	0.347067	0.03	0.03	0.03	0.03	0.03	0.03	0.03	0.03	0.03	0.03	0.03	0.03	0.03	0.03	0.03	0.823063	0.834777	0.0450984	0.0375492	-4.73507	0.665211	-0.588115	4896	561	187	vvy:VV1203	ABC-type oligopeptide transport system, periplasmic component; K02035 peptide/nickel transport system substrate-binding protein	vvy02010	K02035	peptide/nickel transport system substrate-binding protein				Q7MM70					VV1203-NC_005139	79	ABC-type oligopeptide transport system, periplasmic component; K02035 peptide/nickel transport system substrate-binding protein	CAM_CRCL_32346848	Vibrio vulnificus YJ016
contig_1191965_1_879_-	0.03	0.03	0.03	0.03	0.03	0.03	0.03	0.03	0.03	0.459189	0.03	0.03	0.03	0.03	0.03	0.202215	0.03	0.03	0.03	0.671496	0.03	0.715026	0.834777	0.0891857	0.0595929	-4.06872	0.336377	-1.57185	1383	879	293														A3C1DRAFT_03626-A3C1DRAFT_scaffold_117.118	56	ABC-type sugar transport system, periplasmic component		Rhizobium sullae WSM1592
contig_1191965_969_1340_-	0.03	0.03	0.03	0.651132	0.537762	0.03	0.625948	0.03	0.03	0.03	0.03	0.03	0.03	0.03	0.03	0.436928	0.03	0.03	0.03	0.03	0.03	0.632802	0.834777	0.131513	0.0807564	-3.63028	0.228115	-2.13217	1383	372	124								0005215||0006810						A3C1DRAFT_03626-A3C1DRAFT_scaffold_117.118	46	ABC-type sugar transport system, periplasmic component		Rhizobium sullae WSM1592
contig_1192176_1_701_-	0.03	0.03	0.03	0.03	0.03	0.03	0.346252	0.03	0.03	0.03	0.03	0.03	0.03	0.03	0.03	0.03	0.03	0.03	0.03	0.03	0.03	0.823063	0.834777	0.0450596	0.0375298	-4.73582	0.665785	-0.586873	801	701	233.667														NSED_01795-NC_018656	63	prophage MuMc02, head decoration protein		Nitrosopumilus A
contig_1192204_1301_1619_+	0.03	0.03	0.03	0.03	0.03	0.03	0.03	0.03	0.03	0.03	0.03	0.03	0.03	0.03	0.03	0.03	0.03	0.430621	0.03	0.471909	0.03	0.745928	0.834777	0.0701204	0.0500602	-4.32019	0.427835	-1.22487	1620	319	106.333								20037						KSU1_B0261-GCA_000296795.1_BAFH01000002	53	putative nitrate oxidoreductase gamma subunit		planctomycete KSU-1
contig_1192204_621_1244_+	0.03	0.03	0.03	0.03	0.03	0.03	0.03	0.03	0.03	0.03	0.03	0.03	0.03	0.03	0.275654	0.03	0.03	0.03	0.03	0.481823	0.03	0.756692	0.834777	0.0632132	0.0466066	-4.42332	0.474584	-1.07526	1620	624	208	nde:NIDE3278	putative nitrate reductase subunit gamma (EC:1.7.99.4)						20037						NIDE3278-NC_014355	50	putative nitrate reductase subunit gamma (EC:1.7.99.4)	CAM_CRCL_4069661	Nitrospira defluvii
contig_1192282_1906_2877_+	0.03	0.03	0.03	0.03	0.612986	0.578996	1.39847	0.03	0.03	0.03	0.425356	0.03	0.531531	0.03	0.503112	0.652951	0.03	0.03	0.03	0.03	0.03	0.540951	0.834777	0.243972	0.136986	-2.8679	0.122965	-3.02368	2943	972	324	rca:Rcas_0555	laminin G							A7NGT8					or2975-POR4E_contig00324standard	48	hypothetical protein		Poribacteria WGA-4E
contig_1192448_1_952_-	0.03	0.03	0.03	0.03	0.03	0.216843	0.03	0.03	0.03	0.03	0.03	0.03	0.03	0.03	0.03	0.03	0.03	0.03	0.03	0.03	0.03	0.823063	0.834777	0.0388973	0.0344486	-4.85941	0.771262	-0.374707	1215	952	317.333	vha:VIBHAR_01301	flagellin						0005198||0006928||0009288||0044781||0071973	A7MT74					VFA_000766-NZ_ACZP01000012	94	flagellin protein FlaD	CAM_CRCL_24713	Vibrio furnissii CIP 102972
contig_1192564_1_1001_+	0.03	0.03	0.03	0.03	0.03	0.563091	0.03	0.03	0.03	0.03	0.03	0.03	0.03	0.03	0.03	0.03	0.03	0.03	0.03	0.03	0.03	0.823063	0.834777	0.0553853	0.0426926	-4.54987	0.54166	-0.884541	2820	1001	333.667								0004872||0006810||0016020						Fbal_1163-NC_014541	58	TonB-dependent receptor	CAM_CRCL_4008773	Ferrimonas balearica DSM 9799
contig_1192564_1061_2047_+	0.03	0.03	0.03	0.03	0.03	0.750871	0.03	0.03	0.03	0.03	0.03	0.03	0.03	0.03	0.03	0.03	0.03	0.03	0.03	0.03	0.03	0.823063	0.834777	0.0643272	0.0471636	-4.40618	0.466366	-1.10047	2820	987	329	spl:Spea_2653	TonB-dependent receptor						0004872||0006810||0016020	A8H5Y6					Spea_2653-NC_009901	57	TonB-dependent receptor	CAM_CRCL_4008773	Shewanella pealeana ATCC 700345
contig_1192564_2215_2818_+	0.03	0.03	0.03	0.03	0.03	0.324495	0.03	0.03	0.03	0.03	0.03	0.03	0.03	0.03	0.03	0.03	0.03	0.03	0.03	0.03	0.03	0.823063	0.834777	0.0440236	0.0370118	-4.75587	0.681453	-0.553313	2820	604	201.333	spl:Spea_2653	TonB-dependent receptor						0004872||0006810||0016020	A8H5Y6					Fbal_1163-NC_014541	59	TonB-dependent receptor	CAM_CRCL_4008773	Ferrimonas balearica DSM 9799
contig_1193072_1_745_-	0.03	0.03	0.03	0.03	0.03	0.03	0.03	0.03	0.03	0.03	0.03	0.03	0.03	0.03	0.03	0.03	0.03	0.201541	0.03	0.03	0.03	0.823063	0.834777	0.0381686	0.0340843	-4.87475	0.785986	-0.347424	948	745	248.333	pha:PSHAb0299	putative TonB-dependent outer membrane receptor						0004872||0006810||0016020	Q3IBW4					gi495401480-NZ_BADX01000001	91	TonB-denpendent receptor		Pseudoalteromonas BSi20480
contig_1193273_102_686_-	0.03	0.03	0.03	0.03	0.03	0.03	0.03	0.03	0.03	0.03	0.03	0.03	0.03	0.03	0.292031	0.03	0.03	0.03	0.03	0.03	0.03	0.823063	0.834777	0.0424777	0.0362388	-4.78632	0.706253	-0.501742	1349	585	195														ORF05636-TG_gvs_533	35	hypothetical protein		Verrucomicrobium spinosum DSM 4136
contig_1193395_1976_2433_-	0.03	0.03	0.03	2.048	2.91692	0.418373	0.03	0.03	0.03	0.03	0.03	0.03	0.03	0.03	0.03	0.03	0.03	0.03	0.03	0.03	0.03	0.730251	0.834777	0.282062	0.156031	-2.6801	0.10636	-3.23298	2435	458	152.667								0003746||0005622||0006414						MASE_04445-NC_018632	88	tsf; elongation factor Ts	CAM_CRCL_4006981	Alteromonas macleodii ATCC 27126
contig_1193395_425_982_-	0.03	0.03	0.03	0.858176	0.03	0.03	0.03	0.03	0.03	0.03	0.03	0.03	0.03	0.03	0.03	0.03	0.03	0.03	0.03	0.03	0.03	0.823063	0.834777	0.069437	0.0497185	-4.33007	0.432047	-1.21074	2435	558	186	amc:MADE_1005335	frr; ribosome recycling factor; K02838 ribosome recycling factor		K02838	ribosome recycling factor			0005737||0006412||0008135						amad1_04845-NC_019393	100	ribosome recycling factor	CAM_CRCL_33830273	Alteromonas macleodii AltDE1
contig_1193430_1075_1917_-	0.03	0.03	0.03	3.04503	0.03	0.03	0.03	0.03	0.03	0.03	0.03	0.296398	0.03	0.03	0.03	0.03	0.178917	0.181599	0.03	0.197223	0.03	0.779824	0.834777	0.208532	0.119266	-3.06775	0.143863	-2.79723	6463	843	281	cat:CA2559_05660	hypothetical protein							A3U7K4					CA2559_05660-NC_014230	43	hypothetical protein		Croceibacter atlanticus HTCC2559
contig_1193430_3438_3935_-	0.03	0.03	0.03	1.42193	0.03	0.03	0.03	0.03	0.03	0.03	0.03	0.03	0.03	0.03	0.03	0.03	0.03	0.03	0.03	0.03	0.03	0.823063	0.834777	0.0962826	0.0631413	-3.98527	0.311583	-1.68231	6463	498	166	cat:CA2559_05670	outer membrane protein							A3U7K6					CA2559_05670-NC_014230	69	outer membrane protein	CAM_CRCL_32327646	Croceibacter atlanticus HTCC2559
contig_1193430_3983_4954_-	0.03	0.03	0.03	0.505435	0.03	0.03	0.03	0.03	0.03	0.03	0.03	0.03	0.03	0.03	0.03	0.03	0.03	0.03	0.03	0.03	0.03	0.823063	0.834777	0.0526397	0.0413199	-4.59702	0.569912	-0.81119	6463	972	324	cat:CA2559_05670	outer membrane protein						0004872||0006810||0016020	A3U7K6					CA2559_05670-NC_014230	51	outer membrane protein	CAM_CRCL_32327646	Croceibacter atlanticus HTCC2559
contig_1193430_4981_5793_-	0.03	0.03	0.03	0.03	0.03	0.03	0.03	0.03	0.03	0.03	0.03	0.306228	0.03	0.03	0.03	0.03	0.03	0.03	0.03	0.03	0.03	0.823063	0.834777	0.0431537	0.0365769	-4.77292	0.695189	-0.524523	6463	813	271	cat:CA2559_05670	outer membrane protein							A3U7K6					CA2559_05670-NC_014230	53	outer membrane protein	CAM_CRCL_32327646	Croceibacter atlanticus HTCC2559
contig_1193430_5982_6457_-	0.03	0.03	0.03	0.515423	0.03	0.03	0.03	0.03	0.03	0.03	0.03	0.03	0.03	0.03	0.03	0.03	0.03	0.03	0.03	0.03	0.03	0.823063	0.834777	0.0531154	0.0415577	-4.58874	0.564808	-0.824167	6463	476	158.667	cat:CA2559_05670	outer membrane protein							A3U7K6					CA2559_05670-NC_014230	58	outer membrane protein	CAM_CRCL_32327646	Croceibacter atlanticus HTCC2559
contig_1193574_1_809_+	0.03	0.03	0.03	0.03	0.03	0.03	0.03	0.03	0.03	0.03	0.03	0.03	0.03	0.03	0.219479	0.217116	0.03	0.03	0.03	0.03	0.03	0.745608	0.834777	0.0479331	0.0389665	-4.68162	0.625872	-0.67606	809	809	269.667	lpn:lpg1340	fliC; flagellin; K02406 flagellin	lpn02040||lpn02020	K02406	flagellin	Two-component system || Flagellar assembly || Plant-pathogen interaction || Salmonella infection || Legionellosis		0005198||0009288||0071973	Q5ZVV0					lp12_1278-NC_016811	49	fliC; flagellin	CAM_CRCL_32380662	Legionella pneumophila subsp. pneumophila ATCC 43290
contig_1193676_2026_2568_+	1.66283	0.03	0.03	0.03	0.03	0.03	0.03	0.03	0.03	0.03	0.03	0.03	0.03	0.03	0.03	0.03	0.03	0.03	0.455739	0.03	0.606159	0.221079	0.834777	0.155463	0.380811	-1.39285	3.89905	1.96312	2808	543	181	pmh:P9215_17201	atpH; F0F1 ATP synthase subunit delta (EC:3.6.3.14); K02113 F-type H+-transporting ATPase subunit delta [EC:3.6.3.14]	pmh00190||pmh01100||pmh00195	K02113	F-type H+-transporting ATPase subunit delta	Oxidative phosphorylation || Photosynthesis	3.6.3.14	0000275||0015986||0045261||0045262||0046933	A8G6V2					P9215_17201-NC_009840	72	atpH; F0F1 ATP synthase subunit delta (EC:3.6.3.14); K02113 F-type H+-transporting ATPase subunit delta [EC:3.6.3.14]	CAM_CRCL_4000252	Prochlorococcus marinus str. MIT 9215
contig_1193723_1161_2036_+	0.03	0.03	0.03	0.293768	0.245625	0.436107	0.03	0.03	0.03	0.03	0.468683	0.03	0.03	0.03	0.03	0.548415	0.03	0.03	0.03	0.03	0.03	0.597684	0.834777	0.117743	0.0738714	-3.75884	0.254793	-1.9726	3032	876	292	rce:RC1_3736	btuB; vitamin B12 transporter BtuB precursor, putative							B6IXQ5					gi497819500-NZ_AFPJ01000052	41	TonB-denpendent receptor		Microbulbifer agarilyticus S89
contig_1193723_94_1110_+	0.03	0.03	0.03	0.484398	0.21573	0.204901	0.03	0.03	0.03	0.03	0.03	0.03	0.03	0.03	0.03	0.327694	0.03	0.03	0.03	0.03	0.03	0.658188	0.834777	0.0829868	0.0564934	-4.14577	0.361503	-1.46792	3032	1017	339	rce:RC1_3736	btuB; vitamin B12 transporter BtuB precursor, putative						0004872||0006810||0016020	B6IXQ5					gi490464445-NZ_ADOP01000017	56	TonB-dependent receptor		Pseudoalteromonas haloplanktis ANT/505
contig_1193771_1448_1960_-	0.03	0.03	0.03	0.03	0.03	0.03	0.03	0.03	0.03	0.03	0.03	0.03	0.03	0.03	0.03	0.03	0.274712	0.03	0.03	0.304793	0.03	0.746057	0.834777	0.0547383	0.0423692	-4.56084	0.548062	-0.867589	4690	513	171	zpr:ZPR_3880	TonB-dependent outer membrane receptor							D5BM46					JoomaDRAFT_2870-GCA_000260115.1_JH651379	75	TonB-linked outer membrane protein, SusC/RagA family		Joostella marina DSM 19592
contig_1193849_1_1013_+	0.03	0.03	0.03	0.03	0.03	0.205592	0.03	0.03	0.03	0.03	0.03	0.03	0.03	0.03	0.03	0.03	0.03	0.03	0.03	0.03	0.03	0.823063	0.834777	0.0383615	0.0341808	-4.87067	0.782033	-0.354698	1248	1013	337.667	vvu:VV1_1313	bifunctional N-succinyldiaminopimelate-aminotransferase/acetylornithine transaminase protein (EC:2.6.1.11); K00821 acetylornithine/N-succinyldiaminopimelate aminotransferase [EC:2.6.1.11 2.6.1.17]	vvu01120||vvu00330||vvu00300||vvu01110||vvu01100	K00821	acetylornithine/N-succinyldiaminopimelate aminotransferase [EC:2.6.1.11 2.6.1.17]	Arginine biosynthesis || Lysine biosynthesis || 2-Oxocarboxylic acid metabolism || Biosynthesis of amino acids	2.6.1.17||2.6.1.11	0003992||0008483||0009016||0030170	P59323					VFA_003958-NZ_ACZP01000018	98	acetylornithine aminotransferase/N-succinyl-L,L-diaminopimelate aminotransferase/succinylornithine transaminase	CAM_CRCL_8656	Vibrio furnissii CIP 102972
contig_1193853_1951_2856_-	0.03	0.03	0.03	0.285034	0.03	0.22633	0.03	0.03	0.03	0.03	0.03	0.03	0.03	0.03	0.03	0.197083	0.03	0.03	0.03	0.03	0.03	0.688454	0.834777	0.0594499	0.0447249	-4.48278	0.504627	-0.986711	3052	906	302								0004872||0006810||0016020						gi88858231-NZ_AAOH01000002	51	TonB-dependent receptor	CAM_CRCL_32661726	Pseudoalteromonas tunicata D2
contig_1193853_995_1867_-	0.03	0.03	0.03	0.03	0.03	0.03	0.03	0.03	0.03	0.03	0.03	0.03	0.03	0.03	0.205588	0.376798	0.03	0.03	0.03	0.03	0.03	0.759038	0.834777	0.0548755	0.0424378	-4.55851	0.546692	-0.8712	3052	873	291														C427_5611-NC_020514	47	hypothetical protein		Glaciecola psychrophila 170
contig_1193979_2167_3003_+	0.03	0.03	0.03	0.03	0.03	0.03	0.03	1.08816	0.03	0.03	0.03	0.03	0.03	0.03	0.03	0.03	0.03	0.03	0.03	0.03	0.03	0.823063	0.834777	0.0803883	0.0551942	-4.17934	0.373188	-1.42202	5207	837	279														AMEC673_19235-NC_018678	99	FG-GAP repeat domain-containing protein		Alteromonas macleodii str. 'English Channel 673'
contig_1193991_1_620_+	0.03	0.03	0.03	0.03	0.03	0.316895	0.03	0.03	0.03	0.03	0.03	0.03	0.03	0.03	0.03	0.03	0.03	0.03	0.03	0.03	0.03	0.823063	0.834777	0.0436617	0.0368308	-4.76294	0.687102	-0.541404	1110	620	206.667	van:VAA_03733	Stringent starvation protein A; K03599 RNA polymerase-associated protein		K03599	RNA polymerase-associated protein			5515						VFA_000226-NZ_ACZP01000004	98	stringent starvation protein A	CAM_CRCL_5230	Vibrio furnissii CIP 102972
contig_1194076_980_1585_-	0.03	0.03	0.03	0.411289	0.03	0.03	0.03	0.03	0.03	0.03	0.664136	0.03	0.03	0.03	0.03	0.03	0.03	0.03	0.03	0.03	0.03	0.753623	0.834777	0.0783536	0.0541768	-4.20618	0.38288	-1.38504	1998	606	202	pae:PA2634	aceA; isocitrate lyase; K01637 isocitrate lyase [EC:4.1.3.1]	pae00630||pae01120||pae01100	K01637	isocitrate lyase [EC:4.1.3.1]	Glyoxylate and dicarboxylate metabolism || Carbon metabolism	4.1.3.1	0004451||0019752	Q9I0K4					PA2634-NC_002516	92	aceA; isocitrate lyase; K01637 isocitrate lyase [EC:4.1.3.1]	CAM_CRCL_4554	Pseudomonas aeruginosa PAO1
contig_1194122_1_949_+	0.03	0.03	0.03	0.03	0.03	0.03	0.03	0.03	0.03	0.03	0.03	0.03	0.286843	0.03	0.03	0.03	0.03	0.03	0.03	0.03	0.03	0.823063	0.834777	0.0422306	0.0361153	-4.79125	0.710385	-0.493327	949	949	316.333														CAMPEP_0171057040-CAMNT_0011512085	45			Gambierdiscus australes
contig_1194204_164_1033_+	0.03	0.03	0.03	0.295588	0.03	0.03	0.03	0.03	0.03	0.03	0.03	0.03	0.03	0.03	0.03	0.03	0.03	0.03	0.03	0.03	0.03	0.823063	0.834777	0.042647	0.0363235	-4.78295	0.703449	-0.507483	9170	870	290								0004252||0006508						MASE_16400-NC_018632	94	peptidase S8/S53 subtilisin kexin sedolisin	CAM_CRCL_4003247	Alteromonas macleodii ATCC 27126
contig_1194270_3454_4313_+	0.03	0.03	0.03	0.836027	0.03	0.03	0.03	0.03	0.03	0.03	0.03	0.03	0.03	0.03	0.03	0.20602	0.03	0.03	0.03	0.03	0.03	0.787943	0.834777	0.0767642	0.0533821	-4.2275	0.390807	-1.35547	4394	860	286.667								0003746||0005515||0005622||0006414						gi126663058-NZ_AAXX01000002	84	translation elongation factor Ts	CAM_CRCL_719	Flavobacteria bacterium BAL38
contig_1196737_586_831_-	0.03	0.03	0.03	0.03	0.03	0.03	0.03	0.03	0.03	1.56356	0.03	0.03	0.03	0.03	0.03	0.03	0.03	0.03	0.03	0.03	0.03	0.823063	0.834777	0.103027	0.0665134	-3.91021	0.291186	-1.77999	1659	246	82														gi498010054-NZ_AFPL01000038	37	C4-dicarboxylate ABC transporter substrate-binding protein		Marinobacterium stanieri S30
contig_1196737_879_1658_-	0.03	0.03	0.03	0.326232	0.514327	0.486089	0.882664	0.03	0.03	0.513663	0.522675	0.03	0.03	0.28965	0.226523	0.224073	0.03	0.521531	0.03	0.572188	0.03	0.370432	0.834777	0.256172	0.143086	-2.80505	0.117109	-3.09408	1659	780	260	sil:SPO0738	TRAP dicarboxylate transporter, DctP subunit						0006810||0030288	Q5LVG4					gi89095419-NZ_AAOW01000043	57	trap dicarboxylate transporter- dctp subunit	CAM_CRCL_33079048	Neptuniibacter caesariensis
contig_1196959_2089_2838_+	0.03	0.03	0.03	0.338082	0.03	0.03	0.03	0.03	0.03	0.03	0.03	0.03	0.03	0.300036	0.03	0.433672	0.532149	0.03	0.03	0.03	0.03	0.639545	0.834777	0.100664	0.0653319	-3.93607	0.298022	-1.74651	4315	750	250	kdi:Krodi_1760	MotA/TolQ/ExbB proton channel; K03561 biopolymer transport protein ExbB		K03561	biopolymer transport protein ExbB			0006810||0008565||0016020						gi126662960-NZ_AAXX01000002	74	hypothetical protein	CAM_CRCL_3315	Flavobacteria bacterium BAL38
contig_1197034_1_997_-	0.03	0.03	0.03	0.03	0.03	0.20841	0.25236	0.03	0.03	0.03	0.03	0.03	0.03	0.436273	0.183749	0.485498	0.03	0.03	0.03	0.03	0.03	0.61701	0.834777	0.0974424	0.0637212	-3.97208	0.307874	-1.69959	1098	997	332.333	sil:SPO0706	oligopeptide ABC transporter, periplasmic oligopeptide-binding protein; K02035 peptide/nickel transport system substrate-binding protein	sil02010	K02035	peptide/nickel transport system substrate-binding protein				Q5LVJ5					gi83952677-NZ_AALY01000004	71	ABC transporter, substrate-binding protein, family 5	CAM_CRCL_32628402	Roseovarius nubinhibens ISM
contig_1197236_2511_2984_+	0.03	0.03	0.03	1.00494	0.03	0.03	0.03	0.03	0.03	0.03	0.03	0.03	0.03	0.03	0.03	0.03	0.03	0.03	0.03	0.03	0.03	0.823063	0.834777	0.0764258	0.0532129	-4.23208	0.392538	-1.3491	4510	474	158								0000906||0009231||0009349						AMBAS45_12950-NC_018679	100	ribH; 6,7-dimethyl-8-ribityllumazine synthase	CAM_CRCL_271	Alteromonas macleodii str. 'Balearic Sea AD45'
contig_1197290_1_691_+	0.03	0.03	0.03	0.03	0.03	0.03	0.03	0.03	0.03	0.03	0.03	0.03	0.03	0.03	0.03	0.24907	0.03	0.03	0.03	0.03	0.03	0.823063	0.834777	0.0404319	0.0352159	-4.82763	0.741989	-0.430531	728	691	230.333	pao:Pat9b_4411	extracellular solute-binding protein family 3							E6WNI8					BCh11DRAFT_2778-NZ_ADNR01000010	62	extracellular solute-binding protein family 3	CAM_CRCL_32721	Burkholderia Ch1-1
contig_1197412_268_1002_+	0.03	0.03	0.03	0.03	0.03	0.03	0.03	0.03	0.03	0.03	0.552838	0.03	0.03	0.03	0.03	0.03	0.03	0.203875	0.03	0.03	0.03	0.774055	0.834777	0.0631768	0.0465884	-4.42389	0.474858	-1.07443	1456	735	245	tro:trd_A0634	branched-chain amino acid ABC transporter, periplasmic amino acid-binding protein, putative; K01999 branched-chain amino acid transport system substrate-binding protein	tro02010	K01999	branched-chain amino acid transport system substrate-binding protein	ABC transporters			B9L4C0					trd_A0634-NC_011961	54	branched-chain amino acid ABC transporter, periplasmic amino acid-binding protein, putative; K01999 branched-chain amino acid transport system substrate-binding protein	CAM_CRCL_13635	Thermomicrobium roseum DSM 5159
contig_1197656_13_1086_+	0.03	0.03	0.03	0.245141	0.381746	0.195619	0.236418	0.03	0.03	0.03	0.03	0.2391	0.03	0.03	0.03	0.03	0.03	0.148993	0.03	0.292512	0.03	0.509001	0.834777	0.102835	0.0664173	-3.9123	0.29173	-1.77729	1491	1074	358	bbt:BBta_1922	putative ABC transporter periplasmic solute-binding protein; K02035 peptide/nickel transport system substrate-binding protein	bbt02010	K02035	peptide/nickel transport system substrate-binding protein				A5ED72					A3M7DRAFT_07674-A3M7DRAFT_scaffold_99.100	39	ABC-type dipeptide transport system, periplasmic component		Bradyrhizobium WSM2254
contig_1197865_1_431_-	0.03	0.03	0.03	0.03	0.03	0.03	0.03	0.03	0.03	0.03	0.03	0.03	0.03	0.03	0.03	0.03	0.03	0.326515	0.03	0.03	0.03	0.823063	0.834777	0.0441198	0.0370599	-4.754	0.679967	-0.556462	545	431	143.667	lan:Lacal_0836	ATP synthase subunit beta; K02112 F-type H+-transporting ATPase subunit beta [EC:3.6.3.14]	lan01100||lan00190	K02112	F-type H+-transporting ATPase subunit beta [EC:3.6.3.14]	Oxidative phosphorylation || Photosynthesis	3.6.3.14	0015992||0046034						BZARG_424-GCA_000224335.2_contig00099	93	ATP synthase F1, beta subunit		Bizionia argentinensis JUB59
contig_1198107_228_1614_+	0.03	0.03	0.03	0.03	0.03	0.03	0.03	0.03	0.03	0.03	0.03	0.03	0.03	0.03	0.03	0.03	0.03	0.12214	0.363347	0.538179	0.03	0.725356	0.834777	0.0744603	0.0522301	-4.25897	0.402899	-1.31151	1615	1387	462.333								0005515||0005524||0006457||0016887||0044267						or2814-POR4E_contig00324standard	83	chaperonin GroL		Poribacteria WGA-4E
contig_1198111_1_1040_+	0.03	0.03	0.03	0.03	0.03	0.03	0.03	0.03	0.03	0.03	0.03	0.245936	0.03	0.03	0.03	0.03	0.03	0.03	0.03	0.301094	0.03	0.747326	0.834777	0.0531919	0.041596	-4.58741	0.563996	-0.826244	1326	1040	346.667	cch:Cag_1912	TPR repeat-containing protein							Q3APB3					POR3G_00407-POR3G_contig_303.304	44	Uncharacterized protein conserved in bacteria		Poribacteria WGA-3G
contig_1198115_1_756_-	0.03	0.03	0.03	0.03	0.03	0.03	0.03	0.03	0.03	0.03	0.538315	0.03	0.03	0.297893	0.232762	0.430469	0.03	0.03	0.03	0.03	0.03	0.650352	0.834777	0.0956876	0.0628438	-3.99209	0.31352	-1.67337	756	756	252														POR3G_00339-POR3G_contig_303.304	83	hypothetical protein		Poribacteria WGA-3G
contig_1198393_1_1012_+	0.03	0.03	0.03	0.03	0.03	0.381531	0.03	0.03	0.03	0.03	0.03	0.03	0.03	0.03	0.03	0.03	0.03	0.03	0.03	0.03	0.03	0.823063	0.834777	0.0467396	0.0383698	-4.70389	0.641854	-0.639682	1504	1012	337.333														VFA_003748-NZ_ACZP01000017	92	peptide ABC transporter peptide-binding protein	CAM_CRCL_7791	Vibrio furnissii CIP 102972
contig_1198499_2053_2850_+	0.03	0.03	0.03	0.03	0.266701	0.03	0.30781	0.03	0.03	0.03	0.03	0.03	0.03	0.03	0.22209	0.03	0.03	0.03	0.03	0.383305	0.03	0.637844	0.834777	0.0804718	0.0552359	-4.17825	0.372802	-1.42352	3006	798	266	rca:Rcas_2255	oxidoreductase domain-containing protein						16491	A7NLF5					POR3G_02418-POR3G_contig_303.304	76	Predicted dehydrogenases and related proteins		Poribacteria WGA-3G
contig_1198590_3138_4265_+	0.03	0.03	0.03	0.03	0.03	0.03	0.03	0.03	0.03	0.03	0.03	0.22909	0.03	0.03	0.03	0.03	0.03	0.03	0.03	0.779834	0.03	0.781813	0.834777	0.0751869	0.0525934	-4.24897	0.399006	-1.32552	4328	1128	376	nde:NIDE3236 || nde:NIDE3256	nxrB1; putative nitrate oxidoreductase subunit beta (EC:1.7.99.4); K00371 nitrate reductase 1, beta subunit [EC:1.7.99.4] || nxrB2; putative nitrate oxidoreductase subunit beta (EC:1.7.99.4)	nde02020||nde00910||nde01120	K00371	nitrate reductase beta subunit [EC:1.7.99.4]	Nitrogen metabolism || Two-component system	1.7.99.4	0008940||0051536						NIDE3236-NC_014355	94	nxrB1; putative nitrate oxidoreductase subunit beta (EC:1.7.99.4); K00371 nitrate reductase 1, beta subunit [EC:1.7.99.4]	CAM_CRCL_5603	Nitrospira defluvii
contig_119861_340_609_+	0.03	0.03	0.03	0.03	0.729583	2.00639	0.03	0.03	0.03	0.03	0.03	0.03	0.03	0.03	0.03	0.03	0.03	0.03	0.03	0.03	0.03	0.771815	0.834777	0.157427	0.0937136	-3.4156	0.190564	-2.39165	611	270	90	van:VAA_02918	hypothetical protein; K06078 murein lipoprotein		K06078	murein lipoprotein			19867						VFA_002704-NZ_ACZP01000014	56	outer membrane lipoprotein	CAM_CRCL_4831359	Vibrio furnissii CIP 102972
contig_1199025_409_915_-	0.03	0.03	0.03	0.03	0.03	1.08251	0.03	0.03	0.03	0.03	0.03	0.03	0.03	0.429461	0.03	0.925723	0.03	0.282067	0.03	0.03	0.03	0.673373	0.834777	0.153798	0.0918992	-3.4438	0.195061	-2.35801	1784	507	169	tgr:Tgr7_0037 || tgr:Tgr7_2221	sulfur oxidation protein SoxY-like protein || sulfur oxidation protein SoxY-like protein							B8GSV6					Rifp1Sym_am00200-GCA_000224455.2_Rifp1Symam	45	CheW protein		endosymbiont of Riftia pachyptila (vent Ph05)
contig_1199127_940_1536_-	0.03	0.03	0.03	0.03	0.03	0.03	0.03	0.03	0.03	0.03	0.03	0.03	0.03	0.03	0.03	0.03	0.03	0.03	0.03	0.266129	0.03	0.823063	0.834777	0.0412442	0.0356221	-4.81108	0.727375	-0.45923	2393	597	199														POR3G_01350-POR3G_contig_303.304	54	hypothetical protein		Poribacteria WGA-3G
contig_1199132_1_943_-	0.03	0.03	0.03	0.275028	0.230305	0.218627	0.03	0.03	0.03	0.03	0.03	0.03	0.03	0.03	0.03	0.03	0.03	0.03	0.03	0.03	0.03	0.685379	0.834777	0.0601885	0.0450943	-4.47091	0.498434	-1.00453	1689	943	314.333								0004352||0019551						AMBAS45_10085-NC_018679	95	NAD-specific glutamate dehydrogenase		Alteromonas macleodii str. 'Balearic Sea AD45'
contig_1199155_50_979_-	0.03	0.03	0.03	0.03	0.03	0.03	0.268379	0.03	0.446389	0.435652	0.03	0.03	0.03	0.03	1.01896	0.518313	0.03	0.03	0.03	0.03	0.03	0.627794	0.834777	0.150842	0.0904212	-3.4672	0.198883	-2.33001	1402	930	310														POR3G_01738-POR3G_contig_303.304	39	hypothetical protein		Poribacteria WGA-3G
contig_1199841_1955_2467_-	0.03	0.03	0.03	0.480412	0.03	0.03	0.03	0.03	0.03	0.03	0.03	0.03	0.03	0.03	0.03	0.03	0.03	0.03	0.03	0.03	0.03	0.823063	0.834777	0.0514482	0.0407241	-4.61797	0.583111	-0.778157	2552	513	171								0004332||0006096						MASE_03585-NC_018632	100	fructose-1,6-bisphosphate aldolase (EC:4.1.2.13)	CAM_CRCL_7959	Alteromonas macleodii ATCC 27126
contig_1200109_1499_1825_-	0.03	0.03	0.03	0.736609	0.607637	0.03	0.03	0.03	0.03	0.03	0.03	0.716769	0.03	0.03	0.03	0.03	0.03	0.03	0.03	0.461097	0.03	0.634492	0.834777	0.144386	0.0871932	-3.51964	0.207776	-2.2669	1870	327	109	vok:COSY_0903	yajC; preprotein translocase YajC subunit; K03210 preprotein translocase subunit YajC	vok03060||vok03070	K03210	preprotein translocase subunit YajC	Protein export || Bacterial secretion system		0005887||0009306||0015450	A5CVL8					BGP_3764-NZ_ABBZ01001925	42	preprotein translocase	CAM_CRCL_656	Beggiatoa PS
contig_1200709_2087_3037_+	0.03	0.03	0.03	0.272967	0.03	0.03	0.03	0.03	0.03	0.03	0.03	0.03	0.03	0.03	0.03	0.03	0.03	0.03	0.03	0.03	0.03	0.823063	0.834777	0.0415698	0.0357849	-4.8045	0.721677	-0.470575	3319	951	317								0003857||0006631||0016491||0055114						amad1_06670-NC_019393	93	multifunctional fatty acid oxidation complex subunit alpha		Alteromonas macleodii AltDE1
contig_1200860_1_811_-	0.03	0.03	0.03	0.314909	0.03	0.03	0.03	0.03	0.03	0.03	0.03	0.03	0.03	0.03	0.03	0.03	0.03	0.03	0.03	0.03	0.03	0.823063	0.834777	0.0435671	0.0367835	-4.7648	0.688593	-0.538276	2322	811	270.333								0005509||0007155						gi126662605-NZ_AAXX01000001	60	outer membrane protein OmpA family P60	CAM_CRCL_26150	Flavobacteria bacterium BAL38
contig_1202018_512_850_+	10.4917	5.92465	4.97651	0.03	0.03	0.03	0.03	0.03	0.03	0.03	0.03	0.03	0.03	0.03	0.03	0.03	0.03	0.03	0.03	0.03	6.49012	0.0740064	0.834777	1.35205	3.92108	1.97125	4.80022	2.2631	2275	339	113	pmh:P9215_17311	glnB; nitrogen regulatory protein P-II; K04752 nitrogen regulatory protein P-II 2		K04752	nitrogen regulatory protein P-II 2			0006808||0030234	A8G6W3					gi488893935-NZ_DS999537	80	nitrogen regulatory protein P-II	CAM_CRCL_6528487	Prochlorococcus marinus str. MIT 9202
contig_120205_52_554_+	0.03	0.03	0.03	0.03	0.03	0.383628	0.03	0.03	0.03	0.03	0.03	0.03	0.03	0.835276	0.639496	0.631897	0.529154	0.284071	0.03	0.03	0.03	0.558381	0.834777	0.178739	0.10437	-3.26023	0.167842	-2.57482	554	503	167.667								3924		KOG1376	Alpha tubulin	Cytoskeleton	CELLULAR PROCESSES AND SIGNALING	CAMPEP_0190305602-CAMNT_0034038891	92	PF00091.20: Tubulin/FtsZ family, GTPase domain PF03953.12: Tubulin C-terminal domain		Oxyrrhis marina
contig_1202205_351_869_-	0.03	0.03	0.03	0.03	0.393945	0.715452	0.03	0.03	0.03	0.756892	0.03	0.03	0.03	0.81045	0.325353	0.613342	0.03	0.522478	0.03	0.573233	0.03	0.46117	0.834777	0.242912	0.136456	-2.87349	0.123502	-3.0174	1921	519	173	mno:Mnod_0400	family 5 extracellular solute-binding protein; K02035 peptide/nickel transport system substrate-binding protein	mno02010	K02035	peptide/nickel transport system substrate-binding protein				B8IB49					P24_05289-GCA_000299935.1_contig4	49	family 5 extracellular solute-binding protein		Oceanibaculum indicum P24
contig_1202205_896_1920_-	0.03	0.03	0.03	0.03	0.398561	0.203536	0.03	0.03	0.03	0.03	0.03	0.249096	0.267799	0.425174	0.179549	0.03	0.152475	0.528724	0.255538	0.305061	0.335224	0.294372	0.834777	0.171464	0.253344	-1.98083	1.95507	0.967221	1921	1025	341.667	mno:Mnod_0400	family 5 extracellular solute-binding protein; K02035 peptide/nickel transport system substrate-binding protein	mno02010	K02035	peptide/nickel transport system substrate-binding protein				B8IB49					Mnod_0400-NC_011894	57	family 5 extracellular solute-binding protein; K02035 peptide/nickel transport system substrate-binding protein	CAM_CRCL_32347974	Methylobacterium nodulans ORS 2060
contig_1202537_3150_4040_+	0.03	0.03	0.03	0.289328	0.241995	0.03	0.03	0.03	0.03	0.03	0.03	0.282047	0.303562	0.03	0.546122	1.04937	0.170895	0.603728	0.03	0.346428	0.381127	0.523326	0.834777	0.21641	0.298769	-1.7429	1.76114	0.816507	6031	891	297	kdi:Krodi_1824	RagB/SusD domain protein												gi149371622-NZ_ABCO01000006	44	putative outer membrane protein, probably involved in nutrient binding	CAM_CRCL_4018057	unidentified eubacterium SCB49
contig_1202825_1_921_-	0.03	0.03	0.03	0.280881	0.235089	0.609397	0.511417	0.03	0.03	0.03	0.03	0.03	0.294652	0.03	0.03	0.194362	0.166305	0.16876	0.03	0.489182	0.03	0.476948	0.834777	0.157621	0.0938106	-3.41411	0.19033	-2.39343	1482	921	307	bgl:bglu_1g16840	extracellular ligand-binding receptor; K01999 branched-chain amino acid transport system substrate-binding protein	bgl02010	K01999	branched-chain amino acid transport system substrate-binding protein	ABC transporters			C5AG67					bglu_1g16840-NC_012724	50	Extracellular ligand-binding receptor; K01999 branched-chain amino acid transport system substrate-binding protein	CAM_CRCL_13635	Burkholderia glumae BGR1
contig_1202839_61_1005_-	0.03	0.03	0.03	0.03	0.03	0.03	0.03	0.03	0.03	0.03	0.03	0.03	0.03	0.03	0.03	0.03	0.03	0.165236	0.03	0.179173	0.03	0.745928	0.834777	0.0435433	0.0367717	-4.76526	0.688969	-0.537488	1185	945	315	kvu:EIO_2906	extracellular solute-binding protein							E3F4T1					EIO_2906-NC_014621	27	extracellular solute-binding protein	CAM_CRCL_28084	Ketogulonicigenium vulgare Y25
contig_1202883_1_959_-	0.03	0.03	0.03	0.03	0.03	0.215479	0.03	0.03	0.03	0.03	0.03	0.03	0.03	0.03	0.03	0.03	0.03	0.03	0.03	0.03	0.03	0.823063	0.834777	0.0388324	0.0344162	-4.86077	0.772552	-0.372297	3246	959	319.667	rba:RB8970	groEL; 60 kDa chaperonin 5; K04077 chaperonin GroEL	rba03018	K04077	chaperonin GroEL	RNA degradation || Longevity regulating pathway - worm || Type I diabetes mellitus || Legionellosis || Tuberculosis		0005524||0044267	Q7UM97					Psta_3025-NC_013720	78	chaperonin GroEL	CAM_CRCL_32430158	Pirellula staleyi DSM 6068
contig_1202897_344_996_-	0.03	0.03	2.59794	0.03	0.03	0.03	0.03	0.03	0.03	0.03	0.03	0.03	0.03	0.03	0.03	0.03	0.03	0.03	0.03	0.03	0.03	0.823063	0.834777	0.152283	0.0911415	-3.45575	0.197002	-2.34372	996	653	217.667										KOG0327	Translation initiation factor 4F, helicase subunit (eIF-4A) and related helicases	Translation, ribosomal structure and biogenesis	INFORMATION STORAGE AND PROCESSING	CAMPEP_0118819696-CAMNT_0006750005	87	TIGR01389: recQ: ATP-dependent DNA helicase RecQ PF00270.24: DEAD/DEAH box helicase PF00271.26: Helicase conserved C-terminal domain		Phaeocystis sp. CCMP2710
contig_1203133_1_845_-	0.03	0.03	0.03	0.303445	0.253535	0.240503	0.292358	0.03	0.488274	0.476458	0.484777	0.03	0.03	0.03	0.211406	0.03	0.03	0.03	0.03	0.363654	0.03	0.427909	0.834777	0.165448	0.097724	-3.35514	0.181326	-2.46334	845	845	281.667								0005215||0006810						SpiGrapes_0516-NC_016633	30	sugar ABC transporter periplasmic protein		Sphaerochaeta pleomorpha str. Grapes
contig_1203492_1_970_-	0.03	0.03	0.03	0.03	0.419458	0.396752	0.487098	0.03	0.429218	0.807849	0.426171	0.03	0.03	0.447581	0.188029	0.342118	0.03	0.16175	0.03	0.03	0.03	0.415592	0.834777	0.211239	0.12062	-3.05146	0.142019	-2.81584	1308	970	323.333														PJE062_3909-NZ_DS996811	41	ABC transporter, periplasmic binding protein	CAM_CRCL_23694	Pseudovibrio JE062
contig_1203804_1_386_-	0.03	0.03	0.03	0.628604	0.03	0.03	0.03	0.03	0.03	0.03	0.03	0.03	0.03	0.03	0.03	0.03	0.03	0.03	0.03	0.03	0.03	0.823063	0.834777	0.058505	0.0442525	-4.4981	0.512777	-0.963596	2532	386	128.667								0008152||0016746						MASE_09110-NC_018632	83	dihydrolipoyltranssuccinate transferase, component of the 2-oxoglutarate dehydrogenase complex	CAM_CRCL_4002459	Alteromonas macleodii ATCC 27126
contig_1203804_467_919_-	0.03	0.03	0.03	0.03	0.44697	0.03	0.03	0.03	0.03	0.03	0.03	0.03	0.03	0.03	0.03	0.03	0.03	0.03	0.03	0.03	0.03	0.823063	0.834777	0.0498557	0.0399279	-4.64646	0.601737	-0.732796	2532	453	151														AMEC673_09440-NC_018678	77	dihydrolipoyltranssuccinate transferase, component of the 2-oxoglutarate dehydrogenase complex		Alteromonas macleodii str. 'English Channel 673'
contig_1203817_1_827_+	0.03	0.03	0.03	0.03	0.03	0.245084	0.03	0.03	0.03	0.03	0.03	0.03	0.03	0.03	0.03	0.03	0.03	0.03	0.03	0.03	0.03	0.823063	0.834777	0.0402421	0.0351211	-4.83152	0.745488	-0.423744	1225	827	275.667	amc:MADE_1019525	TonB-dependent receptor						0004872||0006810||0016020						gi521324511-CP004846	100	TonB-dependent receptor		Alteromonas macleodii str. 'English Channel 615'
contig_1203991_1_943_-	0.03	0.03	0.03	0.275028	0.03	0.03	0.03	0.03	0.03	0.03	0.03	0.03	0.03	0.03	0.03	0.03	0.03	0.03	0.03	0.03	0.03	0.823063	0.834777	0.041668	0.035834	-4.80253	0.719977	-0.473977	2380	943	314.333	amc:MADE_1008920	infB; translation initiation factor IF-2; K02519 translation initiation factor IF-2		K02519	translation initiation factor IF-2			0003743||0003924||0005525||0005737||0006413						amad1_09280-NC_019393	100	translation initiation factor IF-2	CAM_CRCL_32330682	Alteromonas macleodii AltDE1
contig_1204103_1_363_+	0.03	0.03	0.03	1.9396	1.0707	1.01003	0.03	0.03	0.03	0.03	0.03	0.03	0.701471	0.03	0.03	0.03	0.03	0.03	0.03	0.03	0.03	0.657583	0.834777	0.249133	0.139567	-2.84097	0.120418	-3.05388	465	363	121								0003995||0033539||0055114						MASE_10260-NC_018632	100	fadE; acyl-CoA dehydrogenase (EC:1.3.99.3)		Alteromonas macleodii ATCC 27126
contig_1204112_1_1030_+	0.03	0.03	0.03	0.254331	0.03	0.03	0.03	0.03	0.03	0.03	0.03	0.03	0.03	0.03	0.03	0.03	0.03	0.03	0.03	0.03	0.03	0.823063	0.834777	0.0406824	0.0353412	-4.8225	0.737419	-0.439444	3974	1030	343.333								0004252||0006508						AMEC673_09770-NC_018678	95	subtilase family serine protease		Alteromonas macleodii str. 'English Channel 673'
contig_1204112_1099_2007_+	0.03	0.03	0.03	0.284193	0.237797	0.03	0.03	0.03	0.03	0.03	0.03	0.03	0.03	0.03	0.03	0.03	0.03	0.03	0.03	0.03	0.03	0.746961	0.834777	0.0519995	0.0409998	-4.60824	0.576929	-0.793535	3974	909	303								0004252||0006508						MASE_09525-NC_018632	96	subtilase family serine protease	CAM_CRCL_21741	Alteromonas macleodii ATCC 27126
contig_1204157_1_491_+	0.03	0.03	0.03	2.38297	0.414699	0.754541	0.03	0.03	0.03	0.03	0.03	0.03	0.03	0.03	0.03	0.03	0.03	0.03	0.03	0.03	0.03	0.750357	0.834777	0.194867	0.112433	-3.15286	0.153951	-2.69945	2555	491	163.667								3676						amad1_11120-NC_019393	97	30S ribosomal protein S1		Alteromonas macleodii AltDE1
contig_1204491_2_775_-	0.03	0.03	0.03	0.03	0.03	0.03	0.602849	0.03	0.03	0.03	0.03	0.610293	0.65983	0.03	0.03	0.03	0.03	0.03	0.03	1.12278	0.03	0.645592	0.834777	0.166941	0.0984703	-3.34417	0.179705	-2.4763	775	774	258	pgv:SL003B_0823	Twin-arginine translocation pathway signal						0006810||0030288						R2A130_1246-NZ_AEEB01000017	62	hypothetical protein	CAM_CRCL_6076	Ahrensia R2A130
contig_1204503_1067_1472_+	0.03	0.03	0.03	0.03	0.03	0.03	0.03	0.03	0.03	1.88841	0.03	0.03	0.03	0.03	0.03	0.03	0.03	0.03	0.03	0.03	0.03	0.823063	0.834777	0.118496	0.0742478	-3.75151	0.253174	-1.9818	1473	406	135.333	rlg:Rleg_6130	extracellular solute-binding protein family 1; K02027 multiple sugar transport system substrate-binding protein		K02027	multiple sugar transport system substrate-binding protein				C6B9L3					gi118589520-NZ_AAUW01000006	77	putative periplasmic substrate binding component of ABC transporter	CAM_CRCL_4008419	Labrenzia aggregata IAM 12614
contig_1204504_1980_2785_-	0.03	0.03	0.03	0.03	0.03	0.03	0.03	0.03	0.03	0.03	0.03	0.03	0.03	0.03	0.03	0.03	0.185753	0.347117	0.03	0.03	0.03	0.760073	0.834777	0.0525176	0.0412588	-4.59915	0.571237	-0.807839	2787	806	268.667	zpr:ZPR_0690	TonB-dependent receptor Plug domain protein						0004872||0006810||0016020	D5BG86					W5A_04569-GCA_000260835.1_Contig3	50	TonB-dependent receptor plug		Imtechella halotolerans K1
contig_1205268_153_986_-	0.03	0.03	0.03	0.03	0.03	0.03	0.03	0.03	0.03	0.03	0.03	0.03	0.03	0.03	0.03	0.03	0.03	0.03	0.03	0.199027	0.03	0.823063	0.834777	0.0380489	0.0340245	-4.87728	0.788459	-0.342893	1487	834	278	hmo:HM1_1250	hag; flagellin protein; K02406 flagellin	hmo02020||hmo02040	K02406	flagellin	Two-component system || Flagellar assembly || Plant-pathogen interaction || Salmonella infection || Legionellosis		0005198||0009288||0071973	B0TH01					JCVI_PEP_metagenomic.orf.1126664254186.1-SAR324	62		CAM_CRCL_74609	SAR324 cluster bacterium JCVI-SC AAA005
contig_1205402_407_1102_+	0.03	0.03	0.03	0.03	0.03	0.03	0.348524	0.03	0.03	0.03	0.03	0.03	0.03	0.03	0.03	0.03	0.03	0.03	0.03	0.03	0.03	0.823063	0.834777	0.0451678	0.0375839	-4.73374	0.66419	-0.590332	1269	696	232	req:REQ_15370	hypothetical protein							E4WFB1					or0078-POR4E_contig00324standard	37	hypothetical protein		Poribacteria WGA-4E
contig_1205625_1011_2030_+	0.03	0.03	0.03	0.256531	0.400367	0.204387	0.03	0.03	0.03	0.03	0.03	0.03	0.03	0.03	0.03	0.03	0.03	0.03	0.03	0.03	0.03	0.699833	0.834777	0.0667279	0.0483639	-4.36992	0.449587	-1.15333	3279	1020	340								0005509||0007155						AMBAS45_18290-NC_018679	92	OmpA/MotB protein	CAM_CRCL_8360	Alteromonas macleodii str. 'Balearic Sea AD45'
contig_1205625_2154_2978_-	0.03	0.03	0.03	0.310074	0.258954	0.245606	0.03	0.03	0.03	0.03	0.03	0.03	0.03	0.03	0.03	0.03	0.03	0.03	0.03	0.03	0.03	0.685379	0.834777	0.0645064	0.0472532	-4.40344	0.46507	-1.10448	3279	825	275								0005509||0007155						AMBAS45_18290-NC_018679	95	OmpA/MotB protein	CAM_CRCL_8360	Alteromonas macleodii str. 'Balearic Sea AD45'
contig_1205988_1_968_-	0.03	0.03	0.03	0.03	0.615395	0.581265	0.259021	0.03	0.03	0.03	0.03	0.261997	0.281802	0.03	0.188356	0.342763	0.03	0.162023	0.03	0.175629	0.353197	0.304834	0.834777	0.169117	0.261157	-1.93701	2.08848	1.06245	1082	968	322.667														POR3G_00339-POR3G_contig_303.304	53	hypothetical protein		Poribacteria WGA-3G
contig_1206146_928_1850_-	0.03	0.03	0.03	0.530674	1.46252	0.03	0.03	0.03	0.03	0.03	0.03	0.03	0.03	0.03	0.03	0.03	0.03	0.03	0.03	0.03	0.03	0.772272	0.834777	0.122057	0.0760283	-3.71732	0.245788	-2.02452	1851	923	307.667								0003677||0003899||0006351						MASE_17540-NC_018632	100	rpoB; DNA-directed RNA polymerase subunit beta (EC:2.7.7.6)		Alteromonas macleodii ATCC 27126
contig_1206252_1187_1951_+	0.03	0.03	0.03	0.332041	0.03	0.03	0.03	0.03	0.03	0.03	0.03	0.03	0.03	0.03	0.03	0.03	0.03	0.03	0.03	0.03	0.03	0.823063	0.834777	0.0443829	0.0371914	-4.74889	0.675936	-0.565041	3390	765	255								0010181||0016020						amad1_17365-NC_019393	94	Na(+)-translocating NADH-quinone reductase subunit C		Alteromonas macleodii AltDE1
contig_1206289_161_508_-	0.03	0.03	0.03	0.693969	0.57278	0.03	0.03	0.03	1.14276	0.03	1.13427	0.675326	0.730414	1.19395	0.910967	1.76997	1.11222	1.13171	0.03	0.435083	0.03	0.316544	0.834777	0.560639	0.295319	-1.75965	0.0535104	-4.22404	1089	348	116	cre:CHLREDRAFT_131284	DIP13; deflagellation inducible protein							A8J6L2||Q9XF62					CAMPEP_0181442622-CAMNT_0023566553	96			Symbiodinium, Strain CCMP421
contig_1206666_367_740_-	2.40067	0.03	8.9972	0.03	0.03	0.03	0.03	0.03	0.03	0.03	0.03	0.03	0.03	0.03	0.03	0.03	0.365661	0.03	0.03	0.03	0.03	0.775321	0.834777	0.585882	0.307941	-1.69927	0.0512048	-4.28758	740	374	124.667	tps:THAPSDRAFT_11501	FCP3; pt17531-like protein							B8CEQ3					CAMPEP_0191237528-CAMNT_0035154137	94	PF00504.16: Chlorophyll A-B binding protein		Prymnesium parvum Texoma1
contig_1207245_1_1070_-	0.03	0.03	0.03	0.03	0.03	0.03	0.03	0.03	0.03	0.03	0.03	0.03	0.03	0.03	0.03	0.171474	0.03	0.03	0.03	0.03	0.03	0.823063	0.834777	0.0367369	0.0333684	-4.90537	0.816619	-0.292266	1626	1070	356.667	dac:Daci_4617	isocitrate lyase; K01637 isocitrate lyase [EC:4.1.3.1]	dac01120||dac01100||dac00630	K01637	isocitrate lyase [EC:4.1.3.1]	Glyoxylate and dicarboxylate metabolism || Carbon metabolism	4.1.3.1	0004451||0019752	A9C3D5					gi149927832-NZ_ABCT01000014	99	isocitrate lyase	CAM_CRCL_927	Limnobacter MED105
contig_1207573_1179_2087_+	0.03	0.03	0.03	0.03	0.03	0.03	0.03	0.03	0.03	0.03	0.03	0.277056	0.03	0.03	0.03	0.03	0.03	1.15473	0.792958	2.35622	0.03	0.69976	0.834777	0.242427	0.136213	-2.87606	0.123749	-3.01452	2604	909	303														TMO_1722-NC_017956	77	amiC; branched-chain amino acid ABC transporter periplasmic protein		Tistrella mobilis KA081020-065
contig_1207573_2192_2542_+	0.03	0.03	0.03	0.03	0.03	0.03	0.03	0.03	0.03	0.03	0.03	0.03	0.03	0.03	0.03	0.03	0.03	0.758194	0.03	0.431621	0.03	0.756237	0.834777	0.0838007	0.0569003	-4.13542	0.357992	-1.482	2604	351	117														TMO_1722-NC_017956	70	amiC; branched-chain amino acid ABC transporter periplasmic protein		Tistrella mobilis KA081020-065
contig_1207738_2985_3986_-	0.03	0.03	0.03	0.03	0.03	0.03	0.03	0.03	0.03	0.03	0.03	0.03	0.03	0.03	0.03	0.03	0.03	0.03	0.260715	0.03	0.03	0.823063	0.834777	0.0409864	0.0354932	-4.81631	0.73195	-0.450184	4095	1002	334								0008134||0042803||0045502						100201149-hmg11337	53	uncharacterized LOC100201149		Hydra magnipapillata
contig_1207816_418_1083_+	0.03	0.03	0.03	0.03	0.03	0.03	0.03	0.03	0.03	0.03	0.03	0.03	0.03	0.03	0.03	0.03	0.03	0.03	0.377112	0.03	0.03	0.823063	0.834777	0.0465291	0.0382646	-4.70785	0.644758	-0.633171	1571	666	222	pmm:PMM0767	glpX; fructose 1,6-bisphosphatase II (EC:3.1.3.11); K11532 fructose-1,6-bisphosphatase II / sedoheptulose-1,7-bisphosphatase [EC:3.1.3.11 3.1.3.37]	pmm00710||pmm00010||pmm00030||pmm01100||pmm01120||pmm01110||pmm00051	K11532	fructose-1,6-bisphosphatase II / sedoheptulose-1,7-bisphosphatase [EC:3.1.3.11 3.1.3.37]	Glycolysis / Gluconeogenesis || Pentose phosphate pathway || Fructose and mannose metabolism || Methane metabolism || Carbon fixation in photosynthetic organisms || Carbon metabolism	3.1.3.11||3.1.3.37	0006071||0006094||0042132||0050278	Q7V1T8					PMM0767-NC_005072	96	glpX; fructose 1,6-bisphosphatase II (EC:3.1.3.11); K11532 fructose-1,6-bisphosphatase II / sedoheptulose-1,7-bisphosphatase [EC:3.1.3.11 3.1.3.37]	CAM_CRCL_33115150	Prochlorococcus marinus subsp. pastoris str. CCMP1986
contig_1208220_1_987_-	0.03	0.03	0.03	0.03	0.03	0.03	0.03	0.03	0.03	0.03	0.03	0.03	0.03	0.03	0.03	0.03	0.03	0.03	0.03	0.172826	0.03	0.823063	0.834777	0.0368012	0.0334006	-4.90398	0.81519	-0.294791	1449	987	329	met:M446_2210	extracellular solute-binding protein; K02035 peptide/nickel transport system substrate-binding protein	met02010	K02035	peptide/nickel transport system substrate-binding protein				B0UDF0					M446_2210-NC_010511	34	extracellular solute-binding protein; K02035 peptide/nickel transport system substrate-binding protein	CAM_CRCL_28084	Methylobacterium 4-46
contig_1208249_1918_2751_-	0.03	0.03	0.03	0.03	0.03	0.03	0.03	0.03	0.03	0.03	0.03	0.03	0.03	0.03	0.03	0.03	0.03	0.03	0.03	0.199027	0.03	0.823063	0.834777	0.0380489	0.0340245	-4.87728	0.788459	-0.342893	3131	834	278														or1364-POR4C_contig00106standard	51	hypothetical protein		Poribacteria WGA-4C
contig_1208285_414_1007_+	0.03	0.03	0.03	0.418992	0.665984	0.03	0.03	0.03	0.03	0.03	0.03	0.03	0.03	0.03	0.03	0.03	0.03	0.03	0.03	0.03	0.03	0.753136	0.834777	0.0788084	0.0544042	-4.20014	0.38067	-1.39339	3997	594	198								0044262||0046912						AMBLS11_08885-NC_018692	100	citrate synthase		Alteromonas macleodii str. 'Black Sea 11'
contig_1208351_1_1079_+	0.03	0.03	0.03	0.244144	0.555173	0.194852	0.440922	0.03	0.03	0.03	0.03	0.03	0.03	0.217699	0.456195	0.450882	0.146346	0.148441	0.03	0.291295	0.03	0.430969	0.834777	0.165521	0.0977607	-3.3546	0.181245	-2.46398	2358	1079	359.667	nde:NIDE3237	nxrA1; putative nitrate oxidoreductase subunit alpha (EC:1.7.99.4); K00370 nitrate reductase 1, alpha subunit [EC:1.7.99.4]	nde02020||nde00910||nde01120	K00370	nitrate reductase alpha subunit [EC:1.7.99.4]	Nitrogen metabolism || Two-component system	1.7.99.4	0008940||0016491||0055114						kustd1700-CT573072	57	similar to nitrate reductase subunit NarG	CAM_CRCL_5216	Kuenenia stuttgartiensis
contig_1208379_1261_1905_-	0.03	0.03	0.03	0.03	0.03	0.03	0.03	0.03	0.03	0.03	0.03	0.03	0.03	0.03	0.03	0.03	0.03	0.03	0.03	0.248556	0.03	0.823063	0.834777	0.0404074	0.0352037	-4.82813	0.742437	-0.429659	3179	645	215								0003674||0030288||0045861						POR3G_04831-POR3G_contig_303.304	69	HflK protein		Poribacteria WGA-3G
contig_1208429_961_1947_-	0.03	0.03	0.03	0.03	0.41275	0.03	0.03	0.03	0.03	0.03	0.03	0.03	0.03	0.03	0.03	0.03	0.03	0.03	0.03	0.03	0.03	0.823063	0.834777	0.0482262	0.0391131	-4.6762	0.622068	-0.684855	2409	987	329														AMEC673_09525-NC_018678	96	hypothetical protein		Alteromonas macleodii str. 'English Channel 673'
contig_1208463_1_991_-	0.03	0.03	0.03	0.496319	0.411206	0.03	0.03	0.03	0.03	0.03	0.03	0.03	0.03	0.03	0.03	0.03	0.03	0.03	0.03	0.03	0.03	0.746961	0.834777	0.0703583	0.0501792	-4.31677	0.426389	-1.22976	1664	991	330.333														AMBAS45_10070-NC_018679	99	hypothetical protein	CAM_CRCL_24871	Alteromonas macleodii str. 'Balearic Sea AD45'
contig_1208493_1_767_+	0.03	0.03	0.03	0.03	0.03	0.03	0.03	0.03	0.03	0.03	0.03	0.03	0.03	0.03	0.03	0.03	0.03	0.03	0.03	0.213792	0.03	0.823063	0.834777	0.038752	0.034376	-4.86245	0.774153	-0.369309	1927	767	255.667	atm:ANT_05060	xylA; xylose isomerase (EC:5.3.1.5); K01805 xylose isomerase [EC:5.3.1.5]	atm00040||atm00051||atm01100	K01805	xylose isomerase [EC:5.3.1.5]	Pentose and glucuronate interconversions || Fructose and mannose metabolism	5.3.1.5	9045	E8N0Z5					POR3G_01014-POR3G_contig_303.304	75	xylose isomerase, Arthrobacter type		Poribacteria WGA-3G
contig_1208851_82_527_+	0.03	0.03	0.03	0.548074	0.03	0.03	0.03	0.03	0.03	0.03	0.03	0.03	0.03	0.03	0.717391	0.708821	0.03	0.03	0.03	0.03	0.03	0.685745	0.834777	0.119728	0.074864	-3.73958	0.250568	-1.99673	527	446	148.667	gsu:GSU3038	fliC; flagellin FliC; K02406 flagellin	gsu02020||gsu02040	K02406	flagellin	Two-component system || Flagellar assembly || Plant-pathogen interaction || Salmonella infection || Legionellosis		0005198||0009288||0071973	Q748G4					GSU3038-NC_002939	51	fliC; flagellin	CAM_CRCL_32898458	Geobacter sulfurreducens PCA
contig_1208951_69_1123_-	3.39163	0.03	1.61945	0.03	0.03	0.03	0.03	0.03	0.03	0.03	0.03	0.03	0.03	0.03	0.03	0.03	1.10093	0.272271	1.34475	0.16362	0.623089	0.807752	0.834777	0.425511	0.5243	-0.931536	1.46433	0.550241	1207	1055	351.667								0006810||0030288						YUODRAFT_03782-YUODRAFT_scaffold_68.69	56	TRAP-type mannitol/chloroaromatic compound transport system, periplasmic component		Bradyrhizobium elkanii WSM1741
contig_1209128_1_1036_+	0.03	0.03	0.03	0.03	0.212324	0.201694	0.03	0.03	0.03	0.03	0.03	0.03	0.265274	0.03	0.03	0.03	0.03	0.153357	0.03	0.03	0.03	0.637782	0.834777	0.0639357	0.0469678	-4.41218	0.469222	-1.09166	1076	1036	345.333														JCVI_PEP_metagenomic.orf.1126664258012.1-SAR324	73		CAM_CRCL_11170	SAR324 cluster bacterium JCVI-SC AAA005
contig_1209225_388_1011_+	0.03	0.03	0.03	0.03	0.03	0.03	0.03	0.03	0.03	0.03	0.03	0.03	0.420615	0.03	0.03	0.515183	0.231181	0.644413	0.03	1.83729	0.03	0.682748	0.834777	0.196604	0.113302	-3.14175	0.152591	-2.71226	2109	624	208	eba:ebA5005	aldehyde:ferredoxin oxidoreductase,tungsten-containing (EC:1.2.7.-); K03738 aldehyde:ferredoxin oxidoreductase [EC:1.2.7.5]	eba01120||eba00030||eba00010||eba01100	K03738	aldehyde:ferredoxin oxidoreductase [EC:1.2.7.5]	Pentose phosphate pathway || Carbon metabolism	1.2.7.5	0016491||0016625||0033726||0051536||0055114	Q5P143					ebA5005-NC_006513	66	aldehyde:ferredoxin oxidoreductase,tungsten-containing (EC:1.2.7.-); K03738 aldehyde:ferredoxin oxidoreductase [EC:1.2.7.5]	CAM_CRCL_32345345	Aromatoleum aromaticum EbN1
contig_1209242_1_863_-	0.03	0.03	0.03	0.03	0.03	0.03	0.03	0.03	0.478716	0.03	0.03	0.290224	0.03	0.264678	0.03	0.205408	0.175466	0.178086	0.297875	0.356695	0.03	0.480049	0.834777	0.125578	0.0777892	-3.68429	0.238894	-2.06555	863	863	287.667	pat:Patl_1723	TonB-dependent receptor						0004872||0006810||0016020	Q15V44					Patl_1723-NC_008228	56	TonB-dependent receptor	CAM_CRCL_34763	Pseudoalteromonas atlantica T6c
contig_1209557_856_1884_-	0.03	0.03	0.03	0.03	0.213564	0.202862	0.03	0.03	0.03	0.396625	0.03	0.03	0.03	0.03	0.03	0.03	0.03	0.03	0.03	0.03	0.03	0.704508	0.834777	0.064431	0.0472155	-4.4046	0.465615	-1.10279	2453	1029	343	oan:Oant_1906	extracellular solute-binding protein; K02035 peptide/nickel transport system substrate-binding protein	oan02010	K02035	peptide/nickel transport system substrate-binding protein				A6X068					Oant_1906-NC_009667	27	extracellular solute-binding protein; K02035 peptide/nickel transport system substrate-binding protein	CAM_CRCL_19011	Ochrobactrum anthropi ATCC 49188
contig_1209569_188_958_-	1.17997	0.03	0.03	0.03	0.03	0.03	0.03	0.03	0.03	0.03	0.03	0.03	0.03	0.03	0.03	0.03	0.03	0.03	0.629679	0.03	0.03	0.758052	0.834777	0.113317	0.0716584	-3.80272	0.264745	-1.91733	1652	771	257														JCVI_PEP_metagenomic.orf.1126664280264.1-SAR324	89		CAM_CRCL_13789	SAR324 cluster bacterium JCVI-SC AAA005
contig_1209590_1_473_-	0.03	0.03	0.03	0.03	0.03	0.406057	0.03	0.03	0.03	0.03	0.03	0.504786	0.03	0.03	0.03	0.03	0.03	0.03	0.03	0.03	0.03	0.747411	0.834777	0.0705163	0.0502581	-4.3145	0.425434	-1.23299	1806	473	157.667	ote:Oter_0877	ATP synthase F1, alpha subunit (EC:3.6.3.14); K02111 F-type H+-transporting ATPase subunit alpha [EC:3.6.3.14]	ote01100||ote00190	K02111	F-type H+-transporting ATPase subunit alpha [EC:3.6.3.14]	Oxidative phosphorylation || Photosynthesis	3.6.3.14	0015992||0046034	B1ZWN8					ORF06552-TG_gvs_533	80	ATP synthase F1, alpha subunit	CAM_CRCL_212	Verrucomicrobium spinosum DSM 4136
contig_1209756_1_1007_+	0.03	0.03	0.03	0.48891	0.405149	0.383277	0.03	0.03	0.03	0.03	0.03	0.03	0.03	0.03	0.03	0.03	0.03	0.03	0.03	0.03	0.03	0.685379	0.834777	0.0865398	0.0582699	-4.10111	0.346661	-1.5284	3793	1007	335.667	amc:MADE_1019805	phosphoenolpyruvate carboxykinase (EC:4.1.1.49); K01610 phosphoenolpyruvate carboxykinase (ATP) [EC:4.1.1.49]	amc01110||amc01100||amc00620||amc00010||amc00020||amc01120	K01610	phosphoenolpyruvate carboxykinase (ATP) [EC:4.1.1.49]	Glycolysis / Gluconeogenesis || Citrate cycle (TCA cycle) || Pyruvate metabolism || Carbon fixation in photosynthetic organisms || Carbon metabolism	4.1.1.49	0004612||0005524||0006094						gi521334159-CP004849	99	phosphoenolpyruvate carboxykinase		Alteromonas macleodii str. 'Ionian Sea U4'
contig_1210015_345_980_-	0.03	0.03	0.03	0.393304	0.03	0.03	0.03	0.03	0.03	0.03	0.03	0.383103	0.413245	0.03	0.03	0.03	2.00385	1.63752	0.756969	0.03	0.03	0.630517	0.834777	0.287524	0.158762	-2.65506	0.104339	-3.26065	1195	636	212	tps:THAPSDRAFT_10219	hypothetical protein							B8CDK8					CAMPEP_0119230628-CAMNT_0007229099	100	PF00504.16: Chlorophyll A-B binding protein		Pelagomonas calceolata RCC969
contig_1210999_1_756_+	0.03	0.03	0.03	0.03	0.03	0.03	0.03	0.03	0.03	0.03	0.03	0.03	0.03	0.03	0.03	0.03	0.03	0.199045	0.03	0.03	0.03	0.823063	0.834777	0.0380498	0.0340249	-4.87727	0.788441	-0.342925	756	756	252														CAMPEP_0200811738-CAMNT_0046973011	78			Karlodinium micrum, Strain CCMP2283
contig_1211404_924_1832_-	0.03	0.03	0.03	0.284193	0.237797	0.225682	0.03	0.03	0.03	0.03	0.03	0.03	0.03	0.03	0.03	0.03	0.03	0.03	0.03	0.185081	0.03	0.63389	0.834777	0.0687025	0.0493513	-4.34077	0.436665	-1.1954	2020	909	303	bja:bll5056	substrate-binding protein							Q89K55					bll5056-NC_004463	38	substrate-binding protein	CAM_CRCL_32347974	Bradyrhizobium diazoefficiens USDA 110
contig_1211462_1049_1537_+	0.03	0.03	0.03	0.975036	0.416273	0.03	0.03	0.03	0.03	0.03	0.03	0.03	0.03	0.03	0.03	0.03	0.03	0.03	0.03	0.03	0.03	0.766596	0.834777	0.0933956	0.0616978	-4.01864	0.321214	-1.63839	2419	489	163														AMBAS45_12735-NC_018679	100	adenylate kinase	CAM_CRCL_4030123	Alteromonas macleodii str. 'Balearic Sea AD45'
contig_1211469_26_904_-	0.03	0.03	0.03	0.03	0.03	0.03	0.03	0.03	0.03	0.03	0.03	0.03	0.03	0.03	0.03	0.03	0.03	0.03	0.03	0.190374	0.03	0.823063	0.834777	0.0376369	0.0338184	-4.88605	0.797091	-0.327184	2947	879	293								0004872||0006810||0016020						IALB_1016-NC_017464	24	TonB-dependent receptor		Ignavibacterium album JCM 16511
contig_1211890_2423_3049_+	0.03	0.03	0.03	0.03	0.03	0.03	0.03	0.03	0.03	0.03	0.03	0.03	0.03	0.03	0.03	0.03	0.03	0.03	0.03	0.479661	0.03	0.823063	0.834777	0.0514124	0.0407062	-4.61861	0.583516	-0.777155	3267	627	209	rpx:Rpdx1_5017	carboxymethylenebutenolidase (EC:3.1.1.45); K01061 carboxymethylenebutenolidase [EC:3.1.1.45]	rpx01120||rpx00361||rpx00364||rpx01100||rpx00623	K01061	carboxymethylenebutenolidase [EC:3.1.1.45]	Chlorocyclohexane and chlorobenzene degradation || Fluorobenzoate degradation || Toluene degradation	3.1.1.45	0008806||0016787	E6VH55					NIES39_D01500-AP011615	37	probable carboxymethylenebutenolidase	CAM_CRCL_21592	Arthrospira platensis NIES-39
contig_1212030_2145_3041_+	0.03	4.48549	0.03	0.03	0.03	0.03	0.03	0.03	0.03	0.03	0.03	0.03	0.03	0.03	0.03	0.03	0.03	0.03	0.03	0.03	0.03	0.823063	0.834777	0.242166	0.136083	-2.87744	0.123882	-3.01296	3072	897	299														AMBLS11_15210-NC_018692	91	methanol/ethanol family PQQ-dependent dehydrogenase		Alteromonas macleodii str. 'Black Sea 11'
contig_1212211_188_1692_+	0.03	0.03	0.03	0.03	0.03	0.03	0.03	0.03	0.03	0.03	0.03	0.03	0.03	0.03	0.03	0.03	0.03	0.114916	0.03	0.03	0.03	0.823063	0.834777	0.0340436	0.0320218	-4.9648	0.881223	-0.182421	2004	1505	501.667	psm:PSM_B0064	aceA; isocitrate lyase (EC:4.1.3.1); K01637 isocitrate lyase [EC:4.1.3.1]	psm00630||psm01120||psm01100	K01637	isocitrate lyase [EC:4.1.3.1]	Glyoxylate and dicarboxylate metabolism || Carbon metabolism	4.1.3.1	0004451||0019752	E6RQA0					PSM_B0064-NC_014800	94	aceA; isocitrate lyase (EC:4.1.3.1); K01637 isocitrate lyase [EC:4.1.3.1]	CAM_CRCL_4554	Pseudoalteromonas SM9913
contig_1212756_947_1363_-	0.03	0.03	0.03	0.03	0.03	0.03	0.03	0.03	0.03	0.03	0.03	0.03	0.03	0.03	0.03	0.03	0.331048	0.33647	0.03	0.03	0.03	0.745614	0.834777	0.0589294	0.0444647	-4.4912	0.509083	-0.974026	1522	417	139														CAMPEP_0171168444-CAMNT_0011633281	41			Alexandrium catenella, Strain OF101
contig_1213157_17_1003_+	0.928307	0.03	0.03	0.03	0.03	0.03	0.03	0.03	0.03	0.03	0.03	0.03	0.03	0.03	0.03	0.03	0.03	0.03	0.03	0.03	0.03	0.823063	0.834777	0.0727765	0.0513883	-4.28242	0.412221	-1.27851	1396	987	329	rba:RB6911	signal peptide							Q7UPI7					Plabr_1712-NC_015174	40	hypothetical protein	CAM_CRCL_4001241	Planctomyces brasiliensis DSM 5305
contig_1213201_1_972_-	0.03	0.03	0.03	0.267717	0.418657	0.212999	0.258079	0.03	0.03	0.03	0.03	0.03	0.280765	0.03	0.03	0.03	0.159153	0.292959	0.03	0.03	0.03	0.508339	0.834777	0.110016	0.0700078	-3.83634	0.272688	-1.87468	1340	972	324	apb:SAR116_0930	extracellular ligand-binding receptor							D5BSC6					SAR116_0930-NC_014010	76	extracellular ligand-binding receptor	CAM_CRCL_13635	Puniceispirillum marinum IMCC1322
contig_1213237_1083_2093_+	0.03	0.03	0.03	0.03	0.03	0.03	0.03	0.03	0.03	0.03	0.03	0.03	0.03	0.03	0.18162	0.17973	0.03	0.03	0.03	0.03	0.03	0.745608	0.834777	0.04435	0.037175	-4.74952	0.676437	-0.563972	2154	1011	337														CAMPEP_0190447636-CAMNT_0034206283	49			Oxyrrhis marina LB1974
contig_1213492_1_993_-	0.03	0.03	0.03	0.03	0.410438	0.567386	0.476511	0.03	0.03	0.409916	0.416995	0.03	0.03	0.03	0.03	0.334889	0.156422	0.287398	0.03	0.313925	0.03	0.426028	0.834777	0.177804	0.103902	-3.26671	0.168725	-2.56725	2270	993	331	apb:SAR116_0250	TRAP dicarboxylate transporter subunit DctP (EC:4.2.1.20)						0006810||0030288	D5BPZ5					TRICHSKD4_5245-NZ_GL476320	82	trap dicarboxylate transporter- dctp subunit	CAM_CRCL_11025	Roseibium TrichSKD4
contig_1213533_1_869_-	0.03	0.03	0.03	0.03	0.03	0.03	0.03	0.03	0.03	0.03	0.03	0.03	0.03	0.03	0.03	0.204197	0.03	0.177063	0.03	0.03	0.03	0.746565	0.834777	0.0452981	0.0376491	-4.73124	0.662279	-0.594488	1276	869	289.667	mop:Mesop_1678	periplasmic binding protein/LacI transcriptional regulator; K10439 ribose transport system substrate-binding protein	mop02030||mop02010	K10439	ribose transport system substrate-binding protein	ABC transporters || Bacterial chemotaxis								JCVI_PEP_metagenomic.orf.1126664245892.1-SAR324	74		CAM_CRCL_4008665	SAR324 cluster bacterium JCVI-SC AAA005
contig_1213587_970_1542_-	0.03	0.03	0.03	0.03	0.03	0.03	0.416898	0.03	0.03	0.03	0.03	0.03	0.880765	0.03	0.565037	0.294184	0.03	0.03	0.03	0.03	0.03	0.661718	0.834777	0.126994	0.0784972	-3.67121	0.236231	-2.08173	2492	573	191														CAMPEP_0200768394-CAMNT_0046921341	54			Karlodinium micrum, Strain CCMP2283
contig_1213692_1_434_-	0.03	0.03	0.03	0.03	0.03	0.03	0.03	0.03	0.03	0.03	0.03	0.03	0.03	0.03	0.03	0.03	1.47628	1.50233	0.03	0.03	0.03	0.745614	0.834777	0.168981	0.0994907	-3.3293	0.177534	-2.49383	1065	434	144.667														CAMPEP_0200763100-CAMNT_0046915003	60			Karlodinium micrum, Strain CCMP2283
contig_1213893_1_998_-	0.03	0.03	0.03	0.03	0.03	0.03	0.03	0.03	0.03	0.03	0.03	0.03	0.03	0.03	0.03	0.03	0.281578	0.286108	0.03	0.03	0.03	0.745614	0.834777	0.0541755	0.0420878	-4.57046	0.553756	-0.852678	1076	998	332.667														CAMPEP_0190457942-CAMNT_0034217909	46	TIGR02168: SMC_prok_B: chromosome segregation protein SMC		Oxyrrhis marina LB1974
contig_1214078_131_1015_+	0.03	0.03	0.03	0.03	0.03	0.03	0.03	0.03	0.03	0.03	0.03	0.03	0.03	0.03	0.03	0.03	0.17185	0.03	0.03	0.03	0.03	0.823063	0.834777	0.0367548	0.0333774	-4.90499	0.816221	-0.292969	2044	885	295								0006810||0008565||0016020						or2326-POR4E_contig00324standard	65	Biopolymer transport proteins		Poribacteria WGA-4E
contig_1214758_1552_1876_+	2.75809	0.03	0.03	0.03	0.03	0.03	0.03	0.03	0.03	0.03	0.03	0.03	0.03	0.03	0.03	0.03	0.03	0.03	0.03	0.03	0.03	0.823063	0.834777	0.159909	0.0949545	-3.39662	0.187607	-2.41422	1877	325	108.333	cyt:cce_2651	cpcB; phycocyanin beta subunit; K02285 phycocyanin beta chain	cyt00196||cyt01100	K02285	phycocyanin beta chain	Photosynthesis - antenna proteins		0015979||0030089	B1WT77					gi67923118-NZ_AADV02000031	99	Phycocyanin beta subunit	CAM_CRCL_3178	Crocosphaera watsonii WH 8501
contig_1214890_45_1037_+	0.03	0.03	0.03	0.03	0.03	0.03	0.03	0.03	0.03	0.03	0.03	0.03	0.03	0.03	0.03	0.03	0.03	0.03	0.03	0.171963	0.03	0.823063	0.834777	0.0367601	0.0333801	-4.90487	0.816102	-0.293179	1728	993	331	sit:TM1040_0401	formate dehydrogenase alpha subunit (EC:1.2.1.2); K00123 formate dehydrogenase, alpha subunit [EC:1.2.1.2]	sit01120||sit00680||sit00630||sit01100	K00123	formate dehydrogenase major subunit [EC:1.2.1.2]	Glyoxylate and dicarboxylate metabolism || Methane metabolism || Carbon metabolism	1.2.1.2	0008863||0016491||0055114	Q1GJN2					HIMB100_00014610-GCA_000238815.2_contig10	84	anaerobic dehydrogenase, typically selenocysteine-containing		SAR116 cluster alpha proteobacterium HIMB100
contig_1215866_2979_3953_-	0.03	0.03	0.03	0.740958	0.417461	0.212436	0.484754	0.03	0.824342	0.80386	0.818279	0.260332	0.279994	0.860879	0.187219	0.185259	0.287512	0.423224	0.504208	0.46375	0.671753	0.346776	0.834777	0.406963	0.539358	-0.890686	1.65065	0.723033	4251	975	325	amc:MADE_1019625	groEL; chaperonin GroEL; K04077 chaperonin GroEL	amc03018	K04077	chaperonin GroEL	RNA degradation || Longevity regulating pathway - worm || Type I diabetes mellitus || Legionellosis || Tuberculosis		0005524||0044267						amad1_19335-NC_019393	92	chaperonin GroEL	CAM_CRCL_32430158	Alteromonas macleodii AltDE1
contig_1215908_1167_2000_+	0.03	0.03	0.03	0.03	0.03	0.03	0.03	0.03	0.03	0.03	0.03	0.568546	0.614518	0.03	0.03	0.03	0.03	0.183235	0.03	0.03	0.03	0.714022	0.834777	0.0907761	0.0603881	-4.04959	0.330483	-1.59735	2002	834	278														CAMPEP_0179123194-CAMNT_0020821837	51			Pyrodinium bahamense
contig_1216111_360_932_-	0.03	0.03	0.03	0.03	0.03	0.03	0.03	0.03	0.03	0.03	0.03	0.03	0.03	0.03	0.03	0.03	0.249088	0.03	0.03	0.03	0.03	0.823063	0.834777	0.0404327	0.0352164	-4.82761	0.741973	-0.430562	1240	573	191								0005975||0042132||0042578		KOG1458	Fructose-1,6-bisphosphatase	Carbohydrate transport and metabolism	METABOLISM	CAMPEP_0179249758-CAMNT_0020957467	85	PF00316.15: Fructose-1-6-bisphosphatase		Dinophysis acuminata
contig_1216293_1_949_+	0.03	0.03	0.03	0.03	0.03	0.03	0.03	0.03	0.03	0.03	0.03	0.03	0.03	0.03	0.03	0.03	0.559135	0.70333	0.03	0.03	0.03	0.747532	0.834777	0.0872602	0.0586301	-4.09221	0.343799	-1.54036	1127	949	316.333														CAMPEP_0199421954-CAMNT_0045236299	22			Ceratium fusus, Strain PA161109
contig_1217177_295_2096_+	0.03	0.03	0.03	0.03	0.03	0.03	0.03	0.03	0.03	0.03	0.03	0.03	0.03	0.03	0.03	0.03	0.169331	0.17184	0.03	0.03	0.03	0.745614	0.834777	0.0433891	0.0366945	-4.76829	0.691418	-0.53237	2246	1802	600.667														CAMPEP_0200829208-CAMNT_0046996705	59			Karlodinium micrum, Strain CCMP2283
contig_1221120_1_1056_+	0.03	0.03	0.03	0.03	0.03	0.03	0.03	0.03	0.03	0.03	0.03	0.03	0.03	0.03	0.03	0.03	0.14888	0.151021	0.248917	0.03	0.03	0.698211	0.834777	0.0518485	0.0409242	-4.6109	0.578609	-0.789339	2338	1056	352														gi114769138-NZ_AATR01000001	56	ABC transporter, substrate-binding protein, family 5	CAM_CRCL_22694	Rhodobacterales bacterium HTCC2255
contig_1221276_1_521_+	0.03	0.03	0.03	0.03	0.03	0.03	0.03	0.03	0.03	0.03	0.03	0.03	0.03	0.03	0.03	0.03	0.511909	0.03	0.03	0.03	0.03	0.823063	0.834777	0.052948	0.041474	-4.59165	0.566593	-0.819614	664	521	173.667								0018298||0030076						CAMPEP_0186862974-CAMNT_0029761419	61	PF02429.10: Peridinin-chlorophyll A binding protein		Azadinium spinosum 3D9
contig_1221639_114_1016_+	0.03	0.03	0.03	0.03	0.03	0.03	0.03	0.03	0.458839	0.865563	0.455566	0.03	0.03	0.03	0.03	0.03	0.03	0.03	0.03	0.03	0.03	0.701727	0.834777	0.110475	0.0702373	-3.83162	0.271555	-1.88068	1233	903	301	ttu:TERTU_1237	flagellin; K02406 flagellin	ttu02020||ttu02040	K02406	flagellin	Two-component system || Flagellar assembly || Plant-pathogen interaction || Salmonella infection || Legionellosis		0005198||0009288||0071973	C5BRS9					gi497261702-NZ_AEIG01000048	66	Flagellar biosynthesis protein fliC		gamma proteobacterium IMCC3088
contig_1221827_1_915_-	0.03	0.03	0.03	0.03	0.03	0.03	0.03	0.03	0.03	0.03	0.03	0.03	0.03	0.03	0.03	0.03	0.304398	0.03	0.03	0.03	0.03	0.823063	0.834777	0.0430666	0.0365333	-4.77464	0.696596	-0.521606	2397	915	305														JCVI_PEP_metagenomic.orf.1126664246076.1-SAR324	48		CAM_CRCL_28084	SAR324 cluster bacterium JCVI-SC AAA005
contig_1222342_77_767_-	0.03	0.03	0.03	0.03	0.03	0.03	0.03	0.03	0.03	0.03	0.03	0.03	0.03	0.03	0.03	0.03	0.211675	0.214946	0.03	0.03	0.03	0.745614	0.834777	0.0474581	0.0387291	-4.69044	0.632136	-0.661693	767	691	230.333														CAMPEP_0190376208-CAMNT_0034126189	42	TIGR02168: SMC_prok_B: chromosome segregation protein SMC		Oxyrrhis marina
contig_1222473_1117_1824_+	0.03	0.03	0.03	0.03	0.03	0.03	0.03	0.03	0.03	0.03	0.03	0.03	0.03	0.03	0.03	0.03	0.384625	0.391011	0.35652	0.03	0.03	0.683416	0.834777	0.0796265	0.0548132	-4.18933	0.376759	-1.40829	2329	708	236								0000139||0005351||0008643||0016021						CAMPEP_0200868238-CAMNT_0047045889	73	PF04142.10: Nucleotide-sugar transporter		Karlodinium micrum, Strain CCMP2283
contig_122335_77_480_-	0.03	0.03	0.03	0.03	0.965086	0.03	0.03	0.03	0.03	0.03	0.03	0.03	0.03	0.03	0.03	0.03	0.03	0.03	0.03	0.03	0.03	0.823063	0.834777	0.0745279	0.0522639	-4.25804	0.402534	-1.31282	480	404	134.667								5509		KOG0030	Myosin essential light chain, EF-Hand protein superfamily	Cytoskeleton	CELLULAR PROCESSES AND SIGNALING	100206886-hmg447	62	myosin light chain 6B-like		Hydra magnipapillata
contig_1225906_1_989_+	0.03	0.03	0.03	0.263631	0.220988	0.03	0.03	0.03	0.03	0.03	0.03	0.03	0.03	0.03	0.03	0.03	0.03	0.03	0.03	0.03	0.03	0.746961	0.834777	0.05022	0.04011	-4.63989	0.597372	-0.743299	1247	989	329.667								0004019||0005525||0006164||0009152						amad1_02670-NC_019393	92	adenylosuccinate synthetase		Alteromonas macleodii AltDE1
contig_1225959_21_986_-	0.03	0.03	0.03	0.03	0.03	0.03	0.03	0.03	0.03	0.03	0.03	0.03	0.03	0.03	0.03	0.03	0.03	0.294592	0.03	0.03	0.03	0.823063	0.834777	0.0425996	0.0362998	-4.78389	0.704232	-0.505878	2368	966	322														CAMPEP_0200766594-CAMNT_0046919165	64			Karlodinium micrum, Strain CCMP2283
contig_1225971_1_574_-	0.03	0.03	0.03	0.03	0.03	0.03	0.03	0.03	0.03	0.03	0.03	0.03	0.03	0.03	0.03	0.03	0.03	0.252645	0.03	0.03	0.03	0.823063	0.834777	0.0406021	0.0353011	-4.82414	0.738878	-0.436593	1677	574	191.333														CAMPEP_0200861264-CAMNT_0047038771	62	PF01822.14: WSC domain		Karlodinium micrum, Strain CCMP2283
contig_1226106_58_990_-	0.03	0.03	0.03	0.03	0.03	0.411296	0.267613	0.03	0.03	0.434348	0.03	0.2707	0.03	0.247071	0.522888	0.516743	0.03	0.166975	0.03	0.03	0.03	0.481222	0.834777	0.153697	0.0918485	-3.4446	0.195189	-2.35705	2464	933	311	rba:RB1798	moxR; methanol dehydrogenase regulator (MoxR)-like protein; K03924 MoxR-like ATPase [EC:3.6.3.-]		K03924	MoxR-like ATPase [EC:3.6.3.-]			0005524||0016887	Q7UWT7					Psta_2320-NC_013720	74	ATPase associated with various cellular activities AAA_3	CAM_CRCL_32391901	Pirellula staleyi DSM 6068
contig_1226491_1018_1773_+	0.03	0.03	0.03	0.03	0.03	0.03	0.03	0.03	0.03	0.03	0.03	0.03	0.03	0.03	0.03	0.03	0.03	0.199045	0.03	0.03	0.03	0.823063	0.834777	0.0380498	0.0340249	-4.87727	0.788441	-0.342925	1821	756	252														CAMPEP_0200827930-CAMNT_0046995053	50			Karlodinium micrum, Strain CCMP2283
contig_1226632_1_1126_+	0.03	0.03	0.03	0.03	0.03	0.03	0.03	0.03	0.03	0.03	0.03	0.03	0.246469	0.03	0.03	0.03	0.03	0.483989	0.03	0.03	0.03	0.761097	0.834777	0.0619266	0.0459633	-4.44337	0.484445	-1.0456	1612	1126	375.333	pti:PHATRDRAFT_54465	ISIP2A; iron starvation induced protein							B7FYL2					CAMPEP_0189001852-CAMNT_0032504121	47	PF07692.6: Low iron-inducible periplasmic protein PF05369.7: Monomethylamine methyltransferase MtmB		Karenia brevis CCMP2229
contig_1226632_1225_1611_+	0.03	0.03	0.03	0.03	0.03	0.03	0.03	0.03	0.03	0.03	0.03	0.03	0.03	0.03	0.03	0.03	0.678771	0.690455	0.03	0.03	0.03	0.745614	0.834777	0.0923441	0.061172	-4.03098	0.324872	-1.62206	1612	387	129	pti:PHATRDRAFT_54465	ISIP2A; iron starvation induced protein							B7FYL2					CAMPEP_0189492654-CAMNT_0033129787	59	PF07692.6: Low iron-inducible periplasmic protein		Karenia brevis Wilson
contig_1226951_150_986_-	0.03	0.03	0.03	0.03	0.03	0.03	0.03	0.03	0.03	0.03	0.03	0.03	0.03	0.03	0.03	0.03	0.329969	0.03	0.03	0.03	0.03	0.823063	0.834777	0.0442843	0.0371421	-4.7508	0.677442	-0.561831	1191	837	279	tps:THAPSDRAFT_6139	hypothetical protein							B8C5N8					contig_25765_241_1074-pg1871	73		CAM_CRCL_12247	Phaeocystis antarctica, Strain CCMP1374
contig_1229795_1051_1906_+	0.03	0.03	0.03	0.03	0.03	0.03	0.03	0.03	0.03	0.03	0.03	0.03	0.03	0.03	0.03	0.03	0.176656	0.179297	0.03	0.03	0.03	0.745614	0.834777	0.044093	0.0370465	-4.75452	0.680381	-0.555586	1907	856	285.333														CAMPEP_0200825202-CAMNT_0046991163	63			Karlodinium micrum, Strain CCMP2283
contig_1231373_1_1079_+	0.03	0.03	0.03	0.03	0.03	0.03	0.03	0.03	0.03	0.03	0.03	0.03	0.03	0.03	0.03	0.03	0.03	0.03	0.03	0.291295	0.03	0.823063	0.834777	0.0424426	0.0362213	-4.78702	0.706836	-0.500552	1170	1079	359.667														gi149175936-NZ_ABCE01000015	36	Protein of unknown function (DUF1559)	CAM_CRCL_4001241	Planctomyces maris DSM 8797
contig_1235438_1_848_-	1.07555	2.38647	0.03	0.03	0.03	0.03	0.03	0.03	0.03	0.03	0.03	0.03	0.03	0.03	0.03	0.03	0.03	0.03	0.03	0.03	1.1368	0.119718	0.834777	0.244706	0.690751	-0.533762	4.64556	2.21585	870	848	282.667	cyt:cce_4247	clpC1; ATP-dependent Clp protease regulatory subunit; K03696 ATP-dependent Clp protease ATP-binding subunit ClpC		K03696	ATP-dependent Clp protease ATP-binding subunit ClpC			0005524||0019538	B1WSL6					gi67920889-NZ_AADV02000002	92	UvrB/UvrC protein:AAA ATPase central region:Clp N terminal:Clp N terminal	CAM_CRCL_4006083	Crocosphaera watsonii WH 8501
contig_1235444_1_725_-	0.03	0.03	0.03	0.03	0.03	0.03	0.03	0.03	0.03	0.03	0.03	0.03	0.03	0.03	0.03	0.03	0.376309	0.558819	0.03	0.41888	0.03	0.688913	0.834777	0.0901909	0.0600954	-4.0566	0.332628	-1.58802	725	725	241.667	pfv:Psefu_3095	flagellin domain protein; K02406 flagellin	pfv02040||pfv02020	K02406	flagellin	Two-component system || Flagellar assembly || Plant-pathogen interaction || Salmonella infection || Legionellosis		0005198||0009288||0071973						Psefu_3095-NC_015556	46	flagellin domain protein; K02406 flagellin	CAM_CRCL_34374	Pseudomonas fulva 12-X
contig_1236337_1983_2957_-	0.03	0.03	0.03	0.03	0.03	0.03	0.03	0.03	0.03	0.03	0.03	0.03	0.03	0.03	0.03	0.03	0.03	0.29215	0.741312	0.03	0.03	0.770354	0.834777	0.0763553	0.0531776	-4.23304	0.3929	-1.34777	3454	975	325								0004872||0006810||0016020						gi88858231-NZ_AAOH01000002	72	TonB-dependent receptor	CAM_CRCL_32661726	Pseudoalteromonas tunicata D2
contig_1236337_3268_3451_-	0.03	0.03	0.03	0.03	0.03	0.03	0.03	0.03	0.03	0.03	0.03	0.03	0.03	0.03	0.03	0.03	0.03	0.724554	0.03	0.03	0.03	0.823063	0.834777	0.063074	0.046537	-4.42548	0.475632	-1.07208	3454	184	61.3333	pha:PSHAa0536	hypothetical protein							Q3ILE9					PSHAa0536-NC_007481	81	hypothetical protein	CAM_CRCL_4253111	Pseudoalteromonas haloplanktis TAC125
contig_1236337_74_1905_-	0.03	0.03	0.03	0.03	0.03	0.03	0.03	0.03	0.03	0.03	0.03	0.03	0.03	0.03	0.03	0.03	0.03	0.0997587	0.03	0.03	0.03	0.823063	0.834777	0.0333218	0.0316609	-4.98115	0.90031	-0.151506	3454	1832	610.667								0004872||0006810||0016020						gi88858231-NZ_AAOH01000002	72	TonB-dependent receptor	CAM_CRCL_32661726	Pseudoalteromonas tunicata D2
contig_1236894_1156_2079_+	0.03	0.03	0.03	0.03	0.03	0.03	0.03	0.03	0.03	0.03	0.03	0.03	0.03	0.03	0.03	0.03	0.03	0.168309	0.280191	0.03	0.03	0.756163	0.834777	0.0485	0.03925	-4.67116	0.618557	-0.693023	2258	924	308	sch:Sphch_3008	TonB-dependent receptor												Sphch_3008-NC_015594	33	TonB-dependent receptor	CAM_CRCL_4008773	Sphingobium chlorophenolicum L-1
contig_1237617_1_919_+	0.03	0.03	0.03	0.03	0.03	0.03	0.03	0.03	0.03	0.03	0.03	0.03	0.03	0.03	0.03	0.03	0.03	0.308124	0.281552	0.336787	0.03	0.684229	0.834777	0.0698316	0.0499158	-4.32436	0.429605	-1.21892	938	919	306.333														AZOBR_190005-NC_016617	25	conserved exported protein of unknown function		Azospirillum brasilense Sp245
contig_1237799_1_959_-	0.03	0.03	0.03	0.03	0.03	0.03	0.03	0.03	0.03	0.03	0.03	0.03	0.03	0.03	0.03	0.03	0.03	0.03	0.03	0.176996	0.03	0.823063	0.834777	0.0369998	0.0334999	-4.8997	0.810815	-0.302555	1337	959	319.667														gi83859854-NZ_AAMQ01000003	78	hypothetical protein		Oceanicaulis alexandrii HTCC2633
contig_1238113_235_642_-	0.03	0.03	0.03	0.03	0.03	0.03	0.03	0.03	0.03	0.03	0.03	0.03	0.627412	1.02278	0.405706	0.401023	4.33765	1.90938	5.12948	0.03	0.03	0.641939	0.834777	0.678735	0.354367	-1.49668	0.0441999	-4.49981	1020	408	136	vcn:VOLCADRAFT_79339	hypothetical protein; K02638 plastocyanin						0005507||0009055||0015979||0055114						CAMPEP_0182610638-CAMNT_0024829865	74	TIGR02656: cyanin_plasto: plastocyanin PF00127.15: Copper binding proteins, plastocyanin/azurin family PF13473.1: Cupredoxin-like domain		Picochlorum RCC944
contig_1238426_530_2092_+	0.03	0.03	0.03	0.03	0.03	0.03	0.03	0.03	0.03	0.03	0.03	0.03	0.03	0.03	0.226146	0.12685	0.03	0.03	0.03	0.03	0.03	0.759891	0.834777	0.0439522	0.0369761	-4.75726	0.682559	-0.550973	2094	1563	521	zga:zobellia_1380	hypothetical protein												A257C11DRAFT_00876-A257C11DRAFT_redundant_region_4.163	62	Uncharacterized protein conserved in bacteria		BRC1 bacterium SCGC AAA257-C11
contig_1243483_1_509_-	0.03	0.03	0.03	0.03	0.03	0.03	0.03	0.03	0.03	0.03	0.03	0.03	0.03	0.03	0.03	0.03	0.52327	0.281077	0.03	0.03	0.03	0.758859	0.834777	0.0654451	0.0477225	-4.38919	0.4584	-1.12532	1188	509	169.667								0003676||0005524		KOG0326	ATP-dependent RNA helicase	RNA processing and modification	INFORMATION STORAGE AND PROCESSING	CAMPEP_0188912996-CAMNT_0032397173	82	TIGR04121: DEXH_lig_assoc: DEXH box helicase, DNA ligase-associated PF00270.24: DEAD/DEAH box helicase PF00271.26: Helicase conserved C-terminal domain		Karenia brevis CCMP2229
contig_1247067_69_905_-	0.03	0.03	0.03	0.306059	0.481344	0.03	0.03	0.03	0.03	0.03	0.03	0.298308	0.03	0.03	0.03	0.03	0.03	0.488057	0.03	0.03	0.03	0.640363	0.834777	0.099227	0.0646135	-3.95202	0.302337	-1.72577	2182	837	279														CAMPEP_0200823792-CAMNT_0046989143	77			Karlodinium micrum, Strain CCMP2283
contig_1247308_18_1807_+	0.03	0.03	0.03	0.03	0.03	0.03	0.03	0.03	0.03	0.03	0.03	0.03	0.03	0.03	0.03	0.03	0.100132	0.101396	0.03	0.03	0.03	0.745614	0.834777	0.0367394	0.0333697	-4.90532	0.816561	-0.292367	1959	1790	596.667														CAMPEP_0200789778-CAMNT_0046946699	62			Karlodinium micrum, Strain CCMP2283
contig_1247611_978_1958_+	0.03	0.03	0.03	0.03	0.03	0.57396	0.03	0.03	0.03	0.03	0.03	0.03	0.03	0.03	0.03	0.03	0.03	0.03	0.03	0.03	0.03	0.823063	0.834777	0.0559028	0.0429514	-4.54115	0.536645	-0.897959	3657	981	327	vch:VC1325 || vco:VC0395_A0942 || vcm:VCM66_1280 || vcj:VCD_003012	galactoside ABC transporter, periplasmic D-galactose/D-glucose-binding protein; K10540 methyl-galactoside transport system substrate-binding protein || mglB; D-galactose/D-glucose ABC transporter, periplasmic D-galactose/D-glucose-binding protein; K10540 methyl-galactoside transport system substrate-binding protein || mglB; galactoside ABC transporter, periplasmic D-galactose/D-glucose-binding pr…	vco02010||vco02030	K10540	methyl-galactoside transport system substrate-binding protein	ABC transporters || Bacterial chemotaxis			A5F8J7					VFA_001392-NZ_ACZP01000013	85	galactose/methyl galactoside ABC transport system D-galactose-binding MglB	CAM_CRCL_4000585	Vibrio furnissii CIP 102972
contig_1247637_3047_3928_+	0.03	0.03	0.03	0.03	0.03	0.03	0.03	0.03	0.03	0.03	0.03	0.03	0.03	0.03	0.03	0.201629	0.172332	0.174896	0.03	0.03	0.03	0.684395	0.834777	0.0518504	0.0409252	-4.61087	0.578588	-0.789391	4275	882	294	bxe:Bxe_A0674	sucC; succinyl-CoA synthetase subunit beta (EC:6.2.1.5); K01903 succinyl-CoA synthetase beta subunit [EC:6.2.1.5]	bxe01120||bxe00640||bxe01100||bxe00660||bxe00020||bxe01110	K01903	succinyl-CoA synthetase beta subunit [EC:6.2.1.5]	Citrate cycle (TCA cycle) || Propanoate metabolism || C5-Branched dibasic acid metabolism || Carbon fixation pathways in prokaryotes || Carbon metabolism	6.2.1.5	0003824||0004774||0004775||0004776||0006099||0008152	Q13UH9					gi149928247-NZ_ABCT01000021	99	succinate-CoA ligase, beta subunit	CAM_CRCL_564	Limnobacter MED105
contig_1247899_243_1133_+	0.03	0.03	0.03	0.03	0.241995	0.03	0.03	0.03	0.03	0.03	0.03	0.03	0.03	0.03	0.03	0.03	0.03	0.03	0.03	0.03	0.03	0.823063	0.834777	0.040095	0.0350475	-4.83454	0.748223	-0.418459	1570	891	297														SSIL_1838-NC_018065	30	dipeptide ABC transporter substrate-binding protein		Solibacillus silvestris StLB046
contig_1248190_3062_3334_+	0.03	0.03	0.03	0.876378	0.03	0.03	0.03	0.03	0.03	0.03	0.03	0.03	0.03	0.03	0.03	1.13899	0.03	0.03	0.03	0.03	0.03	0.748016	0.834777	0.123113	0.0765564	-3.70733	0.243679	-2.03695	4870	273	91	lan:Lacal_2149	histone family protein DNA-binding protein; K03530 DNA-binding protein HU-beta		K03530	DNA-binding protein HU-beta			3677						FBALC1_06958-NZ_ABHI01000003	86	keto-hydroxyglutarate-aldolase/keto-deoxy- phosphogluconate aldolase	CAM_CRCL_92	Flavobacteriales bacterium ALC-1
contig_1248207_320_610_-	0.03	0.03	0.03	0.03	0.03	0.03	0.03	0.03	0.03	0.03	0.03	0.03	0.03	0.03	0.03	0.03	0.03	0.908336	0.03	0.03	0.03	0.823063	0.834777	0.0718255	0.0509128	-4.29583	0.417679	-1.25953	1623	291	97	psm:PSM_A2121	hupB; DNA-binding protein; K03530 DNA-binding protein HU-beta		K03530	DNA-binding protein HU-beta			3677	E6RNP6					gi495386332-NZ_BADU01000063	74	transcriptional regulator	CAM_CRCL_92	Pseudoalteromonas BSi20311
contig_1248565_225_1015_+	0.03	0.03	0.03	0.03	0.507591	0.03	0.310269	0.03	0.03	0.03	0.03	0.03	0.03	0.542078	0.03	0.412749	0.188707	0.514695	0.03	0.386432	0.03	0.508795	0.834777	0.156311	0.0931553	-3.42422	0.191926	-2.38138	1016	791	263.667	gau:GAU_2404	putative outer membrane protein						0004872||0006810||0016020	C1AB40					Rmar_0915-NC_013502	42	TonB-dependent receptor plug	CAM_CRCL_70121	Rhodothermus marinus DSM 4252
contig_1248597_1_860_+	3.12289	2.35359	3.92969	0.03	0.03	0.03	0.03	0.03	0.03	0.03	0.03	0.03	0.03	0.03	0.03	0.03	0.321947	0.03	0.03	0.03	0.03	0.68013	0.834777	0.487529	0.258765	-1.95029	0.0615347	-4.02245	2098	860	286.667	tps:THAPSDRAFT_270092	hypothetical protein							B8CFP9					CAMPEP_0119299006-CAMNT_0007300281	84	PF00504.16: Chlorophyll A-B binding protein		Scyphosphaera apsteinii, Strain RCC1455
contig_1248640_333_975_+	0.03	0.03	0.03	0.03	0.03	0.03	0.03	0.03	0.03	0.03	0.03	0.03	0.03	0.03	0.03	0.265423	0.03	0.03	0.03	0.03	0.03	0.823063	0.834777	0.0412106	0.0356053	-4.81176	0.727967	-0.458054	975	643	214.333														gi126663358-NZ_AAXX01000002	80	hypothetical protein	CAM_CRCL_5120	Flavobacteria bacterium BAL38
contig_1248724_1_878_+	0.03	0.03	0.03	0.03	0.03	0.03	0.03	0.03	0.03	0.03	0.03	0.797336	0.585226	0.491337	0.379176	0.202411	0.458943	0.466667	0.293299	0.351114	0.03	0.442165	0.834777	0.208834	0.119417	-3.06592	0.143655	-2.79932	2225	878	292.667	tps:THAPS_7122	sig2; sig2-like protein							B5YNE7					CAMPEP_0195521524-CAMNT_0040651099	57	PF07974.8: EGF-like domain		Stephanopyxis turris, Strain CCMP 815
contig_1248752_111_785_-	0.03	0.03	0.03	0.03	0.03	0.03	0.03	0.03	0.03	0.03	0.03	0.03	0.03	0.03	0.03	0.03	0.215981	0.03	0.03	0.03	0.03	0.823063	0.834777	0.0388562	0.0344281	-4.86027	0.772077	-0.373184	1199	675	225	pmm:PMM0750	ABC transporter, ATP-binding component; K02003		K02003	putative ABC transport system ATP-binding protein			0005524||0006810||0016887||0042626||0043190	Q7V1V3					PMM0750-NC_005072	82	ABC transporter, ATP-binding component; K02003	CAM_CRCL_32413698	Prochlorococcus marinus subsp. pastoris str. CCMP1986
contig_1248752_111_785_-	0.03	0.03	0.03	0.03	0.03	0.03	0.03	0.03	0.03	0.03	0.03	0.03	0.03	0.03	0.03	0.03	0.215981	0.03	0.03	0.03	0.03	0.823063	0.834777	0.0388562	0.0344281	-4.86027	0.772077	-0.373184	1199	675	225	pmm:PMM0750	ABC transporter, ATP-binding component; K02003		K02003	putative ABC transport system ATP-binding protein			0005524||0006810||0016887||0042626||0043190	Q7V1V3					PMM0750-NC_005072	82	ABC transporter, ATP-binding component; K02003	CAM_CRCL_32413698	Prochlorococcus marinus subsp. pastoris str. CCMP1986
contig_1248837_1_1057_+	0.03	0.03	0.03	0.248601	0.208701	0.03	0.03	0.03	0.03	0.03	0.03	0.03	0.03	0.03	0.03	0.03	0.03	0.03	0.03	0.03	0.03	0.746961	0.834777	0.0489192	0.0394596	-4.66348	0.613257	-0.705437	1058	1057	352.333	apb:SAR116_1199	family 1 extracellular solute-binding protein (EC:4.99.1.-); K02027 multiple sugar transport system substrate-binding protein		K02027	multiple sugar transport system substrate-binding protein			0005215||0006810	D5BT45					B071DRAFT_01456-B071DRAFT_scaffold_70.71	58	ABC-type sugar transport system, periplasmic component		Spirochaeta alkalica DSM 8900
contig_1249373_1_745_-	0.03	0.03	0.03	0.03	0.03	0.03	0.03	0.03	0.03	0.03	0.03	0.03	0.03	0.03	0.03	0.03	0.03	0.201541	0.03	0.03	0.03	0.823063	0.834777	0.0381686	0.0340843	-4.87475	0.785986	-0.347424	1507	745	248.333														CAMPEP_0200829264-CAMNT_0046996791	82			Karlodinium micrum, Strain CCMP2283
contig_1249504_273_1004_+	0.03	0.03	0.03	0.03	0.288043	0.272998	0.03	0.03	0.03	0.03	0.03	0.03	0.03	0.306676	0.23941	0.857198	0.201499	1.25211	0.345815	2.72613	0.03	0.630887	0.834777	0.326185	0.178092	-2.4893	0.0919725	-3.44265	1354	732	244	bra:BRADO0974	branched chain amino acid ABC transporter periplasmic-binding protein							A4YLW3					gi159182385-ABHC01000001	71	hypothetical protein	CAM_CRCL_4000194	alpha proteobacterium BAL199
contig_1249817_1_1009_+	4.4236	0.03	1.69191	0.03	0.03	0.03	0.03	0.03	0.03	0.03	0.03	0.03	0.03	0.23072	0.181921	0.330054	0.03	0.03	0.259114	0.03	0.03	0.734853	0.834777	0.360349	0.195174	-2.35716	0.0832527	-3.58636	2848	1009	336.333														gi61806003-NC_006883	71	20 portal vertex protein	CAM_CRCL_32827896	Prochlorococcus phage P-SSM2
contig_1250047_1_1276_+	0.03	0.03	0.03	0.03	0.03	0.03	0.03	0.03	0.03	0.03	0.03	0.03	0.03	0.18872	0.03	0.03	0.128383	0.130155	2.56642	0.03	0.03	0.797876	0.834777	0.167794	0.098897	-3.33793	0.178791	-2.48366	1353	1276	425.333	pti:PHATRDRAFT_54465	ISIP2A; iron starvation induced protein							B7FYL2					CAMPEP_0119256670-CAMNT_0007256015	65	TIGR03921: T7SS_mycosin: type VII secretion-associated serine protease mycosin PF00082.17: Subtilase family PF07692.6: Low iron-inducible periplasmic protein		Pelagomonas calceolata RCC969
contig_1250554_1_982_-	0.03	0.03	0.03	0.03	0.03	0.03	0.03	0.03	0.03	0.03	0.03	0.03	0.03	0.03	0.03	0.03	0.157838	0.03	0.03	0.03	0.03	0.823063	0.834777	0.0360875	0.0330438	-4.91948	0.831312	-0.266538	1918	982	327.333	sil:SPO0519	glutamate/glutamine/aspartate/asparagine ABC transporter, periplasmic substrate-binding protein; K09969 general L-amino acid transport system substrate-binding protein	sil02010	K09969	general L-amino acid transport system substrate-binding protein	ABC transporters			Q5LW24					TR2A62_3109-NZ_GG697169	84	glutamate/glutamine/aspartate/asparagine-binding protein bztAprecursor	CAM_CRCL_3107	Thalassiobium R2A62
contig_1251730_1_960_+	0.03	0.03	0.03	0.270689	0.226758	0.215286	0.26093	0.03	0.433377	0.422976	0.430298	0.03	0.5378	0.451931	0.189675	0.187685	0.03	0.03	0.03	0.03	0.03	0.364712	0.834777	0.187019	0.10851	-3.20411	0.160411	-2.64015	1024	960	320								0005198||0019012||0019068						Asulf_01513-NC_021169	36	major capsid protein, HK97 family		Archaeoglobus sulfaticallidus PM70-1
contig_1252314_1_638_+	0.03	0.03	0.03	1.11649	0.03	0.03	0.03	0.03	0.03	0.03	0.03	0.03	0.03	0.03	0.03	0.03	0.03	0.03	0.03	0.03	0.03	0.823063	0.834777	0.0817378	0.0558689	-4.16181	0.367027	-1.44604	664	638	212.667								0018298||0030076						CAMPEP_0186862974-CAMNT_0029761419	56	PF02429.10: Peridinin-chlorophyll A binding protein		Azadinium spinosum 3D9
contig_1252604_1_496_+	0.03	0.03	0.03	0.495849	0.410821	1.10586	0.923922	0.03	0.810729	0.03	0.80477	0.482769	0.521419	0.846641	0.339049	0.335196	0.789297	0.545314	1.42824	0.882634	0.03	0.219266	0.834777	0.519167	0.274584	-1.86468	0.0577849	-4.11316	565	496	165.333														gi89069126-NZ_AAOT01000013	54	putAtive periplasmic solute-binding protein of a sugar uptake ABC transporter system	CAM_CRCL_32495708	Oceanicola granulosus HTCC2516
contig_1252800_462_995_-	0.03	0.03	0.03	0.03	0.03	0.03	0.03	0.03	0.03	0.03	0.03	0.03	0.03	0.03	0.03	0.313478	0.03	0.03	0.03	0.03	0.03	0.823063	0.834777	0.0434989	0.0367495	-4.76613	0.689672	-0.536018	1197	534	178	nde:NIDE3278	putative nitrate reductase subunit gamma (EC:1.7.99.4)						20037						NIDE3278-NC_014355	39	putative nitrate reductase subunit gamma (EC:1.7.99.4)	CAM_CRCL_4069661	Nitrospira defluvii
contig_1253347_1053_1823_+	0.03	0.03	0.03	0.03	0.03	0.03	0.605078	0.03	0.03	0.519308	0.03	0.03	0.03	0.03	0.03	0.619016	0.03	0.03	0.03	0.03	0.03	0.684204	0.834777	0.108733	0.0693667	-3.84961	0.275904	-1.85776	1886	771	257	rsh:Rsph17029_4063 || rsk:RSKD131_3509	ABC spermidine/putrescine transporter, periplasmic binding protein; K02055 putative spermidine/putrescine transport system substrate-binding protein || ABC spermidine/putrescine transporter, periplasmic binding protein precursor; K02055 putative spermidine/putrescine transport system substrate-binding protein		K02055	putative spermidine/putrescine transport system substrate-binding protein				B9KTJ1					Lepto7375DRAFT_2023-Lepto7375DRAFT_LPA.5	57	hypothetical protein		Leptolyngbya PCC 7375
contig_1253540_1_946_-	0.03	0.03	0.03	0.03	0.03	0.03	0.03	0.03	0.03	0.428792	0.03	0.267393	0.03	0.03	0.03	0.190018	0.03	0.03	0.03	0.328031	0.03	0.64755	0.834777	0.0821064	0.0560532	-4.15706	0.36538	-1.45253	946	946	315.333	ote:Oter_2054	groEL; chaperonin GroEL; K04077 chaperonin GroEL	ote03018	K04077	chaperonin GroEL	RNA degradation || Longevity regulating pathway - worm || Type I diabetes mellitus || Legionellosis || Tuberculosis		0005524||0044267	B1ZMQ9					gi223936010-NZ_ABOX02000008	72	chaperonin GroEL	CAM_CRCL_36	Pedosphaera parvula Ellin514
contig_1253576_1_1016_+	0.03	0.03	0.03	0.03	0.215913	0.03	0.03	0.03	0.03	0.03	0.03	0.03	0.03	0.03	0.03	0.03	0.03	0.03	0.03	0.03	0.03	0.823063	0.834777	0.038853	0.0344265	-4.86034	0.772141	-0.373063	1578	1016	338.667	amc:MADE_1015975	BipA protein; K06207 GTP-binding protein		K06207	GTP-binding protein			0003924||0005525						gi521323951-CP004846	92	BipA protein	CAM_CRCL_32343080	Alteromonas macleodii str. 'English Channel 615'
contig_1253635_982_1764_-	0.03	0.03	0.03	0.03	0.271235	0.03	0.879397	0.03	0.03	0.03	0.03	0.890435	1.27518	0.54731	0.421541	0.416659	0.03	0.03	0.03	1.29026	0.03	0.511393	0.834777	0.303906	0.166953	-2.58249	0.0987149	-3.34059	2065	783	261														or3768-POR4E_contig00324standard	39	Leucine Rich Repeat.		Poribacteria WGA-4E
contig_1254007_1_481_-	0.03	0.03	0.03	0.03	0.03	0.03	0.03	0.03	1.64015	0.814318	0.03	0.03	0.03	0.03	0.03	0.344713	0.03	0.03	0.03	0.03	0.03	0.731011	0.834777	0.159009	0.0945044	-3.40348	0.188669	-2.40607	667	481	160.333										KOG2408	Peroxidase/oxygenase	General function prediction only	POORLY CHARACTERIZED	PCA10_40580-NC_021499	57	protein		Pseudomonas resinovorans NBRC 106553
contig_1254035_86_1262_+	0.03	0.03	0.03	0.03	0.190482	0.03	0.03	0.03	0.03	0.03	0.03	0.03	0.03	0.03	0.03	0.03	0.136659	0.03	0.03	0.03	0.03	0.75094	0.834777	0.042721	0.0363605	-4.78148	0.702231	-0.509982	1263	1177	392.333	hch:HCH_04613	groEL; chaperonin GroEL; K04077 chaperonin GroEL	hch03018	K04077	chaperonin GroEL	RNA degradation || Longevity regulating pathway - worm || Type I diabetes mellitus || Legionellosis || Tuberculosis		0005515||0005524||0006457||0016887||0044267	Q2SDG0					HCH_04613-NC_007645	80	groEL; chaperonin GroEL; K04077 chaperonin GroEL	CAM_CRCL_32875177	Hahella chejuensis KCTC 2396
contig_1254079_1_630_-	0.03	0.03	0.03	0.03	0.03	0.03	0.03	0.03	0.03	0.03	0.03	0.03	0.03	0.03	0.03	0.03	0.03	0.232854	0.03	1.1488	0.03	0.793149	0.834777	0.0929359	0.061468	-4.02402	0.322803	-1.63127	902	630	210	cyp:PCC8801_0420	carboxymethylenebutenolidase (EC:3.1.1.45); K01061 carboxymethylenebutenolidase [EC:3.1.1.45]	cyp00364||cyp00623||cyp00361||cyp01120||cyp01100	K01061	carboxymethylenebutenolidase [EC:3.1.1.45]	Chlorocyclohexane and chlorobenzene degradation || Fluorobenzoate degradation || Toluene degradation	3.1.1.45	0008806||0016787	B7JUD7					PCC8801_0420-NC_011726	35	carboxymethylenebutenolidase (EC:3.1.1.45); K01061 carboxymethylenebutenolidase [EC:3.1.1.45]	CAM_CRCL_14766203	Cyanothece PCC 8801
contig_1254254_1_658_-	0.03	0.03	0.03	0.03	0.317063	0.570653	0.703838	0.03	0.03	0.03	0.03	0.371297	0.03	0.03	0.262961	0.260057	0.03	0.03	0.03	1.95815	0.03	0.640596	0.834777	0.23162	0.13081	-2.93446	0.129523	-2.94872	658	658	219.333	dan:Dana_GF12744	GF12744 gene product from transcript GF12744-RA							B3MIS0					or3758-POR4E_contig00324standard	36	hypothetical protein		Poribacteria WGA-4E
contig_1254721_1_249_+	0.03	0.03	0.03	0.957957	2.30575	1.45871	2.701	0.03	0.03	0.03	0.03	1.8338	1.00889	0.03	0.03	0.03	0.03	1.05649	0.03	0.59614	0.03	0.500454	0.834777	0.586131	0.308065	-1.69869	0.0511831	-4.28819	249	249	83														gi498193603-NZ_AFHZ01000074	67	sugar ABC transporter substrate-binding protein		gamma proteobacterium SCGC AAA001-B15
contig_1254817_1_643_-	0.03	0.03	0.03	0.03	0.03	0.03	0.03	0.03	0.03	0.03	0.627646	0.03	0.03	0.03	0.03	0.03	0.03	0.03	0.03	0.03	0.03	0.823063	0.834777	0.0584593	0.0442297	-4.49884	0.513177	-0.96247	1199	643	214.333	oan:Oant_2475	extracellular solute-binding protein							A6X1T4					gi490219851-NZ_GL882809	40	peptide ABC transporter substrate-binding protein		Klebsiella MS 92-3
contig_1254883_1_374_-	0.03	0.03	0.03	0.03	0.03	0.03	0.03	0.03	0.03	0.03	0.03	0.03	0.03	0.03	0.03	0.03	0.03	0.03	0.03	0.406922	0.03	0.823063	0.834777	0.0479487	0.0389743	-4.68133	0.625669	-0.676528	400	374	124.667								0003677||0006355						Thivi_4084-NC_018012	45	RNA polymerase sigma-70 subunit RpoD		Thiocystis violascens DSM 198
contig_1255108_1_780_-	0.03	0.03	0.03	0.03	0.03	0.03	0.03	0.03	0.03	0.03	0.03	0.03	0.03	0.03	0.03	0.03	0.190945	0.193844	0.03	0.03	0.03	0.745614	0.834777	0.0454661	0.0377331	-4.72803	0.659832	-0.59983	780	780	260														CAMPEP_0200860796-CAMNT_0047038291	39	PF13499.1: EF-hand domain pair PF00036.27: EF hand		Karlodinium micrum, Strain CCMP2283
contig_1255565_642_1884_+	0.03	0.03	0.03	0.77356	1.09373	1.31791	1.45682	0.03	0.964614	0.333505	1.5758	1.29469	0.61828	0.84467	0.769927	1.24784	0.433981	0.646885	0.215983	1.39092	0.03	0.188683	0.834777	0.720434	0.375217	-1.4142	0.0416416	-4.58583	1885	1243	414.333	noc:Noc_2921	groEL; chaperonin GroEL; K04077 chaperonin GroEL	noc03018	K04077	chaperonin GroEL	RNA degradation || Longevity regulating pathway - worm || Type I diabetes mellitus || Legionellosis || Tuberculosis		0005515||0005524||0006457||0016887||0044267	Q3J729					Thi970DRAFT_03334-GCA_000228725.3_JH603170	75	chaperonin GroL		Thiorhodovibrio 970
contig_1255796_950_1585_-	0.03	0.03	0.03	0.03	0.03	0.03	0.03	0.03	0.03	0.03	0.03	0.03	0.03	0.03	0.03	0.03	0.03	0.23094	0.03	0.251649	0.03	0.745928	0.834777	0.0501233	0.0400616	-4.64163	0.598524	-0.740519	3097	636	212	mpt:Mpe_A3660	putative alcohol dehydrogenase							A2SM24					Mpe_A3660-NC_008825	43	putative alcohol dehydrogenase	CAM_CRCL_27175	Methylibium petroleiphilum PM1
contig_1255881_940_1413_-	0.03	0.03	0.03	0.03	0.03	0.405263	0.03	0.03	0.03	0.03	0.03	0.503784	0.03	0.03	0.03	0.03	0.03	0.03	0.03	0.327403	0.03	0.689149	0.834777	0.0845928	0.0572964	-4.12541	0.35464	-1.49557	3471	474	158	adg:Adeg_0579	translation elongation factor Ts; K02357 elongation factor Ts		K02357	elongation factor Ts			0003746||0005515||0005622||0006414	C9RBV0					POR3G_02849-POR3G_contig_303.304	63	translation elongation factor Ts		Poribacteria WGA-3G
contig_1256002_63_916_-	0.03	0.03	0.03	1.38282	2.02062	2.7377	2.10675	2.10418	0.483444	0.913505	0.929968	0.292967	0.315415	0.03	0.209494	0.384513	0.03	0.179646	0.03	0.360138	0.03	0.42458	0.834777	0.696721	0.363361	-1.46053	0.0430588	-4.53755	916	854	284.667	apb:SAR116_1443	polar amino acid uptake family ABC transporter periplasmic substrate-binding protein (EC:4.2.1.51); K02030 polar amino acid transport system substrate-binding protein		K02030	polar amino acid transport system substrate-binding protein				D5BTT9					SAR116_1443-NC_014010	74	polar amino acid uptake family ABC transporter periplasmic substrate-binding protein (EC:4.2.1.51); K02030 polar amino acid transport system substrate-binding protein	CAM_CRCL_32721	Puniceispirillum marinum IMCC1322
contig_1256746_23_967_-	0.03	0.03	0.03	0.03	0.03	0.03	0.03	0.03	0.03	0.03	0.03	0.03	0.03	0.03	0.03	0.03	0.03	0.165236	0.03	0.03	0.03	0.823063	0.834777	0.0364398	0.0332199	-4.91181	0.823276	-0.280553	1131	945	315	rba:RB10629	groEL; heat shock protein GroEL; K04077 chaperonin GroEL	rba03018	K04077	chaperonin GroEL	RNA degradation || Longevity regulating pathway - worm || Type I diabetes mellitus || Legionellosis || Tuberculosis		0005524||0044267	Q7TTY9					RB10629-NC_005027	80	groEL; heat shock protein GroEL; K04077 chaperonin GroEL	CAM_CRCL_32430158	Rhodopirellula baltica SH 1
contig_1256814_1_570_-	0.03	0.03	0.03	0.03	0.361381	0.03	0.03	0.03	0.03	0.03	0.03	0.03	0.03	0.38531	0.298927	0.295574	0.03	0.478414	0.03	0.277314	0.03	0.540098	0.834777	0.121282	0.0756409	-3.72469	0.247358	-2.01533	570	570	190	sil:SPO0660	peptide ABC transporter, periplasmic peptide-binding protein; K02035 peptide/nickel transport system substrate-binding protein	sil02010	K02035	peptide/nickel transport system substrate-binding protein				Q5LVP0					SPO0660-NC_003911	67	peptide ABC transporter, periplasmic peptide-binding protein; K02035 peptide/nickel transport system substrate-binding protein	CAM_CRCL_4021698	Ruegeria pomeroyi DSS-3
contig_1257164_25_528_-	0.03	0.03	0.03	0.03	0.03	0.03	0.03	0.03	0.03	0.03	0.03	0.03	0.03	0.03	0.334143	0.03	0.03	0.03	0.03	0.3097	0.03	0.74584	0.834777	0.0578021	0.043901	-4.5096	0.519013	-0.946158	661	504	168	tet:TTHERM_00444870	EF hand family protein						5509		KOG0028	Ca2+-binding protein (centrin/caltractin), EF-Hand superfamily protein	Cytoskeleton	CELLULAR PROCESSES AND SIGNALING	CAMPEP_0202427840-CAMNT_0049038667	65	PF13499.1: EF-hand domain pair PF13405.1: EF-hand domain		Fabrea Fabrea salina
contig_1257322_510_1088_+	0.03	0.03	0.03	0.03	0.03	0.03	0.03	0.03	0.03	0.03	0.03	0.03	0.03	0.03	0.03	0.03	0.463634	0.03	0.03	0.03	0.03	0.823063	0.834777	0.0506493	0.0403246	-4.63219	0.592309	-0.755579	1380	579	193														CAMPEP_0200845726-CAMNT_0047018739	57			Karlodinium micrum, Strain CCMP2283
contig_1257728_1_532_-	0.03	0.03	0.03	0.898651	0.03	0.03	0.03	0.03	0.03	0.03	0.03	0.874262	0.03	0.03	0.03	0.03	0.03	0.270222	0.03	0.03	0.03	0.713079	0.834777	0.123006	0.0765032	-3.70834	0.24389	-2.0357	811	532	177.333														CAMPEP_0200824772-CAMNT_0046990539	72			Karlodinium micrum, Strain CCMP2283
contig_1258268_1_1025_+	0.03	0.03	0.03	0.03	0.03	0.03	0.03	0.03	0.03	0.03	0.03	0.03	0.03	0.03	0.03	0.177685	0.03	0.03	0.03	0.03	0.03	0.823063	0.834777	0.0370326	0.0335163	-4.89899	0.810097	-0.303834	1233	1025	341.667														CAMPEP_0200829790-CAMNT_0046997455	67			Karlodinium micrum, Strain CCMP2283
contig_1258673_1_549_+	0.03	0.03	0.03	0.03	0.03	0.03	0.03	0.03	0.03	0.03	0.03	0.439059	0.03	0.03	0.03	0.03	0.03	0.262783	0.03	0.286774	0.03	0.694336	0.834777	0.0727913	0.0513956	-4.28221	0.412137	-1.2788	549	549	183														CAMPEP_0186767350-CAMNT_0029648415	54			Azadinium spinosum 3D9
contig_1258912_289_934_+	0.03	0.03	0.03	0.03	0.03	0.03	0.03	0.03	0.03	0.03	0.03	0.03	0.03	0.03	0.03	0.03	0.22433	0.03	0.03	0.03	0.03	0.823063	0.834777	0.0392538	0.0346269	-4.85196	0.764257	-0.38787	934	646	215.333	pmb:A9601_02291	FAD-dependent pyridine nucleotide-disulphide oxidoreductase (EC:1.8.1.9); K00384 thioredoxin reductase (NADPH) [EC:1.8.1.9]	pmb00450||pmb00240	K00384	thioredoxin reductase (NADPH) [EC:1.8.1.9]	Pyrimidine metabolism || Selenocompound metabolism	1.8.1.9	0004791||0016491||0055114	A2BP06					gi488894747-NZ_DS999537	98	thioredoxin reductase	CAM_CRCL_4007269	Prochlorococcus marinus str. MIT 9202
contig_1259547_1_586_-	0.03	0.03	0.03	0.03	0.03	0.03	0.03	0.03	0.03	0.03	0.03	0.03	0.03	0.03	0.03	0.03	0.244227	0.03	0.03	0.03	0.03	0.823063	0.834777	0.0402013	0.0351006	-4.83236	0.746245	-0.42228	1741	586	195.333	pmb:A9601_01511	two-component response regulator (EC:3.1.1.61); K11329 two-component system, OmpR family, response regulator RpaB	pmb02020	K11329	two-component system, OmpR family, response regulator RpaB	Two-component system		0000160||0003677||0006355	A2BNS8					A9601_01511-NC_008816	100	two-component response regulator (EC:3.1.1.61); K11329 two-component system, OmpR family, response regulator RpaB	CAM_CRCL_4029809	Prochlorococcus marinus str. AS9601
contig_1259675_2085_3017_+	0.03	0.03	0.03	0.03	0.03	0.220648	0.03	0.03	0.03	0.03	0.03	0.03	0.03	0.03	0.194296	0.03	0.03	0.03	0.03	0.03	0.03	0.746348	0.834777	0.0469021	0.0384511	-4.70083	0.63963	-0.64469	4448	933	311	tac:Ta0004	V-type ATP synthase subunit A (EC:3.6.3.14); K02117 V-type H+-transporting ATPase subunit A [EC:3.6.3.14]	tac00190||tac00680||tac01100	K02117	V/A-type H+-transporting ATPase subunit A [EC:3.6.3.14]	Oxidative phosphorylation	3.6.3.14	0005524||0015991||0016820||0033178	Q9P997					AAA07O23_00774-AAA07O23_contig_66_0.32	94	Archaeal/vacuolar-type H+-ATPase subunit A		Thaumarchaeota archaeon SCGC AAA007-O23
contig_1259675_3085_4346_+	0.03	0.03	0.03	0.03	0.179673	0.170947	0.205668	0.03	0.03	0.03	0.03	0.207951	0.03	0.03	0.03	0.03	0.03	0.03	0.03	0.141703	0.03	0.582536	0.834777	0.0659972	0.0479986	-4.38086	0.454565	-1.13744	4448	1262	420.667	tac:Ta0005	V-type ATP synthase subunit B (EC:3.6.3.14); K02118 V-type H+-transporting ATPase subunit B [EC:3.6.3.14]	tac00190||tac00680||tac01100	K02118	V/A-type H+-transporting ATPase subunit B	Oxidative phosphorylation	3.6.3.14	0005524||0015991||0016820||0033178	Q9HM64	KOG1353	F0F1-type ATP synthase, alpha subunit	Energy production and conversion	METABOLISM	AAA07O23_00773-AAA07O23_contig_66_0.32	90	Archaeal/vacuolar-type H+-ATPase subunit B		Thaumarchaeota archaeon SCGC AAA007-O23
contig_1260199_1_936_+	0.03	0.03	0.03	0.03	0.03	0.410074	0.266851	0.03	0.03	0.03	0.03	0.269929	0.29041	0.03	0.357539	0.191728	0.03	0.166536	0.03	0.331215	0.03	0.463168	0.834777	0.127347	0.0786734	-3.66798	0.235577	-2.08573	936	936	312														gi448936880-KC465899	65	major capsid		Pelagibacter phage HTVC008M
contig_1261380_14_519_-	0.03	0.03	0.03	0.486643	1.14989	1.08459	1.34438	0.03	0.03	0.03	0.03	0.03	0.03	0.830501	0.332941	0.927493	0.03	0.03	0.03	0.03	0.03	0.524474	0.834777	0.313164	0.171582	-2.54303	0.0957965	-3.38388	519	506	168.667														gi85703648-NZ_AAMV01000001	66	ABC transporter,binding protein	CAM_CRCL_33933552	Roseovarius 217
contig_1261479_985_1417_-	0.03	0.03	0.03	0.03	0.03	0.03	0.03	0.03	0.03	0.901263	0.03	0.03	0.03	0.03	0.03	0.379601	0.03	0.03	0.03	0.03	0.03	0.767266	0.834777	0.0881364	0.0590682	-4.08147	0.340382	-1.55477	1418	433	144.333								0004872||0006810||0016020						GNIT_2631-NC_016041	39	TonB-dependent receptor		Glaciecola nitratireducens FR1064
contig_1262866_1_567_-	0.03	0.03	0.03	0.03	0.363135	0.03	0.03	0.03	0.03	0.03	0.03	0.426073	0.03	0.03	0.30035	0.03	0.03	0.03	0.03	0.03	0.03	0.68716	0.834777	0.077598	0.053799	-4.21628	0.386608	-1.37106	567	567	189	eba:ebA5660	ABC transporter substrate-binding protein; K02035 peptide/nickel transport system substrate-binding protein	eba02010	K02035	peptide/nickel transport system substrate-binding protein				Q5P021					gi159176869-ABHC01000033	53	ABC transporter, substrate-binding protein, family 5	CAM_CRCL_28084	alpha proteobacterium BAL199
contig_1263507_1_727_+	0.03	0.03	0.03	0.347828	0.289818	0.27467	0.334942	0.03	0.03	0.03	0.03	0.956713	0.365274	0.03	0.03	0.03	0.202678	0.03	0.03	0.03	0.03	0.57799	0.834777	0.151996	0.0909982	-3.45802	0.197373	-2.341	727	727	242.333														gi498192811-NZ_AFHZ01000016	91	peptide ABC transporter substrate-binding protein		gamma proteobacterium SCGC AAA001-B15
contig_1264069_155_952_-	0.03	0.03	0.03	0.03	0.03	0.03	0.03	0.03	0.03	0.03	0.03	0.03	0.03	0.283793	0.22209	0.409391	0.03	0.03	0.03	0.206653	0.03	0.647502	0.834777	0.0777108	0.0538554	-4.21476	0.386047	-1.37315	1632	798	266	tba:TERMP_00510	bmp family protein; K07335 basic membrane protein A and related proteins		K07335	basic membrane protein A and related proteins			5886	F0LJV0					TERMP_00510-NC_014804	43	bmp family protein; K07335 basic membrane protein A and related proteins	CAM_CRCL_15341	Thermococcus barophilus MP
contig_1264228_1_943_+	0.03	0.03	0.03	0.03	0.03	0.03	0.03	0.03	0.440648	0.03	0.437514	0.03	0.03	0.244769	0.03	0.190527	0.03	0.03	0.03	0.03	0.03	0.654549	0.834777	0.0868314	0.0584157	-4.0975	0.345497	-1.53325	1537	943	314.333	bpy:Bphyt_1486	NMT1/THI5 like domain protein; K02051 sulfonate/nitrate/taurine transport system substrate-binding protein	bpy02010	K02051	NitT/TauT family transport system substrate-binding protein				B2T2T9					gi497812105-NZ_AFMP01000040	53	NMT1/THI5 like domain-containing protein		Sphingomonas KC8
contig_1264738_1_670_-	0.03	0.03	0.03	0.03	0.03	0.03	0.03	0.03	0.03	0.59307	0.03	0.03	0.03	0.03	0.487577	0.707808	0.03	0.03	0.03	0.03	0.03	0.687413	0.834777	0.110879	0.0704394	-3.82747	0.270566	-1.88595	1193	670	223.333	shg:Sph21_3743	hypothetical protein												Sph21_3743-NC_015277	39	hypothetical protein	CAM_CRCL_4051692	Sphingobacterium 21
contig_1265093_1_435_-	0.03	0.03	0.03	0.03	0.03	0.03	0.03	0.03	0.03	0.03	0.03	0.546261	0.03	0.03	0.03	0.03	0.03	0.03	0.03	0.03	0.03	0.823063	0.834777	0.0545839	0.0422919	-4.56347	0.549613	-0.863512	435	435	145														CAMPEP_0186789380-CAMNT_0029672993	62			Azadinium spinosum 3D9
contig_1265200_1_826_-	0.03	0.03	0.03	0.03	0.03	0.03	0.03	0.03	0.03	0.03	0.03	0.03	0.03	0.03	0.03	0.03	0.03	0.03	0.309874	0.03	0.03	0.823063	0.834777	0.0433274	0.0366637	-4.7695	0.692403	-0.530316	1157	826	275.333	mpc:Mar181_3078	hypothetical protein												RKLH11_2090-NZ_DS999531	59	conserved hypothetical protein	CAM_CRCL_4005490	Rhodobacteraceae bacterium KLH11
contig_1265943_1_754_-	0.03	0.03	0.03	0.642894	0.280514	0.265908	0.03	0.03	0.03	0.03	0.03	0.03	0.03	0.03	0.03	0.03	0.03	0.03	0.03	0.03	0.03	0.716534	0.834777	0.0823484	0.0561742	-4.15395	0.364306	-1.45678	930	754	251.333														AMEC673_14570-NC_018678	94	protein SapC protein	CAM_CRCL_4007406	Alteromonas macleodii str. 'English Channel 673'
contig_1266063_1_657_+	0.03	0.03	0.03	0.381691	0.03	0.300738	0.03	0.03	0.03	0.03	0.03	0.03	0.03	0.03	0.03	0.03	0.03	0.03	0.03	0.03	0.03	0.747868	0.834777	0.0596395	0.0448197	-4.47972	0.503022	-0.991305	657	657	219	amc:MADE_1003310 || amc:MADE_1018740	fadB; multifunctional fatty acid oxidation complex subunit alpha (EC:5.1.2.3); K01825 3-hydroxyacyl-CoA dehydrogenase / enoyl-CoA hydratase / 3-hydroxybutyryl-CoA epimerase / enoyl-CoA isomerase [EC:1.1.1.35 4.2.1.17 5.1.2.3 5.3.3.8] || fadB; multifunctional fatty acid oxidation complex subunit alpha (EC:5.1.2.3)	amc01100||amc00280||amc01040||amc00310||amc01120||amc00640||amc01110||amc00650||amc00930||amc00903||amc00410||amc00281||amc00071||amc00380	K01825	3-hydroxyacyl-CoA dehydrogenase / enoyl-CoA hydratase / 3-hydroxybutyryl-CoA epimerase / enoyl-CoA isomerase [EC:1.1.1.35 4.2.1.17 5.1.2.3 5.3.3.8]	Fatty acid degradation || Valine, leucine and isoleucine degradation || Geraniol degradation || Lysine degradation || Benzoate degradation || Tryptophan metabolism || beta-Alanine metabolism || Propanoate metabolism || Butanoate metabolism || Limonene and pinene degradation || Caprolactam degradation || Biosynthesis of unsaturated fatty acids || Carbon metabolism || Fatty acid metabolism	5.3.3.8||5.1.2.3||1.1.1.35||4.2.1.17	0003824||0003857||0004165||0004300||0006631||0008152||0008692||0016491||0055114						MADE_1003310-NC_011138	90	fadB; multifunctional fatty acid oxidation complex subunit alpha (EC:5.1.2.3); K01825 3-hydroxyacyl-CoA dehydrogenase / enoyl-CoA hydratase / 3-hydroxybutyryl-CoA epimerase / enoyl-CoA isomerase [EC:1.1.1.35 4.2.1.17 5.1.2.3 5.3.3.8]	CAM_CRCL_32407819	Alteromonas macleodii str. 'Deep ecotype'
contig_1266294_7_727_-	0.03	0.03	0.03	0.03	0.553959	0.770117	0.337479	0.03	1.10418	0.553241	0.56299	0.341475	0.03	0.310897	0.45521	0.239954	0.03	0.384502	0.350633	0.225519	0.03	0.330833	0.834777	0.306198	0.168099	-2.57262	0.0979758	-3.35143	727	721	240.333														or1517-POR4C_contig00106standard	40	IPT/TIG domain.		Poribacteria WGA-4C
contig_1266479_1_610_-	0.03	0.03	0.03	0.03	1.57826	1.77959	0.756861	1.48193	0.664822	1.26691	1.91993	0.03	0.03	1.35805	1.28646	0.526319	0.03	0.03	0.03	0.03	0.03	0.394355	0.834777	0.616625	0.323312	-1.629	0.048652	-4.36136	724	610	203.333	cnc:CNE_1c02480	Leu/Ile/Val-binding protein 5; K01999 branched-chain amino acid transport system substrate-binding protein	cnc02010	K01999	branched-chain amino acid transport system substrate-binding protein	ABC transporters								gi159181050-ABHC01000004	76	Leu/Ile/Val-binding protein	CAM_CRCL_5179	alpha proteobacterium BAL199
contig_1266511_1_960_-	0.03	0.03	0.03	0.511378	0.817031	0.400572	0.49186	0.03	0.03	0.422976	0.03	0.263931	0.2839	0.240965	0.189675	0.187685	0.03	0.296246	0.03	0.176843	0.03	0.374652	0.834777	0.216812	0.123406	-3.01851	0.138368	-2.85341	1615	960	320	hmo:HM1_0884	branched-chain amino acid abc transporter, amino acid-binding protein							B0TAM9					HM1_0884-NC_010337	37	branched-chain amino acid abc transporter, amino acid-binding protein	CAM_CRCL_13635	Heliobacterium modesticaldum Ice1
contig_1266612_1_979_-	0.03	0.03	0.03	0.266018	0.03	0.21169	0.256448	0.03	0.03	0.03	0.03	1.40634	0.776917	0.236871	0.186576	0.493873	0.28646	0.291079	0.03	0.173993	0.03	0.52805	0.834777	0.23268	0.13134	-2.92862	0.128933	-2.95531	979	979	326.333	tps:THAPSDRAFT_9724	sig3; sig3-like protein							B8CC41					CAMPEP_0199150664-CAMNT_0044871701	35	PF07974.8: EGF-like domain		Vaucheria litorea, Strain CCMP2940
contig_1266695_1_715_+	0.03	0.03	0.03	0.03	0.03	0.527552	0.03	0.03	0.571597	0.03	0.567463	0.03	0.711802	0.313254	0.03	0.453433	0.03	0.208738	0.353323	0.621478	0.03	0.42938	0.834777	0.223269	0.126634	-2.98126	0.134367	-2.89575	728	715	238.333														TR2A62_0302-NZ_GG697169	66	prephrenate dehydratase	CAM_CRCL_2409	Thalassiobium R2A62
contig_1267067_1_1088_-	0.03	0.03	0.03	0.242372	0.377219	0.520464	0.437523	0.03	1.09776	1.07023	1.08961	0.23641	0.254029	0.588438	0.31178	0.4474	0.722301	0.617307	0.454956	0.03	0.03	0.270309	0.834777	0.4118	0.2209	-2.17853	0.0728509	-3.77891	1089	1088	362.667														CAMPEP_0200813042-CAMNT_0046974589	89			Karlodinium micrum, Strain CCMP2283
contig_1267297_8_832_-	0.03	0.03	0.03	0.590148	0.03	0.461212	0.298718	0.03	0.03	0.03	0.03	0.03	0.916342	0.03	0.03	0.03	0.03	0.03	0.03	0.03	0.03	0.660629	0.834777	0.13221	0.0811052	-3.62406	0.226911	-2.1398	853	825	275	gsu:GSU3038	fliC; flagellin FliC; K02406 flagellin	gsu02020||gsu02040	K02406	flagellin	Two-component system || Flagellar assembly || Plant-pathogen interaction || Salmonella infection || Legionellosis		0005198||0009288||0071973	Q748G4					KN400_2978-CP002031	45	flagellin FliC	CAM_CRCL_24713	Geobacter sulfurreducens KN400
contig_1267313_1_828_-	0.03	0.03	0.03	0.03	0.48625	0.03	0.833234	0.03	0.03	0.03	0.03	0.301224	1.50188	0.03	1.14078	0.944113	0.63646	0.184345	0.03	0.200252	0.03	0.509878	0.834777	0.31374	0.17187	-2.54061	0.0956205	-3.38654	1241	828	276														gi223938431-NZ_ABOX02000029	41	hypothetical protein	CAM_CRCL_4001241	Pedosphaera parvula Ellin514
contig_1267414_923_1207_-	0.03	0.03	0.03	0.840741	0.692763	0.03	0.03	0.03	0.03	0.03	0.03	0.03	0.03	0.03	0.03	0.03	0.470481	0.03	0.03	0.03	0.03	0.692592	0.834777	0.121142	0.0755711	-3.72602	0.247643	-2.01367	1902	285	95	ter:Tery_0983	phycobilisome protein; K05376 phycoerythrin alpha chain	ter01100||ter00196	K05376	phycoerythrin alpha chain	Photosynthesis - antenna proteins		0015979||0030089	Q117G1					LYNGBM3L_56060-GCA_000211815.1_GL890874	86	phycobilisome protein		Moorea producens 3L
contig_1267845_1_942_-	0.97122	0.03	0.03	0.03	0.03	0.03	0.03	0.03	0.03	0.03	0.03	0.03	0.03	0.03	0.03	0.03	0.03	0.03	0.03	0.03	0.03	0.823063	0.834777	0.07482	0.05241	-4.25401	0.400962	-1.31846	1108	942	314	pmb:A9601_13281	putative chaperon-like protein for quinone binding in photosystem II							A2BS51					A9601_13281-NC_008816	77	putative chaperon-like protein for quinone binding in photosystem II	CAM_CRCL_20155	Prochlorococcus marinus str. AS9601
contig_1268307_1_982_-	0.03	0.03	0.03	0.03	0.03	0.211135	0.03	0.03	0.03	0.03	0.03	0.03	0.03	0.03	0.03	0.184152	0.03	0.16014	0.03	0.173553	0.03	0.6308	0.834777	0.0589991	0.0444995	-4.49007	0.508483	-0.97573	1612	982	327.333	rli:RLO149_c007580	dctP3; TRAP transporter subunit DctP						0006810||0030288						gi85706294-NZ_AAMV01000011	28	trap dicarboxylate transporter- dctp subunit	CAM_CRCL_33331752	Roseovarius 217
contig_1268600_1_1276_-	0.03	0.03	0.03	0.03	0.178031	0.1694	0.03	0.03	0.03	0.03	0.03	0.03	0.03	0.18872	0.150132	0.03	0.03	0.03	0.03	0.03	0.03	0.629729	0.834777	0.0569659	0.0434829	-4.52341	0.526631	-0.925135	1277	1276	425.333														gi30044131-NC_004735	43	similar to major head protein	CAM_CRCL_23190	Rhodothermus phage RM378
contig_1269058_1_1353_-	0.03	0.03	0.03	0.371554	0.03	0.03	0.03	0.03	0.03	0.03	0.03	0.03	0.03	0.03	0.03	0.03	0.03	0.03	0.03	0.03	0.03	0.823063	0.834777	0.0462645	0.0381322	-4.71285	0.648446	-0.624942	1354	1353	451	amc:MADE_1017450 || amc:MADE_1018485	putative outer membrane receptor for iron transport; K02014 iron complex outermembrane recepter protein || putative outer membrane receptor for iron transport		K02014	iron complex outermembrane recepter protein			0004872||0006810||0016020						MADE_1017450-NC_011138	99	putative outer membrane receptor for iron transport; K02014 iron complex outermembrane recepter protein	CAM_CRCL_14214465	Alteromonas macleodii str. 'Deep ecotype'
contig_1269075_1_557_+	0.03	0.03	0.03	0.03	0.369116	0.03	0.428012	0.03	0.725227	0.03	0.719921	0.03	0.03	0.03	0.305203	0.573545	0.03	0.03	0.03	0.03	0.03	0.556653	0.834777	0.170049	0.100024	-3.32158	0.17642	-2.50291	1339	557	185.667	rli:RLO149_c021580	leucine-, isoleucine-, valine-, threonine-, and alanine-binding protein; K01999 branched-chain amino acid transport system substrate-binding protein	rli02010	K01999	branched-chain amino acid transport system substrate-binding protein	ABC transporters								JCVI_PEP_metagenomic.orf.1126664262622.1-SAR324	88		CAM_CRCL_13635	SAR324 cluster bacterium JCVI-SC AAA005
contig_1269642_1_664_-	0.03	0.03	0.03	1.42193	0.598938	0.565767	0.03	0.03	0.03	0.03	0.03	0.03	0.03	0.03	0.03	0.03	0.03	0.03	0.03	0.03	0.03	0.716534	0.834777	0.148888	0.0894438	-3.48287	0.201494	-2.31119	664	664	221.333														AMBAS45_11105-NC_018679	100	electron transfer flavoprotein subunit beta		Alteromonas macleodii str. 'Balearic Sea AD45'
contig_1270194_1_742_+	0.03	0.03	0.03	0.03	0.284565	0.269723	0.328777	0.03	0.03	0.03	0.03	0.03	0.03	0.03	0.03	0.03	0.03	0.374469	0.03	0.979925	0.451637	0.188869	0.834777	0.149481	0.300559	-1.73428	3.02137	1.5952	742	742	247.333	oca:OCAR_7523	extracellular solute-binding protein, family 5; K02035 peptide/nickel transport system substrate-binding protein	oca02010	K02035	peptide/nickel transport system substrate-binding protein				B6JJN2					YUODRAFT_06721-YUODRAFT_scaffold_68.69	64	ABC-type dipeptide transport system, periplasmic component		Bradyrhizobium elkanii WSM1741
contig_1270208_303_727_+	0.03	0.03	0.03	0.03	0.03	0.03	0.03	0.03	0.03	0.03	0.03	1.08682	0.03	0.03	0.03	0.03	0.325382	0.330701	0.573944	1.02507	0.03	0.63039	0.834777	0.181996	0.105998	-3.23789	0.164839	-2.60087	727	425	141.667	bpu:BPUM_1151	hag4; flagellin; K02406 flagellin	bpu02020||bpu02040	K02406	flagellin	Two-component system || Flagellar assembly || Plant-pathogen interaction || Salmonella infection || Legionellosis		0005198||0009288||0071973	A8FC68					JCVI_PEP_metagenomic.orf.1126664251466.1-SAR324	68		CAM_CRCL_34374	SAR324 cluster bacterium JCVI-SC AAA005
contig_1271364_1_695_-	0.03	0.03	0.03	0.03	0.03	0.03	0.03	0.03	0.587182	0.03	0.03	0.03	0.03	0.03	0.03	0.03	0.03	0.03	0.03	0.03	0.03	0.823063	0.834777	0.0565325	0.0432662	-4.53061	0.530668	-0.914117	695	695	231.667	abc:ACICU_03089	outer membrane protein; K03286 OmpA-OmpF porin, OOP family		K03286	OmpA-OmpF porin, OOP family				B2HYG2					gi494747170-NZ_BAEB01000031	80	membrane protein		Acinetobacter NBRC 100985
contig_1271391_34_954_-	0.03	0.03	0.03	0.280881	0.235089	0.03	0.03	0.03	0.03	0.03	0.03	0.03	0.03	0.03	0.03	0.03	0.03	0.03	0.03	0.03	0.03	0.746961	0.834777	0.0517129	0.0408564	-4.61329	0.580126	-0.785561	1127	921	307	pae:PA5119 || pau:PA14_67600 || pap:PSPA7_5853 || pag:PLES_55091	glnA; glutamine synthetase; K01915 glutamine synthetase [EC:6.3.1.2] || glnA; glutamine synthetase; K01915 glutamine synthetase [EC:6.3.1.2] || glnA; glutamine synthetase (EC:6.3.1.2); K01915 glutamine synthetase [EC:6.3.1.2] || glnA; glutamine synthetase; K01915 glutamine synthetase [EC:6.3.1.2]	pau02020||pau00910||pau00330||pau01100||pau01120||pau00250	K01915	glutamine synthetase [EC:6.3.1.2]	Arginine biosynthesis || Alanine, aspartate and glutamate metabolism || Glyoxylate and dicarboxylate metabolism || Nitrogen metabolism || Biosynthesis of amino acids || Two-component system || Glutamatergic synapse || GABAergic synapse	6.3.1.2	0004356||0006542||0006807	Q02EP7					G655_26945-NC_020912	93	synthetase	CAM_CRCL_784	Pseudomonas aeruginosa B136-33
contig_1271766_1_726_+	0.03	0.03	0.03	0.03	0.290175	0.03	0.335362	0.03	0.03	0.03	0.03	0.03	0.03	0.03	0.241141	0.238509	0.03	0.03	0.03	0.03	0.03	0.633062	0.834777	0.0769136	0.0534568	-4.22548	0.390048	-1.35828	746	726	242	pjd:Pjdr2_5606	oxidoreductase domain protein						0008152||0016491||0055114	C6D440					or1723-POR4E_contig00324standard	78	Predicted dehydrogenases and related proteins		Poribacteria WGA-4E
contig_1271846_1_537_-	0.03	0.03	0.03	0.03	0.03	0.03	0.442835	0.03	0.03	0.03	0.03	0.03	0.03	0.03	0.315453	0.311894	0.03	0.03	0.460496	0.03	0.03	0.635568	0.834777	0.0971752	0.0635876	-3.97511	0.308721	-1.69563	683	537	179	tet:TTHERM_00773700	hypothetical protein												GSPATP00009857001-PTET	27	hypothetical protein	CAM_CRCL_27115123	Paramecium tetraurelia
contig_1272038_1_482_+	0.03	0.03	0.03	0.03	0.421882	0.03	0.03	0.03	0.03	0.03	0.03	0.03	0.03	0.03	0.348025	0.03	0.03	0.03	0.03	0.03	0.03	0.747059	0.834777	0.0638051	0.0469026	-4.41419	0.470182	-1.08871	782	482	160.667								0008553||0015078||0015991||0016471||0033177		KOG0232	Vacuolar H+-ATPase V0 sector, subunits c/c'	Energy production and conversion	METABOLISM	CAMPEP_0170479658-CAMNT_0010752095	63	TIGR01100: V_ATP_synt_C: V-type ATPase, C subunit PF00137.16: ATP synthase subunit C		Strombidium inclinatum
contig_1272483_176_867_+	0.03	0.03	0.03	0.03	0.03	0.03	0.03	0.03	0.03	0.575169	0.03	0.03	0.03	0.03	0.03	0.03	0.03	0.03	0.36407	0.03	0.03	0.753083	0.834777	0.0718685	0.0509343	-4.29522	0.417429	-1.2604	867	692	230.667	pmc:P9515_04681	O-acetylserine (thiol)-lyase A (EC:2.5.1.47); K01738 cysteine synthase A [EC:2.5.1.47]	pmc00270||pmc01100||pmc01120||pmc00920	K01738	cysteine synthase A [EC:2.5.1.47]	Cysteine and methionine metabolism || Sulfur metabolism || Carbon metabolism || Biosynthesis of amino acids	2.5.1.47	4124	A2BV66					P9515_04681-NC_008817	90	O-acetylserine (thiol)-lyase A (EC:2.5.1.47); K01738 cysteine synthase A [EC:2.5.1.47]	CAM_CRCL_9330	Prochlorococcus marinus str. MIT 9515
contig_127310_1_407_+	0.03	0.03	0.03	0.03	0.03	0.03	0.03	0.03	0.03	0.03	0.03	0.03	0.03	0.03	0.03	0.03	0.338445	0.03	0.03	0.03	0.03	0.823063	0.834777	0.0446879	0.0373439	-4.74298	0.671323	-0.574921	407	407	135.667								0016620||0055114		KOG0657	Glyceraldehyde 3-phosphate dehydrogenase	Carbohydrate transport and metabolism	METABOLISM	CAMPEP_0200761564-CAMNT_0046913175	91	TIGR01534: GAPDH-I: glyceraldehyde-3-phosphate dehydrogenase, type I PF02800.15: Glyceraldehyde 3-phosphate dehydrogenase, C-terminal domain		Karlodinium micrum, Strain CCMP2283
contig_1273179_201_1099_-	0.03	0.03	0.03	0.03	0.03	0.03	0.03	0.03	0.03	0.03	0.03	0.03	0.03	0.03	0.03	0.03	0.448923	0.456467	0.544297	0.03	0.03	0.684674	0.834777	0.094747	0.0623735	-4.00292	0.316633	-1.65912	1672	899	299.667	pmh:P9215_18721	mhpC; alpha/beta superfamily hydrolase/acyltransferase							A8G7A4	KOG1454	Predicted hydrolase/acyltransferase (alpha/beta hydrolase superfamily)	General function prediction only	POORLY CHARACTERIZED	gi488896152-NZ_DS999537	73	alpha/beta hydrolase	CAM_CRCL_6710	Prochlorococcus marinus str. MIT 9202
contig_1273848_1_764_-	1.19051	0.03	0.03	0.03	0.03	0.03	0.03	0.03	0.03	0.03	0.03	0.03	0.03	0.295088	0.03	0.03	0.358631	0.03	0.332587	0.214514	0.03	0.68057	0.834777	0.13673	0.083365	-3.58441	0.219411	-2.1883	764	764	254.667	pmh:P9215_01611	pds; phytoene desaturase; K02293 phytoene dehydrogenase, phytoene desaturase [EC:1.14.99.-]	pmh01100||pmh01110||pmh00906	K02293	15-cis-phytoene desaturase [EC:1.3.5.5]	Carotenoid biosynthesis		0016491||0055114	A8G2E9					gi488894291-NZ_DS999537	93	15-cis-phytoene desaturase	CAM_CRCL_9702	Prochlorococcus marinus str. MIT 9202
contig_1276556_253_685_+	0.03	0.03	0.03	0.03	0.03	0.03	0.03	0.03	0.03	0.03	0.03	0.03	0.03	0.03	0.03	0.03	0.319924	0.03	0.03	0.03	0.03	0.823063	0.834777	0.0438059	0.036903	-4.76012	0.684839	-0.546163	685	433	144.333														CAMPEP_0178998180-CAMNT_0020690853	38	TIGR03921: T7SS_mycosin: type VII secretion-associated serine protease mycosin PF00082.17: Subtilase family PF00100.18: Zona pellucida-like domain		Amoebophrya sp.
contig_1276728_1_520_+	0.03	0.03	0.03	0.03	0.03	0.03	0.03	0.03	0.03	0.03	0.03	0.03	0.03	0.03	0.03	0.03	0.03	0.03	0.03	0.301094	0.03	0.823063	0.834777	0.0429092	0.0364546	-4.77775	0.69915	-0.516326	1874	520	173.333	fbc:FB2170_04510	transcription regulator							A4ANE7					POR3G_01162-POR3G_contig_303.304	75	Putative translation initiation inhibitor, yjgF family		Poribacteria WGA-3G
contig_1277017_1_1096_+	0.03	0.03	0.03	0.03	0.03	0.03	0.03	0.03	0.03	0.03	0.03	0.03	0.03	0.03	0.03	0.03	0.03	0.146604	0.03	0.673106	0.03	0.793149	0.834777	0.0661767	0.0480883	-4.37817	0.453332	-1.14136	2145	1096	365.333														POR3G_00051-POR3G_contig_303.304	57	Uncharacterized protein conserved in bacteria		Poribacteria WGA-3G
contig_1277027_3_936_-	0.03	0.03	0.03	0.03	0.03	0.03	0.03	0.03	0.03	0.03	0.03	0.03	0.03	0.03	0.03	0.03	0.03	0.03	0.03	0.18093	0.03	0.823063	0.834777	0.0371872	0.0335936	-4.89567	0.80673	-0.309842	936	934	311.333														CAMPEP_0197705416-CAMNT_0043289325	44			Pelagodinium beii
contig_1277245_1998_2999_+	0.03	0.03	0.03	0.03	0.21851	0.03	0.03	0.03	0.03	0.03	0.03	0.03	0.03	0.03	0.182982	0.181075	0.03	0.03	0.03	0.03	0.03	0.684996	0.834777	0.0534556	0.0417278	-4.58285	0.561213	-0.833379	4462	1002	334	amt:Amet_2716	hypothetical protein; K02390 flagellar hook protein FlgE	amt02040	K02390	flagellar hook protein FlgE	Flagellar assembly		30694	A6TRQ0					Halha_0661-Halha_Contig26.1	30	flagellar basal-body rod protein FlgF		Halobacteroides halobius DSM 5150
contig_1277654_1_451_+	0.03	0.03	0.03	0.03	0.448819	0.03	0.03	0.03	0.03	0.03	0.03	0.527946	0.570452	0.03	0.70977	0.365648	0.03	0.03	0.03	0.655139	0.03	0.541197	0.834777	0.177513	0.103757	-3.26873	0.169002	-2.56489	451	451	150.333														POR3G_00339-POR3G_contig_303.304	52	hypothetical protein		Poribacteria WGA-3G
contig_1278045_998_1897_-	0.03	0.03	0.03	0.03	0.03	0.227639	0.03	0.03	0.03	0.03	0.03	0.03	0.03	0.03	0.03	0.03	0.03	0.03	0.03	0.186632	0.03	0.747402	0.834777	0.04687	0.038435	-4.70143	0.640068	-0.643703	2630	900	300								0000275||0005524||0015986||0015992||0045261||0045262||0046034||0046933						or0177-POR4E_contig00324standard	74	ATP synthase F1 subcomplex beta subunit		Poribacteria WGA-4E
contig_1278086_1_446_+	0.03	0.03	0.03	0.03	0.453514	0.03	0.03	0.03	0.03	0.03	0.03	0.03	0.03	0.03	0.03	0.03	0.03	0.03	0.03	0.03	0.03	0.823063	0.834777	0.0501673	0.0400837	-4.64084	0.597999	-0.741786	446	446	148.667	amc:MADE_1009490	succinate dehydrogenase catalytic subunit; K00240 succinate dehydrogenase iron-sulfur subunit [EC:1.3.99.1]	amc01110||amc01100||amc00650||amc00020||amc00190||amc01120	K00240	succinate dehydrogenase / fumarate reductase, iron-sulfur subunit [EC:1.3.5.1 1.3.5.4]	Citrate cycle (TCA cycle) || Oxidative phosphorylation || Butanoate metabolism || Carbon fixation pathways in prokaryotes || Carbon metabolism	1.3.99.1	0000104||0006099||0009055||0009060||0009061||0051536						amad1_10295-NC_019393	88	succinate dehydrogenase catalytic subunit	CAM_CRCL_14580996	Alteromonas macleodii AltDE1
contig_1278091_1_769_-	0.03	0.03	0.03	0.03	0.03	0.261307	0.03	0.03	0.03	0.03	0.03	0.03	0.03	0.03	0.03	0.03	0.03	0.03	0.03	0.03	0.03	0.823063	0.834777	0.0410146	0.0355073	-4.81574	0.731447	-0.451175	1598	769	256.333														AMEC673_01545-NC_018678	96	peptidyl-dipeptidase Dcp		Alteromonas macleodii str. 'English Channel 673'
contig_1278120_1936_2594_-	0.03	0.03	0.03	0.03	0.03	0.299916	0.03	0.03	0.03	0.03	0.03	0.03	0.03	0.03	0.03	0.03	0.03	0.03	0.03	0.03	0.03	0.823063	0.834777	0.0428532	0.0364266	-4.77886	0.700065	-0.514439	2596	659	219.667	vex:VEA_002570	2-methylisocitrate dehydratase (EC:4.2.1.3 4.2.1.99); K01682 aconitate hydratase 2 [EC:4.2.1.3]	vex01120||vex01100||vex01110||vex00020||vex00630	K01682	aconitate hydratase 2 / 2-methylisocitrate dehydratase [EC:4.2.1.3 4.2.1.99]	Citrate cycle (TCA cycle) || Glyoxylate and dicarboxylate metabolism || Propanoate metabolism || Carbon fixation pathways in prokaryotes || Carbon metabolism || 2-Oxocarboxylic acid metabolism || Biosynthesis of amino acids	4.2.1.3	0003994||0006099	D0M7V3					vfu_A00899-CP002377	89	bifunctional aconitate hydratase 2/2-methylisocitrate dehydratase	CAM_CRCL_1235	Vibrio furnissii NCTC 11218
contig_1278135_6_824_-	0.03	0.03	0.03	0.03	0.03	0.247185	0.03	0.03	0.03	0.03	0.03	0.03	0.03	0.03	0.03	0.03	0.03	0.03	0.03	0.03	0.03	0.823063	0.834777	0.0403422	0.0351711	-4.82947	0.743639	-0.427326	2058	819	273								0005198||0009288||0071973						G655_19795-NC_020912	78	flagellin		Pseudomonas aeruginosa B136-33
contig_1278398_1_1055_+	0.03	0.03	0.03	0.03	0.03	0.535805	0.03	0.03	0.03	0.03	0.03	0.03	0.03	0.03	0.03	0.03	0.03	0.03	0.03	0.03	0.03	0.823063	0.834777	0.054086	0.042043	-4.57199	0.554673	-0.850292	1090	1055	351.667	van:VAA_01888	General L-amino acid-binding protein; K09969 general L-amino acid transport system substrate-binding protein	van02010	K09969	general L-amino acid transport system substrate-binding protein	ABC transporters								VFA_001588-NZ_ACZP01000013	95	amino acid ABC transporter amino acid-binding protein	CAM_CRCL_3107	Vibrio furnissii CIP 102972
contig_1278401_1_971_-	0.03	0.03	0.03	0.03	0.03	0.03	0.03	0.03	0.428807	0.418524	0.425763	0.03	0.03	0.03	0.03	0.03	0.03	0.161615	0.268081	0.175179	0.352198	0.131358	0.834777	0.126198	0.239198	-2.06372	2.79083	1.48069	1573	971	323.667	ade:Adeh_3594	groEL; chaperonin GroEL; K04077 chaperonin GroEL	ade03018	K04077	chaperonin GroEL	RNA degradation || Longevity regulating pathway - worm || Type I diabetes mellitus || Legionellosis || Tuberculosis		0005524||0044267	Q2IFK0					Adeh_3594-NC_007760	81	groEL; chaperonin GroEL; K04077 chaperonin GroEL	CAM_CRCL_32430158	Anaeromyxobacter dehalogenans 2CP-C
contig_1278680_103_907_+	0.03	0.03	0.03	0.03	0.03	0.03	0.03	0.03	0.03	0.03	0.03	0.03	0.03	0.03	0.03	0.03	0.03	0.03	0.03	0.205117	0.03	0.823063	0.834777	0.0383389	0.0341694	-4.87115	0.782495	-0.353846	907	805	268.333														POR3G_03686-POR3G_contig_303.304	38	hypothetical protein		Poribacteria WGA-3G
contig_1278990_46_713_+	0.03	0.03	0.03	0.03	0.03	0.03	0.03	0.03	0.03	0.03	0.03	0.03	0.03	0.333184	0.03	0.03	0.03	0.03	0.03	0.03	0.03	0.823063	0.834777	0.0444373	0.0372187	-4.74783	0.675108	-0.56681	868	668	222.667														gi255929027-NC_013085	47	major capsid protein	CAM_CRCL_625	Synechococcus phage S-RSM4
contig_1279048_1_1020_-	0.03	0.03	0.03	0.03	0.03	0.03	0.03	0.03	0.03	0.769719	0.03	0.03	0.03	0.228556	0.03	0.178409	0.03	0.03	0.03	0.168205	0.03	0.720063	0.834777	0.088328	0.059164	-4.07914	0.339643	-1.55791	1391	1020	340	mpt:Mpe_A1591	putative quinoprotein ethanol dehydrogenase							A2SG64					METUNv1_02321-GCA_000214035.2_contig00070	54	Putative PQQ-dependent dehydrogenase		Methyloversatilis universalis FAM5
contig_1279345_1_981_+	0.03	0.03	0.03	0.736609	0.800183	0.75528	0.481973	0.03	0.819483	1.18369	0.813458	0.258923	0.775395	0.649348	0.655028	0.801545	0.285937	0.160273	0.03	0.317398	0.03	0.224309	0.834777	0.460692	0.245346	-2.02711	0.0651195	-3.94077	981	981	327														gi159179808-ABHC01000009	60	ABC transporter, substrate-binding protein, family 5	CAM_CRCL_22694	alpha proteobacterium BAL199
contig_1279385_11_778_-	0.03	0.03	0.03	0.330861	0.275947	0.261608	0.03	0.03	0.03	0.03	0.03	0.03	0.03	0.03	0.03	0.03	0.03	0.196404	0.03	0.03	0.03	0.636062	0.834777	0.0749914	0.0524957	-4.25166	0.400046	-1.32176	850	768	256														JCVI_PEP_metagenomic.orf.1126664245852.1-SAR324	57		CAM_CRCL_4021311	SAR324 cluster bacterium JCVI-SC AAA005
contig_1279386_1_734_-	0.03	0.03	0.03	0.03	0.28734	0.03	0.332034	0.03	0.03	0.543974	0.03	0.335959	0.03	0.305922	0.03	0.442472	0.03	0.204112	0.03	0.03	0.03	0.510439	0.834777	0.136753	0.0833765	-3.58422	0.219374	-2.18854	935	734	244.667	rde:RD1_4074	basic membrane protein, putative; K02058 simple sugar transport system substrate-binding protein		K02058	simple sugar transport system substrate-binding protein			5886	Q160S5					gi114769990-NZ_AATR01000002	67	Basic membrane protein	CAM_CRCL_11806	Rhodobacterales bacterium HTCC2255
contig_1279390_157_909_-	0.03	0.03	0.03	0.03	0.782539	0.266222	0.03	0.03	0.03	0.03	0.03	0.626477	0.677395	0.29896	0.43714	0.633096	0.696864	0.539155	0.03	1.34047	0.03	0.426268	0.834777	0.315634	0.172817	-2.53268	0.0950468	-3.39522	2383	753	251														SinTW10DRAFT_00025910-SinTW10DRAFT_scaffold_56.57	72	ABC-type nitrate/sulfonate/bicarbonate transport systems, periplasmic components		Sinorhizobium TW10
contig_1279394_68_907_-	0.03	0.03	0.03	0.03	0.254866	0.03	0.03	0.03	0.03	0.03	0.03	0.297349	0.03	0.03	0.03	0.210211	0.03	0.18214	0.03	1.03692	0.03	0.693985	0.834777	0.117214	0.0736068	-3.76402	0.255943	-1.96611	1519	840	280	pgv:SL003B_1044	ABC-type branched-chain amino acid transporter periplasmic amino acid-binding protein; K01999 branched-chain amino acid transport system substrate-binding protein	pgv02010	K01999	branched-chain amino acid transport system substrate-binding protein	ABC transporters								YY3DRAFT_03378-YY3DRAFT_scaffold_146.147	58	ABC-type branched-chain amino acid transport systems, periplasmic component		Rhizobium STM 6155
contig_1279767_429_881_+	0.03	0.03	0.03	1.05014	1.69788	1.60064	1.00878	0.03	0.03	0.03	0.03	2.01299	4.33453	0.924158	0.368384	0.03	0.307124	0.312115	0.03	0.963568	0.03	0.507153	0.834777	0.708586	0.369293	-1.43716	0.0423379	-4.56191	959	453	151	puv:PUV_25370	hypothetical protein; K03561 biopolymer transport protein ExbB		K03561	biopolymer transport protein ExbB									POR3G_00338-POR3G_contig_303.304	53	Biopolymer transport proteins		Poribacteria WGA-3G
contig_1279805_27_742_-	0.03	0.03	0.03	0.03	0.03	0.03	0.03	0.03	0.03	0.03	0.03	0.03	0.03	0.03	0.24409	0.03	0.03	0.03	0.03	0.03	0.03	0.823063	0.834777	0.0401947	0.0350974	-4.83249	0.746366	-0.422044	742	716	238.667														or1979-POR4C_contig00106standard	32	hypothetical protein		Poribacteria WGA-4C
contig_1279884_13_705_-	0.03	0.03	0.03	0.03	0.03	0.03	0.349903	0.03	0.58879	0.574382	0.584525	0.03	0.03	0.03	0.251195	0.03	0.03	0.03	0.03	0.436836	0.03	0.551049	0.834777	0.154078	0.0920389	-3.44161	0.194707	-2.36062	705	693	231														PB7211_130-NZ_DS995298	76	receptor family ligand-binding protein	CAM_CRCL_31612877	Pelagibacter HTCC7211
contig_1280086_1_876_-	0.03	0.03	0.03	0.03	0.03	0.436107	0.03	0.03	0.03	0.03	0.03	0.03	0.03	0.03	0.03	0.03	0.03	0.03	0.03	0.03	0.03	0.823063	0.834777	0.0493384	0.0396692	-4.65584	0.608045	-0.717749	2369	876	292	vpa:VP2212	long-chain fatty acid transport protein; K06076 long-chain fatty acid transport protein		K06076	long-chain fatty acid transport protein				Q87ML9					vfu_A02556-CP002377	87	long-chain fatty acid transport protein	CAM_CRCL_3564	Vibrio furnissii NCTC 11218
contig_1280096_1022_2104_+	0.03	0.03	0.03	0.03	0.03	0.03	0.03	0.03	0.03	0.03	0.03	0.03	0.03	0.03	0.03	0.03	0.03	0.148004	0.670378	1.07132	0.03	0.735747	0.834777	0.1157	0.0728501	-3.77893	0.259291	-1.94736	2503	1083	361	ddf:DEFDS_0240	groEL; chaperonin GroEL; K04077 chaperonin GroEL	ddf03018	K04077	chaperonin GroEL	RNA degradation || Longevity regulating pathway - worm || Type I diabetes mellitus || Legionellosis || Tuberculosis		0005524||0044267	D3PAX8					or2814-POR4E_contig00324standard	88	chaperonin GroL		Poribacteria WGA-4E
contig_1280254_1_942_-	0.03	0.03	0.03	0.765864	0.631552	0.785307	1.6774	0.03	0.852169	0.83097	0.437947	0.268401	0.806255	1.53498	0.518179	1.15488	0.4298	0.437	0.03	0.329297	0.03	0.269915	0.834777	0.554286	0.292143	-1.77525	0.0541237	-4.2076	1206	942	314														PGA1_c27330-NC_018290	69	extracellular solute-binding protein	CAM_CRCL_20169	Phaeobacter gallaeciensis DSM 17395 = CIP 105210
contig_1280354_194_661_+	0.03	0.03	0.03	0.523721	0.433605	0.790149	0.503702	0.03	0.03	0.03	0.03	1.46957	0.550821	0.46275	0.357539	0.676911	0.298242	0.03	0.03	1.23486	0.03	0.414394	0.834777	0.361994	0.195997	-2.3511	0.0828743	-3.59293	691	468	156								0009055||0016491||0016625||0051536||0055114						MEALZ_0765-NC_016112	72	aor; Tungsten-containing aldehyde ferredoxin oxidoreductase		Methylomicrobium alcaliphilum 20Z
contig_1280390_1_1039_-	0.03	0.03	0.03	0.919552	0.211797	1.05719	1.31023	0.03	1.14812	1.48238	2.61903	1.11072	1.20297	1.00462	0.620137	1.34126	0.392475	0.768006	0.697496	0.844065	0.632222	0.741908	0.834777	0.832489	0.732356	-0.449384	0.759436	-0.397	2671	1039	346.333	oih:OB3270	hypothetical protein						30288	Q8ELF7					ORF0187-A536K22DRAFT_NOD	41	IMG gene_oid=2236277572		alpha proteobacterium SCGC AAA536-K22
contig_1280403_1_487_-	0.03	0.03	0.03	0.03	0.417859	0.395246	0.03	0.03	0.03	0.03	0.03	0.491137	0.03	0.03	0.03	0.03	0.03	0.03	0.03	1.76678	0.672411	0.235236	0.834777	0.201116	0.436764	-1.19508	3.3434	1.74132	1146	487	162.333	dca:Desca_0481	60 kDa chaperonin; K04077 chaperonin GroEL	dca03018	K04077	chaperonin GroEL	RNA degradation || Longevity regulating pathway - worm || Type I diabetes mellitus || Legionellosis || Tuberculosis		0005524||0044267						Desca_0481-NC_015565	64	60 kDa chaperonin; K04077 chaperonin GroEL	CAM_CRCL_36	Desulfotomaculum carboxydivorans CO-1-SRB
contig_1280704_53_1009_+	0.03	0.03	0.03	0.03	0.03	0.215867	0.03	0.03	0.03	0.03	0.03	0.03	0.03	0.03	0.03	0.03	0.03	0.03	0.03	0.03	0.03	0.823063	0.834777	0.0388508	0.0344254	-4.86038	0.772185	-0.372982	1193	957	319	vha:VIBHAR_03393	polynucleotide phosphorylase/polyadenylase; K00962 polyribonucleotide nucleotidyltransferase [EC:2.7.7.8]	vha00240||vha00230||vha03018	K00962	polyribonucleotide nucleotidyltransferase [EC:2.7.7.8]	Purine metabolism || Pyrimidine metabolism || RNA degradation	2.7.7.8	0000175||0003723||0004654||0006396	A7MZI2					VFA_004234-NZ_ACZP01000020	88	polyribonucleotide nucleotidyltransferase	CAM_CRCL_2544	Vibrio furnissii CIP 102972
contig_1280809_276_702_+	0.03	0.03	0.03	0.03	0.472359	0.446569	0.03	0.03	0.03	0.03	0.03	0.555933	0.03	0.03	0.03	0.03	0.03	0.927878	0.03	0.03	0.03	0.649827	0.834777	0.138702	0.0843509	-3.56745	0.216291	-2.20895	702	427	142.333														CAMPEP_0200812108-CAMNT_0046973451	72			Karlodinium micrum, Strain CCMP2283
contig_1280811_1_585_+	0.03	0.03	0.03	0.03	0.352884	0.03	0.03	0.03	0.03	0.03	0.03	0.03	0.446656	0.03	0.03	0.03	0.03	0.248458	0.03	0.03	0.03	0.693763	0.834777	0.075619	0.0528095	-4.24306	0.396726	-1.33379	585	585	195	pca:Pcar_0728	rpoA; DNA-directed RNA polymerase subunit alpha (EC:2.7.7.6); K03040 DNA-directed RNA polymerase subunit alpha [EC:2.7.7.6]	pca00240||pca03020||pca00230||pca01100	K03040	DNA-directed RNA polymerase subunit alpha [EC:2.7.7.6]	Purine metabolism || Pyrimidine metabolism || RNA polymerase	2.7.7.6	0003677||0003899||0006351||0046983	Q3A6M0					POR3G_02977-POR3G_contig_303.304	57	DNA-directed RNA polymerase, alpha subunit, bacterial and chloroplast-type		Poribacteria WGA-3G
contig_1280848_1_973_-	0.03	0.03	0.03	0.742419	1.00064	0.395621	0.257844	0.03	0.03	0.03	0.03	0.03	0.03	0.654441	0.187542	0.496733	0.288041	0.03	0.03	0.174881	0.03	0.500731	0.834777	0.217056	0.123528	-3.01709	0.138213	-2.85503	2615	973	324.333	ote:Oter_2054	groEL; chaperonin GroEL; K04077 chaperonin GroEL	ote03018	K04077	chaperonin GroEL	RNA degradation || Longevity regulating pathway - worm || Type I diabetes mellitus || Legionellosis || Tuberculosis		0005524||0044267	B1ZMQ9					Oter_2054-NC_010571	75	groEL; chaperonin GroEL; K04077 chaperonin GroEL	CAM_CRCL_36	Opitutus terrae PB90-1
contig_1281164_331_916_+	0.03	0.03	0.03	0.03	0.03	0.03	0.03	0.03	0.03	0.03	0.03	0.03	0.03	0.03	0.291584	0.288323	0.03	0.03	0.03	0.03	0.03	0.745608	0.834777	0.0547575	0.0423787	-4.56052	0.547871	-0.868093	916	586	195.333	amu:Amuc_1408	chaperonin GroEL; K04077 chaperonin GroEL	amu03018	K04077	chaperonin GroEL	RNA degradation || Longevity regulating pathway - worm || Type I diabetes mellitus || Legionellosis || Tuberculosis		0005524||0044267	B2UKV8					gi196233177-NZ_ABVL01000021	87	chaperonin GroEL	CAM_CRCL_36	Chthoniobacter flavus Ellin428
contig_1281710_1_342_+	0.03	0.03	0.03	0.03	0.03	0.03	0.03	0.03	0.03	0.03	0.03	0.03	0.03	0.03	0.03	0.03	0.03	0.03	0.03	0.854379	0.03	0.823063	0.834777	0.0692562	0.0496281	-4.3327	0.433175	-1.20698	972	342	114	pmi:PMT9312_0789 || pmg:P9301_08421	fructose-1,6-bisphosphate aldolase (EC:4.1.2.13); K01624 fructose-bisphosphate aldolase, class II [EC:4.1.2.13] || cbbA; fructose-1,6-bisphosphate aldolase (EC:4.1.2.13); K01624 fructose-bisphosphate aldolase, class II [EC:4.1.2.13]	pmg01110||pmg00710||pmg01120||pmg01100||pmg00030||pmg00010||pmg00680||pmg00051	K01624	fructose-bisphosphate aldolase, class II [EC:4.1.2.13]	Glycolysis / Gluconeogenesis || Pentose phosphate pathway || Fructose and mannose metabolism || Methane metabolism || Carbon fixation in photosynthetic organisms || Carbon metabolism || Biosynthesis of amino acids	4.1.2.13	0004332||0005975||0008270||0016832	A3PCJ0					P9301_08421-NC_009091	89	cbbA; fructose-1,6-bisphosphate aldolase (EC:4.1.2.13); K01624 fructose-bisphosphate aldolase, class II [EC:4.1.2.13]	CAM_CRCL_33626124	Prochlorococcus marinus str. MIT 9301
contig_1281940_148_1131_+	0.03	0.03	0.03	0.499637	0.797835	0.391534	0.03	0.03	0.03	0.03	0.03	0.03	0.03	0.03	0.185781	0.03	0.157578	0.03	0.03	0.03	0.03	0.648634	0.834777	0.119636	0.0748182	-3.74047	0.25076	-1.99562	1199	984	328														CAMPEP_0174945612-CAMNT_0016192999	59	TIGR03075: PQQ_enz_alc_DH: PQQ-dependent dehydrogenase, methanol/ethanol family PF01011.16: PQQ enzyme repeat PF13360.1: PQQ-like domain		Hemiselmis tepida
contig_1281950_1_638_-	0.03	0.03	0.03	0.03	0.03	0.03	0.03	0.03	0.03	0.03	0.03	0.03	0.03	0.03	0.03	0.03	0.03	0.03	0.03	0.250954	0.03	0.823063	0.834777	0.0405216	0.0352608	-4.82579	0.740345	-0.43373	638	638	212.667														CPCC7001_1657-NZ_DS990556	31	iron-sulfur cluster-binding protein	CAM_CRCL_4005492	Cyanobium PCC 7001
contig_1282362_369_1010_+	0.03	0.03	0.03	0.03	0.03	0.03	0.03	0.03	0.03	0.03	0.03	0.03	0.03	0.03	0.03	0.03	0.225541	0.229062	0.390088	0.03	0.03	0.698211	0.834777	0.0659377	0.0479688	-4.38176	0.454975	-1.13614	1282	642	214	pmm:PMM1509	fusA; elongation factor G (EC:3.6.5.3); K02355 elongation factor G		K02355	elongation factor G			0003924||0005525	Q7UZY6					PMM1509-NC_005072	96	fusA; elongation factor G (EC:3.6.5.3); K02355 elongation factor G	CAM_CRCL_32337882	Prochlorococcus marinus subsp. pastoris str. CCMP1986
contig_1282386_949_1752_-	0.03	0.03	0.03	0.31739	0.03	0.03	0.03	0.03	0.03	0.03	0.03	0.03	0.03	0.03	0.03	0.03	0.03	0.03	0.03	0.03	0.03	0.823063	0.834777	0.0436852	0.0368426	-4.76248	0.686731	-0.542183	1935	804	268	vha:VIBHAR_06262	hypothetical protein; K03286 OmpA-OmpF porin, OOP family		K03286	OmpA-OmpF porin, OOP family				A7N6I6					VIBHAR_06262-NC_009784	88	hypothetical protein; K03286 OmpA-OmpF porin, OOP family	CAM_CRCL_12856	Vibrio campbellii ATCC BAA-1116
contig_1282602_1_726_-	0.03	0.03	0.03	1.9396	0.810526	0.76502	0.335362	0.03	0.03	0.03	0.03	0.03	0.03	0.03	0.03	0.03	0.03	0.03	0.03	0.03	0.03	0.692127	0.834777	0.207643	0.118822	-3.07313	0.144479	-2.79107	726	726	242	amc:MADE_1006220	TonB-dependent receptor						0004872||0006810||0016020						amad1_05605-NC_019393	91	TonB-dependent receptor	CAM_CRCL_14732748	Alteromonas macleodii AltDE1
contig_1283933_1_468_+	0.03	0.03	0.03	0.03	0.03	0.03	0.03	0.03	0.03	0.03	0.03	0.03	0.03	0.03	0.03	0.03	0.03	0.03	0.03	0.331215	0.03	0.823063	0.834777	0.0443436	0.0371718	-4.74965	0.676535	-0.563763	468	468	156								0005524||0044267						PL1_0373-NZ_ADZY01000337	69	chaperonin GroEL-like protein	CAM_CRCL_36	Paenibacillus larvae subsp. larvae B-3650
contig_1284050_1_426_-	0.03	0.03	0.03	0.572397	0.473398	2.11773	0.550405	0.03	0.03	0.03	0.03	0.03	0.03	0.03	0.03	0.740691	0.03	0.03	0.03	0.03	0.03	0.666235	0.834777	0.234982	0.132491	-2.91603	0.127669	-2.96952	426	426	142	rpt:Rpal_0106	extracellular solute-binding protein family 5; K02035 peptide/nickel transport system substrate-binding protein	rpt02010	K02035	peptide/nickel transport system substrate-binding protein				B3Q639					Rpal_0106-NC_011004	68	family 5 extracellular solute-binding protein; K02035 peptide/nickel transport system substrate-binding protein	CAM_CRCL_28084	Rhodopseudomonas palustris TIE-1
contig_1285558_1_378_-	0.03	0.03	0.03	0.03	0.03	0.03	0.03	0.03	1.05445	0.03	0.03	0.03	0.03	0.03	0.03	0.03	0.03	0.03	0.03	0.03	0.03	0.823063	0.834777	0.0787833	0.0543916	-4.20047	0.380792	-1.39293	378	378	126	aby:ABAYE0640 || abn:AB57_3344 || abb:ABBFA_000621	Outer membrane protein precursor (OmpA-like); K03286 OmpA-OmpF porin, OOP family || outer membrane protein A; K03286 OmpA-OmpF porin, OOP family || outer membrane porin F precursor (Root adhesin); K03286 OmpA-OmpF porin, OOP family		K03286	OmpA-OmpF porin, OOP family				B7I876					gi494747170-NZ_BAEB01000031	99	membrane protein		Acinetobacter NBRC 100985
contig_12859_1_683_+	0.03	0.03	0.03	0.03	0.03	0.03	0.03	0.03	0.03	0.03	0.03	1.01641	0.03	0.03	0.03	0.03	0.397605	0.217113	0.03	0.442793	0.03	0.688571	0.834777	0.123044	0.076522	-3.70798	0.243815	-2.03614	837	683	227.667														CAMPEP_0199854024-CAMNT_0045754991	45			Favella taraikaensis, Strain Fe Narragansett Bay
contig_1286742_465_1002_-	1.67801	0.03	0.03	0.03	0.03	0.03	0.03	0.03	0.03	0.03	0.03	0.03	0.03	0.03	0.03	0.03	0.03	0.03	0.03	0.03	0.03	0.823063	0.834777	0.108477	0.0692383	-3.85229	0.276557	-1.85435	1003	538	179.333	vcn:VOLCADRAFT_98630	ucp3; hypothetical protein								KOG0753	Mitochondrial fatty acid anion carrier protein/Uncoupling protein	Energy production and conversion	METABOLISM	CAMPEP_0198638862-CAMNT_0044373863	92	PF00153.22: Mitochondrial carrier protein		Phaeocystis cordata
contig_1287786_300_924_+	0.03	0.03	0.03	0.03	0.03	0.03	0.03	0.03	0.03	0.03	0.03	0.389318	0.03	0.354043	0.275261	0.514407	0.03	0.64343	0.03	1.8344	0.03	0.653237	0.834777	0.212422	0.121211	-3.04441	0.141228	-2.8239	924	625	208.333								0006810||0030288						P24_07226-GCA_000299935.1_contig6	55	TRAP dicarboxylate transporter subunit DctP		Oceanibaculum indicum P24
contig_1288682_42_1001_+	0.03	0.03	0.03	0.270689	0.03	0.03	0.03	0.03	0.03	0.03	0.03	0.03	0.03	0.03	0.03	0.03	0.03	0.03	0.03	0.03	0.03	0.823063	0.834777	0.0414614	0.0357307	-4.80669	0.723565	-0.466805	1113	960	320														KQS_05630-NC_017025	90	sucC; succinyl-CoA synthetase subunit beta (EC:6.2.1.5)		Flavobacterium indicum GPTSA100-9
contig_1290084_1_458_-	0.03	0.03	0.03	0.03	0.03	0.03	0.03	0.03	0.03	0.03	0.03	0.03	0.03	0.03	0.03	0.03	0.03	0.03	0.03	0.337792	0.03	0.823063	0.834777	0.0446568	0.0373284	-4.74358	0.671791	-0.573916	458	458	152.667	pub:SAR11_0162	groEL; 60 kDa chaperonin; K04077 chaperonin GroEL	pub03018	K04077	chaperonin GroEL	RNA degradation || Longevity regulating pathway - worm || Type I diabetes mellitus || Legionellosis || Tuberculosis		0005524||0044267	Q4FPA5					PB7211_1188-NZ_DS995298	90	chaperonin GroL	CAM_CRCL_32430158	Pelagibacter HTCC7211
contig_1290411_1_502_-	0.03	0.03	0.03	0.03	0.03	0.03	0.03	0.03	0.03	0.03	0.03	0.477358	0.03	0.03	0.03	0.03	0.530148	0.539155	0.03	0.310814	0.03	0.63676	0.834777	0.112737	0.0713685	-3.80857	0.266106	-1.90993	502	502	167.333														CAMPEP_0189648156-CAMNT_0033314585	46			Kryptoperidinium foliaceum CCMP1326
contig_1290550_1_435_-	0.03	0.03	0.03	0.03	0.898448	0.847815	0.539638	0.03	0.92021	0.03	0.03	0.03	0.03	0.03	0.03	0.377994	0.03	0.03	0.03	0.354066	0.03	0.564771	0.834777	0.208961	0.11948	-3.06516	0.143568	-2.8002	516	435	145	jan:Jann_2943	TRAP dicarboxylate transporter-DctP subunit							Q28N52					A33M_0090-GCA_000293785.1_contig10	54	TRAP-type C4-dicarboxylate transport system, periplasmic component		Rhodovulum PH10
contig_1290568_1159_2049_+	0.03	0.03	0.03	0.289328	0.45399	0.229635	0.278813	0.03	0.464615	0.453408	0.461298	0.534093	0.577125	0.484606	0.374081	0.199896	0.170895	0.460296	0.289457	0.504643	0.03	0.143751	0.834777	0.303628	0.166814	-2.58369	0.0988053	-3.33927	2998	891	297	mca:MCA1059 || mca:MCA2374	tuf-1, tuf; elongation factor Tu (EC:3.6.5.3); K02358 elongation factor Tu || tuf-2, tuf; elongation factor Tu (EC:3.6.5.3); K02358 elongation factor Tu		K02358	elongation factor Tu			0003924||0005525	Q605B0					POR3G_03001-POR3G_contig_303.304	67	translation elongation factor TU		Poribacteria WGA-3G
contig_1290648_1_267_+	3.35071	0.03	0.03	0.03	0.03	0.03	0.03	0.03	0.03	1.44295	1.46927	0.03	0.03	0.788528	0.03	0.03	1.91071	0.03	1.76166	0.03	1.20174	0.49562	0.834777	0.587884	0.894812	-0.160344	2.04418	1.03152	362	267	89								16020						HIMB5_00002180-NC_018643	72	Bacteriorhodopsin-like protein		alpha proteobacterium HIMB5
contig_1290953_309_704_-	0.03	0.03	0.03	7.03185	5.27687	4.97097	7.30779	0.03	9.80883	9.55669	9.7342	1.16421	1.26103	4.12145	2.35255	6.14625	2.88312	6.80716	5.28401	10.7095	6.35029	0.656541	0.834777	4.80413	5.57721	2.47954	1.32184	0.402548	704	396	132	apb:SAR116_0451	glutamate/glutamine/aspartate/asparagine ABC transporter periplasmic substrate-binding protein (EC:4.2.1.51); K09969 general L-amino acid transport system substrate-binding protein	apb02010	K09969	general L-amino acid transport system substrate-binding protein	ABC transporters			D5BQY0					SAR116_0451-NC_014010	72	glutamate/glutamine/aspartate/asparagine ABC transporter periplasmic substrate-binding protein (EC:4.2.1.51); K09969 general L-amino acid transport system substrate-binding protein	CAM_CRCL_3107	Puniceispirillum marinum IMCC1322
contig_1291060_73_907_+	0.03	0.03	0.03	0.03	0.256212	0.03	0.2955	0.03	0.03	0.03	0.03	0.03	0.03	0.272547	0.03	0.21129	0.180344	0.183051	0.03	0.03	0.03	0.540244	0.834777	0.088045	0.0590225	-4.08259	0.340735	-1.55328	907	835	278.333								0006810||0030288						GNIT_0115-NC_016041	32	TRAP dicarboxylate transporter subunit DctP		Glaciecola nitratireducens FR1064
contig_1291497_1_711_-	0.03	0.03	0.03	0.03	0.295664	0.280176	0.03	0.03	0.03	0.03	0.03	0.345856	0.03	0.03	0.245595	0.03	0.03	0.03	0.03	0.228268	0.03	0.5828	0.834777	0.0893124	0.0596562	-4.06718	0.3359	-1.5739	918	711	237	csy:CENSYa_0406	translation elongation factor EF-1alpha (EC:3.6.5.3); K03231 elongation factor 1-alpha		K03231	elongation factor 1-alpha	RNA transport || Legionellosis		0003924||0005525						AAA07O23_00343-AAA07O23_contig_66_0.32	95	translation elongation factor 1A (EF-1A/EF-Tu)		Thaumarchaeota archaeon SCGC AAA007-O23
contig_1291707_1_432_-	2.08238	0.03	0.03	0.564864	0.03	0.03	0.03	0.03	0.03	0.03	0.03	0.03	0.03	0.03	0.03	0.03	2.35476	0.03	0.03	0.356317	0.03	0.698396	0.834777	0.279444	0.154722	-2.69225	0.107356	-3.21953	432	432	144	pmm:PMM0970	urtA; putative UreA ABC transporter, substrate binding protein; K11959 urea transport system substrate-binding protein	pmm02010	K11959	urea transport system substrate-binding protein	ABC transporters			Q7V1A9					PMM0970-NC_005072	97	urtA; putative UreA ABC transporter, substrate binding protein; K11959 urea transport system substrate-binding protein	CAM_CRCL_32473727	Prochlorococcus marinus subsp. pastoris str. CCMP1986
contig_1292122_1_862_-	0.03	0.03	0.03	0.03	0.249127	0.03	0.287184	0.03	0.479236	0.905306	0.03	0.03	0.03	0.26495	0.03	0.381223	0.175635	0.03	0.03	0.193537	0.03	0.548695	0.834777	0.15839	0.0941952	-3.4082	0.189405	-2.40045	1528	862	287.333	amu:Amuc_1408	chaperonin GroEL; K04077 chaperonin GroEL	amu03018	K04077	chaperonin GroEL	RNA degradation || Longevity regulating pathway - worm || Type I diabetes mellitus || Legionellosis || Tuberculosis		0005524||0044267	B2UKV8					ORF01611-TG_gvs_533	81	chaperonin GroL	CAM_CRCL_36	Verrucomicrobium spinosum DSM 4136
contig_1293901_1_1001_+	0.03	0.03	0.03	4.64661	4.74747	5.53861	4.90237	1.79958	4.67226	2.66816	4.25292	2.27349	4.65651	3.87417	3.55211	3.5082	1.53494	1.81738	0.722836	0.03	0.03	0.172069	0.834777	2.63417	1.33209	0.413687	0.0113888	-6.45624	1002	1001	333.667	syg:sync_1542	porin						0005215||0006810||0016021	Q0I9X5					gi88808397-NZ_AAOK01000003	70	putative porin	CAM_CRCL_32545020	Synechococcus WH 7805
contig_1294104_83_355_-	0.03	0.03	0.03	0.03	0.03	0.03	0.03	0.03	0.03	0.03	0.03	0.03	0.03	0.03	0.591495	1.69349	0.949686	0.498124	0.03	0.03	0.03	0.674592	0.834777	0.202038	0.116019	-3.10757	0.148487	-2.75159	1313	273	91	bge:BC1002_1458	histone family protein DNA-binding protein; K03530 DNA-binding protein HU-beta		K03530	DNA-binding protein HU-beta			3677	D5W7Y8					B020DRAFT_00671-B020DRAFT_scaffold_121.122	77	Bacterial nucleoid DNA-binding protein	CAM_CRCL_92	Burkholderia JPY251
contig_1294188_27_719_+	0.03	0.03	0.03	0.363422	0.03	0.543347	0.03	0.03	0.03	0.03	0.03	0.67812	0.03	0.322247	0.47239	0.03	0.754601	0.767651	0.363588	0.843673	0.03	0.431667	0.834777	0.26043	0.145215	-2.78374	0.115194	-3.11786	1034	693	231	cow:Calow_1407	flagellin domain-containing protein; K02406 flagellin	cow02040||cow02020	K02406	flagellin	Two-component system || Flagellar assembly || Plant-pathogen interaction || Salmonella infection || Legionellosis		0005198||0009288||0071973	E4Q2T8					JCVI_PEP_metagenomic.orf.1126664270484.1-SAR324	57		CAM_CRCL_34374	SAR324 cluster bacterium JCVI-SC AAA005
contig_1294257_130_751_+	0.03	0.03	0.03	0.03	0.03	0.03	0.03	0.03	0.03	0.03	0.03	0.03	0.03	0.03	0.03	0.03	0.231828	0.03	0.03	0.03	0.03	0.823063	0.834777	0.0396109	0.0348054	-4.84454	0.757368	-0.400934	751	622	207.333	pmh:P9215_17061	atpD; F0F1 ATP synthase subunit beta (EC:3.6.3.14); K02112 F-type H+-transporting ATPase subunit beta [EC:3.6.3.14]	pmh00190||pmh01100||pmh00195	K02112	F-type H+-transporting ATPase subunit beta [EC:3.6.3.14]	Oxidative phosphorylation || Photosynthesis	3.6.3.14	0005524||0015992||0046034	A8G6T8					gi488894260-NZ_DS999537	88	F0F1 ATP synthase subunit beta	CAM_CRCL_22	Prochlorococcus marinus str. MIT 9202
contig_1294462_1_548_+	0.03	0.03	0.03	0.03	0.03	0.03	0.03	0.03	0.03	0.03	0.03	0.03	0.03	0.03	0.309723	0.03	0.259082	0.03	0.451855	0.544485	0.03	0.646892	0.834777	0.0988164	0.0644082	-3.95661	0.303593	-1.71979	832	548	182.667	mes:Meso_1819	rpoB; DNA-directed RNA polymerase subunit beta (EC:2.7.7.6); K03043 DNA-directed RNA polymerase subunit beta [EC:2.7.7.6]	mes03020||mes00230||mes01100||mes00240	K03043	DNA-directed RNA polymerase subunit beta [EC:2.7.7.6]	Purine metabolism || Pyrimidine metabolism || RNA polymerase	2.7.7.6	0003677||0003899||0006351	Q11HB3					Meso_1819-NC_008254	74	rpoB; DNA-directed RNA polymerase subunit beta (EC:2.7.7.6); K03043 DNA-directed RNA polymerase subunit beta [EC:2.7.7.6]	CAM_CRCL_1562	Chelativorans BNC1
contig_1294519_1_776_+	0.03	0.03	0.03	0.625519	0.273412	0.48844	0.315686	0.03	0.03	0.03	0.03	0.608798	0.344103	0.551976	0.425073	0.810295	0.03	0.524064	0.625815	0.393322	0.03	0.299476	0.834777	0.297929	0.163964	-2.60855	0.100695	-3.31193	776	776	258.667	swi:Swit_1081	TonB-dependent receptor						0004872||0006810||0016020	A5V581					jcvi:NT01SARS0677-Contig_0_sar86_1	41	putative TonB-dependent receptor	CAM_CRCL_61165	uncultured SAR86 cluster bacterium
contig_1294785_1_1048_-	0.03	0.03	0.03	0.03	0.03	0.03	0.03	0.03	0.03	0.03	0.03	0.03	0.03	0.03	0.03	0.03	0.149787	0.151945	0.03	0.03	0.03	0.745614	0.834777	0.041511	0.0357555	-4.80569	0.722699	-0.468533	1049	1048	349.333	ctt:CtCNB1_4165	twin-arginine translocation pathway signal						0006810||0030288	D0J7H9					gi149928372-NZ_ABCT01000025	87	trap dicarboxylate transporter- dctp subunit	CAM_CRCL_2967	Limnobacter MED105
contig_1294824_368_835_+	0.03	0.03	0.03	0.03	0.03	0.03	0.03	0.03	0.03	0.03	0.03	0.03	0.03	0.46275	0.03	0.03	0.03	0.576145	5.46363	0.03	0.03	0.791623	0.834777	0.335358	0.182679	-2.45262	0.0894565	-3.48267	1109	468	156	tps:THAPSDRAFT_270092	hypothetical protein							B8CFP9					CAMPEP_0118828584-CAMNT_0006759611	97	PF00504.16: Chlorophyll A-B binding protein		Phaeocystis sp. CCMP2710
contig_1295054_1_967_-	0.03	0.03	0.03	0.03	0.03	0.03	0.03	0.03	0.03	0.03	0.03	0.03	0.282062	0.03	0.03	0.03	0.03	0.03	0.03	0.17578	0.03	0.754769	0.834777	0.0489448	0.0394724	-4.66301	0.612935	-0.706194	1025	967	322.333	rrs:RoseRS_1736	heat repeat-containing PBS lyase							A5UU23					or1625-POR4E_contig00324standard	31	hypothetical protein		Poribacteria WGA-4E
contig_1296194_2052_2810_+	0.03	0.03	0.03	0.334428	0.77659	1.20177	0.61417	0.03	0.03	0.03	0.03	0.325881	0.03	0.03	0.231961	0.229443	0.03	0.03	0.03	0.03	0.03	0.583745	0.834777	0.196869	0.113434	-3.14007	0.152386	-2.7142	3191	759	253														gi498193603-NZ_AFHZ01000074	86	sugar ABC transporter substrate-binding protein		gamma proteobacterium SCGC AAA001-B15
contig_1296194_967_1545_-	0.03	0.03	0.03	0.03	1.66115	1.56605	0.795778	0.03	0.03	0.03	0.03	0.03	0.03	0.03	0.03	0.291446	0.03	0.03	0.03	0.03	0.03	0.677286	0.834777	0.229735	0.129867	-2.94489	0.130585	-2.93693	3191	579	193	ret:RHE_PD00087 || rec:RHECIAT_PB0000112	rbsBd; ribose ABC transporter, substrate-binding protein || rbsBb; ribose ABC transporter, substrate-binding protein							B3Q2B9					gi498193603-NZ_AFHZ01000074	87	sugar ABC transporter substrate-binding protein		gamma proteobacterium SCGC AAA001-B15
contig_1296616_174_801_-	0.03	0.03	0.03	0.765864	0.03	0.03	0.03	0.03	0.03	0.03	0.03	0.03	0.03	0.03	0.03	0.03	0.03	0.03	0.03	0.03	0.03	0.823063	0.834777	0.0650411	0.0475206	-4.3953	0.461247	-1.11639	801	628	209.333	pmg:P9301_12201	two-component response regulator						0000160||0003677||0006355	A3PDL8					P9301_12201-NC_009091	100	two-component response regulator	CAM_CRCL_4029809	Prochlorococcus marinus str. MIT 9301
contig_1296895_1_740_+	0.03	0.03	0.03	0.03	0.285253	0.270371	0.03	0.03	0.03	0.03	0.03	0.03	0.03	0.57737	0.237146	0.439128	0.03	0.03	0.03	0.03	0.03	0.609229	0.834777	0.109013	0.0695064	-3.84671	0.275197	-1.86146	783	740	246.667	pde:Pden_2151	polyamine ABC transporter, periplasmic polyamine-binding protein; K02055 putative spermidine/putrescine transport system substrate-binding protein		K02055	putative spermidine/putrescine transport system substrate-binding protein				A1B3Z9					gi89069209-NZ_AAOT01000014	43	hypothetical protein	CAM_CRCL_33245214	Oceanicola granulosus HTCC2516
contig_1296950_1_318_+	0.03	0.03	0.03	0.03	0.03	0.03	0.03	0.03	0.03	0.03	0.03	0.03	0.03	0.03	0.03	0.03	0.424771	0.43188	0.756969	0.03	0.03	0.698211	0.834777	0.102553	0.0662767	-3.91535	0.292531	-1.77334	671	318	106	pmm:PMM0988	helix-hairpin-helix DNA-binding motif-containing protein							Q7V193					PMM0988-NC_005072	74	helix-hairpin-helix DNA-binding motif-containing protein	CAM_CRCL_2848	Prochlorococcus marinus subsp. pastoris str. CCMP1986
contig_1297567_252_626_-	0.03	0.03	0.03	0.03	0.03	0.03	0.03	0.03	0.03	0.03	0.03	0.03	0.03	0.570072	0.03	0.837345	0.03	0.370795	0.03	0.405917	0.03	0.652084	0.834777	0.128292	0.0791459	-3.65934	0.233842	-2.09639	626	375	125	fri:FraEuI1c_3135	putative mono-oxygenase YdhR							E3JD16					K288DRAFT_02359-K288DRAFT_scaffold00246.246	53	Putative mono-oxygenase ydhR		Bradyrhizobium Ai1a-2
contig_1297732_1_599_+	0.03	0.03	0.03	0.03	0.03	0.326953	0.400105	0.03	0.03	0.03	0.03	0.03	0.03	0.368108	0.03	0.282716	0.03	0.03	0.03	0.03	0.03	0.631734	0.834777	0.0898992	0.0599496	-4.06011	0.333707	-1.58335	599	599	199.667	rli:RLO149_c003720	dctP2; TRAP transporter subunit DctP						0006810||0030288						VHA_003020-NZ_ADAQ01000013	77	TRAP-type C4-dicarboxylate transport system component	CAM_CRCL_4000272	Grimontia hollisae CIP 101886
contig_1297864_55_687_-	0.03	0.03	0.03	1.4901	1.8204	0.873009	2.13135	1.42917	2.47702	1.81795	1.85126	1.80388	1.18519	1.62974	0.756484	0.98657	0.624963	2.8565	2.22124	5.15209	1.01848	0.644734	0.834777	1.53407	1.27627	0.351938	0.663909	-0.590942	792	633	211	apb:SAR116_0451	glutamate/glutamine/aspartate/asparagine ABC transporter periplasmic substrate-binding protein (EC:4.2.1.51); K09969 general L-amino acid transport system substrate-binding protein	apb02010	K09969	general L-amino acid transport system substrate-binding protein	ABC transporters			D5BQY0					SAR116_0451-NC_014010	75	glutamate/glutamine/aspartate/asparagine ABC transporter periplasmic substrate-binding protein (EC:4.2.1.51); K09969 general L-amino acid transport system substrate-binding protein	CAM_CRCL_3107	Puniceispirillum marinum IMCC1322
contig_1297978_1_547_-	0.03	0.03	0.03	0.03	0.03	0.03	0.03	0.03	0.03	0.03	0.732534	0.03	0.03	0.03	0.03	0.03	0.259501	0.03	0.03	0.287713	0.03	0.725136	0.834777	0.0866547	0.0583273	-4.09968	0.346202	-1.53031	964	547	182.333	rpf:Rpic12D_0843	signal peptide protein; K09924 hypothetical protein		K09924	uncharacterized protein				C6BEV7					Rpic12D_0843-NC_012856	100	signal peptide protein; K09924 hypothetical protein	CAM_CRCL_4274253	Ralstonia pickettii 12D
contig_1298243_1_715_-	0.03	0.03	0.03	0.353163	0.558356	0.278776	0.03	0.03	0.03	0.03	0.03	0.344089	0.03	0.313254	0.03	0.241716	0.03	0.03	0.03	0.03	0.03	0.553948	0.834777	0.120922	0.0754608	-3.72813	0.248095	-2.01104	1229	715	238.333	sur:STAUR_5685	groL2; 60 kda chaperonin, GroEL protein 2; K04077 chaperonin GroEL	sur03018	K04077	chaperonin GroEL	RNA degradation || Longevity regulating pathway - worm || Type I diabetes mellitus || Legionellosis || Tuberculosis		0005524||0044267	E3FUC9					JCVI_PEP_metagenomic.orf.1126664251942.1-SAR324	83		CAM_CRCL_36	SAR324 cluster bacterium JCVI-SC AAA005
contig_1298515_1_725_-	1.25294	0.03	0.03	0.03	0.03	0.03	0.03	0.03	0.03	0.03	0.03	0.03	0.03	0.03	0.03	0.03	0.03	0.03	0.03	0.03	0.461523	0.194368	0.834777	0.108784	0.285154	-1.81019	4.24257	2.08494	725	725	241.667	pub:SAR11_0625	bacteriorhodopsin						16020	Q4FMZ3					PB7211_669-NZ_DS995298	79	bacteriorhodopsin	CAM_CRCL_33385117	Pelagibacter HTCC7211
contig_1298704_1_558_+	0.03	0.03	0.03	0.03	0.03	0.03	0.03	0.03	0.03	0.03	0.03	0.03	0.03	0.03	0.03	0.03	0.03	0.259029	0.03	0.787897	0.03	0.777429	0.834777	0.0769965	0.0534982	-4.22437	0.389628	-1.35983	558	558	186	ppw:PputW619_0968	groEL; chaperonin GroEL; K04077 chaperonin GroEL	ppw03018	K04077	chaperonin GroEL	RNA degradation || Longevity regulating pathway - worm || Type I diabetes mellitus || Legionellosis || Tuberculosis		0005524||0044267	B1J3K5					PputW619_0968-NC_010501	63	groEL; chaperonin GroEL; K04077 chaperonin GroEL	CAM_CRCL_36	Pseudomonas putida W619
contig_1298730_1_595_-	0.03	0.03	0.03	0.03	0.03	0.926848	0.03	0.03	0.03	0.03	0.03	0.03	0.03	0.03	0.03	0.03	0.03	0.03	0.03	0.03	0.03	0.823063	0.834777	0.072707	0.0513535	-4.28339	0.412615	-1.27713	2126	595	198.333	vex:VEA_001905	glutamine synthetase type I (EC:6.3.1.2); K01915 glutamine synthetase [EC:6.3.1.2]	vex01120||vex01100||vex00910||vex02020||vex00330||vex00250	K01915	glutamine synthetase [EC:6.3.1.2]	Arginine biosynthesis || Alanine, aspartate and glutamate metabolism || Glyoxylate and dicarboxylate metabolism || Nitrogen metabolism || Biosynthesis of amino acids || Two-component system || Glutamatergic synapse || GABAergic synapse	6.3.1.2	0004356||0006542||0006807	A7K0W2					VME_01980-NZ_ACZC01000002	98	glutamate--ammonia ligase	CAM_CRCL_784	Vibrio harveyi 1DA3
contig_1299089_195_758_-	0.03	0.03	0.03	0.03	0.03	0.345381	0.423072	0.03	1.4032	0.698895	0.03	2.0209	1.32651	0.74818	0.03	0.298399	0.03	0.483184	0.03	0.03	0.03	0.517679	0.834777	0.386082	0.208041	-2.26506	0.0777037	-3.68587	758	564	188														CAMPEP_0179421392-CAMNT_0021195211	61			Geminigera cryophila, Strain CCMP2564
contig_1299093_937_1545_-	0.03	0.03	0.03	1.16823	0.03	0.03	0.03	0.03	0.03	0.03	0.03	0.03	0.03	0.03	0.03	0.03	0.03	0.03	0.03	0.03	0.03	0.823063	0.834777	0.0842015	0.0571008	-4.13035	0.356288	-1.48888	1695	609	203								0003676||0005524						AMBAS45_02885-NC_018679	100	ATP-dependent RNA helicase		Alteromonas macleodii str. 'Balearic Sea AD45'
contig_1299144_1_1044_+	0.03	0.03	0.03	0.03	0.03	0.03	0.03	0.03	0.03	0.03	0.03	0.03	0.03	0.03	0.03	0.174997	0.03	0.152412	0.03	0.03	0.03	0.746565	0.834777	0.0427338	0.0363669	-4.78123	0.702021	-0.510414	1045	1044	348	mmw:Mmwyl1_4464	ATP synthase F1 subunit alpha (EC:3.6.3.14); K02111 F-type H+-transporting ATPase subunit alpha [EC:3.6.3.14]	mmw00190||mmw01100	K02111	F-type H+-transporting ATPase subunit alpha [EC:3.6.3.14]	Oxidative phosphorylation || Photosynthesis	3.6.3.14	0000275||0005524||0015986||0015991||0016820||0033178||0045261||0045262||0046933	A6W3T0					gi87121035-NZ_AANE01000009	100	ATP synthase F1, alpha subunit	CAM_CRCL_33026284	Marinomonas MED121
contig_1299246_1_304_-	0.03	0.03	0.03	0.03	0.03	0.03	0.03	0.03	0.03	0.03	0.03	0.03	0.03	0.03	0.03	0.03	0.855902	0.870776	0.03	0.03	0.03	0.745614	0.834777	0.109366	0.0696828	-3.84305	0.274309	-1.86613	304	304	101.333								0004618||0006096		KOG1367	3-phosphoglycerate kinase	Carbohydrate transport and metabolism	METABOLISM	CAMPEP_0197942790-CAMNT_0043566047	90	PF00162.14: Phosphoglycerate kinase		Gonyaulax spinifera, Strain CCMP409
contig_1299256_295_897_-	0.03	0.03	0.03	0.03	0.03	0.03	0.03	0.03	0.03	0.03	0.03	0.03	0.03	0.03	0.03	0.03	0.238188	0.03	0.03	0.03	0.03	0.823063	0.834777	0.0399137	0.0349568	-4.83828	0.751622	-0.411921	1115	603	201														CAMPEP_0190376344-CAMNT_0034126343	51			Oxyrrhis marina
contig_1299328_1_661_+	0.03	0.03	0.03	0.379563	0.88728	0.568199	0.70078	0.03	1.20168	0.03	0.03	1.04924	0.767501	0.642789	2.11713	1.17506	0.59976	0.803361	0.379737	1.73613	0.03	0.299328	0.834777	0.629439	0.32972	-1.60069	0.0476615	-4.39103	661	661	220.333	apb:SAR116_1391	glycine betaine ABC transporter substrate-binding protein (EC:1.1.1.103); K02002 glycine betaine/proline transport system substrate-binding protein	apb02010	K02002	glycine betaine/proline transport system substrate-binding protein	ABC transporters		0005215||0006810	D5BTN7					gi114769692-NZ_AATR01000002	66	substrate-binding region of ABC-type glycine betaine transport system	CAM_CRCL_2583	Rhodobacterales bacterium HTCC2255
contig_1299467_42_908_-	0.03	0.03	0.03	0.03	0.03	0.235161	0.03	0.03	0.03	0.03	0.03	0.03	0.03	0.03	0.03	0.03	0.03	0.03	0.03	0.03	0.03	0.823063	0.834777	0.0397696	0.0348848	-4.84126	0.754345	-0.406703	2961	867	289	vvu:VV1_1860 || vvy:VV2556 || vvm:VVM_01477	tsf; elongation factor Ts; K02357 elongation factor Ts || tsf; elongation factor Ts; K02357 elongation factor Ts || translation elongation factor Ts; K02357 elongation factor Ts		K02357	elongation factor Ts			0003746||0005515||0005622||0006414	Q8DBG0					VFA_000874-NZ_ACZP01000012	91	translation elongation factor Ts	CAM_CRCL_4006981	Vibrio furnissii CIP 102972
contig_1300130_1_682_+	0.03	0.03	0.03	0.03	0.03	0.290813	0.03	0.03	0.03	0.03	0.03	0.03	0.03	0.03	0.254763	0.251961	0.03	0.217387	0.03	0.236699	0.03	0.579143	0.834777	0.0824582	0.0562291	-4.15254	0.363821	-1.4587	780	682	227.333	sus:Acid_1046	HpcH/HpaI aldolase						3824	Q02A82					CAMPEP_0186761928-CAMNT_0029641593	77	TIGR02311: HpaI: 2,4-dihydroxyhept-2-ene-1,7-dioic acid aldolase PF03328.9: HpcH/HpaI aldolase/citrate lyase family		Azadinium spinosum 3D9
contig_1300209_1_842_-	0.03	0.03	0.03	4.96955	4.74097	3.6213	5.03257	1.08187	1.86963	2.27024	1.39919	2.16372	2.92482	2.19478	2.94284	2.18739	1.22275	1.85135	0.853668	2.3739	1.14468	0.498258	0.834777	2.13977	1.64223	0.715654	0.534956	-0.902509	936	842	280.667								0005215||0006810						HIMB5_00009410-NC_018643	74	ligand-binding protein, OpuAC family		alpha proteobacterium HIMB5
contig_1300289_1_709_+	0.03	0.03	0.03	0.03	0.03	0.03	0.03	0.03	0.03	0.03	0.03	0.03	0.03	0.03	0.03	0.03	0.03	0.03	0.35606	0.03	0.03	0.823063	0.834777	0.0455267	0.0377633	-4.72687	0.658955	-0.601749	1106	709	236.333	pmi:PMT9312_0497	RNA polymerase sigma factor RpoD; K03086 RNA polymerase primary sigma factor		K03086	RNA polymerase primary sigma factor			0003677||0003700||0006352||0006355||0016987	Q31C37					PMT9312_0497-NC_007577	99	RNA polymerase sigma factor RpoD; K03086 RNA polymerase primary sigma factor	CAM_CRCL_31972758	Prochlorococcus marinus str. MIT 9312
contig_1300527_1_1106_-	0.03	0.03	0.03	0.238916	0.03	0.03	0.03	0.03	0.03	0.03	0.03	0.4361	0.250383	0.03	0.03	0.03	0.03	0.03	0.03	0.03	0.03	0.700042	0.834777	0.069781	0.0498905	-4.32509	0.429917	-1.21787	1107	1106	368.667														CAMPEP_0200789706-CAMNT_0046946587	61	TIGR02169: SMC_prok_A: chromosome segregation protein SMC		Karlodinium micrum, Strain CCMP2283
contig_1300645_241_618_-	0.03	0.03	0.03	0.03	0.529702	0.03	0.03	0.03	0.03	0.03	0.03	0.03	0.03	1.63736	0.435524	0.430469	0.362109	1.38236	0.03	0.03	0.857657	0.212586	0.834777	0.288342	0.572999	-0.803394	2.97445	1.57262	944	378	126	apb:SAR116_2101	nitrate/sulfonate/bicarbonate ABC transporter periplasmic-like protein (EC:1.3.3.4); K02051 sulfonate/nitrate/taurine transport system substrate-binding protein	apb02010	K02051	NitT/TauT family transport system substrate-binding protein				D5BNF1					SAR116_2101-NC_014010	65	nitrate/sulfonate/bicarbonate ABC transporter periplasmic-like protein (EC:1.3.3.4); K02051 sulfonate/nitrate/taurine transport system substrate-binding protein	CAM_CRCL_4000580	Puniceispirillum marinum IMCC1322
contig_1300683_1_415_-	0.03	0.03	0.03	0.03	0.03	0.03	0.03	0.03	0.03	0.03	0.03	0.03	0.03	0.03	0.768738	0.394764	0.03	0.03	0.03	0.03	0.03	0.759891	0.834777	0.0825477	0.0562739	-4.15139	0.363426	-1.46027	693	415	138.333	pgv:SL003B_1323	Peptide ABC transporter, solute-binding protein						0006810||0030288						PB7211_972-NZ_DS995298	77	bacterial extracellular solute-binding protein, family 7	CAM_CRCL_14052498	Pelagibacter HTCC7211
contig_1300908_1_501_+	0.03	0.03	0.03	0.03	0.03	0.03	0.03	0.03	0.03	0.03	0.03	0.03	0.03	0.03	0.335964	0.03	0.03	0.03	0.03	0.03	0.03	0.823063	0.834777	0.0445697	0.0372849	-4.74527	0.673103	-0.571102	501	501	167								16020						SGRA_0782-NC_016940	44	hypothetical protein		Saprospira grandis str. Lewin
contig_1301201_1_662_+	0.03	0.03	0.03	1.77518	2.31263	2.17954	2.37418	0.03	0.614957	0.03	0.03	1.38694	1.50277	0.641864	0.956213	0.944666	0.409266	0.802193	0.03	0.03	0.03	0.365324	0.834777	0.770019	0.40001	-1.32189	0.0389601	-4.68186	662	662	220.667	nca:Noca_3541	basic membrane lipoprotein						5886	A1SMK6					Noca_3541-NC_008699	56	basic membrane lipoprotein	CAM_CRCL_27840	Nocardioides JS614
contig_1301275_1_497_-	0.03	0.03	0.03	0.03	0.03	0.03	0.03	0.03	0.03	0.03	0.03	0.03	0.03	0.03	0.03	0.334582	0.28259	0.287139	0.495143	1.16456	0.03	0.661638	0.834777	0.144953	0.0874765	-3.51496	0.206964	-2.27255	497	497	165.667	pgv:SL003B_0835	ABC branched amino acid transporter family, periplasmic substrate-binding subunit; K01999 branched-chain amino acid transport system substrate-binding protein	pgv02010	K01999	branched-chain amino acid transport system substrate-binding protein	ABC transporters								gi159182170-ABHC01000001	60	hypothetical protein	CAM_CRCL_15378	alpha proteobacterium BAL199
contig_1301304_21_294_-	0.03	0.03	0.03	0.03	0.03	0.03	0.03	0.03	0.03	0.03	0.03	0.03	0.03	0.03	0.03	0.03	0.488165	0.496416	0.873709	0.03	0.03	0.698211	0.834777	0.114204	0.0721021	-3.79381	0.262687	-1.92858	294	274	91.3333	apb:SAR116_0125	histone family protein DNA-binding protein (EC:5.4.99.12); K03530 DNA-binding protein HU-beta		K03530	DNA-binding protein HU-beta			3677	D5BP86					SAR116_0125-NC_014010	78	histone family protein DNA-binding protein (EC:5.4.99.12); K03530 DNA-binding protein HU-beta	CAM_CRCL_92	Puniceispirillum marinum IMCC1322
contig_1301388_1_740_+	0.03	0.03	0.03	0.03	0.03	0.03	0.03	0.03	0.03	0.03	0.03	0.03	0.03	0.03	0.237146	0.234564	0.03	0.3754	0.654801	0.410997	0.452776	0.0789011	0.834777	0.13408	0.293428	-1.76892	3.37691	1.7557	740	740	246.667	rba:RB10629	groEL; heat shock protein GroEL; K04077 chaperonin GroEL	rba03018	K04077	chaperonin GroEL	RNA degradation || Longevity regulating pathway - worm || Type I diabetes mellitus || Legionellosis || Tuberculosis		0005524||0044267	Q7TTY9					gi87309070-NZ_AANZ01000011	85	chaperonin GroL	CAM_CRCL_32430158	Blastopirellula marina DSM 3645
contig_1301604_1_879_-	0.03	0.03	1.9377	0.03	0.03	0.03	0.03	0.03	0.03	0.03	0.03	0.03	0.307297	0.260406	0.03	0.03	0.172818	0.03	0.292999	0.03	0.03	0.741381	0.834777	0.164344	0.0971718	-3.36332	0.182544	-2.45368	1095	879	293								0006886||0016192		KOG0985	Vesicle coat protein clathrin, heavy chain	Intracellular trafficking, secretion, and vesicular transport	CELLULAR PROCESSES AND SIGNALING	CAMPEP_0171084254-CAMNT_0011541743	88	PF00637.15: Region in Clathrin and VPS PF07719.12: Tetratricopeptide repeat		Gambierdiscus australes
contig_1302411_1_989_-	0.03	0.03	0.03	0.03	0.03	0.03	0.03	0.03	0.03	0.03	0.03	0.03	0.03	0.03	0.03	0.03	0.03	0.03	0.03	0.172537	0.03	0.823063	0.834777	0.0367875	0.0333937	-4.90428	0.815495	-0.294252	2111	989	329.667	syr:SynRCC307_2475	tauA; ABC-type nitrate/sulfonate/bicarbonate transport system, periplasmic component; K02051 sulfonate/nitrate/taurine transport system substrate-binding protein	syr02010	K02051	NitT/TauT family transport system substrate-binding protein			0005488||0009897||0030288||0042626||0042918||0043190	A5GWW9					SynRCC307_2475-NC_009482	81	tauA; ABC-type nitrate/sulfonate/bicarbonate transport system, periplasmic component; K02051 sulfonate/nitrate/taurine transport system substrate-binding protein	CAM_CRCL_4014840	Synechococcus RCC307
contig_1302520_1_321_-	0.03	0.03	0.03	0.03	0.03	0.03	0.03	0.03	0.03	0.03	0.03	0.729606	0.03	0.03	0.03	0.03	0.03	0.03	0.03	0.03	0.03	0.823063	0.834777	0.0633146	0.0466573	-4.42175	0.473825	-1.07758	321	321	107														POR3G_03687-POR3G_contig_303.304	39	hypothetical protein		Poribacteria WGA-3G
contig_1302721_192_960_-	0.03	0.03	0.03	0.03	0.03	0.03	0.03	0.03	0.03	0.03	0.03	0.322033	0.663925	0.03	0.03	0.03	0.03	0.03	0.03	0.03	0.03	0.762305	0.834777	0.0740932	0.0520466	-4.26405	0.404895	-1.30438	960	769	256.333														CAMPEP_0200781238-CAMNT_0046936125	60			Karlodinium micrum, Strain CCMP2283
contig_1302751_1_676_-	0.03	0.03	0.03	0.03	0.03	0.03	0.03	0.03	0.03	0.03	0.03	0.03	0.03	0.03	0.03	0.03	0.03	0.03	0.371977	0.03	0.03	0.823063	0.834777	0.0462846	0.0381423	-4.71246	0.648164	-0.62557	676	676	225.333	pme:NATL1_05061	groEL; chaperonin GroEL (EC:3.6.4.9); K04077 chaperonin GroEL	pme03018	K04077	chaperonin GroEL	RNA degradation || Longevity regulating pathway - worm || Type I diabetes mellitus || Legionellosis || Tuberculosis		0005524||0044267	A2C0Q8					NATL1_05061-NC_008819	96	groEL; chaperonin GroEL (EC:3.6.4.9); K04077 chaperonin GroEL	CAM_CRCL_36	Prochlorococcus marinus str. NATL1A
contig_1303067_1_322_+	0.03	0.03	0.03	0.03	0.03	1.13481	0.718486	0.03	1.23261	3.54481	2.41687	0.727433	0.03	0.658965	0.50605	0.03	0.03	0.03	0.03	0.467791	1.0016	0.655452	0.834777	0.60664	0.804119	-0.31452	1.65106	0.723391	633	322	107.333	pub:SAR11_0807	tauA; taurine transport system periplasmic protein; K02051 sulfonate/nitrate/taurine transport system substrate-binding protein	pub02010	K02051	NitT/TauT family transport system substrate-binding protein				Q4FMG4					gi91762073-NZ_AAPV01000001	56	taurine transport system periplasmic protein	CAM_CRCL_33530173	Pelagibacter ubique HTCC1002
contig_1303067_337_633_-	0.03	0.03	0.03	0.03	0.665984	0.03	0.03	0.03	0.03	1.30022	1.32389	0.03	0.03	0.03	0.03	0.03	0.03	0.03	0.03	0.504643	0.03	0.657654	0.834777	0.204988	0.117494	-3.08934	0.14635	-2.7725	633	297	99	pub:SAR11_0807	tauA; taurine transport system periplasmic protein; K02051 sulfonate/nitrate/taurine transport system substrate-binding protein	pub02010	K02051	NitT/TauT family transport system substrate-binding protein				Q4FMG4					gi91762073-NZ_AAPV01000001	52	taurine transport system periplasmic protein	CAM_CRCL_33530173	Pelagibacter ubique HTCC1002
contig_1303863_74_814_-	0.03	0.03	0.03	0.03	0.03	0.03	0.03	0.03	0.03	0.03	0.03	0.03	0.03	0.03	0.03	0.03	0.199416	0.03	0.03	0.03	0.03	0.823063	0.834777	0.0380674	0.0340337	-4.87689	0.788075	-0.343594	1435	741	247														CAMPEP_0198156514-CAMNT_0043823323	70			Phaeocystis antarctica, Strain CCMP1374
contig_1304004_1_637_+	0.03	0.03	0.03	0.03	0.03	0.03	0.03	0.03	0.03	0.03	0.03	0.03	0.03	0.03	0.03	0.03	0.03	0.03	0.03	0.251301	0.03	0.823063	0.834777	0.0405382	0.0352691	-4.82545	0.740044	-0.434318	637	637	212.333	dsh:Dshi_1971	putative TRAP-transporter extracellular solute-binding protein						0006810||0030288	A8LP28					gi159179956-ABHC01000008	76	trap dicarboxylate transporter- dctp subunit	CAM_CRCL_4006732	alpha proteobacterium BAL199
contig_1304101_1_666_-	0.03	0.03	0.03	0.03	0.03	0.297079	0.03	0.03	1.19289	0.596452	0.607006	0.03	0.03	0.334094	0.260162	0.939172	0.03	0.03	0.03	0.03	0.03	0.56167	0.834777	0.221279	0.125639	-2.99264	0.135576	-2.88283	666	666	222														OAN307_c24480-NC_020911	47	putative branched-chain amino acid ABC transporter periplasmic substrate binding protein	CAM_CRCL_2201	Octadecabacter antarcticus 307
contig_1304314_1_343_+	0.03	0.03	0.03	0.03	0.03	0.03	0.03	0.03	0.03	1.12987	0.03	0.03	0.03	0.03	0.03	0.03	0.03	0.03	0.03	0.03	0.03	0.823063	0.834777	0.082375	0.0561875	-4.15361	0.364188	-1.45724	343	343	114.333														CAMPEP_0195058802-CAMNT_0040088977	67			Heterocapsa triquetra
contig_1304328_82_911_-	0.03	0.03	0.03	0.586774	0.03	0.03	0.03	0.03	0.03	0.03	0.03	0.03	0.03	0.03	0.03	0.03	0.03	0.03	0.03	0.03	0.03	0.823063	0.834777	0.056513	0.0432565	-4.53094	0.530851	-0.913621	911	830	276.667								0004872||0006810||0016020						AMBAS45_15280-NC_018679	100	TonB-dependent receptor	CAM_CRCL_6092273	Alteromonas macleodii str. 'Balearic Sea AD45'
contig_1304711_1_310_+	0.03	0.03	0.03	0.03	0.03	0.03	0.745138	0.03	0.03	0.03	0.03	0.03	0.03	0.03	0.03	0.03	0.03	0.03	0.03	0.03	0.03	0.823063	0.834777	0.0640542	0.0470271	-4.41036	0.468354	-1.09433	310	310	103.333														CAMPEP_0190971698-CAMNT_0034860499	49			Prorocentrum minimum CCMP1329
contig_1305718_57_953_-	1.01844	0.03	0.03	0.03	0.03	0.03	0.03	0.03	0.461707	1.29173	0.458413	0.03	0.301732	0.707347	1.22623	0.536278	0.03	0.172473	0.03	0.03	0.03	0.492189	0.834777	0.311159	0.17058	-2.55148	0.0964136	-3.37462	1404	897	299								0005198||0005882						ENSTRUP00000030842-scaffold_169FUGU4	89		CAM_CRCL_6198	Takifugu rubripes
contig_1306451_1_692_+	0.03	0.03	0.03	0.03	0.302959	0.03	0.350365	0.03	0.589598	0.03	0.03	0.354528	0.03	0.03	0.03	0.03	0.03	0.399358	0.03	0.03	0.03	0.59336	0.834777	0.117943	0.0739716	-3.75688	0.25436	-1.97506	772	692	230.667	pca:Pcar_2512	hypothetical protein							Q3A1K7					Pcar_2512-NC_007498	35	outer membrane channel	CAM_CRCL_32646341	Pelobacter carbinolicus DSM 2380
contig_1306623_518_871_-	0.03	0.03	0.03	0.03	0.03	0.03	0.03	0.03	0.03	0.03	0.03	0.03	0.03	0.03	0.463017	0.03	0.03	0.03	0.03	1.22465	0.03	0.770957	0.834777	0.107508	0.068754	-3.86241	0.279049	-1.84141	3186	354	118								0016491||0055114						or1696-POR4G_contig00100standard	64	Aerobic-type carbon monoxide dehydrogenase, large subunit CoxL/CutL homologs		Poribacteria WGA-4G
contig_1306843_118_780_-	0.03	0.03	0.03	2.12105	3.16388	3.24945	4.04254	4.03758	2.95037	6.28916	5.82617	0.707447	0.765276	0.33547	0.261204	1.17161	0.598042	1.18654	0.378682	0.880491	0.501877	0.479328	0.834777	1.83604	1.16896	0.225224	0.273347	-1.87119	1174	663	221	mpc:Mar181_3029	basic membrane lipoprotein; K07335 basic membrane protein A and related proteins		K07335	basic membrane protein A and related proteins			5886						gi159180977-ABHC01000004	67	Basic membrane protein	CAM_CRCL_15341	alpha proteobacterium BAL199
contig_1307042_1_430_-	0.03	0.03	0.03	0.03	0.03	0.03	0.03	0.03	0.03	0.03	0.03	0.03	0.03	0.03	0.03	0.03	0.03	0.624409	1.10524	0.03	0.03	0.756163	0.834777	0.109507	0.0697535	-3.84159	0.273955	-1.86799	430	430	143.333														CAMPEP_0119010630-CAMNT_0006963329	39			Synedropsis cf. recta
contig_1307107_1_657_-	0.03	0.03	0.03	0.733383	1.18	1.11295	1.0423	1.37806	0.619409	0.604211	0.61491	0.371817	0.03	0.33826	0.263315	0.490813	0.03	0.224517	0.03	0.673693	0.03	0.296954	0.834777	0.469411	0.249706	-2.0017	0.0639098	-3.96782	657	657	219														JCVI_PEP_metagenomic.orf.1126664261510.1-SAR324	77		CAM_CRCL_4010371	SAR324 cluster bacterium JCVI-SC AAA005
contig_1307167_1172_1991_+	0.03	0.03	0.03	0.03	0.03	0.03	0.03	0.03	0.03	0.03	0.03	0.03	0.03	0.03	0.03	0.03	0.03	0.03	0.03	0.373826	0.03	0.823063	0.834777	0.0463727	0.0381863	-4.7108	0.646933	-0.628313	1992	820	273.333								30288						BYI23_D008130-NC_016626	28	hypothetical protein		Burkholderia YI23
contig_1307360_212_978_-	0.03	0.03	0.03	0.03	0.03	0.03	0.03	0.03	0.03	0.03	0.03	0.03	0.03	0.03	0.03	0.03	0.03	0.03	0.03	0.213792	0.03	0.823063	0.834777	0.038752	0.034376	-4.86245	0.774153	-0.369309	978	767	255.667														POR3G_00051-POR3G_contig_303.304	50	Uncharacterized protein conserved in bacteria		Poribacteria WGA-3G
contig_1307506_1_545_+	0.03	0.03	0.03	9.78121	10.0809	9.16852	11.4197	22.7813	14.9512	4.8755	7.08112	7.44711	8.97474	9.32022	9.03041	6.97391	1.87275	4.01636	0.878353	4.16853	1.17809	0.300123	0.834777	6.86143	4.01976	2.00711	0.171697	-2.54206	723	545	181.667	nde:NIDE3237	nxrA1; putative nitrate oxidoreductase subunit alpha (EC:1.7.99.4); K00370 nitrate reductase 1, alpha subunit [EC:1.7.99.4]	nde02020||nde00910||nde01120	K00370	nitrate reductase alpha subunit [EC:1.7.99.4]	Nitrogen metabolism || Two-component system	1.7.99.4	8940						KSU1_D0577-GCA_000296795.1_BAFH01000004	69	nitrate reductase alpha subunit		planctomycete KSU-1
contig_1308072_427_683_-	0.03	0.03	0.03	5.42442	0.76497	0.72212	0.03	0.03	0.03	0.03	0.03	0.03	0.03	0.03	0.03	0.03	0.03	0.03	0.03	0.03	0.03	0.778095	0.834777	0.354834	0.192417	-2.37769	0.0845466	-3.56411	683	257	85.6667								0000276||0015078||0015986||0045263||0045264||0046933						AMBLS11_18950-NC_018692	100	F0F1 ATP synthase subunit B (EC:3.6.3.14)	CAM_CRCL_5403	Alteromonas macleodii str. 'Black Sea 11'
contig_1308105_1_602_+	0.03	0.03	0.03	0.03	0.03	0.03	0.03	0.03	0.03	0.03	0.03	0.03	0.03	0.03	0.03	0.03	0.03	0.03	0.03	0.264168	0.03	0.823063	0.834777	0.0411508	0.0355754	-4.81298	0.729025	-0.455959	791	602	200.667	pna:Pnap_0552	hypothetical protein; K01999 branched-chain amino acid transport system substrate-binding protein	pna02010	K01999	branched-chain amino acid transport system substrate-binding protein	ABC transporters			A1VJP4					P24_04005-GCA_000299935.1_contig3	52	hypothetical protein		Oceanibaculum indicum P24
contig_1308887_46_975_-	0.03	0.03	0.03	0.03	0.03	0.03	0.03	0.03	0.03	0.03	0.03	0.03	0.03	0.03	0.03	0.03	0.03	0.579669	0.03	0.484738	0.03	0.746807	0.834777	0.0778289	0.0539144	-4.21318	0.385461	-1.37534	2509	930	310														Sinac_1372-Sinac_Contig48.4	32	prepilin-type N-terminal cleavage/methylation domain		Singulisphaera acidiphila DSM 18658
contig_1309167_53_856_+	0.03	0.03	0.03	0.31739	0.264934	0.03	0.305737	0.03	0.03	0.03	0.03	0.30932	0.333164	0.281899	0.220657	0.03	0.03	0.347905	0.317533	0.205334	0.03	0.353573	0.834777	0.153994	0.091997	-3.44227	0.194813	-2.35984	880	804	268														CAMPEP_0199855630-CAMNT_0045757887	43			Favella taraikaensis, Strain Fe Narragansett Bay
contig_1309192_1_283_-	0.03	0.03	0.03	0.03	0.03	0.03	0.03	0.03	0.03	1.36306	0.03	0.03	0.03	0.03	0.03	0.03	0.03	0.03	0.03	0.03	0.03	0.823063	0.834777	0.0934792	0.0617396	-4.01766	0.320927	-1.63968	646	283	94.3333														AZKH_4030-NC_020516	55	livK; branched-chain amino acid ABC transporter system, substrate-binding protein		Azoarcus KH32C
contig_1309192_319_646_+	0.03	0.03	0.03	0.03	0.03	0.03	0.03	0.03	0.03	1.18017	0.03	0.03	0.03	0.03	0.03	0.491516	0.03	0.03	0.03	0.03	0.03	0.767266	0.834777	0.106747	0.0683735	-3.87042	0.281038	-1.83116	646	328	109.333	cnc:CNE_1c03010	HAAT family ABC transporter permease; K01999 branched-chain amino acid transport system substrate-binding protein	cnc02010	K01999	branched-chain amino acid transport system substrate-binding protein	ABC transporters								CNE_1c03010-NC_015726	60	HAAT family ABC transporter permease; K01999 branched-chain amino acid transport system substrate-binding protein	CAM_CRCL_15378	Cupriavidus necator N-1
contig_1309242_1_899_+	0.03	0.03	0.03	0.03	0.240108	0.227859	0.276599	0.03	0.03	0.03	0.03	0.03	0.301128	0.25528	0.20051	0.198384	0.169641	0.172156	0.03	0.03	0.03	0.405531	0.834777	0.114365	0.0721825	-3.79221	0.262318	-1.93061	899	899	299.667														Psta_3067-NC_013720	55	autotransporter-associated beta strand repeat protein	CAM_CRCL_14702703	Pirellula staleyi DSM 6068
contig_1309740_1_790_-	0.03	0.03	0.03	0.614965	1.22549	1.15579	1.43312	0.03	1.50054	0.985081	1.00288	1.16708	0.95561	0.799089	1.38825	1.1797	0.506723	0.677078	0.615256	1.27909	0.426018	0.422163	0.834777	0.811036	0.618527	-0.693091	0.525277	-0.928851	1483	790	263.333	nde:NIDE3278	putative nitrate reductase subunit gamma (EC:1.7.99.4)						20037						NIDE3278-NC_014355	53	putative nitrate reductase subunit gamma (EC:1.7.99.4)	CAM_CRCL_4069661	Nitrospira defluvii
contig_1309799_21_592_-	0.03	0.03	0.03	0.03	0.03	0.03	0.03	0.03	0.03	0.03	0.03	0.03	0.03	0.03	0.03	0.03	0.03	0.253423	0.434154	0.276449	0.03	0.695599	0.834777	0.0716203	0.0508102	-4.29874	0.418876	-1.25541	592	572	190.667														or3661-POR4E_contig00324standard	43	Outer membrane protein and related peptidoglycan-associated (lipo)proteins		Poribacteria WGA-4E
contig_1310472_1_1582_-	0.03	0.03	0.03	0.03	0.03	0.03	0.03	0.03	0.03	0.03	0.03	0.171955	0.184073	0.15802	0.03	0.03	0.109353	0.110783	0.03	0.119108	0.03	0.546803	0.834777	0.0620615	0.0460308	-4.44126	0.483391	-1.04874	1583	1582	527.333														CAMPEP_0199476706-CAMNT_0045299647	51	TIGR00483: EF-1_alpha: translation elongation factor EF-1, subunit alpha PF00009.22: Elongation factor Tu GTP binding domain PF03144.20: Elongation factor Tu domain 2		Ceratium fusus, Strain PA161109
contig_1310938_1_916_+	0.03	0.03	0.03	0.03	0.03	0.03	0.03	0.03	0.452753	0.441852	0.449526	0.03	0.03	0.03	0.03	0.03	0.03	0.03	0.03	0.03	0.371544	0.0914099	0.834777	0.105985	0.238764	-2.06634	3.50564	1.80968	916	916	305.333														OAN307_c24480-NC_020911	52	putative branched-chain amino acid ABC transporter periplasmic substrate binding protein	CAM_CRCL_2201	Octadecabacter antarcticus 307
contig_1311005_82_484_+	0.03	0.03	0.03	0.603353	0.03	0.471377	0.03	0.03	0.03	0.03	0.03	0.03	0.03	0.03	0.03	0.03	0.03	0.03	0.03	0.03	0.03	0.747868	0.834777	0.0783205	0.0541602	-4.20662	0.383042	-1.38443	484	403	134.333								0003746||0005515||0005622||0006414						AMBAS45_04710-NC_018679	79	tsf; elongation factor Ts		Alteromonas macleodii str. 'Balearic Sea AD45'
contig_1311121_405_935_+	0.03	0.03	0.03	0.03	0.03	0.03	0.03	0.03	0.03	0.03	0.03	0.03	0.03	0.03	0.03	0.03	0.03	0.03	0.03	0.295478	0.03	0.823063	0.834777	0.0426418	0.0363209	-4.78306	0.703535	-0.507306	1055	531	177	gsu:GSU3038	fliC; flagellin FliC; K02406 flagellin	gsu02020||gsu02040	K02406	flagellin	Two-component system || Flagellar assembly || Plant-pathogen interaction || Salmonella infection || Legionellosis		0005198||0009288||0071973	Q748G4					KN400_2978-CP002031	49	flagellin FliC	CAM_CRCL_24713	Geobacter sulfurreducens KN400
contig_1311221_1_784_-	0.03	0.03	0.03	0.324721	0.03	0.03	0.03	0.03	0.03	0.03	0.03	0.03	0.03	0.03	0.03	0.03	0.190124	0.03	0.03	0.03	0.03	0.756715	0.834777	0.0516593	0.0408296	-4.61424	0.580728	-0.784065	1332	784	261.333								0005509||0007155						gi126662605-NZ_AAXX01000001	63	outer membrane protein OmpA family P60	CAM_CRCL_26150	Flavobacteria bacterium BAL38
contig_1311221_991_1331_-	0.03	0.03	0.03	1.3852	0.03	0.03	0.03	0.03	0.03	0.03	0.03	0.03	0.03	0.03	0.03	0.03	0.03	0.03	0.03	0.03	0.03	0.823063	0.834777	0.0945332	0.0622666	-4.0054	0.317349	-1.65586	1332	341	113.667														gi126662605-NZ_AAXX01000001	71	outer membrane protein OmpA family P60	CAM_CRCL_26150	Flavobacteria bacterium BAL38
contig_1311445_916_1302_-	0.03	0.03	0.03	1.22411	0.03	0.03	0.03	0.03	0.03	0.03	0.03	0.03	0.03	0.03	0.03	0.03	0.03	0.03	0.03	0.03	0.03	0.823063	0.834777	0.0868626	0.0584313	-4.09711	0.345373	-1.53377	1572	387	129	amc:MADE_1008790	Acyl-CoA dehydrogenase; K00257 [EC:1.3.99.-]	amc01110||amc00626||amc00281||amc01120	K00257		Geraniol degradation								gi521332112-CP004849	99	acyl-CoA dehydrogenase		Alteromonas macleodii str. 'Ionian Sea U4'
contig_1312350_112_926_-	0.03	0.03	0.03	0.03	0.03	0.03	0.03	0.03	0.03	0.03	0.03	0.30555	0.03	0.03	0.03	0.03	0.03	0.03	0.03	0.03	0.03	0.823063	0.834777	0.0431214	0.0365607	-4.77356	0.695709	-0.523443	1329	815	271.667														CAMPEP_0176371716-CAMNT_0017731295	45			Strombidinopsis acuminata
contig_1312512_1_887_-	0.03	0.03	0.03	0.03	0.03	0.03	0.03	0.03	0.03	0.03	0.03	0.03	0.03	0.03	0.03	0.03	0.03	0.03	0.03	0.347855	0.03	0.823063	0.834777	0.045136	0.037568	-4.73435	0.664658	-0.589315	972	887	295.667	nde:NIDE1378	groL; chaperonin GroEL; K04077 chaperonin GroEL	nde03018	K04077	chaperonin GroEL	RNA degradation || Longevity regulating pathway - worm || Type I diabetes mellitus || Legionellosis || Tuberculosis		0005524||0044267						NIDE1378-NC_014355	85	groL; chaperonin GroEL; K04077 chaperonin GroEL	CAM_CRCL_36	Nitrospira defluvii
contig_1312529_1_639_+	0.03	0.03	0.03	0.03	0.03	0.03	0.03	0.03	0.03	0.03	0.03	0.03	0.03	0.03	0.03	0.03	0.619376	0.03	0.03	0.03	0.03	0.823063	0.834777	0.0580655	0.0440328	-4.50528	0.516658	-0.95272	725	639	213								0005509||0009523||0009654||0015979||0019898||0042549						CAMPEP_0199709690-CAMNT_0045576719	84	PF01716.13: Manganese-stabilising protein / photosystem II polypeptide		Pelagomonas calceolata , Strain CCMP1756
contig_1312692_275_809_+	0.03	0.03	0.03	7.37213	6.03203	7.34448	8.73195	3.34094	9.43961	7.08153	5.05804	5.48693	11.4199	4.95121	6.33344	5.68896	1.20324	3.852	2.19053	3.19192	0.03	0.148967	0.834777	4.70661	2.36831	1.24386	0.00637401	-7.29358	809	535	178.333														gi528327086-CP005996	38	hypothetical protein		Cycloclasticus zancles 7-ME
contig_1313275_1_644_-	0.03	0.03	0.03	0.03	0.03	0.03	0.03	0.03	0.03	0.03	0.03	0.03	0.03	0.03	0.03	0.03	0.03	0.03	0.03	0.686687	0.03	0.823063	0.834777	0.0612708	0.0456354	-4.4537	0.48963	-1.03024	644	644	214.667	pmk:MDS_0838	putative transport protein						0006810||0030288						gi85706294-NZ_AAMV01000011	33	trap dicarboxylate transporter- dctp subunit	CAM_CRCL_33331752	Roseovarius 217
contig_1314393_59_913_-	0.03	0.03	0.03	0.03	0.03	0.03	0.03	0.03	0.03	0.03	0.03	0.03	0.03	0.03	0.03	0.03	0.176827	0.478414	0.300382	0.524628	0.03	0.658946	0.834777	0.0947738	0.0623869	-4.00261	0.316543	-1.65953	1059	855	285														gi494248524-NZ_AFIG01000003	85	hypothetical protein		Methylophaga aminisulfidivorans MP
contig_1314423_1002_1684_+	0.03	0.03	0.03	0.03	0.03	0.03	0.03	0.03	0.03	0.03	0.03	0.03	0.03	0.03	0.03	0.03	0.213803	0.03	0.03	0.03	0.03	0.823063	0.834777	0.0387525	0.0343763	-4.86244	0.774144	-0.369327	1685	683	227.667														CAMPEP_0191909562-CAMNT_0035992769	36			Scrippsiella hangoei SHTV5
contig_1314869_185_617_+	0.03	0.03	0.03	0.03	0.03	0.03	0.03	0.03	0.03	0.03	0.03	0.03	0.03	0.03	0.03	0.03	0.319924	0.325145	0.03	0.03	0.03	0.745614	0.834777	0.0578605	0.0439302	-4.50864	0.518489	-0.947615	617	433	144.333	tps:THAPSDRAFT_21815	AMS1; probable S-adenosylmethionine synthetase; K00789 S-adenosylmethionine synthetase [EC:2.5.1.6]	tps01100||tps01110||tps00270	K00789	S-adenosylmethionine synthetase [EC:2.5.1.6]	Cysteine and methionine metabolism || Biosynthesis of amino acids	2.5.1.6	0004478||0006556	B8BY55	KOG1506	S-adenosylmethionine synthetase	Coenzyme transport and metabolism	METABOLISM	CAMPEP_0181442712-CAMNT_0023566645	82	TIGR01034: metK: methionine adenosyltransferase PF02773.11: S-adenosylmethionine synthetase, C-terminal domain PF02772.11: S-adenosylmethionine synthetase, central domain		Symbiodinium, Strain CCMP421
contig_1314919_1_645_-	0.03	0.03	0.03	0.03	0.03	0.03	0.03	0.03	0.630374	0.03	0.03	0.03	0.03	0.03	0.03	0.03	0.224631	0.03	0.388413	0.03	0.03	0.711586	0.834777	0.0849247	0.0574623	-4.12124	0.353254	-1.50122	1119	645	215								0005198||0009288||0071973						MEALZ_0746-NC_016112	42	lafA; Lateral flagellin		Methylomicrobium alcaliphilum 20Z
contig_1314929_547_858_-	0.03	0.03	0.03	0.03	0.03	0.03	0.03	0.03	0.03	0.03	0.03	0.03	0.03	0.03	0.03	0.03	0.834725	0.03	0.03	0.03	0.03	0.823063	0.834777	0.0683203	0.0491601	-4.34637	0.439108	-1.18735	903	312	104	pmm:PMM1022	hypothetical protein							Q7V163					PMM1022-NC_005072	76	hypothetical protein	CAM_CRCL_6019008	Prochlorococcus marinus subsp. pastoris str. CCMP1986
contig_1314975_1_735_-	0.03	0.03	0.03	0.973107	0.28699	0.03	0.03	0.03	0.03	0.03	0.03	0.03	0.361625	0.03	0.03	0.03	0.03	0.203875	0.03	0.221794	0.03	0.672769	0.834777	0.120352	0.075176	-3.73358	0.249269	-2.00422	735	735	245	sde:Sde_0929 || sde:Sde_0931	elongation factor Tu (EC:3.6.5.3); K02358 elongation factor Tu || elongation factor Tu (EC:3.6.5.3); K02358 elongation factor Tu		K02358	elongation factor Tu			0003924||0005525	Q21M86					gi119502908-NZ_AAVV01000001	93	translation elongation factor Tu	CAM_CRCL_30	marine gamma proteobacterium HTCC2080
contig_1315117_1_883_-	0.03	0.03	0.03	0.03	0.03	0.03	0.03	0.03	0.03	0.457244	0.03	0.03	0.03	0.259362	0.203599	0.03	0.314342	0.174732	0.03	0.03	0.03	0.610813	0.834777	0.0899657	0.0599829	-4.05931	0.33346	-1.58441	1489	883	294.333														CAMPEP_0200812108-CAMNT_0046973451	76			Karlodinium micrum, Strain CCMP2283
contig_1317_1_381_+	0.03	0.03	0.03	0.03	0.03	0.03	0.03	0.03	0.03	0.03	0.03	0.03	0.03	0.561567	0.03	0.03	0.359494	0.03	0.03	0.399997	0.03	0.690718	0.834777	0.0886218	0.0593109	-4.07556	0.338517	-1.5627	381	381	127								3924		KOG1375	Beta tubulin	Cytoskeleton	CELLULAR PROCESSES AND SIGNALING	CAMPEP_0114679374-CAMNT_0001954653	66	PF00091.20: Tubulin/FtsZ family, GTPase domain PF03953.12: Tubulin C-terminal domain		Sorites sp.
contig_1317485_1_714_+	0.03	0.03	0.03	0.03	0.03	0.03	0.03	0.03	0.03	0.03	0.03	0.344529	0.03	0.03	0.03	0.03	0.03	0.03	0.03	0.227435	0.03	0.752419	0.834777	0.0543792	0.0421896	-4.56697	0.551681	-0.858094	1271	714	238	cls:CXIVA_15960	hypothetical protein						0008270||0016491||0055114		KOG0024	Sorbitol dehydrogenase	Secondary metabolites biosynthesis, transport and catabolism	METABOLISM	POR3G_03200-POR3G_contig_303.304	75	Threonine dehydrogenase and related Zn-dependent dehydrogenases		Poribacteria WGA-3G
contig_1317546_2040_2699_+	0.03	0.03	0.03	0.03	0.03	0.03	0.03	0.03	0.03	0.03	0.03	0.03	0.03	0.03	0.03	0.03	0.03	0.03	0.03	0.243589	0.03	0.823063	0.834777	0.0401709	0.0350855	-4.83298	0.746809	-0.421189	3577	660	220	gsu:GSU0332	pepA; leucyl aminopeptidase (EC:3.4.11.1); K01255 leucyl aminopeptidase [EC:3.4.11.1]	gsu00480||gsu01100	K01255	leucyl aminopeptidase [EC:3.4.11.1]	Glutathione metabolism	3.4.11.1	0004177||0005622||0006508	Q74GB4					or2241-POR4E_contig00324standard	64	Leucyl aminopeptidase		Poribacteria WGA-4E
contig_1317693_1_1043_+	0.03	0.03	0.03	0.03	0.03	0.03	0.03	0.03	0.03	0.03	0.03	0.03	0.03	0.03	0.03	0.03	0.03	0.152529	0.03	0.03	0.03	0.823063	0.834777	0.0358347	0.0329174	-4.92501	0.837177	-0.256396	1044	1043	347.667	vei:Veis_2278	extracellular solute-binding protein; K02027 multiple sugar transport system substrate-binding protein		K02027	multiple sugar transport system substrate-binding protein			0005215||0006810	A1WK69					Veis_2278-NC_008786	53	extracellular solute-binding protein; K02027 multiple sugar transport system substrate-binding protein	CAM_CRCL_23192	Verminephrobacter eiseniae EF01-2
contig_1317716_511_961_+	0.03	0.03	0.03	0.03	0.448819	0.03	0.521558	0.03	1.74726	0.86649	0.882076	0.03	0.03	0.03	0.70977	0.701296	0.03	0.03	0.03	0.03	0.03	0.545015	0.834777	0.29987	0.164935	-2.60003	0.100043	-3.3213	961	451	150.333	nde:NIDE3278	putative nitrate reductase subunit gamma (EC:1.7.99.4)						20037						NIDE3278-NC_014355	39	putative nitrate reductase subunit gamma (EC:1.7.99.4)	CAM_CRCL_4069661	Nitrospira defluvii
contig_1317845_1_521_-	0.03	0.03	0.03	0.03	0.392548	1.73705	1.73205	0.03	0.03	0.03	0.03	0.03	0.03	0.03	0.324219	1.1922	0.03	0.03	0.03	0.03	0.03	0.643544	0.834777	0.278956	0.154478	-2.69453	0.107544	-3.217	1201	521	173.667	dsh:Dshi_1413	family 1 extracellular solute-binding protein							A8LJD3					gi162282768-ABIA02000006	55	extracellular solute-binding protein family 1	CAM_CRCL_20169	Hoeflea phototrophica DFL-43
contig_1317889_45_857_-	0.03	0.03	0.03	0.03	0.262334	0.03	0.03	0.03	0.03	0.03	0.03	0.03	0.03	0.03	0.03	0.03	0.184412	0.187193	0.31435	0.03	0.03	0.641519	0.834777	0.0694423	0.0497212	-4.33	0.432013	-1.21085	857	813	271														CAMPEP_0200855978-CAMNT_0047032509	68			Karlodinium micrum, Strain CCMP2283
contig_1317928_1_683_+	0.03	0.03	0.03	0.03	0.03	0.03	0.03	0.03	0.03	0.03	0.03	0.03	0.03	0.03	0.03	0.03	0.03	0.03	0.03	0.236397	0.03	0.823063	0.834777	0.0398284	0.0349142	-4.84004	0.753231	-0.408835	705	683	227.667	apb:SAR116_1391	glycine betaine ABC transporter substrate-binding protein (EC:1.1.1.103); K02002 glycine betaine/proline transport system substrate-binding protein	apb02010	K02002	glycine betaine/proline transport system substrate-binding protein	ABC transporters		0005215||0006810	D5BTN7					HIMB114_0898-NZ_GG704932	70	oligopeptide ABC transporter, oligopeptide-binding protein	CAM_CRCL_2583	alpha proteobacterium HIMB114
[truncated: 2,656 more rows]
[truncated: 20 more columns]
